# Supplementary material for: Synthesis of chiral α-trifluoromethyl alcohols and ethers via enantioselective Hiyama cross-couplings of bisfunctionalized electrophiles
Source: PubMed Central journal article supplement (PMC6120892; doi:10.1038/s41467-018-05946-3), 2018-09-03
Supplement: 41467_2018_5946_MOESM1_ESM.pdf [file 41467_2018_5946_MOESM1_ESM.pdf]

# Synthesis of chiral $\alpha$ -trifluoromethyl alcohols and ethers via enantioselective Hiyama cross-couplings of bisfunctionalized electrophiles.

Varenikov et al.

## Supplementary methods

**General information.** All reactions were generally performed in glove box or in dried glassware under an atmosphere of dry N<sub>2</sub>. Reaction mixtures were stirred magnetically unless otherwise indicated and monitored either by <sup>19</sup>F NMR spectroscopy of the reaction mixture or thin layer chromatography (TLC) on Merck precoated glass-backed silica gel 60 F-254 0.25 mm plates with visualization by fluorescence quenching at 254 nm. TLC plates were stained using potassium permanganate. Chromatography purification of products (flash column chromatography) was performed on silica gel 60 (70-230 mesh or 240-400 mesh Merck) using a forced flow of eluent at 0.3-0.5 bar. Concentration of reaction product solutions and chromatography fractions under reduced pressure was performed by rotary evaporation at 35-45 °C at the appropriate pressure and then at room temperature, c.a. 10 mmHg (vacuum pump) unless otherwise indicated. All chemicals, including dry solvents were purchased from Aldrich, Fluka, Acros, TCI, FluoroChem or Alfa Aesar and used as such unless stated otherwise. Yields given refer to chromatographically purified compounds unless otherwise demonstrated. Anhydrous DMA was purchased from Aldrich and stored over 4Å molecular sieves. TBAT was recrystallized prior to use.<sup>1</sup> Ligand was synthesized according to known procedures. Phenyl-, 4-methoxyphenyl-, p-tolyl- and 4-vinylphenyl trimethoxysilanes were obtained from commercial sources. <sup>1</sup>H NMR spectra were recorded on Bruker 600 MHz, 500 MHz, 400 MHz and 300 MHz spectrometer. <sup>13</sup>C NMR spectra were recorded on Bruker 125 MHz, 100 MHz and 75 MHz spectrometer. <sup>19</sup>F NMR spectra were recorded on Bruker 188 MHz. <sup>1</sup>H NMR chemical shifts are reported in parts per million (δ) downfield from tetramethylsilane (the peak of residual CHCl<sub>3</sub> in CDCl<sub>3</sub> at 7.26 ppm as reference). <sup>13</sup>C NMR chemical shifts are reported in parts per million (δ) downfield from tetramethylsilane (the central peak of CDCl<sub>3</sub> at 77.16 ppm as reference). <sup>29</sup>Si NMR chemical shifts are reported in parts per million (δ) downfield from tetramethylsilane (tetramethylsilane peak at 0 ppm as reference). <sup>19</sup>F NMR chemical shifts are reported in parts per million (δ) (C<sub>6</sub>F<sub>6</sub> peak at -161.9 ppm as reference). All <sup>13</sup>C spectra are proton decoupling. NMR coupling constants (J) are reported in Hertz (Hz), and splitting patterns are indicated as follows: bs – broad singlet; s – singlet; d – doublet; dd – doublet of doublet; ddd – doublet of doublet of doublet; dt – doublet of triplet; t – triplet; tt – triplet of triplets; q – quartet; m – multiplet, dm – doublet of multiplets. High resolution mass spectrometric measurements (HRMS) were performed by the Waters LCT Premier and Bruker Maxis Impact with APCI solid probe. Enantiomeric excess was determined by HPLC analysis on Shimadzu HPLC (LC-20AT pump; SPD-M20A diode array detector; DGU-20A<sub>5</sub> degasser; SIL-20A auto sampler;. Short path distillation was performed using Buchi Glass Oven B-585 Kugelrohr.

## Preparation of substrates

Reaction conditions for the following transformations are not optimized.

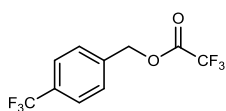

### 4-(trifluoromethyl)benzyl trifluoroacetate(16a).

To the solution of 3.52 g (20 mmol) 4-(trifluoromethyl)benzyl alcohol in 50 ml of dry dichloromethane was slowly added 4.4 g (2.95 ml, 21 mmol) of trifluoroacetic anhydride and stirred for 30 min. After evaporation of solvent, 4-(trifluoromethyl)benzyl trifluoroacetate was obtained as colorless liquid in quantitative yield (5.4 g).

**<sup>1</sup>H NMR (300 MHz, CDCl<sub>3</sub>):** δ 7.68 (d,  $J^{\text{H-H}} = 8.1$  Hz, 2H), 7.52 (d,  $J^{\text{H-H}} = 8.1$  Hz, 2H), 5.41 (s, 2H). **<sup>13</sup>C NMR (75 MHz, CDCl<sub>3</sub>):** δ 157.4 (q,  $J^{\text{C-F}} = 43.1$  Hz), 137.2, 131.6 (q,  $J^{\text{C-F}} = 33$  Hz), 128.7, 126.1 (q,  $J^{\text{C-F}} = 3.8$  Hz), 123.9 (q,  $J^{\text{C-F}} = 271$  Hz), 114.6 (q,  $J^{\text{C-F}} = 285$  Hz), 68.5. **<sup>19</sup>F NMR (188 MHz, CDCl<sub>3</sub>):** δ -63.0 (s, 3F), -75.0 (s, 3F).  $R_f = 0.41$  (15% DCM/hexane).

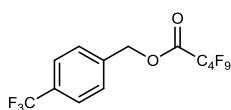

### 4-(trifluoromethyl)benzyl perfluoropentanoate(16b).

To the solution of perfluoropentanoic acid (3.96 g, 2.3 ml, 15 mmol), oxalyl chloride (1.4 ml, 16.5 mmol) in 50 ml of dry DCM was added dropwise dry DMF (0.25 ml, 3 mmol). Reaction was stirred until gas evolution has ceased (ca. 3h), then for additional 3h, and treated with solution of (4-trifluoromethyl)benzyl alcohol (2.3 ml 16.5 mmol) in 20 ml of DCM. After 1h solvent was evaporated and residue was subjected to column chromatography (eluent: 10% DCM in Hexane) giving the title compound in 71% yield (4.5g).

**<sup>1</sup>H NMR (300 MHz, CDCl<sub>3</sub>):** δ 7.67 (d,  $J^{\text{H-H}} = 8.1$  Hz, 2H), 7.51 (d,  $J^{\text{H-H}} = 8.1$  Hz, 2H), 5.43 (s, 2H). **<sup>13</sup>C NMR (75 MHz, CDCl<sub>3</sub>):** 158.2 (t,  $J^{\text{C-F}} = 30$  Hz), 137.1, 131.6 (q,  $J^{\text{C-F}} = 33$  Hz), 128.7, 126.1 (q,  $J^{\text{C-F}} = 3.8$  Hz), 123.9 (q,  $J^{\text{C-F}} = 272$  Hz). *Signals for carbons of the perfluoroalkyl group were not observed.* **<sup>19</sup>F NMR (188 MHz, CDCl<sub>3</sub>):** δ -63.0 (s, 3F), -81.0 (t,  $J^{\text{F-F}} = 9.5$  Hz, 3F), -118.7 (m, 2F), -123.6 (m, 2F), -126.2 (m, 2F). **HRMS (APCI, -MS)** calcd. for [M-H] C<sub>13</sub>H<sub>5</sub>F<sub>12</sub>O<sub>2</sub> m/z: 421.0103, found: 421.0169.  $R_f = 0.49$  (15% DCM/hexane).

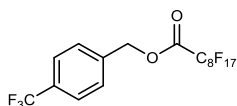

### 4-(trifluoromethyl)benzyl perfluorononanoate(16c).

Mixture of perfluorononanoic acid (2.9 g, 6.3 mmol), 4-trifluoromethylbenzyl alcohol (1.2 g, 0.95 ml, 7 mmol) and toluenesulfonic acid (173 mg, 1 mmol) in toluene (50 ml) was refluxed overnight with Dean-Stark trap. Evaporation of solvent and purification by column chromatography (eluent: 10% DCM in Hexane) gave the title compound in 77% yield (3.1 g).

**<sup>1</sup>H NMR (300 MHz, CDCl<sub>3</sub>):** δ 7.67 (d,  $J^{\text{H-H}} = 8.1$  Hz, 2H), 7.51 (d,  $J^{\text{H-H}} = 8.1$  Hz, 2H), 5.43 (s, 2H). **<sup>13</sup>C NMR (75 MHz, CDCl<sub>3</sub>):** δ 158.3 (t,  $J^{\text{C-F}} = 30$  Hz), 137.1, 131.6 (q,  $J^{\text{C-F}} = 33$  Hz), 128.8, 126.0 (q,  $J^{\text{C-F}} = 3.8$  Hz), 123.9 (q,  $J^{\text{C-F}} = 272$  Hz), 68.9. *Signals for carbons of the perfluoroalkyl group were not observed.* **<sup>19</sup>F NMR (188 MHz, CDCl<sub>3</sub>):** δ -63.1 (s, 3F), -81.0 (t,  $J^{\text{F-F}} = 10$  Hz, 3F), -118.5 (m, 2F), -

122.4 – -121.5(m, 6F), -122.8(m, 2F), -126.3(m, 2F). **HRMS** (APCI, -MS) calcd. for [M-H]  $C_{17}H_{21}F_5O_2$  m/z: 620.9976, found: 621.0017.  $R_f = 0.50$  (15% DCM/hexane).

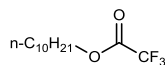

**n-decyl trifluoroacetate(16d).**

The title compound was synthesized similarly to **16a** using 3.2 g (20 mmol) of *n*-decanol. Evaporation of solvent gave *n*-decyl trifluoroacetate in quantitative yield (5.4g).

Spectroscopic data is similar to previously reported.<sup>2</sup>

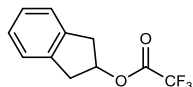

**2-indanyl trifluoroacetate(16e).**

The title compound was synthesized similarly to **16a** using 1.34 g (10 mmol) of 2-indanol. Evaporation of solvent gave 2-indanyl trifluoroacetate in quantitative yield (2.3 g).

**<sup>1</sup>H NMR (400 MHz, CDCl<sub>3</sub>):**  $\nu$  7.08-7.35(m, 4H), 5.71(m, 1H), 3.41(dd,  $J^{H-H} = 17.3$  Hz, 6.5 Hz, 2H), 3.41(dd,  $J^{H-H} = 17.3$  Hz, 2.9 Hz, 2H). **<sup>13</sup>C NMR (100 MHz, CDCl<sub>3</sub>):**  $\delta$  157.6(q,  $J^{C-F} = 42.3$  Hz), 139.3, 127.4, 124.8, 114.6(q,  $J^{C-F} = 286$  Hz). **<sup>19</sup>F NMR (188 MHz, CDCl<sub>3</sub>):**  $\delta$  -75.3.

**Cholesteryl trifluoroacetate(16f).**

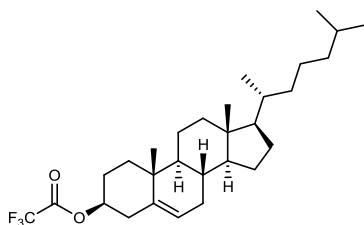

The title compound was synthesized similarly to **16a** using 1.93 g (5 mmol) of cholesterol. Evaporation of solvent gave 2-cholesteryl trifluoroacetate in quantitative yield (2.4 g).

Spectroscopic data is similar to previously reported.<sup>3</sup>

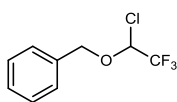

**1-chloro-1-benzyloxy-2,2,2-trifluoroethane(4a).**

The title compound was synthesized by combination of two literature modified processes.<sup>4, 5</sup> A solution of 4-(trifluoromethyl)benzyl trifluoroacetate (5.4 g, 20 mmol) in diethyl ether (20 mL) was added slowly at -78 °C to a suspension of LiAlH<sub>4</sub> (266 mg, 7 mmol) in diethyl ether (30 mL). The reaction mixture was stirred at this temperature for 3 h and then treated slowly with cooled H<sub>2</sub>SO<sub>4</sub> (1M, 20 mL). The upper layer was separated and the aqueous phase was extracted with diethyl ether (2×20 ml). Combined organic phases were dried over Na<sub>2</sub>SO<sub>4</sub>, solvent evaporated. The residue was dissolved in 100 ml of dry dichloromethane, combined with triphenyl phosphite (7.4 g, 6.3 ml, 24 mmol) and cooled to 0°C with ice bath. To the obtained vigorously stirred solution in small portions was added NCS was added N-Chlorosuccinimide (4 g, 30 mmol) in small portions (Caution! Very exothermic!). Reaction mixture was removed from ice bath and stirred for 5 minutes. To the reaction mixture was added ~50 g of silica, solvent evaporated. Obtained mixture was subjected to column chromatography (eluent: hexane) giving 1-chloro-1-(4-trifluoromethyl)benzyloxy)-2,2,2-trifluoroethane as colorless liquid in 65% yield (2.63 g).



**<sup>1</sup>H NMR (300 MHz, CDCl<sub>3</sub>):** δ 7.36-7.48 (m, 5H), 5.58(q, J<sup>H-F</sup> = 4.2 Hz, 1H), 5.02 (d, J<sup>H-H</sup> = 11.9 Hz, 1H), 4.70 (d, J<sup>H-H</sup> = 11.9 Hz, 1H). **<sup>13</sup>C NMR (75 MHz, CDCl<sub>3</sub>):** δ 134, 129.2, 129, 128.8, 121(q, J<sup>C-F</sup> = 279 Hz), 87(q, J<sup>C-F</sup> = 38.6 Hz), 72. **<sup>19</sup>F NMR (188 MHz, CDCl<sub>3</sub>):** δ -79.6 (d, J<sup>F-H</sup> = 4.1 Hz, 3F). **R<sub>f</sub>** = 0.20 (Hexane). **HRMS (ESI, MS+)** calcd. for [M+H] C<sub>9</sub>H<sub>9</sub>ClF<sub>3</sub>O, m/z: 225.0294, found: 225.0297.

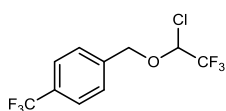

**1-chloro-1-(4-(trifluoromethyl)benzyloxy)-2,2,2-trifluoroethane (4b).**

The title compound was synthesized similarly to **4a** using 4.9 g (18 mmol) of 4-(trifluoromethyl)benzyl trifluoroacetate (**16a**). After purification by column chromatography (eluent: hexane), 1-chloro-1-benzyloxy-2,2,2-trifluoroethane was obtained as colorless liquid in 71% yield (3.12 g)

**<sup>1</sup>H NMR (300 MHz, CDCl<sub>3</sub>):** δ 7.67 (d, J<sup>H-H</sup> = 8 Hz, 2H), 7.5 (d, J<sup>H-H</sup> = 8 Hz, 2H), 5.62 (q, J<sup>H-F</sup> = 4.1 Hz, 1H), 5.06 (d, J<sup>H-H</sup> = 12.3 Hz, 1H), 4.76 (d, J<sup>H-H</sup> = 12.3 Hz, 1H). **<sup>13</sup>C NMR (75 MHz, CDCl<sub>3</sub>):** δ 138.3, 131.3(q, J<sup>C-F</sup> = 33 Hz), 128.5, 126 (q, J<sup>C-F</sup> = 3.8 Hz), 124(q, J<sup>C-F</sup> = 271 Hz), 120.9(q, J<sup>C-F</sup> = 278 Hz), 87.4(q, J<sup>C-F</sup> = 39 Hz), 71.3. **<sup>19</sup>F NMR (188 MHz, CDCl<sub>3</sub>):** δ -62.9 (s, 3F), -79.6 (d, J<sup>F-H</sup> = 4.1 Hz 3F). **R<sub>f</sub>** = 0.24 (Hexane). **HRMS (ESI, MS+)** calcd. for [M+H] C<sub>10</sub>H<sub>8</sub>ClF<sub>6</sub>O, m/z: 293.0168, found: 293.0162.

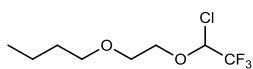

**1-chloro-1-(2-(butoxy)ethoxy)-2,2,2-trifluoroethane(4c).**

The mixture of 2-butoxy ethanol (1.18 g, 10 mmol), trifluoroacetaldehyde ethyl hemiacetal(1.92 g, 12 mmol) and 5 Å molecular sieves(10 g) in THF (20 ml) was stirred at the room temperature until no 2-butoxy ethanol was observed by <sup>1</sup>H NMR (ca. 5 days). Then molecular sieves were filtered off, solvent evaporated. The residue was dissolved in DCM (50 ml), combined with triphenyl phosphite (4.65 g, 4 ml, 15 mmol) and cooled to 0C with ice bath. To obtained vigorously stirred solution in small portions was added NCS (2.7 g, 20 mmol) in small portions (Caution! Very exothermic!). Reaction mixture was removed from ice bath and stirred for 5 minutes. To the reaction mixture was added ~50 g of silica, solvent evaporated. Obtained mixture was subjected to column chromatography (eluent: 1% to 3% EtOAc in hexane), giving 1-chloro-1-(2-(butoxy)ethoxy)-2,2,2-trifluoroethane as colorless liquid in 71% yield (2.5 g).

**<sup>1</sup>H NMR (300 MHz, CDCl<sub>3</sub>):** 5.88 (q, J<sup>H-F</sup> = 4.25 Hz, 1H), 3.94-4.05 (m, 1H), 3.94-4.05 (m, 1H), 3.82-3.95(m, 1H), 3.65-3.71 (m, 2H), 3.74(t, J<sup>H-H</sup>=6.6 Hz, 2H), 1.55(m, 2H), 1.35(m, 2H), 0.92(t, J<sup>H-H</sup> = 7.3 Hz). **<sup>13</sup>C NMR (75 MHz, CDCl<sub>3</sub>):** δ 121(q, J<sup>C-F</sup> = 280 Hz), 89.1(q, J<sup>C-F</sup> = 39 Hz), 71.3, 71.5, 70.1, 69.5, 31.8, 19.3, 14.0. **<sup>19</sup>F NMR (188 MHz, CDCl<sub>3</sub>):** -79.9 (d, J<sup>F-H</sup> = 4.3 Hz, 3F). **R<sub>f</sub>** = 0.2 (10% DCM/Hexane). **HRMS (ESI, MS+)** calcd. for [M+Na] C<sub>8</sub>H<sub>14</sub>ClF<sub>3</sub>O<sub>2</sub>Na, m/z: 257.0567, found: 257.0532.

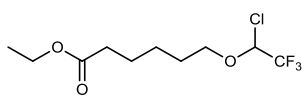

**Ethyl 6-(1-chloro-2,2,2-trifluoroethoxy)hexanoate (4d).**

The title compound was synthesized similarly to **4c**, using ethyl (6-hydroxy)hexanoate (1.6 g, 10 mmol). After column chromatography (eluent: 0.5%to 3% EtOAc in

hexane), Ethyl 6-(1-chloro-2,2,2-trifluoroethoxy)hexanoate was obtained as colorless liquid in 82% (2.25 g).

**<sup>1</sup>H NMR (300 MHz, CDCl<sub>3</sub>):** 5.62 (q,  $J^{H-F}$  = 4.1 Hz, 1H), 4.13 (q,  $J^{H-H}$  = 7.2 Hz, 2H), 3.96 (dt,  $J^{H-H}$  = 9.2 Hz, 6.4 Hz, 1H), 3.6 (dt,  $J^{H-H}$  = 9.2 Hz, 6.4 Hz, 1H), 2.31, (t,  $J^{H-H}$  = 7.3 Hz, 2H) 1.59-1.76 (m, 4H), 1.36-1.49(m, 2H), 1.25 (t,  $J^{H-H}$  = 7.1 Hz, 3H). **<sup>13</sup>C NMR (75 MHz, CDCl<sub>3</sub>):**  $\delta$  173.6, 120.9(q,  $J^{C-F}$  = 279 Hz), 88.9(q,  $J^{C-F}$  = 39 Hz), 71.4, 60.4, 34.2, 28.5, 25.4, 24.6, 14.4. **<sup>19</sup>F NMR (188 MHz, CDCl<sub>3</sub>):** -79.9 (d,  $J^{F-H}$  = 4.3 Hz, 3F). **R<sub>f</sub>** = 0.2 (30% DCM/Hexane). **HRMS (ESI, MS+)** calcd. for [M+H] C<sub>10</sub>H<sub>17</sub>ClF<sub>3</sub>O<sub>3</sub>, m/z: 277.0834, found: 277.0818.

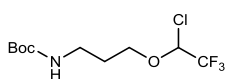

1-chloro-1-(3-(N-Bocamino)propoxy)-2,2,2-trifluoroethane(4e).

The title compound was synthesized similarly to **4d**, using 3-(N-Bocamino)propanol (1.75 g, 10 mmol). After column chromatography (eluent: 5% to 12% EtOAc in hexane), 1-chloro-1-(3-(N-Bocamino)propoxy)-2,2,2-trifluoroethane was obtained as colorless oil in 54% (1.57 g).

**<sup>1</sup>H NMR (300 MHz, CDCl<sub>3</sub>):** 5.64 (q,  $J^{H-F}$  = 4.1Hz, 1H), 4.64 (bs, 1H), 3.03 (dt,  $J^{H-H}$  = 9.6 Hz, 6.1 Hz, 1H), 3.69 (dt,  $J^{H-H}$  = 9.2 Hz, 6.4 Hz, 1H), 3.13-3.33 (m, 2H), 1.81-1.93 (m, 2H), 1.36-1.49 (m, 2H), 1.44 (s, 9H). **<sup>13</sup>C NMR (75 MHz, CDCl<sub>3</sub>):**  $\delta$  159.1, 120.9 (q,  $J^{C-F}$  = 279 Hz), 88.5 (q,  $J^{C-F}$  = 38.5 Hz), 69.4, 37.6, 29.3, 28.5. **<sup>19</sup>F NMR (188 MHz, CDCl<sub>3</sub>):** -79.8 (d,  $J^{F-H}$  = 4.1 Hz 3F). **R<sub>f</sub>** = 0.18 (10% EtOAc in Hexane). **HRMS (ESI, MS+)** calcd for [M+H] C<sub>10</sub>H<sub>18</sub>ClF<sub>3</sub>NO<sub>3</sub>, m/z: 292.0922. found: 292.0996 .

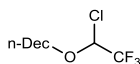

1-chloro-1-decyloxy-2,2,2-trifluoroethane(4f).

The title compound was synthesized similarly to **4a** using 4.08 g (18 mmol) *n*-decyl trifluoroacetate. After purification by column chromatography (eluent: hexane), 1-chloro-1-benzyloxy-2,2,2-trifluoroethane was obtained as colorless liquid in 76% yield (4.4 g).

**<sup>1</sup>H NMR (300 MHz, CDCl<sub>3</sub>):** 5.62(q,  $J^{H-F}$  = 4.1 Hz, 1H), 3.96 (dt,  $J^{H-H}$  = 9.3 Hz, 6.7 Hz, 1H), 3.61 (dt,  $J^{H-H}$  = 9.3 Hz, 6.4 Hz, 1H), 1.67 (m, 2H), 1.16-1.42 (m, 14H), 0.88 (t,  $J^{H-H}$  = 6.5 Hz, 3H). **<sup>13</sup>C NMR (75 MHz, CDCl<sub>3</sub>):**  $\delta$  120.9 (q,  $J^{C-F}$  = 279 Hz), 88.9 (q,  $J^{C-F}$  = 39.1 Hz), 71.9, 32, 29.65, 29.6, 29.4, 29.3, 28.7, 25.8, 22.8, 14.3. **<sup>19</sup>F NMR (188 MHz, CDCl<sub>3</sub>):** -79.9 (d,  $J^{F-H}$  = 4.1 Hz, 3F). **R<sub>f</sub>** = 0.61 (Hexane). **HRMS (ESI, -MS)** calcd for [M-H] C<sub>12</sub>H<sub>23</sub>ClF<sub>3</sub>O, m/z: 274.1311, found: 274.1318.

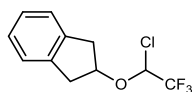

1-chloro-1-(2-indanoxy)-2,2,2-trifluoroethane(4g).

The title compound was synthesized similarly to **4a** using 2.3 g (10 mmol) of 4-(trifluoromethyl)benzyl trifluoroacetate (**16e**). After purification by column chromatography (eluent: hexane), 1-chloro-1-(2-indanoxy)-2,2,2-trifluoroethane was obtained as colorless liquid in 65% yield (1.52 g).

**<sup>1</sup>H NMR (400 MHz, CDCl<sub>3</sub>):**  $\delta$  7.16-7.26 (m, 4H), 5.76 (q,  $J^{H-F}$  = 4.3 Hz, 1H), 4.82 (tt,  $J^{H-H}$  = 6.6 Hz, 4.5 Hz, 1H), 3.33 (dd,  $J^{H-H}$  = 16.6 Hz, 6.7 Hz, 1H), 3.27 (dd,  $J^{H-H}$  = 16.3 Hz, 6.7 Hz, 1H), 3.2(dd,  $J^{H-H}$  = 16.6

Hz, 4.3 Hz, 1H), 3.06 (dd,  $J^{H-H} = 16.4$  Hz, 4.3 Hz, 1H).  $^{13}\text{C}$  NMR (100 MHz,  $\text{CDCl}_3$ ):  $\delta$  140, 139.1, 127.3, 127.1, 124.81, 124.77, 120.9 (q,  $J^{C-F} = 280$  Hz), 87.7 (q,  $J^{C-F} = 39$  Hz), 82, 39.6, 38.5.  $^{19}\text{F}$  NMR (188 MHz,  $\text{CDCl}_3$ ):  $\delta$  -79.9 (d,  $J^{F-H} = 4.3$  Hz 3F).  $R_f = 0.31$  (Hexane). HRMS (ES MS-) calcd. for  $[\text{M-H}] \text{C}_{11}\text{H}_{10}\text{ClF}_3\text{O}$ ,  $m/z$ : 249.0294, found: 249.0290.

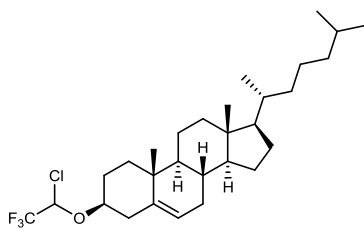

1-chloro-1-(cholesteryloxy)-2,2,2-trifluoroethane (mixture of diastereomers) (**4h**).

The title compound was synthesized similarly to **4a** using 4 g of (5 mmol) cholesteryl trifluoroacetate (**16f**). After purification by column chromatography (eluent: hexane), 1-chloro-1-benzyloxy-2,2,2-trifluoroethane was obtained as white solid in

70% yield (850 mg).

$^1\text{H}$  NMR (500 MHz,  $\text{CDCl}_3$ ):  $\delta$  5.75 (m, 1H), 5.41 (m, 1H), 3.70 (m, 1H), 2.25-2.45 (m, 1H), 1.87-2.06 (m, 4H), 1.79-1.87 (m, 1H), 1.43-1.73 (m, 7H), 1.21-1.41 (m, 4H), 1.02-1.2 (m, 7H), 1.01 (s, 3H), 0.935-1.00 (m, 2H), 0.91 (d,  $J^{H-H} = 6.6$  Hz, 3H), 0.87 (d,  $J^{H-H} = 6.6$  Hz, 3H), 0.86 (d,  $J^{H-H} = 6.6$  Hz, 3H), 0.68 (s, 3H).  $^{13}\text{C}$  NMR (125 MHz,  $\text{CDCl}_3$ ):  $\delta$  139.5, 139.2, 123.3, 123.2, 121.05 (q,  $J^{C-F} = 280$  Hz), 121.03 (q,  $J^{C-F} = 280$  Hz), 86.85 (q,  $J^{C-F} = 38$  Hz), 86.79 (q,  $J^{C-F} = 38$  Hz), 81, 80.9, 56.84, 56.83, 56.27, 50.20, 50.15, 42.5, 39.8, 39.7, 38.9, 37.6, 37.1, 35.84, 36.83, 36.76, 36.3, 36, 32.07, 32.04, 31.96, 28.6, 28.4, 28.2, 27, 24.4, 24, 23, 22.7, 21.21, 21.19, 19.4, 18.9, 12.  $^{19}\text{F}$  NMR (188 MHz,  $\text{CDCl}_3$ ):  $\delta$  -80.0 (d,  $J^{F-H} = 4.3$  Hz, 3F).  $R_f = 0.49$  (Hexane). HRMS (ES MS+) calcd. for  $[\text{M+H}] \text{C}_{29}\text{H}_{47}\text{ClF}_3\text{O}$ ,  $m/z$ : 503.3268, found: 503.3215.

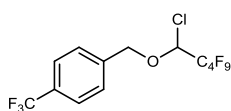

1-chloro-1-(4-trifluoromethyl)benzyloxy-1H-perfluoropentane (**4i**).

The title compound was synthesized similarly to **4b** using 4.2 g (10 mmol) of 4-(trifluoromethyl)benzyl perfluoropentanoate (**16b**). After purification by column chromatography (eluent: hexane), 1-chloro-1-benzyloxy-2,2,2-trifluoroethane was obtained as colorless liquid in 61% yield (2.7 g).

$^1\text{H}$  NMR (400 MHz,  $\text{CDCl}_3$ ): 7.58 (d,  $J^{H-H} = 8.2$  Hz, 2H), 7.39 (d,  $J^{H-H} = 8.2$  Hz, 2H), 5.78 (dm,  $J^{H-F} = 13.6$  Hz, 1H), 4.99 (d,  $J^{H-H} = 11.9$  Hz, 1H), 4.66 (d,  $J^{H-H} = 11.9$  Hz, 1H).  $^{13}\text{C}$  NMR (100 MHz,  $\text{CDCl}_3$ ):  $\delta$  137.9, 131.3 (q,  $J^{C-F} = 32.5$  Hz), 125.8, 126 (q,  $J^{C-F} = 3.8$  Hz), 124 (q,  $J^{C-F} = 272$  Hz), 88.9 (dd,  $J^{C-F} = 34.8$  Hz, 23.6 Hz), 71.7. Signals for carbons of the perfluoroalkyl group were not observed.  $^{19}\text{F}$  NMR (188 MHz,  $\text{CDCl}_3$ ): -62.9 (s, 3F), -80.9 (t,  $J^{F-F} = 9.6$  Hz, 3F), -116.3 (dm,  $J^{F-F} = 283$  Hz, 1F( $\alpha$ -F)), -120.9 (dm,  $J^{F-F} = 300$  Hz, 1F( $\gamma$ -F)), -123.4 (dm,  $J^{F-F} = 300$  Hz, 1F( $\nu$ -F)), -125.1 (dm,  $J^{F-F} = 291$  Hz, 1F( $\beta$ -F)), -125.8 (dm,  $J^{F-F} = 285.1$  Hz, 1F( $\alpha$ -F)), -127.8 (dm,  $J^{F-F} = 291$  Hz, 1F( $\beta$ -F)).  $R_f = 0.33$  (Hexane). HRMS (APCI, -MS) calcd. for  $[\text{M-H}] \text{C}_{13}\text{H}_6\text{ClF}_{12}\text{O}$ ,  $m/z$ : 440.9916, found: 442.0021.

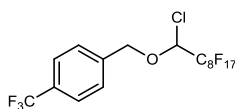

1-chloro-1-(4-trifluoromethyl)benzyloxy-1H-perfluorononane (**4j**).

The title compound was synthesized similarly to **4a** using 3.0 g (4.9 mmol) 4-(trifluoromethyl)benzyl perfluorononanoate (**16c**). After purification by

column chromatography (eluent: hexane), 1-chloro-1-benzyloxy-2,2,2-trifluoroethane was obtained as colorless liquid in 58% yield (1.8 g).

**<sup>1</sup>H NMR (300 MHz, CDCl<sub>3</sub>):** 7.66 (d,  $J^{\text{H-H}} = 8.1$  Hz, 2H), 7.47 (d,  $J^{\text{H-H}} = 8.2$  Hz, 2H), 5.86 (dm,  $J^{\text{H-F}} = 13.9$  Hz, 1H), 5.07 (d,  $J^{\text{H-H}} = 12$  Hz, 1H), 4.75 (d,  $J^{\text{H-H}} = 12$  Hz, 1H). **<sup>13</sup>C NMR (151 MHz, CDCl<sub>3</sub>):**  $\delta$  137.9 (q,  $J^{\text{C-F}} = 1.2$  Hz), 132.8 (q,  $J^{\text{C-F}} = 32.6$  Hz), 128.6, 125.9 (q,  $J^{\text{C-F}} = 3.9$  Hz), 124.0 (q,  $J^{\text{C-F}} = 272$  Hz), 88.9 (dd,  $J^{\text{C-F}} = 35$  Hz, 24 Hz), 71.7. *Signals for carbons of the perfluoroalkyl group were not observed.* **<sup>19</sup>F NMR (188 MHz, CDCl<sub>3</sub>):** -63.0 (s, 3F), -80.9 (t,  $J^{\text{F-F}} = 9.8$  Hz, 3F), -116.3 (dm,  $J^{\text{F-F}} = 284$  Hz, 1F), -120 – -124 (m, 10F), -125.4 (dm,  $J^{\text{F-F}} = 284$  Hz, 1F), -125.7 (dm,  $J^{\text{F-F}} = 297$  Hz, 1F), -126.7 (dm,  $J^{\text{F-F}} = 297$  Hz, 1F).  $R_f = 0.34$  (Hexane). **HRMS (APCI, MS-)** calcd. for C<sub>17</sub>H<sub>6</sub>ClF<sub>20</sub>O [M-H], m/z: 641.9872, found: 641.9856.

### Preparation of trimethoxy(aryl)silanes

**Procedure A:** a procedure was adapted from the literature as follow: 20 ml (~1 M) of a solution of aryl Grignard reagent in THF (prepared from 20 mmol (1 eq.) of the corresponding arylbromide and 530 mg, 22 mmol (1.1 eq.) of magnesium turnings by heating at 50°C for 3h.) was dropwise added to the ice-cold solution of 6 ml (2 eq.) tetramethylorthosilicate in hexanes (80 ml). The resulting mixture was stirred for 20h at room temperature. The obtained suspension was filtered through sintered glass filter, solvent removed under reduced pressure and the residue was purified by bulb-to-bulb distillation.

**Procedure B:** a procedure was adapted from literature<sup>6</sup> as follows: In a glovebox, a Schlenk tube was sequentially charged with [Rh(cod)(MeCN)<sub>2</sub>]BF<sub>4</sub> (44 mg, 0.14 mmol, 2 mol%), DMF (7 ml), (hetero)aryl bromide (or iodide, 7 mmol, 1 eq.), tetrabutylammonium iodide (in case of aryl bromide is used, 2.6 g, 1 eq.), triethylamine (3 ml, 21 mmol, 3 eq.) and trimethoxysilane (1.35 ml, 10.5 mmol, 1.5 eq.). The mixture was heated at 80 °C for 3 h. Upon completion, volatiles and solvent were removed under reduced pressure; residue was dissolved in small amount of dichloromethane (*c.a.* 5 ml) and 100 ml of diethyl ether was added. Obtained mixture was filtered, concentrated under reduced pressure and subjected to bulb-to-bulb distillation.

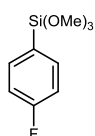

**Trimethoxy(4-fluorophenyl)silane (17a):** following a procedure **A**, 2.2 ml (20 mmol) of 1-bromo-4-fluorobenzene was used for the preparation of Grignard reagent. Product was obtained as colorless liquid, 1.51 g (31% yield).

Spectroscopic data corresponds to the previously reported.<sup>7</sup>

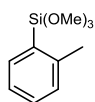

**Trimethoxy(2-methylphenyl)silane (17b):** following a procedure **A**, 2.4 ml (20 mmol) of 2-bromotoluene was used for the preparation of Grignard reagent. Product was obtained as colorless liquid, 1.53 g (36% yield).

Spectroscopic data corresponds to the previously reported.<sup>8</sup>

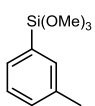

Trimethoxy(3-methylphenyl)silane(17c): following a procedure **A**, 2.4 ml (20 mmol) of 3-bromotoluene was used for the preparation of Grignard reagent. Product was obtained as a colorless liquid, 1.6 g (38% yield).

**<sup>1</sup>H NMR (600 MHz, CDCl<sub>3</sub>)**: δ 7.47 (m, 1H), 7.44 (m, 1H), 7.26-7.31(m, 2H), 3.63(s, 9H), 2.37(s, 3H). **<sup>13</sup>C NMR (125 MHz, CDCl<sub>3</sub>)**: δ 137.6, 135.4, 131.9, 131.6, 129.3, 128.1, 51.0, 21.6. **<sup>29</sup>Si NMR (79 MHz, CDCl<sub>3</sub>)**: δ -54.2.

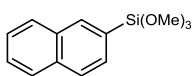

Trimethoxy(2-naphthyl)silane(17d): following a procedure **A**, 4.14 g (20 mmol) of 2-bromonaphthalene was used for the preparation of Grignard reagent. Product was obtained as colorless liquid, 1.84 g (35% yield).

**<sup>1</sup>H NMR (300 MHz, CDCl<sub>3</sub>)**: δ 8.21 (s, 1H), 7.71-7.93 (m, 3H), 7.69(m, 1H), 7.46-7.57(m, 2H), 3.62(s, 9H), 2.49(s, 3H). **<sup>13</sup>C NMR (100 MHz, CDCl<sub>3</sub>)**: δ 138.5, 132.8, 131.4, 130.4, 129.0, 51.0, 16.0. **<sup>29</sup>Si NMR (79 MHz, CDCl<sub>3</sub>)**: δ -55.1.

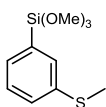

Trimethoxy(3-thiomethoxyphenyl)silane(17e): following a procedure **A**, 2.7 ml (20 mmol) of 3-bromothioanisole was used for the preparation of Grignard reagent. Product was obtained as colorless liquid, 1.58 g (33% yield).

**<sup>1</sup>H NMR (300 MHz, CDCl<sub>3</sub>)**: δ 7.53 (m, 1H), 7.37-7.44 (m, 1H), 7.27-7.37(m, 2H), 3.67(m, 9H). **<sup>13</sup>C NMR (100 MHz, CDCl<sub>3</sub>)**: δ 136.5, 134.6, 133.0, 130.3, 128.6, 127.9, 127.5, 127.1, 126.9, 126.2, 51.1. **<sup>29</sup>Si NMR (79 MHz, CDCl<sub>3</sub>)**: δ -54.1.

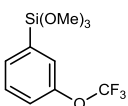

Trimethoxy(3-(trifluoromethoxy)phenyl)silane(17f): following a procedure **A**, 3 ml (20 mmol) of 3-(trifluoromethoxy)bromobenzene was used for the preparation of Grignard reagent. Product was obtained as colorless liquid, 1.35 g (24% yield).

**<sup>1</sup>H NMR (300 MHz, CDCl<sub>3</sub>)**: δ 7.56 (dm,  $J^{H-H} = 7.3$  Hz, 1H), 7.48 (m, 1H), 7.43 (dd,  $J^{H-H} = 8.1$  Hz, 7.3 Hz, 1H), 7.3 (dm,  $J^{H-H} = 8.1$  Hz, 1H), 3.63(s, 9H). **<sup>13</sup>C NMR (100 MHz, CDCl<sub>3</sub>)**: δ 149.3(q,  $J^{C-F} = 1$  Hz), 133.2, 132.6, 129.8, 127.1, 123.3, 120.6(q,  $J^{C-F} = 257$  Hz). **<sup>29</sup>Si NMR (79 MHz, CDCl<sub>3</sub>)**: δ -56.5. **<sup>19</sup>F NMR (376 MHz, CDCl<sub>3</sub>)**: δ -57.9 (s, 3F).

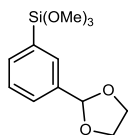

Trimethoxy(3-(1,3-dioxolan-2-yl)phenyl)silane(17g): following a procedure **A**, 4.6 g (20 mmol) of 3-(1,3-dioxolan-2-yl)bromobenzene was used for the preparation of Grignard reagent. Product was obtained as colorless liquid (2.2 g, 41% yield).

**<sup>1</sup>H NMR (400 MHz, CDCl<sub>3</sub>)**: δ 7.76(m, 1H), 7.66(dt,  $J^{H-H} = 7.3$  Hz, 1.2Hz, 1H), 7.58(dt,  $J^{H-H} = 7.8$  Hz, 1.5 Hz, 1H), 7.42(dd,  $J^{H-H} = 7.8$  Hz, 7.3 Hz, 1H), 5.82(s, 1H), 4.09-4.17(m, 2H), 4.0-4.09(m, 2H), 3.62(s, 9H). **<sup>13</sup>C NMR (100 MHz, CDCl<sub>3</sub>)**: δ 137.5, 135.8, 133.1, 129.7, 128.9, 128.2, 103.9, 65.5, 51. **<sup>29</sup>Si NMR (79 MHz, CDCl<sub>3</sub>)**: δ -54.8.

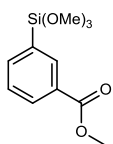

Methyl 3-(trimethoxysilyl)benzoate(17h): following a procedure **B**, using 1.5 g of methyl 3-bromobenzoate. Product was obtained as colorless oil (0.99 g, 56% yield).

$^1\text{H NMR}$  (400 MHz,  $\text{CDCl}_3$ ):  $\delta$  8.33(m, 1H), 8.12(dt,  $J^{\text{H-H}} = 7.8$  Hz, 1.6 Hz, 1H), 7.84(dt,  $J^{\text{H-H}} = 7.3$  Hz, 1.1 Hz, 1H), 7.48(m, 1H), 3.92(s, 3H), 3.64(s, 9H).  $^{13}\text{C NMR}$  (100 MHz,  $\text{CDCl}_3$ ):  $\delta$  167.2, 139.3, 136, 131.9, 130.3, 129.9, 128.2, 55.3, 51.1.  $^{29}\text{Si NMR}$  (79 MHz,  $\text{CDCl}_3$ ):  $\delta$  -55.7.

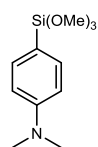

Trimethoxy(4-dimethylaminophenyl) silane(17i): following a procedure **B**, using 1.73 g of 4-(dimethylamino)iodobenzene. Product was obtained as white solid (m.p. = 23-27 °C), 423 mg (25% yield).

$^1\text{H NMR}$  (500 MHz,  $\text{CDCl}_3$ ):  $\delta$  7.51(d,  $J^{\text{H-H}} = 8.6$  Hz, 2H), 6.73(d,  $J^{\text{H-H}} = 8.6$  Hz, 2H), 3.60(s, 9H), 2.98(s, 6H).  $^{13}\text{C NMR}$  (125 MHz,  $\text{CDCl}_3$ ):  $\delta$  152.1, 136.2, 131.9, 111.8, 50.9, 40.15.  $^{29}\text{Si NMR}$  (99 MHz,  $\text{CDCl}_3$ ):  $\delta$  -51.7.

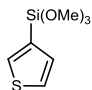

Trimethoxy(3-thienyl) silane(17j): following a procedure **A**, Grignard reagent was prepared by bromine-magnesium exchange of 3-bromothiophene (0.94 ml, 1.63 g, 10 mmol) with *i*PrMgBr-LiCl<sup>9</sup>. Product was obtained as colorless oil (702 mg, 34% yield).

$^1\text{H NMR}$  (400 MHz,  $\text{CDCl}_3$ ):  $\delta$  7.75(dd,  $J^{\text{H-H}} = 2.6$  Hz, 1.1 Hz, 1H), 7.43(dd,  $J^{\text{H-H}} = 4.8$  Hz, 2.6 Hz, 1H), 7.28 (dd,  $J^{\text{H-H}} = 4.8$  Hz, 2.6 Hz, 1H), 3.62 (s, 9H).  $^{13}\text{C NMR}$  (100 MHz,  $\text{CDCl}_3$ ):  $\delta$  136, 131.8, 130.1, 126.2, 50.9.  $^{29}\text{Si NMR}$  (79 MHz,  $\text{CDCl}_3$ ):  $\delta$  -56.5.

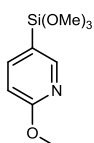

Trimethoxy(2-methoxypyrid-5-yl) silane(17k): following a procedure **B**, using 1.32 g of 5-bromo-2-methoxypyridine. Product was obtained as colorless oil (762 mg, 48% yield).

$^1\text{H NMR}$  (400 MHz,  $\text{CDCl}_3$ ):  $\delta$  8.39(m, 1H), 7.78(dd,  $J^{\text{H-H}} = 8.3$  Hz, 1.9 Hz, 1H), 6.77(dd,  $J^{\text{H-H}} = 8.3$  Hz, 0.7Hz, 1H), 3.69(s, 3H), 3.62(s, 9H).  $^{13}\text{C NMR}$  (100 MHz,  $\text{CDCl}_3$ ):  $\delta$  165.8, 153.7, 144.7, 116.5, 111.1, 53.5, 51.  $^{29}\text{Si NMR}$  (79 MHz,  $\text{CDCl}_3$ ):  $\delta$  -54.2.

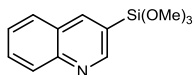

Trimethoxy(3-quinolinyl) silane(17l): following a procedure **B**, using 1.46 g of 3-bromoquinoline. Product was obtained as yellowish oil (793 mg, 45% yield).

$^1\text{H NMR}$  (400 MHz,  $\text{CDCl}_3$ ):  $\delta$  9.07(d,  $J^{\text{H-H}} = 1.7$  Hz, 1H), 8.49(m, 1H), 8.12(d,  $J^{\text{H-H}} = 8.4$  Hz, 1H), 7.85(ddd,  $J^{\text{H-H}} = 8.4$  Hz, 6.9 Hz, 1.5 Hz, 1H), 7.57(m, 1H), 3.69(s, 3H), 3.62(s, 9H).  $^{13}\text{C NMR}$  (100 MHz,  $\text{CDCl}_3$ ):  $\delta$  154.2, 149.1, 144.8, 130.7, 129.6, 128.3, 127.7, 126.8, 122.8, 51.1.  $^{29}\text{Si NMR}$  (79 MHz,  $\text{CDCl}_3$ ):  $\delta$  -55.8.

### Preparation of trimethoxy(alkenyl) silanes

(2-phenylvinyl)- and (1-octenylvinyl)trimethoxysilanes were synthesized by hydrosilylation reaction of phenylacetylene and octyne-1 respectively<sup>10</sup> followed by further methanolysis of corresponding (vinyl)trichlorosilanes<sup>11</sup> by known procedures.

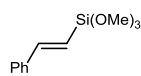

**(E)-2-phenylvinyltrimethoxysilane (17m):** 2.2 ml (2.04g, 20 mmol) of phenylacetylene was used. Short path distillation afforded the title compound as a colorless liquid in 2.06 g (9.2 mmol, 46% yield after two steps). Spectroscopic data corresponds to the previously reported.

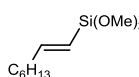

**(E)-trimethoxy(oct-1-en-1-yl)silane (17n):** 3 ml (2.2 g, 20 mmol) of octyne-1 used. Short path distillation afforded the title compound as a colorless liquid in 2.4 g (10.4 mmol, 52% yield after two steps). Note: some amount of (E)-trimethoxy(oct-1-en-2-yl)silane was obtained as a byproduct during hydrosilylation reaction, which does not interfere the reaction.

**<sup>1</sup>H NMR (400 MHz, CDCl<sub>3</sub>):**  $\delta$  6.45 (dd,  $J^{H-H}$  = 18.8 Hz, 6.4 Hz, 1H), 5.38 (dd,  $J^{H-H}$  = 1.4 Hz, 18.8 Hz, 1H), 3.57 (s, 1H), 2.17 (m, 2 H), 1.42(m, 2H), 1.29(m, 6H), 0.88(m, 3H). **<sup>13</sup>C NMR (100 MHz, CDCl<sub>3</sub>):**  $\delta$  155.1, 117.1, 50.7, 36.8, 31.8, 29.0, 29.3, 22.7, 14.8. **<sup>29</sup>Si NMR (79 MHz, CDCl<sub>3</sub>):**  $\delta$  -53.5.

### General Procedure for the Cross-coupling Reaction

In the glovebox, in 20 ml glass vial, mixture of NiCl<sub>2</sub>·glyme (22 mg, 0.1 mmol) and ligand **7a** (50.5 mg, 0.11 mmol) in dry DMA (5 ml) were stirred for 1h. The obtained solution of catalyst was diluted with DMA (5 ml), then TBAT (1.35 g, 2.5 mmol) and trimethoxy(aryl) silane (1.3 mmol) were added to the vial, followed by the solution of the electrophile **4b** (293.6 mg, 1 mmol) in 5 ml of DMA. The vial was tightly closed with PVC tape and stirred outside of the glovebox with additional light irradiation (household white-light 10W LED lamp or blue-light 10W LED lamp with  $\lambda_{em} \approx 460$  nm) for 16h. After completion of the reaction, a solution was poured into 15 ml 0.5M NaOH solution and stirred for additional 10 minutes. The obtained mixture was diluted with 45 ml of water and extracted with ether (3×20 ml). Combined organic fractions were washed with 10 ml of water, 10 ml of brine and dried over Na<sub>2</sub>SO<sub>4</sub>. The residue after solvent evaporation was subjected to column chromatography (silica gel, 230-400 mesh, hexane/DCM or hexane/EtOAc).

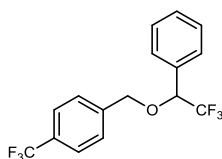

**1-phenyl-1-(4-trifluoromethyl)benzyloxy-2,2,2-trifluoroethane (6a).**

Used 258 mg (243  $\mu$ l) of trimethoxy(phenyl) silane. Product isolated as colorless oil.

**Run 1:** 310 mg, 93% yield (96% by <sup>19</sup>F NMR), 97% ee. **Run 2:** 308 mg, 93% yield (96% by <sup>19</sup>F NMR), 97% ee.

**<sup>1</sup>H NMR (500 MHz, CDCl<sub>3</sub>):** δ 7.62(d, J<sup>H-H</sup>= 8.2Hz, 2H), 7.48-7.40(m, 7H), 4.71(d, J<sup>H-H</sup>= 12.5Hz, 1H), 4.66(q, J<sup>H-H</sup> = 6.4Hz, 1H), 4.55(d, J<sup>H-H</sup>= 12.5Hz, 1H). **<sup>13</sup>C NMR (125 MHz, CDCl<sub>3</sub>):** δ 140.8, 132.3, 130.4(q, J<sup>C-F</sup>= 33 Hz), 129.9, 128.9, 128.5, 127.9, 125.7 (q, J<sup>C-F</sup>= 3.8 Hz), 124.2(q, J<sup>C-F</sup>= 272 Hz), 123.9(q, J<sup>C-F</sup>= 281 Hz), 79.2(q, J<sup>C-F</sup>= 32 Hz), 70.9. **<sup>19</sup>F NMR (188 MHz, CDCl<sub>3</sub>):** δ -62.8 (s, 3F), -76.6 (d, J<sup>F-H</sup> = 6.9 Hz 3F). **R<sub>f</sub>** = 0.36 (10% DCM/Hexane). **HRMS**(APCI, -MS) calcd. for C<sub>16</sub>H<sub>11</sub>F<sub>6</sub>O [M-H] m/z: 333.0714, found: 333.0786. **HPLC:** Daicel CHIRALPAK OJ-H column, 7% IPA/Hexane, flow 0.75ml/min; (4R,5S)-ligand: 17.9 min (major), 36.8 min (minor).

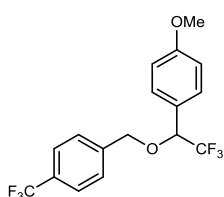

1-(4-methoxyphenyl)-1-(4-trifluoromethyl)benzyloxy-2,2,2-trifluoroethane(6b).

Used 297 mg of (268 μl) trimethoxy(4-methoxyphenyl) silane. Product isolated as colorless oil.

**Run 1:** 332 mg, 91% yield (95% by <sup>19</sup>F NMR), 97% ee. **Run 2:** 336 mg, 92% yield (94% by <sup>19</sup>F NMR), 97% ee.

**<sup>1</sup>H NMR (300 MHz, CDCl<sub>3</sub>):** δ 7.62(d, J<sup>H-H</sup>= 8.3 Hz, 2H), 7.44(d, J<sup>H-H</sup>= 8.3 Hz, 2H), 7.37(d, J<sup>H-H</sup>= 8.6 Hz, 2H), 6.95(d, J<sup>H-H</sup>= 8.6 Hz, 2H), 4.69 (d, J<sup>H-H</sup>= 12.4 Hz, 1H), 4.61(q, J<sup>H-H</sup>= 6.6 Hz, 1H), 4.51(d, J<sup>H-H</sup>= 12.4 Hz, 1H). **<sup>13</sup>C NMR (75 MHz, CDCl<sub>3</sub>):** δ 160.9, 141, 130.4(q, J<sup>C-F</sup>= 33 Hz), 129.8, 127.9, 125.6(q, J<sup>C-F</sup>= 3.4 Hz), 124.2(q, J<sup>C-F</sup>= 271 Hz), 124.1, 123.9(q, J<sup>C-F</sup>= 281 Hz), 114.3, 78.8(q, J<sup>C-F</sup>= 32 Hz), 70.6, 55.5. **<sup>19</sup>F NMR (188 MHz, CDCl<sub>3</sub>):** δ -62.8 (s, 3F), -76.8 (d, J<sup>F-H</sup> = 6.6 Hz 3F). **R<sub>f</sub>** = 0.17 (10% DCM/hexane). **HRMS**(APCI, +MS) calcd. for C<sub>17</sub>H<sub>14</sub>F<sub>6</sub>O<sub>2</sub> [M+] m/z: 364.0893, found: 364.0910. **HPLC:** Daicel CHIRALPAK OJ-H column, 7% IPA/Hexane, flow 0.75ml/min; (4R,5S)-ligand: 17.6 min (major), 33.1 min (minor).

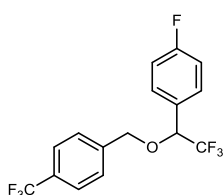

1-(4-fluorophenyl)-1-(4-trifluoromethyl)benzyloxy-2,2,2-trifluoroethane(6c).

Used 281 mg of trimethoxy(4-fluorophenyl) silane. Product isolated as colorless oil.

**Run 1:** 323 mg, 90% yield (95% by <sup>19</sup>F NMR), 96% ee. **Run 2:** 326 mg, 93% yield (96 by <sup>19</sup>F NMR), 96% ee.

**<sup>1</sup>H NMR (300 MHz, CDCl<sub>3</sub>):** δ 7.62(d, J<sup>H-H</sup>= 8.1 Hz, 2H), 7.47-7.40 (m, 4H), 7.12 (m, 2H), 7.24(d, J<sup>H-H</sup>= 8.1 Hz, 2H), 4.71 (d, J<sup>H-H</sup>= 12.4 Hz, 1H), 4.66(q, J<sup>H-H</sup>= 6.2 Hz, 1H), 4.55(d, J<sup>H-H</sup>= 12.4 Hz, 1H). **<sup>13</sup>C NMR (75 MHz, CDCl<sub>3</sub>):** δ 165.2(d, J<sup>C-F</sup>= 249 Hz), 140.6, 131.2(q, J<sup>C-F</sup>= 33 Hz), 130.3(d, J<sup>C-F</sup>= 8 Hz), 128.1, 127.9, 125.7(q, J<sup>C-F</sup>= 4 Hz), 124.2(q, J<sup>C-F</sup>= 272 Hz), 123.7(q, J<sup>C-F</sup>= 281 Hz), 116(d, J<sup>C-F</sup>= 22 Hz) 78.5(q, J<sup>C-F</sup>= 32 Hz), 71. **<sup>19</sup>F NMR (188 MHz, CDCl<sub>3</sub>):** δ -62.8 (s, 3F), -76.8 (d, J<sup>F-H</sup> = 6.2 Hz 3F), -111.4(m, 1H). **R<sub>f</sub>** = 0.36 (10% DCM/Hexane). **HRMS**(APCI, -MS) calcd. for C<sub>16</sub>H<sub>10</sub>F<sub>7</sub>O [M-H] m/z: 351.0609, found: 351.0620. **HPLC:** Daicel CHIRALPAK OJ-H column, 7% IPA/Hexane, flow 0.75ml/min; (4R,5S)-ligand: 13.1 min (major), 30 min (minor).



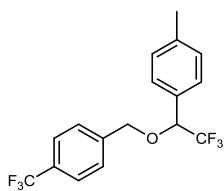

1-(p-tolyl)-1-(4-trifluoromethyl)benzyloxy-2,2,2-trifluoroethane (6d).

Used 276 mg (264  $\mu$ l) of trimethoxy(p-tolyl) silane. Product isolated as colorless oil.

**Run 1:** 324 mg, 93% yield (97% by  $^{19}\text{F}$  NMR), 96% *ee*. **Run 2:** 317 mg, 91% yield (95% by  $^{19}\text{F}$  NMR), 97% *ee*.

$^1\text{H}$  NMR (300 MHz,  $\text{CDCl}_3$ ):  $\delta$  7.61(d,  $J^{\text{H-H}} = 8.1$  Hz, 2H), 7.43(d,  $J^{\text{H-H}} = 8.1$  Hz, 2H), 7.33(d,  $J^{\text{H-H}} = 8.1$  Hz, 2H), 7.24(d,  $J^{\text{H-H}} = 8.1$  Hz, 2H), 4.69 (d,  $J^{\text{H-H}} = 12.4$  Hz, 1H), 4.63(q,  $J^{\text{H-H}} = 6.5$  Hz, 1H), 4.52(d,  $J^{\text{H-H}} = 12.4$  Hz, 1H), 2.39 (s, 3H).  $^{13}\text{C}$  NMR (75 MHz,  $\text{CDCl}_3$ ):  $\delta$  140.9, 140, 130.2, 129.6, 129.2, 128.4(q,  $J^{\text{C-F}} = 31$  Hz), 127.8, 125.6, 124.2(q,  $J^{\text{C-F}} = 271$  Hz), 123.9(q,  $J^{\text{C-F}} = 281$  Hz), 79.1(q,  $J^{\text{C-F}} = 32$  Hz), 70.6, 21.4  $^{19}\text{F}$  NMR (188 MHz,  $\text{CDCl}_3$ ):  $\delta$  -62.8 (s, 3F), -76.7 (d,  $J^{\text{F-H}} = 6.4$  Hz, 3F).  $R_f = 0.37$  (10% DCM/Hexane). HRMS(APCI, -MS) calcd. for  $\text{C}_{17}\text{H}_{13}\text{F}_6\text{O}$  [M-H]  $m/z$ : 347.0871, found: 347.0803. HPLC: Daicel CHIRALPAK OJ-H column, 7% IPA/Hexane, flow 0.75ml/min; (4R,5S)-ligand: 9.9 min (major), 25.2 min (minor).

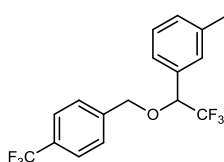

1-(m-tolyl)-1-(4-trifluoromethyl)benzyloxy-2,2,2-trifluoroethane (6e).

Used 276 mg (264  $\mu$ l) of trimethoxy(m-tolyl) silane. Product isolated as colorless oil.

**Run 1:** 317 mg, 91% yield (95% by  $^{19}\text{F}$  NMR), 96% *ee*. **Run 2:** 309 mg, 89% yield (94% by  $^{19}\text{F}$  NMR), 97% *ee*.

$^1\text{H}$  NMR (500 MHz,  $\text{CDCl}_3$ ):  $\delta$  7.65(d,  $J^{\text{H-H}} = 8$  Hz, 2H), 7.47(d,  $J^{\text{H-H}} = 8$  Hz, 2H), 7.37-7.32(m, 1H), 7.32-7.24(m, 3H), 4.73 (d,  $J^{\text{H-H}} = 12.6$  Hz, 1H), 4.66(q,  $J^{\text{H-H}} = 6.3$  Hz, 1H), 4.56(d,  $J^{\text{H-H}} = 12.6$  Hz, 1H), 2.42(s, 3H).  $^{13}\text{C}$  NMR (125 MHz,  $\text{CDCl}_3$ ):  $\delta$  140.9, 138.7, 132.2, 130.7, 130.4(q,  $J^{\text{C-F}} = 32$  Hz), 129.1, 128.8, 127.8, 125.65(q,  $J^{\text{C-F}} = 3.9$  Hz), 126, 124.2(q,  $J^{\text{C-F}} = 273$  Hz), 123.9(q,  $J^{\text{C-F}} = 281$  Hz), 79.2(q,  $J^{\text{C-F}} = 31$  Hz), 70.8, 21.5  $^{19}\text{F}$  NMR (188 MHz,  $\text{CDCl}_3$ ):  $\delta$  -62.8 (s, 3F), -76.5 (d,  $J^{\text{F-H}} = 6.5$  Hz, 3F).  $R_f = 0.36$  (10% DCM/Hexane). HRMS(APCI, -MS) calcd. for  $\text{C}_{17}\text{H}_{13}\text{F}_6\text{O}$  [M-H]  $m/z$ : 347.0871, found: 347.0803. HPLC: Daicel CHIRALPAK OJ-H column, 7% IPA/Hexane, flow 0.75ml/min; (4R,5S)-ligand: 10.4 min (major), 32.8 min (minor).

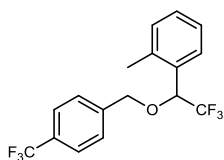

1-(o-tolyl)-1-(4-trifluoromethyl)benzyloxy-2,2,2-trifluoroethane (6f).

Used 276 mg (264  $\mu$ l) of trimethoxy(o-tolyl) silane. Note: reaction time 48h. Product isolated as colorless oil.

**Run 1:** 277 mg, 80% yield (83% by  $^{19}\text{F}$  NMR), 92% *ee*. **Run 2:** 275 mg, 79% yield (83% by  $^{19}\text{F}$  NMR), 92% *ee*.

$^1\text{H}$  NMR (300 MHz,  $\text{CDCl}_3$ ):  $\delta$  7.59-7.65(m, 3H), 7.43(d,  $J^{\text{H-H}} = 8.3$  Hz, 2H), 7.27-7.34(m, 2H), 7.32-7.24(m, 2H), 7.18-7.24(m, 1H), 4.98 (q,  $J^{\text{H-H}} = 6.5$  Hz, 1H), 4.69(d,  $J^{\text{H-H}} = 12.5$  Hz, 1H), 4.50(d,  $J^{\text{H-H}} = 12.6$  Hz, 1H), 2.28(s, 3H).  $^{13}\text{C}$  NMR (125 MHz,  $\text{CDCl}_3$ ):  $\delta$  140.9, 137.6, 130.9, 130.6,

130.5(q,  $J^{C-F} = 32$  Hz), 129.6, 128.1, 127.9, 125.7(q,  $J^{C-F} = 3.8$  Hz), 124.3(q,  $J^{C-F} = 282$  Hz), 124.2(q,  $J^{C-F} = 272$  Hz), 75(q,  $J^{C-F} = 31$  Hz), 70.7, 19.4(q,  $J^{C-F} = 1$  Hz)  **$^{19}F$  NMR (188 MHz,  $CDCl_3$ ):**  $\delta$  -62.8 (s, 3F), -76.2 (d,  $J^{F-H} = 6.4$  Hz 3F).  **$R_f = 0.36$  (10% DCM/Hexane). HRMS(APCI, -MS) calcd. for  $C_{17}H_{13}F_6O$  [M-H] m/z: 347.0871, found: 347.0803. HPLC: Daicel CHIRALPAK OJ-H column, 7% IPA/Hexane, flow 0.75ml/min; (4R,5S)-ligand: 11.2 min (major), 24.9 min (minor).**

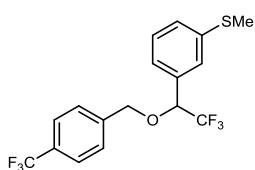

**1-(3-thiomethylphenyl)-1-(4-trifluoromethyl)benzyloxy-2,2,2-trifluoroethane(6g).**

Used 318 mg of trimethoxy(3-thiomethylphenyl) silane. For workup instead of 0.5M NaOH solution, 1M TBAF in THF was used. Product isolated as colorless oil.

**Run 1:** 348 mg, 92% yield (97% by  $^{19}F$  NMR), 95% *ee*. **Run 2:** 351 mg, 93% yield (97% by  $^{19}F$  NMR), 95% *ee*.

**$^1H$  NMR (500 MHz,  $CDCl_3$ ):**  $\delta$  7.64(d,  $J^{H-H} = 7.9$  Hz, 2H), 7.46(d,  $J^{H-H} = 7.9$  Hz, 2H), 7.38-7.31(m, 3H), 7.22(d,  $J^{H-H} = 7.3$  Hz, 1H), 4.73 (d,  $J^{H-H} = 12.6$  Hz, 1H), 4.65(q,  $J^{H-H} = 6.3$  Hz, 1H), 4.56(d,  $J^{H-H} = 12.6$  Hz, 1H), 2.51(s, 3H).  **$^{13}C$  NMR (125 MHz,  $CDCl_3$ ):**  $\delta$  140.7, 149.7, 133, 130.2(q,  $J^{C-F} = 32.3$  Hz), 129.3, 127.9, 127.7, 126.1, 125.7(q,  $J^{C-F} = 3.4$  Hz), 125, 124.2(q,  $J^{C-F} = 272$  Hz), 123.7(q,  $J^{C-F} = 282$  Hz), 79.0(q,  $J^{C-F} = 32$  Hz), 71, 15.7  **$^{19}F$  NMR (188 MHz,  $CDCl_3$ ):**  $\delta$  -62.8 (s, 3F), -76.5 (d,  $J^{F-H} = 6.4$  Hz 3F).  **$R_f = 0.20$  (10% DCM/hexane). HRMS(APCI, +MS) calcd. for  $C_{17}H_{13}F_6OS$  [M+] m/z: 380.0664, found: 380.0723. HPLC: Daicel CHIRALPAK OJ-H column, 7% IPA/Hexane, flow 0.75ml/min; (4R,5S)-ligand: 10.9 min (major), 14.5 min (minor).**

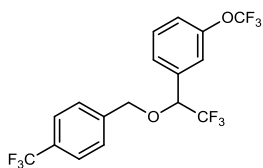

**1-(3-trifluoromethoxyphenyl)-1-(4-trifluoromethyl)benzyloxy-2,2,2-trifluoroethane(6h).**

Used 367 mg of trimethoxy(3-trifluoromethoxyphenyl) silane. Product isolated as colorless oil.

**Run 1:** 362 mg, 87% yield (96% by  $^{19}F$  NMR), 94% *ee*. **Run 2:** 363 mg, 93% yield (96% by  $^{19}F$  NMR), 94% *ee*.

**$^1H$  NMR (300 MHz,  $CDCl_3$ ):**  $\delta$  7.63.(d,  $J^{H-H} = 8.1$  Hz, 2H), 7.24-7.5(m, 6H), 4.74 (d,  $J^{H-H} = 12.5$  Hz, 1H), 4.69(q,  $J^{H-H} = 6.4$  Hz, 1H), 4.59(d,  $J^{H-H} = 12.6$  Hz, 1H).  **$^{13}C$  NMR (125 MHz,  $CDCl_3$ ):**  $\delta$  149.7, 140.4, 134.8, 130.7(q,  $J^{C-F} = 32.5$  Hz), 130.5, 128, 126.8, 125.8(q,  $J^{C-F} = 3.7$  Hz), 124.1(q,  $J^{C-F} = 272$  Hz), 123.5(q,  $J^{C-F} = 282$  Hz), 122.4, 120.9, 120.6(q,  $J^{C-F} = 257$  Hz), 78.5 (q,  $J^{C-F} = 32$  Hz), 71.5  **$^{19}F$  NMR (188 MHz,  $CDCl_3$ ):**  $\delta$  -58.1 (s, 3F), -62.8 (s, 3F), -76.6 (d,  $J^{F-H} = 6.4$  Hz 3F).  **$R_f = 0.41$  (10% DCM/hexane). HRMS(APCI, +MS) calcd. for  $C_{17}H_{12}F_9O_2$  [M+] m/z: 417.0539, found: 417.0532. HPLC: Daicel CHIRALPAK OJ-H column, 0.5% IPA/Hexane, flow 0.75ml/min; (4R,5S)-ligand: 11.9 min (major), 20.4 min (minor).**

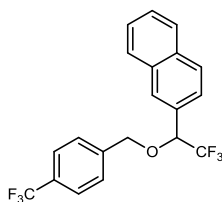

1-(2-naphthyl)-1-(4-trifluoromethyl)benzyloxy-2,2,2-trifluoroethane (6i).

Used 323 mg of trimethoxy(2-naphthyl) silane. Product isolated as colorless oil.

**Run 1:** 365 mg, 95% yield (98% by  $^{19}\text{F}$  NMR), 96% *ee*. **Run 2:** 360 mg, 94% yield (97% by  $^{19}\text{F}$  NMR), 96% *ee*.

$^1\text{H}$  NMR (300 MHz,  $\text{CDCl}_3$ ):  $\delta$  7.84-7.96(m, 4H), 7.51-7.62(m, 5H), 7.37-7.32(m, 1H), 7.45(d,  $J^{\text{H-H}} = 8.1$  Hz, 2H), 4.84(q,  $J^{\text{H-H}} = 6.6$  Hz, 1H), 4.75(d,  $J^{\text{H-H}} = 12.4$  Hz, 1H), 4.58 (d,  $J^{\text{H-H}} = 12.4$  Hz, 1H).  $^{13}\text{C}$  NMR (151 MHz,  $\text{CDCl}_3$ ):  $\delta$  140.8, 134.1, 133.1, 130.5(q,  $J^{\text{C-F}} = 32$  Hz), 129.6, 128.9, 128.8, 128.3, 128, 127.9, 127.2, 126.8, 125.7(q,  $J^{\text{C-F}} = 3.8$  Hz), 125, 126, 124.2(q,  $J^{\text{C-F}} = 273$  Hz), 124(q,  $J^{\text{C-F}} = 281$  Hz), 79.3(q,  $J^{\text{C-F}} = 31$  Hz), 70.9.  $^{19}\text{F}$  NMR (188 MHz,  $\text{CDCl}_3$ ):  $\delta$  -62.8 (s, 3F), -76.3 (d,  $J^{\text{F-H}} = 6.6$  Hz 3F).  $R_f = 0.33$  (10% DCM/Hexane). HRMS(APCI, +MS) calcd. for  $\text{C}_{20}\text{H}_{15}\text{F}_6\text{O}$  [M+H] *m/z*: 384.0943, found: 384.0934. HPLC: Daicel CHIRALPAK OJ-H column, 7% IPA/Hexane, flow 0.75ml/min; (4R,5S)-ligand: 19.1 min (major), 27.7 min (minor).

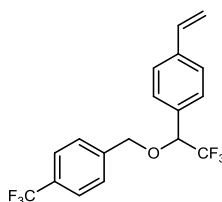

1-(4-vinylphenyl)-1-(4-trifluoromethyl)benzyloxy-2,2,2-trifluoroethane(6j).

Used 291 mg (275  $\mu\text{L}$ ) of trimethoxy(4-vinylphenyl) silane. Product isolated as colorless oil.

**Run 1:** 199 mg, 54% yield (73% by  $^{19}\text{F}$  NMR), 95% *ee*. **Run 2:** 205 mg, 57% yield (72% by  $^{19}\text{F}$  NMR), 96% *ee*.

$^1\text{H}$  NMR (300 MHz,  $\text{CDCl}_3$ ): 7.62(d, 2H,  $J^{\text{H-H}} = 8.2$  Hz, 7.50-7.38(m, 6H), 6.75(dd,  $J^{\text{H-H}} = 17.5$  Hz, 10.9 Hz, 1H), 5.81(dd,  $J^{\text{H-H}} = 17.5$  Hz, 6.9 Hz, 1H), 5.33(d,  $J^{\text{H-H}} = 10.9$  Hz, 1H), 4.71(d,  $J^{\text{H-H}} = 12.5$  Hz, 1H), 4.66(q,  $J^{\text{H-F}} = 6.6$  Hz, 1H), 4.54(d,  $J^{\text{H-H}} = 12.5$  Hz, 1H).  $^{13}\text{C}$  NMR (75 MHz,  $\text{CDCl}_3$ ):  $\delta$  140.8, 139.3, 136.2, 131.6, 130.5(q,  $J^{\text{C-F}} = 33$  Hz), 128.7, 127.9, 126.7, 125.7(q,  $J^{\text{C-F}} = 3.8$  Hz), 124.2(q,  $J^{\text{C-F}} = 282$  Hz), 123.8(q,  $J^{\text{C-F}} = 273$  Hz), 115.4, 79(q,  $J^{\text{C-F}} = 32$  Hz), 70.9.  $^{19}\text{F}$  NMR (188 MHz,  $\text{CDCl}_3$ ):  $\delta$  -62.8 (s, 3F), -76.6 (d,  $J^{\text{F-H}} = 6.5$  Hz 3F).  $R_f = 0.35$  (10% DCM/Hexane). HRMS(APCI, +MS) calcd. for  $\text{C}_{18}\text{H}_{15}\text{F}_6\text{O}$  [M+H] *m/z*: 361.1022, found: 361.1015. HPLC: Daicel CHIRALPAK OJ-H column, 7% IPA/Hexane, flow 0.75ml/min; (4R,5S)-ligand: 14.0 min (major), 29.9 min (minor).

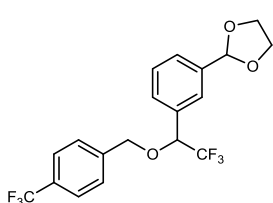

1-(3-(1,3-dioxolan-2-yl)phenyl)-1-(4-trifluoromethyl)benzyloxy-2,2,2-trifluoroethane(6k).

Used 351 mg of trimethoxy(3-(1,3-dioxolan-2-yl)phenyl) silane. Product isolated as white solid.

**Run 1:** 360 mg, 89% yield (93% by  $^{19}\text{F}$  NMR), 95% *ee*. **Run 2:** 362 mg, 89% yield (95% by  $^{19}\text{F}$  NMR), 96% *ee*.

**<sup>1</sup>H NMR (500 MHz, CDCl<sub>3</sub>):** δ 7.62(d, J<sup>H-H</sup> = 8.1 Hz, 2H), 7.54-7.58(m, 2H), 7.45-7.49(m, 2H), 7.43(d, J<sup>H-H</sup> = 8 Hz, 2H), 5.83, (s, 1H), 4.66-4.72 (m, 2H), 4.54(d, J<sup>H-H</sup> = 12.4 Hz, 1H), 4.10-4.18(m, 2H), 4.02-4.18(m, 2H). **<sup>13</sup>C NMR (125 MHz, CDCl<sub>3</sub>):** δ 140.8, 138.8, 132.5, 130.4(q, J<sup>C-F</sup> = 32.5 Hz), 129.2, 129.1, 128.2, 127.6, 126.7, 126.7(q, J<sup>C-F</sup> = 3.8 Hz), 124.2(q, J<sup>C-F</sup> = 272 Hz), 123.8(q, J<sup>C-F</sup> = 282 Hz), 103.4, 79.1(q, J<sup>C-F</sup> = 31.4 Hz), 71.0, 65.5. **<sup>19</sup>F NMR (188 MHz, CDCl<sub>3</sub>):** δ -62.7 (s, 3F), -76.4 (d, J<sup>F-H</sup> = 6.5 Hz, 3F). **R<sub>f</sub>** = 0.24 (30% DCM/hexane). **HRMS**(APCI, -MS) calcd. for [M-H] C<sub>19</sub>H<sub>15</sub>F<sub>6</sub>O<sub>3</sub> m/z: 405.0931, found: 405.1138. **HPLC:** Daicel CHIRALPAK OJ-H column, 7% IPA/Hexane, flow 0.75ml/min; (4R,5S)-ligand: 12.1 min (major), 13.8 min (minor).

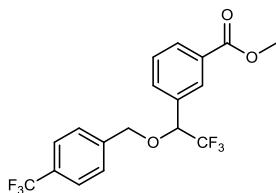

1-(3-(1,3-dioxalen-2-yl)phenyl)-1-(4-trifluoromethyl)benzyloxy-2,2,2-trifluoroethane(6l).

Used 333 mg of methyl (3-trimethoxysilyl)benzoate. Product isolated as colorless oil.

**Run 1:** 352 mg, 90% yield (95% by <sup>19</sup>F NMR), 93% *ee*. **Run 2:** 348mg, 89% yield (94% by <sup>19</sup>F NMR), 95% *ee*.

**<sup>1</sup>H NMR (500 MHz, CDCl<sub>3</sub>):** δ 8.08-8.14(m, 2H), 7.66 (d, J<sup>H-H</sup> = 7.7 Hz, 1H), 7.62(d, J<sup>H-H</sup> = 7.9 Hz, 2H), 7.52(m, 1H), 7.44(d, J<sup>H-H</sup> = 7.9 Hz, 2H), 4.70-4.76 (m, 2H), 4.58(d, J<sup>H-H</sup> = 12.6 Hz, 1H), 3.94(s, 3H). **<sup>13</sup>C NMR (125 MHz, CDCl<sub>3</sub>):** δ 166.6, 140.5, (q, J<sup>C-F</sup> = 1.1 Hz), 132.9(q, J<sup>C-F</sup> = 1.1 Hz), 132.6, 131.1, 131.0, 130.6(q, J<sup>C-F</sup> = 32.4 Hz), 129.7, 129.2, 127.9, 127.7 (q, J<sup>C-F</sup> = 3.8 Hz), 124.2(q, J<sup>C-F</sup> = 272 Hz), 123.7(q, J<sup>C-F</sup> = 282 Hz), 78.8(q, J<sup>C-F</sup> = 31.6 Hz), 71.3, 52.5. **<sup>19</sup>F NMR (188 MHz, CDCl<sub>3</sub>):** δ -62.8 (s, 3F), -76.5 (d, J<sup>F-H</sup> = 6.3 Hz, 3F). **R<sub>f</sub>** = 0.14 (20% DCM/hexane). **HRMS**(APCI, +MS) calcd. for [M+H] C<sub>18</sub>H<sub>15</sub>F<sub>6</sub>O<sub>3</sub> m/z: 393.0920, found: 393.0906. **HPLC:** Daicel CHIRALPAK OD-H column, 5% IPA/Hexane, flow 0.75ml/min; (4R,5S)-ligand: 10.3 min (major), 14.4 min (minor).

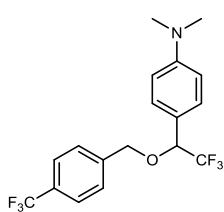

1-(4-(dimethylamino)phenyl)-1-(4-trifluoromethyl)benzyloxy-2,2,2-trifluoroethane(6m).

Used 314 mg of trimethoxy(4-(dimethylamino)phenyl) silane. Product isolated as colorless oil.

**Run 1:** 325 mg, 86% yield (94% by <sup>19</sup>F NMR), 96% *ee*. **Run 2:** 333 mg, 88% yield (96% by <sup>19</sup>F NMR), 96% *ee*.

**<sup>1</sup>H NMR (500 MHz, CDCl<sub>3</sub>):** δ 7.61(d, J<sup>H-H</sup> = 8.1 Hz, 2H), 7.44 (d, J<sup>H-H</sup> = 8.1 Hz, 2H), 7.29(d, J<sup>H-H</sup> = 8.7, 2H), 6.74(d, J<sup>H-H</sup> = 8.7 Hz, 2H), 4.68, (d, J<sup>H-H</sup> = 12.5 Hz, 2H), 4.56(q, J<sup>H-F</sup> = 6.5 Hz, 1H), 4.48(d, J<sup>H-H</sup> = 12.5 Hz, 1H), 2.996(s, 6H). **<sup>13</sup>C NMR (125 MHz, CDCl<sub>3</sub>):** δ 151.5, 141.3(q, J<sup>C-F</sup> = 1.3 Hz), 130.2(q, J<sup>C-F</sup> = 32 Hz), 129.5, 127.9, 125.6(q, J<sup>C-F</sup> = 3.8 Hz), 124.2(q, J<sup>C-F</sup> = 272 Hz), 124.1(q, J<sup>C-F</sup> = 281 Hz), 118.9(q, J<sup>C-F</sup> = 1.1 Hz), 78.9(q, J<sup>C-F</sup> = 31.7 Hz), 70.1, 40.4. **<sup>19</sup>F NMR (188 MHz, CDCl<sub>3</sub>):** δ -62.7 (s, 3F), -76.8 (d, J<sup>F-H</sup> = 6.5 Hz, 3F). **R<sub>f</sub>** = 0.2 (20% DCM/hexane). **HRMS**(APCI, +MS) calcd. for [M+H] C<sub>18</sub>H<sub>18</sub>F<sub>6</sub>NO m/z: 378.1287, found: 378.1269. **HPLC:** Daicel CHIRALPAK OJ-H column, 7% IPA/Hexane, flow 0.75ml/min; (4R,5S)-ligand: 16.5 min (major), 20.4 min (minor).

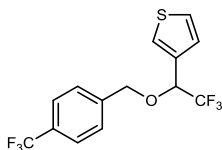

1-(3-thienyl)-1-(4-trifluoromethyl)benzyloxy-2,2,2-trifluoroethane (6n).

Used 266 mg of trimethoxy(3-thienyl) silane. Product isolated as colorless oil.

**Run 1:** 292 mg, 86% yield (92% by  $^{19}\text{F}$  NMR), 96% *ee*. **Run 2:** 294 mg, 86% yield (90% by  $^{19}\text{F}$  NMR), 96% *ee*.

$^1\text{H}$  NMR (500 MHz,  $\text{CDCl}_3$ ):  $\delta$  7.62(d,  $J^{\text{H-H}} = 8.1$  Hz, 2H), 7.41-7.46(m, 3H), 7.40(dd,  $J^{\text{H-H}} = 5.1$  Hz, 3 Hz, 1H), 7.17(d,  $J^{\text{H-H}} = 5.1$  Hz, 1H), 4.8 (q,  $J^{\text{H-F}} = 6.5$  Hz, 1H), 4.71(d,  $J^{\text{H-H}} = 12.6$  Hz, 1H), 4.57(d,  $J^{\text{H-H}} = 12.6$  Hz, 1H).  $^{13}\text{C}$  NMR (125 MHz,  $\text{CDCl}_3$ ):  $\delta$  140.8, 133.4, 130.5(q,  $J^{\text{C-F}} = 32.4$  Hz), 127.9, 127, 126.7, 126.3, 125.7(q,  $J^{\text{C-F}} = 3.8$  Hz), 124.2(q,  $J^{\text{C-F}} = 272$  Hz), 123.7(q,  $J^{\text{C-F}} = 282$  Hz), 73.5(q,  $J^{\text{C-F}} = 31.1$  Hz), 70.9.  $^{19}\text{F}$  NMR (188 MHz,  $\text{CDCl}_3$ ):  $\delta$  -62.7 (s, 3F), -76.5 (d,  $J^{\text{F-H}} = 6.5$  Hz, 3F).  $R_f = 0.27$  (hexane). HRMS(APCI, -MS) calcd. for [M-H]  $\text{C}_{14}\text{H}_9\text{F}_6\text{OS}$  m/z: 339.0284, found: 339.0287. HPLC: Daicel CHIRALPAK OJ-H column, 1% IPA/Hexane, flow 0.75ml/min; (4R,5S)-ligand: 11.0 min (major), 17.3 min (minor).

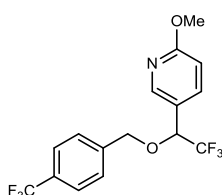

1-(2-methoxypyrid-5-yl)-1-(4-trifluoromethyl)benzyloxy-2,2,2-trifluoroethane(6o).

Used 298 mg of trimethoxy(2-methoxypyrid-5-yl) silane. Product isolated as colorless oil.

**Run 1:** 270 mg, 74% yield (85% by  $^{19}\text{F}$  NMR), 86% *ee*. **Run 2:** 265 mg, 73% yield (82% by  $^{19}\text{F}$  NMR), 87% *ee*.

$^1\text{H}$  NMR (400 MHz,  $\text{CDCl}_3$ ):  $\delta$  8.15(d,  $J^{\text{H-H}} = 2.3$  Hz, 1H), 7.7(dd,  $J^{\text{H-H}} = 8.6$  Hz, 2.3 Hz, 1H), 7.62(d,  $J^{\text{H-H}} = 8$  Hz, 2H), 7.43(d,  $J^{\text{H-H}} = 8$  Hz, 2H), 6.82 (d,  $J^{\text{H-H}} = 8.6$  Hz), 4.7 (d,  $J^{\text{H-H}} = 12.5$  Hz, 1H), 4.63(q,  $J^{\text{H-F}} = 6.5$  Hz, 1H), 4.56(d,  $J^{\text{H-H}} = 12.5$  Hz, 1H), 3.97, (s, 3H).  $^{13}\text{C}$  NMR (100 MHz,  $\text{CDCl}_3$ ):  $\delta$  165.4, 147.5, 140.5, 138.2, 130.6(q,  $J^{\text{C-F}} = 32.6$  Hz), 127.9, 125.7(q,  $J^{\text{C-F}} = 3.4$  Hz), 124.1(q,  $J^{\text{C-F}} = 272$  Hz), 123.8(q,  $J^{\text{C-F}} = 282$  Hz), 120.9, 111.7, 76.9(q,  $J^{\text{C-F}} = 32$  Hz), 71.0, 53.8.  $^{19}\text{F}$  NMR (376 MHz,  $\text{CDCl}_3$ ):  $\delta$  -62.8 (s, 3F), -76.8 (d,  $J^{\text{F-H}} = 6.5$  Hz, 3F).  $R_f = 0.28$  (10% EtOAc/hexane). HRMS(APCI, +MS) calcd. for [M+H]  $\text{C}_{16}\text{H}_{14}\text{F}_6\text{NO}_2$  m/z: 366.0929, found: 366.0952. HPLC: Daicel CHIRALPAK OJ-H column, 2% IPA/Hexane, flow 0.75ml/min; (4R,5S)-ligand: 9.9 min (major), 10.9 min (minor).

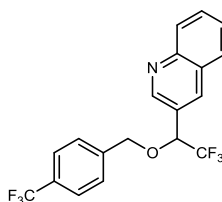

1-(quinolin-3-yl)-1-(4-trifluoromethyl)benzyloxy-2,2,2-trifluoroethane(6p).

Used 324 mg of trimethoxy(quinolin-3-yl) silane. Product isolated as slightly yellowish oil.

**Run 1:** 290 mg, 75% yield (89% by  $^{19}\text{F}$  NMR), 49% *ee*. **Run 2:** 283 mg, 73% yield (86% by  $^{19}\text{F}$  NMR), 55% *ee*.

**<sup>1</sup>H NMR (500 MHz, CDCl<sub>3</sub>):** δ 8.96(s, 1H), 8.27(s, 1H), 8.17(d, J<sup>H-H</sup>= 8.47 Hz, 1H), 7.88(d, J<sup>H-H</sup>= 8.3 Hz, 1H), 7.81(t, 7.1 Hz, 1H), 7.6-7.66 (m, 3H), 7.45(d, J<sup>H-H</sup>= 7.9 Hz, 2H), 4.91(q, J<sup>H-F</sup> = 6.5 Hz, 1H), 4.80 (d, J<sup>H-H</sup>= 12.1 Hz, 1H), 4.67(d, J<sup>H-H</sup>= 12.1 Hz, 1H). **<sup>13</sup>C NMR (100 MHz, CDCl<sub>3</sub>):** δ 149.7, 148.9, 140.2, 136.4, 130.8, 130.7(q, J<sup>C-F</sup>= 32.6 Hz), 129.6, 128.2, 128.0, 127.6, 127.5, 125.8(q, J<sup>C-F</sup> = 3.8 Hz), 125.4, 124.1(q, J<sup>C-F</sup>= 273 Hz), 123.7(q, J<sup>C-F</sup>= 282 Hz), 77.5(q, J<sup>C-F</sup>= 32 Hz), 71.6. **<sup>19</sup>F NMR (376 MHz, CDCl<sub>3</sub>):** δ -62.8 (s, 3F), -76.3 (d, J<sup>F-H</sup>= 6.4 Hz, 3F). **R<sub>f</sub>** = 0.28 (20% EtOAc/hexane). **HRMS**(APCI, +MS) calcd. for [M+H] C<sub>19</sub>H<sub>14</sub>F<sub>6</sub>NO m/z: 386.0980, found: 386.0997. **HPLC:** Daicel CHIRALPAK OD-H column, 7% IPA/Hexane, flow 0.75ml/min; (4R,5S)-ligand: 9.8 min (major), 13.8 min (minor).

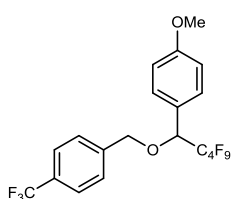

1-(4-methoxyphenyl)-1-(4-trifluoromethyl)benzyloxy-1-H-perfluoropentane(6b')

Used 442.6 mg of **4g** and 297 mg (268 μl) trimethoxy(4-methoxyphenyl) silane. Product isolated as colorless oil.

**Run 1:** 437 mg, 85% yield (94% by <sup>19</sup>F NMR), 96% ee. **Run 2:** 416 mg, 82% yield (94% by <sup>19</sup>F NMR), 93% ee.

**<sup>1</sup>H NMR (300 MHz, CDCl<sub>3</sub>):** 7.61(d, J<sup>H-H</sup>= 8.1 Hz, 2H ), 7.34-7.42(m, 4H), 6.96(d, J<sup>H-H</sup>= 8.7 Hz, 2H), 4.82, (dd, J<sup>H-F</sup>= 19.2 Hz, 5.2 Hz, 1H), 4.59(d, J<sup>H-H</sup>= 12.2 Hz, 1H), 4.43(d, J<sup>H-H</sup>= 12.2 Hz, 1H), 3.86(s, 3H). **<sup>13</sup>C NMR (151 MHz, CDCl<sub>3</sub>):** δ 161, 140.6, 130.5, 130.4, (q, J<sup>C-F</sup>= 32.3 Hz), 127.9, 125.6(q, J<sup>C-F</sup>= 3.8 Hz), 124.2 (q, J<sup>C-F</sup>= 271 Hz ), 114.23, 78.2(dd, J<sup>C-F</sup>= 30.9 Hz, 21.3 Hz), 70.3, 55.5. *Signals for carbons of the perfluoroalkyl group were not observed.* **<sup>19</sup>F NMR (188 MHz, CDCl<sub>3</sub>):** δ -62.8(s, 3F), -81.1(tt, J<sup>F-F</sup>= 10.1 Hz, 3Hz, 3F), -116.3(dm, J<sup>F-F</sup>= 291.1 Hz, 1F(α-F)), -121.3(dm, J<sup>F-F</sup>= 295.6 Hz, 1F(γ-F)), -123.5(dm, J<sup>F-F</sup>= 295.6 Hz, 1F(γ-F)), -125.3(dm, J<sup>F-F</sup>= 289 Hz, 1F(β-F)), -125.7(dm, J<sup>F-F</sup>= 291.1 Hz, 1F(α-F)), -125.7(dm, J<sup>F-F</sup>= 289 Hz, 1F(β-F)). **R<sub>f</sub>** = 0.22 (10% DCM/Hexane). **HRMS**(APCI, +MS) calcd. for C<sub>20</sub>H<sub>15</sub>F<sub>12</sub>O<sub>2</sub> [M+] m/z: 514.0797, found: 514.0802. **HPLC:** Daicel CHIRALPAK OD-H column, 1% IPA/Hexane, flow 0.75ml/min; (4R,5S)-ligand: 6.4 min (major), 10.9 min (minor).

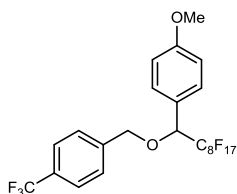

1-(4-methoxyphenyl)-1-(4-trifluoromethyl)benzyloxy-1-H-perfluorononane(6b'')

Used 642.6 mg of **4f** and 297 mg (268 μl) trimethoxy(4-methoxyphenyl) silane. Product isolated as colorless solid.

**Run 1:** 583 mg, 83% yield (94% by <sup>19</sup>F NMR), 95% ee. **Run 2:** 598 mg, 84% yield (94% by <sup>19</sup>F NMR), 95% ee.

**<sup>1</sup>H NMR (300 MHz, CDCl<sub>3</sub>):** 7.61(d, J<sup>H-H</sup>= 8 Hz, 2H), 7.38(m, 4H), 7.33(d, J<sup>H-H</sup>= 8.5 Hz, 2H), 6.97(d, J<sup>H-H</sup>= 8.8 Hz, 2H), 4.82(dd, J<sup>H-F</sup>= 19.1 Hz, 4.6 Hz, 1H), 4.60 (d, J<sup>H-H</sup>= 12.1 Hz, 1H), 4.43(q, J<sup>H-H</sup>= 12.1 Hz, 1H), 3.85(s, 3H). **<sup>13</sup>C NMR (151 MHz, CDCl<sub>3</sub>):** δ 161, 140.6(q, J<sup>C-F</sup>= 1.5 Hz), 130.5, 130.4, (q, J<sup>C-F</sup>= 32.3 Hz), 127.9, 125.6(q, J<sup>C-F</sup>= 3.7 Hz), 124.2 (q, J<sup>C-F</sup>= 272 Hz), 123, 114.3, 78.3(dd,

$J^{C-F} = 30.6$  Hz, 20.6 Hz), 70.3, 55.5. Signals for carbons of the perfluoroalkyl group were not observed.  **$^{19}F$  NMR (188 MHz,  $CDCl_3$ ):**  $\delta$  -62.8(s, 3F), -80.9 (t,  $J^{F-F} = 10.2$  Hz 3F), -116.1(dm, 288 Hz), -119 - -128(m, 13F).  $R_f = 0.23$  (10% DCM/Hexane). **HRMS**(APCI, +MS) calcd. for  $C_{24}H_{15}F_{20}O_2$  [M+] m/z: 715.0753, found: 715.0742. **HPLC:** Daicel CHIRALPAK OD-H column, 100% Hexane, flow 1.5ml/min; (4R,5S)-ligand: 8.1 min (major), 20.8 min (minor).

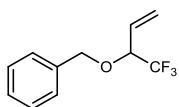

1-vinyl-1-benzyloxy-2,2,2-trifluoroethane(8a).

Ligand **7g** (36.5 mg) was used instead of **7a**. Used 185 mg (192  $\mu$ L) of trimethoxy(vinyl) silane. No additional light irradiation was used. Product isolated as colorless oil.

**Run 1:** 198 mg, 92% yield (98% by  $^{19}F$  NMR), 91% ee. **Run 2:** 201 mg, 93% yield (98% by  $^{19}F$  NMR), 91% ee.

**$^1H$  NMR (300 MHz,  $CDCl_3$ ):**  $\delta$  7.28-7.43(m, 5H), 5.74-5.90(m, 1H), 5.55(s, 1H), 5.51 (d,  $J^{H-H} = 5.4$  Hz, 1H), 4.73(d,  $J^{H-H} = 12$  Hz, 1H), 4.60(d,  $J^{H-H} = 12$  Hz, 1H), 4.13(m, 1H).  **$^{13}C$  NMR (151 MHz,  $CDCl_3$ ):**  $\delta$  136.8, 129.3(q,  $J^{C-F} = 1.6$  Hz), 128.7, 128.3, 128.1, 124.1(q,  $J^{C-F} = 282$  Hz), 123.2, 77.7(q,  $J^{C-F} = 31.4$  Hz), 71.8.  **$^{19}F$  NMR (188 MHz,  $CDCl_3$ ):** -77.0 (d,  $J^{F-H} = 6.7$  Hz 3F).  $R_f = 0.42$  (10% DCM/Hexane). **HRMS**(APCI, -MS) calcd. for [M-H]  $C_{11}H_{10}F_3O$  m/z: 215.0684, found: 215.0696. **HPLC:** Daicel CHIRALPAK OJ-H column, 3% IPA/Hexane, flow 0.75ml/min; (4R)-ligand: 6.4 min (minor), 6.9 min (major).

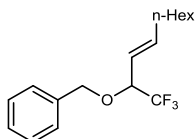

1-(E-octenyl-1)-1-benzyloxy-2,2,2-trifluoroethane(8b).

Ligand **7g** (36.5 mg) was used instead of **7a**. Used 291 mg of trimethoxy(octenyl) silane. No additional light irradiation was used. Product isolated as colorless oil.

**Run 1:** 280 mg, 93% yield (98% by  $^{19}F$  NMR), 89% ee. **Run 2:** 283 mg, 93% yield (99% by  $^{19}F$  NMR), 91% ee.

**$^1H$  NMR (300 MHz,  $CDCl_3$ ):** 7.28-7.42(m, 5H), 5.88(dt,  $J^{H-H} = 15.5$  Hz, 5.8 Hz, 1H), 5.42(dd,  $J^{H-H} = 15.5$  Hz,  $J^{H-H} = 8.1$  Hz, 1H), 4.70(d,  $J^{H-H} = 12.1$  Hz, 1H), 4.54(d,  $J^{H-H} = 12.1$  Hz, 1H), 4.06(m, 1H).  **$^{13}C$  NMR (151 MHz,  $CDCl_3$ ):**  $\delta$  141, 137.1, 128.6, 128.2, 128, 124.3(q,  $J^{C-F} = 281$  Hz), 120.9(q,  $J^{C-F} = 1.6$  Hz), 77.7(q,  $J^{C-F} = 31.4$  Hz), 71, 32.4, 31.8, 28.8, 28.7, 22.7, 14.2.  **$^{19}F$  NMR (188 MHz,  $CDCl_3$ ):**  $\delta$  -77.1 (d,  $J^{F-H} = 6.3$  Hz 3F).  $R_f = 0.48$  (10% DCM/Hexane). **HRMS**(APCI, -MS) calcd. for [M-H]  $C_{17}H_{22}F_3O$  m/z: 299.1623, found: 299.1627. **HPLC:** Daicel CHIRALPAK OJ-H column, 1% IPA/Hexane, flow 0.75ml/min; (4R)-ligand: 5.3 min (minor), 5.7 min (major).

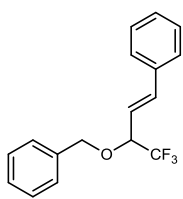

1-(2-phenylethenyl)-1-(benzyloxy)-2,2,2-trifluoroethane(8c).

Ligand **7g** (36.5 mg) was used instead of **7a**. Used 291 mg of trimethoxy(styryl) silane. No additional light irradiation was used. Product isolated as colorless oil.

**Run 1:** 275 mg, 95% yield (100% by  $^{19}\text{F}$  NMR), 88% *ee*. **Run 2:** 272 mg, 94% yield (100% by  $^{19}\text{F}$  NMR), 92% *ee*.

$^1\text{H}$  NMR (300 MHz,  $\text{CDCl}_3$ ): 7.28-7.50(m, 10H), 6.77(d,  $J^{\text{H-H}} = 16$  Hz, 1H), 6.14(dd,  $J^{\text{H-H}} = 16$  Hz,  $J^{\text{H-H}} = 7.8$  Hz, 1H), 4.78(d,  $J^{\text{H-H}} = 12$  Hz, 1H), 4.64(d,  $J^{\text{H-H}} = 12$  Hz, 1H), 4.3(m, 1H), 4.12(q,  $J^{\text{H-H}} = 6.7$  Hz, 2H), 1.2-1.48(m, 8H), 0.89(t,  $J^{\text{H-H}} = 6.8$  Hz, 3H).  $^{13}\text{C}$  NMR (151 MHz,  $\text{CDCl}_3$ ):  $\delta$  138, 136.8, 135.5, 128.95, 128.9, 128.7, 128.3, 128.1, 127.1, 124.2(q,  $J^{\text{C-F}} = 282$  Hz), 119.9, 77.6(q,  $J^{\text{C-F}} = 31.4$  Hz), 71.6.  $^{19}\text{F}$  NMR (188 MHz,  $\text{CDCl}_3$ ):  $\delta$  -76.7 (d,  $J^{\text{F-H}} = 6.8$  Hz 3F).  $R_f = 0.29$  (10% DCM/Hexane). HRMS(APCI, -MS) calcd for [M-H]  $\text{C}_{17}\text{H}_{14}\text{F}_3\text{O}$   $m/z$ : 291.1002, found: 291.1000. HPLC: Daicel CHIRALPAK OJ-H column, 3% IPA/Hexane, flow 0.75ml/min; (4R)-ligand: 12.3 min (major), 13.6 min (minor).

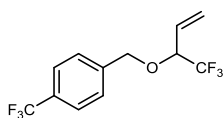

1-vinyl-1-(4-(trifluoromethyl)benzyloxy)-2,2,2-trifluoroethane(8d).

Ligand **7g** (36.5 mg) was used instead of **7a**. Used 185 mg (192  $\mu\text{L}$ ) of trimethoxy(vinyl) silane. No additional light irradiation was used. Product isolated as colorless oil.

**Run 1:** 265 mg, 95% yield (98% by  $^{19}\text{F}$  NMR). **Run 2:** 262 mg, 94% yield (99% by  $^{19}\text{F}$  NMR).

$^1\text{H}$  NMR (300 MHz,  $\text{CDCl}_3$ ):  $\delta$  7.63(d, 2H,  $J^{\text{H-H}} = 8.1$  Hz, 7.47(d,  $J^{\text{H-H}} = 8.1$  Hz, 2H), 5.75-5.9, (m, 1H), 5.55-5.6(m, 2H), 4.77(d,  $J^{\text{H-H}} = 12.6$  Hz, 1H), 4.65 (d,  $J^{\text{H-H}} = 12.6$  Hz, 1H), 4.14(m, 1H).  $^{13}\text{C}$  NMR (151 MHz,  $\text{CDCl}_3$ ):  $\delta$  140.9, 130.4(q,  $J^{\text{C-F}} = 32$  Hz), 129.0(q,  $J^{\text{C-F}} = 1.6$  Hz), 127.8, 125.7(q,  $J^{\text{C-F}} = 3.8$  Hz), 124.2(q,  $J^{\text{C-F}} = 272$  Hz), 124.2(q,  $J^{\text{C-F}} = 282$  Hz), 123.6, 78.4(q,  $J^{\text{C-F}} = 31.4$  Hz), 70.9.  $^{19}\text{F}$  NMR (188 MHz,  $\text{CDCl}_3$ ):  $\delta$  -62.8 (s, 3F), -77.0 (d,  $J^{\text{F-H}} = 6.4$  Hz 3F).  $R_f = 0.46$  (10% DCM/Hexane). HRMS(APCI, +MS) calcd. for  $\text{C}_{12}\text{H}_{11}\text{F}_6\text{O}$  [M+H]  $m/z$ : 283.0552, found: 283.0568. HPLC: Enantiomers were not separated.

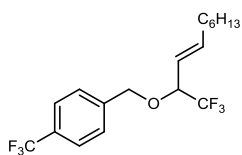

1-(E-octenyl)-1-(4-(trifluoromethyl)benzyloxy)-2,2,2-trifluoroethane(8e).

Ligand **7g** (36.5 mg) was used instead of **7a**. Used 185 mg (192  $\mu\text{L}$ ) of trimethoxy(octenyl) silane. No additional light irradiation was used. Product isolated as colorless oil.

**Run 1:** 348 mg, 95% yield (100% by  $^{19}\text{F}$  NMR). **Run 2:** 340 mg, 93% yield (100% by  $^{19}\text{F}$  NMR)

$^1\text{H}$  NMR (300 MHz,  $\text{CDCl}_3$ ):  $\delta$  7.62(d, 2H,  $J^{\text{H-H}} = 8.1$  Hz, 7.45(d,  $J^{\text{H-H}} = 8.1$  Hz, 2H), 5.91(dt,  $J^{\text{H-H}} = 15.5$  Hz,  $J^{\text{H-H}} = 6.8$  Hz)5.43(dd,  $J^{\text{H-H}} = 15.5$  Hz,  $J^{\text{H-H}} = 8.2$  Hz), 4.59(d,  $J^{\text{H-H}} = 12.6$  Hz, 1H), 4.07(m, 1H), 2.13(m, 2H), 1.47-1.22(m, 8H), 0.93-0.83(m, 3H).  $^{13}\text{C}$  NMR (151 MHz,  $\text{CDCl}_3$ ):  $\delta$  141.5, 141.3,



130.3(q,  $J^{C-F} = 32$  Hz), 127.8, 125.6(q,  $J^{C-F} = 3.8$  Hz), 124.2(q,  $J^{C-F} = 272$  Hz), 124.1(q,  $J^{C-F} = 282$  Hz), 120.7(q,  $J^{C-F} = 1.7$  Hz), 78.4(q,  $J^{C-F} = 31.5$  Hz), 70.2, 32.4, 31.7, 28.8, 28.7, 22.7, 14.1.  **$^{19}F$  NMR (188 MHz,  $CDCl_3$ ):**  $\delta$  -62.8 (s, 3F), -77.1 (d,  $J^{F-H} = 6.5$  Hz 3F).  $R_f = 0.52$  (10% DCM/Hexane). **HRMS**(APCI, +MS) calcd. for  $C_{18}H_{23}F_6O$  [M+H] m/z: 369.1653, found: 368.1660. **HPLC**: Enantiomers were not separated.

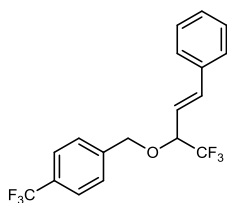

1-(2-phenylethenyl)-1-(4-(trifluoromethyl)benzyloxy)-2,2,2-trifluoroethane(8f).

Ligand **7g** (36.5 mg) was used instead of **7a**. Used 291 mg of trimethoxy(styryl) silane. No additional light irradiation was used. Product isolated as colorless oil.

**Run 1:** 341 mg, 95% yield (100% by  $^{19}F$  NMR), 88% *ee*. **Run 2:** 344 mg, 96% yield (100% by  $^{19}F$  NMR), 93% *ee*.

**$^1H$  NMR (300 MHz,  $CDCl_3$ ):** 7.62(d,  $J^{H-H} = 8.2$  Hz, 2H), 7.52-7.32(m, 7H), 6.78(d,  $J^{H-H} = 16$  Hz, 1H), 6.14(dd,  $J^{H-H} = 16$  Hz,  $J^{H-H} = 6.9$  Hz, 1H), 4.82(d,  $J^{H-H} = 12.5$  Hz, 1H), 4.68(d,  $J^{H-H} = 12.5$  Hz, 1H), 4.31(m, 1H).  **$^{13}C$  NMR (151 MHz,  $CDCl_3$ ):**  $\delta$  141, 138.4, 135.3, 130.4(q,  $J^{C-F} = 32$  Hz), 129.1, 128.9, 127.9, 127.1, 125.6(q,  $J^{C-F} = 3.8$  Hz), 124.2(q,  $J^{C-F} = 272$  Hz), 124.0(q,  $J^{C-F} = 282$  Hz), 119.5, 78.4(q,  $J^{C-F} = 31.4$  Hz), 70.7.  **$^{19}F$  NMR (188 MHz,  $CDCl_3$ ):**  $\delta$  -62.8 (s, 3F), -76.7 (d,  $J^{F-H} = 6.3$  Hz 3F).  $R_f = 0.32$  (10% DCM/Hexane). **HRMS**(APCI, +MS) calcd. for  $C_{18}H_{15}F_6O$  [M+H] m/z: 361.1015, found: 361.1021. **HPLC**: Daicel CHIRALPAK OJ-H column, 3% IPA/Hexane, flow 0.75ml/min; (4R)-ligand: 15.4 min (major), 19.0 min (minor).

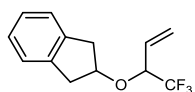

1-vinyl-1-(2-indanoxy)-2,2,2-trifluoroethane(8g).

Ligand **7g** (36.5 mg) was used instead of **7a**. Used 185 mg (192  $\mu$ L) of trimethoxy(vinyl) silane and 251 mg of **4g**. No additional light irradiation was used. Product isolated as colorless oil.

**Run 1:** 229 mg, 95% yield (98% by  $^{19}F$  NMR), 88% *ee*. **Run 2:** 231 mg, 95% yield (97% by  $^{19}F$  NMR), 89% *ee*.

**$^1H$  NMR (600 MHz,  $CDCl_3$ ):**  $\delta$  7.12-7.24(m, 4H), 5.84(ddd,  $J^{H-H} = 16.9$  Hz, 10.3 Hz, 6.4 Hz, 1H), 5.52(d,  $J^{H-H} = 16.9$  Hz, 1H), 5.47(d,  $J^{H-H} = 10.3$  Hz, 1H), 4.55(tt,  $J^{H-H} = 6.4$  Hz, 4.9 Hz, 1H), 4.21(m, 1H), 3.13-3.25(m, 2H), 2.98-3.08(m, 2H).  **$^{13}C$  NMR (151 MHz,  $CDCl_3$ ):**  $\delta$  140.44, 140.40, 129.93, 129.91, 126.85, 126.84, 124.8, 124(q,  $J^{C-F} = 280$  Hz), 122.1, 80.7, 77.7(q,  $J^{C-F} = 31$  Hz), 39.7, 38.3.  **$^{19}F$  NMR (188 MHz,  $CDCl_3$ ):**  $\delta$  -77.4 (d,  $J^{F-H} = 6.7$  Hz 3F).  $R_f = 0.16$  (Hexane). **HRMS**(ES MS+) calcd. for [M+H]  $C_{13}H_{13}OF_3$ , m/z: 242.0918, found: 242.0953. **HPLC**: Daicel CHIRALPAK OJ-H column, 1% IPA/Hexane, flow 0.75ml/min; (4R)-ligand: 8.1 min (major), 9.7 min (minor).

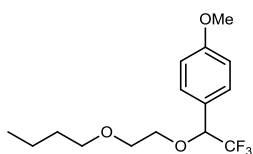

1-(2-(butoxy)ethoxy)-1-(4-methoxyphenyl)-2,2,2-trifluoroethane(11a).

Used 234.6mg of **4c** and 297 mg (268  $\mu$ l) of trimethoxy(4-methoxyphenyl) silane. Product isolated as colorless oil. Note: reaction time 72h.

**Run 1:** 281 mg, 92% yield (98% by  $^{19}\text{F}$  NMR), 93% *ee*. **Run 2:** 282 mg, 92% yield (97% by  $^{19}\text{F}$  NMR), 94% *ee*.

$^1\text{H}$  NMR (300 MHz,  $\text{CDCl}_3$ ): 7.33(d,  $J^{\text{H-H}} = 8.5$  Hz, 2H), 6.92(d,  $J^{\text{H-H}} = 8.5$  Hz, 2H), 4.71(q,  $J^{\text{H-F}} = 6.8$  Hz, 1H), 3.82(s, 3H), 3.62- 3.68(m, 1H), 3.55-3.62(m, 1H), 3.42(m, 2H), 1.47-1.60(m, 2H), 1.28-1.43(m, 2H), 0.91(t,  $J^{\text{H-H}} = 7.2$  Hz, 3H).  $^{13}\text{C}$  NMR (151 MHz,  $\text{CDCl}_3$ ):  $\delta$  156.6, 129.7, 125, 124.1(q,  $J^{\text{C-F}} = 281\text{Hz}$ ), 114, 79.7(q,  $J^{\text{C-F}} = 30.8\text{Hz}$ ), 71.4, 70.4, 69.6, 55.4, 31.9, 19.4, 14.  $^{19}\text{F}$  NMR (188 MHz,  $\text{CDCl}_3$ ):  $\delta$  -77.1 (d,  $J^{\text{F-H}} = 6.7$  Hz 3F).  $R_f = 0.29$  (40% DCM/Hexane). HRMS(ESI, +MS) calcd. for  $\text{C}_{15}\text{H}_{21}\text{F}_3\text{O}_3\text{Na}$  [M+Na]  $m/z$ : 329.1335, found: 329.1387. HPLC: Daicel CHIRALPAK OD-H column, 0.5% IPA/Hexane, flow 0.75ml/min; (4R,5S)-ligand: 17.4 min (major), 20.0 min (minor).

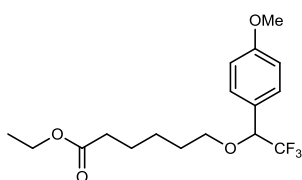

Ethyl 6-(1-(4-methoxyphenyl)-2,2,2-trifluoroethoxy)hexanoate(11b).

Used 277.7mg of **4d** and 297 mg (268  $\mu$ l) of trimethoxy(4-methoxyphenyl) silane. Product isolated as colorless oil. Note: reaction time 72h.

**Run 1:** 324 mg, 93% yield (97% by  $^{19}\text{F}$  NMR), 97% *ee*. **Run 2:** 319 mg, 92% yield (97% by  $^{19}\text{F}$  NMR), 96% *ee*.

$^1\text{H}$  NMR (300 MHz,  $\text{CDCl}_3$ ): 7.33(d,  $J^{\text{H-H}} = 8.5$  Hz, 2H), 6.92(d,  $J^{\text{H-H}} = 8.5$  Hz, 2H), 4.51(q,  $J^{\text{H-F}} = 6.7$  Hz, 1H), 4.12(q,  $J^{\text{H-H}} = 7.1$  Hz, 2H), 3.82(s, 3H), 3.47(t,  $J^{\text{H-H}} = 6.4$  Hz, 2H), 2.28(t,  $J^{\text{H-H}} = 7.5$  Hz, 2H), 1.55-1.69(m, 4H), 1.32-1.46(m, 2H), 1.25(t,  $J^{\text{H-H}} = 7.1$  Hz).  $^{13}\text{C}$  NMR (151 MHz,  $\text{CDCl}_3$ ):  $\delta$  173.8, 160.6, 129.5, 125.2, 124.1(q,  $J^{\text{C-F}} = 283$  Hz), 114.1, 79.6(q,  $J^{\text{C-F}} = 31$  Hz), 70.3, 60.4, 55.4, 34.4, 29.3, 25.6, 24.8, 14.4.  $^{19}\text{F}$  NMR (188 MHz,  $\text{CDCl}_3$ ):  $\delta$  -77.1 (d,  $J^{\text{F-H}} = 6.7$  Hz 3F).  $R_f = 0.17$  (40% DCM/Hexane). HRMS(APCI, +MS) calcd. for [M+H]  $\text{C}_{17}\text{H}_{24}\text{F}_3\text{O}_4$   $m/z$ : 349.1621, found: 349.1623. HPLC: Daicel CHIRALPAK OJ-H column, 1% IPA/Hexane, flow 0.75ml/min; (4R,5S)-ligand: 6.1 min (major), 6.5 min (minor).

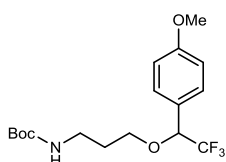

1-chloro-1-(3-(N-Bocamino)propoxy)-2,2,2-trifluoroethane (11c).

Used 291.7 mg of **4e** and 297 mg (268  $\mu$ l) of trimethoxy(4-methoxyphenyl) silane. Product isolated as colorless oil. Note: reaction time 5 days.

**Run 1:** 277 mg, 77% yield (80% by  $^{19}\text{F}$  NMR), 95% *ee*. **Run 2:** 280 mg, 78% yield (82% by  $^{19}\text{F}$  NMR), 94% *ee*.

$^1\text{H}$  NMR (300 MHz,  $\text{CDCl}_3$ ): 7.33(d,  $J^{\text{H-H}} = 8.5$  Hz, 2H), 6.92(d,  $J^{\text{H-H}} = 8.5$  Hz, 2H), 4.85, (bs, 1H), 4.53(q,  $J^{\text{H-F}} = 6.7$  Hz, 1H), 3.82(s, 1H), (m, 1H), 3.54(t,  $J^{\text{H-H}} = 5.8$  Hz, 2H), 3.15-3.32(m, 2H), 1.69-

1.87(m, 2H), 1.43(s, 9H). **<sup>13</sup>C NMR (151 MHz, CDCl<sub>3</sub>):** δ 160.7, 126.1, 129.6, 124.8, 124.(q, J<sup>C-F</sup>= 282 Hz), 114.2, 79.8(q, J<sup>C-F</sup>= 31.3 Hz), 68.7, 55.4, 38.4, 29.8, 28.5. **<sup>19</sup>F NMR (188 MHz, CDCl<sub>3</sub>):** δ -77.1 (d, J<sup>F-H</sup> = 6.7 Hz 3F). **R<sub>f</sub>** = 0.15 (10% EtOAc/Hexane). **HRMS(ESI, +MS)** calcd. for C<sub>17</sub>H<sub>24</sub>F<sub>3</sub>NO<sub>4</sub>Na [M+Na] m/z: 386.1550, found: 386.1550. **HPLC:** Daicel CHIRALPAK OJ-H column, 6% IPA/Hexane, flow 0.75ml/min; (4R,5S)-ligand: 20.1 min (major), 26.3 min (minor).

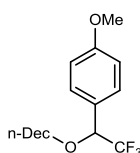

1-chloro-1-decyloxy-2,2,2-trifluoroethane(11d).

Used 288.7mg of **4f** and 297 mg (268 μl) of trimethoxy(4-methoxyphenyl) silane. Product isolated as colorless oil. Note: reaction time 72h.

**Run 1:** 327 mg, 91% yield (97% by <sup>19</sup>F NMR), 94% *ee*. **Run 2:** 324 mg, 91% yield (97% by <sup>19</sup>F NMR), 95% *ee*.

**<sup>1</sup>H NMR (300 MHz, CDCl<sub>3</sub>):** 7.34(d, J<sup>H-H</sup>= 8.5 Hz, 2H), 6.92(d, J<sup>H-H</sup>= 8.5 Hz, 2H), 4.52(q, J<sup>H-F</sup>= 6.7 Hz, 1H), 3.82(s, 3H), 3.47(t, J<sup>H-H</sup>= 6.6 Hz, 2H), 1.56-1.66(m, 2H), 1.16-1.98(m, 14H), 0.88(t, J<sup>H-H</sup>= 6.8 Hz, 3H). **<sup>13</sup>C NMR (151 MHz, CDCl<sub>3</sub>):** δ 160.5, 129.6, 125.3, 124.1(q, J<sup>C-F</sup>= 283 Hz), 114.1, 79.6(q, J<sup>C-F</sup>= 31 Hz), 70.7, 55.4, 32.0, 29.7, 29.6, 29.5, 26.0, 22.8, 14.2. **<sup>19</sup>F NMR (188 MHz, CDCl<sub>3</sub>):** δ -77.1 (d, J<sup>F-H</sup> = 6.7 Hz 3F). **R<sub>f</sub>** = 0.30 (10% DCM/Hexane). **HRMS(APCI, +MS)** calcd. for C<sub>19</sub>H<sub>30</sub>F<sub>3</sub>O<sub>2</sub> [M+H] m/z: 347.2198, found: 347.2200. **HPLC:** Daicel CHIRALPAK AD-H column, 1% IPA/Hexane, flow 0.75ml/min; (4R,5S)-ligand: 6.1 min (major), 6.5 min (minor).

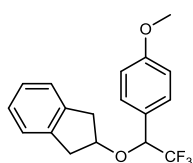

1-(4-methoxyphenyl)-1-(2-indanoxy)-2,2,2-trifluoroethane(11e).

Used 297 mg of trimethoxy(4-methoxyphenyl) silane and 251 mg of **4g**. Product isolated as colorless oil. Note: reaction time 72h.

**Run 1:** 304 mg, 94% yield (99% by <sup>19</sup>F NMR), 99% *ee*. **Run 2:** 302 mg, 94% yield (98% by <sup>19</sup>F NMR), 98% *ee*.

**<sup>1</sup>H NMR (500 MHz, CDCl<sub>3</sub>):** δ 7.37(d, J<sup>H-H</sup> = 8.7 Hz, 2H), 7.20(m, 1H), 7.10-7.18(m, 3H), 6.93(d, J<sup>H-H</sup> = 8.7 Hz, 2H), 4.69(q, J<sup>H-F</sup> = 6.7 Hz, 1H), 4.43(m, 1H), 3.83(s, 3H), 3.18 (dd, J<sup>H-H</sup>= 16 Hz, 6.5 Hz, 1H), 3.02-3.12(m, 2H), 2.95(dd, J<sup>H-H</sup>= 16.2 Hz, 5.2 Hz, 1H). **<sup>13</sup>C NMR (125 MHz, CDCl<sub>3</sub>):** δ 160.6, 140.5, 140.3, 129.7, 126.81, 126.78, 126.3, 124.8, 124.7, 124(q, J<sup>C-F</sup>= 280 Hz), 114.1, 80.2, 78.2(q, J<sup>C-F</sup>= 32 Hz), 55.4, 39.8, 38.9. **<sup>19</sup>F NMR (188 MHz, CDCl<sub>3</sub>):** δ -77.1 (d, J<sup>F-H</sup> = 6.7 Hz, 3F). **R<sub>f</sub>** = 0.24 (20%DCM/hexane). **HRMS(ES MS+)** calcd. for [M+H] C<sub>18</sub>H<sub>18</sub>O<sub>2</sub>F<sub>3</sub>, m/z: 323.1259, found: 323.1226. **HPLC:** Daicel CHIRALPAK OJ-H column, 7% IPA/Hexane, flow 0.75ml/min; (4R,5S)-ligand: 14.0 min (minor), 19.2 min (major).

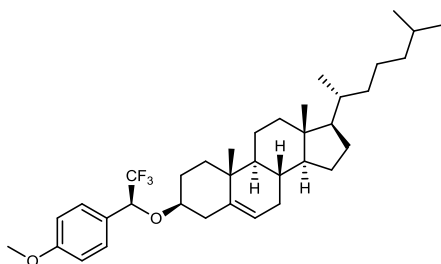

1-(4-methoxyphenyl)-1-(2-cholesteryloxy)-2,2,2-trifluoroethane(11f).

Used 297 mg of trimethoxy(4-methoxyphenyl) silane and 503 mg of **4h**. Product isolated as white solid. Note: reaction time 72h.

**Run 1:** 498 mg, 87% yield (94% by  $^{19}\text{F}$  NMR), 95% *dr*. **Run 2:** 506 mg, 88% yield (93% by  $^{19}\text{F}$  NMR), 96% *dr*.

**(S)-ligand:  $^1\text{H}$  NMR (500 MHz,  $\text{CDCl}_3$ ):**  $\delta$  7.37(d,  $J^{\text{H-H}} = 8.7$  Hz, 2H), 6.91(d,  $J^{\text{H-H}} = 8.7$  Hz, 2H), 5.24(m, 1H), 4.69(q,  $J^{\text{H-F}} = 6.9$  Hz, 1H), 3.82(s, 3H), 3.26(m, 1H), 2.30(m, 1H), 2.16(m, 1H), 1.89-2.02(m, 3H), 1.76-1.89(m, 2H), 1.19-1.61(m, 14H), 1-1.18(m, 6H), 0.99(s, 3H), 0.92-0.99(m, 2H), 0.9(d,  $J^{\text{H-H}} = 6.5$  Hz, 3H), 0.859(d,  $J^{\text{H-H}} = 6.6$  Hz, 3H), 0.855(d,  $J^{\text{H-H}} = 6.6$  Hz, 3H), 0.659(s, 3H).  **$^{13}\text{C}$  NMR (125 MHz,  $\text{CDCl}_3$ ):**  $\delta$  160.3, 140.5, 129.5, 126, 124.2(q,  $J^{\text{C-F}} = 282$  Hz), 122.1, 114, 78.9, 76.6(q,  $J^{\text{C-F}} = 30.5$  Hz), 56.9, 56.3, 55.4, 50.2, 42.4, 39.9, 39.8, 39.7, 37.1, 36.9, 36.3, 35.9, 32.00, 31.95, 28.3, 28.2, 27.6, 24.4, 23.9, 23.0, 22.7, 21.2, 19.5, 18.6, 12.0.  **$^{19}\text{F}$  NMR (188 MHz,  $\text{CDCl}_3$ ):**  $\delta$  -77.3 (d,  $J^{\text{F-H}} = 6.8$  Hz, 3F).  $R_f = 0.16$  (hexane). X-ray suitable crystal was obtained by slow cooling of methanol solution: long white needles.

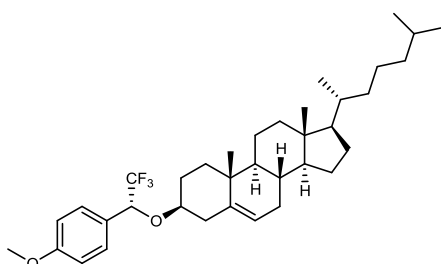

**(R)-ligand:  $^1\text{H}$  NMR (500 MHz,  $\text{CDCl}_3$ ):**  $\delta$  7.37(d,  $J^{\text{H-H}} = 8.7$  Hz, 2H), 6.91(d,  $J^{\text{H-H}} = 8.7$  Hz, 2H), 5.35(m, 1H), 4.69(q,  $J^{\text{H-F}} = 6.9$  Hz, 1H), 3.82(s, 3H), 3.26(m, 1H), 2.42(m, 1H), 2.31(m, 1H), 1.92-2.02(m, 2H), 1.73-1.86(m, 2H), 1.67-1.74(m, 1H), 1.20-1.6(m, 12H), 1.0-1.18(m, 6H), 0.99(s, 3H), 0.91-0.99(m, 2H), 0.898(d,  $J^{\text{H-H}} = 6.5$  Hz, 3H), 0.861(d,  $J^{\text{H-H}} = 6.6$  Hz, 3H), 0.856(d,  $J^{\text{H-H}} = 6.6$  Hz, 3H), 0.66(s, 3H).

**$^{13}\text{C}$  NMR (125 MHz,  $\text{CDCl}_3$ ):**  $\delta$  160.4, 140.4, 129.5, 126, 124.2(q,  $J^{\text{C-F}} = 28$  Hz), 122.3, 114, 78.9, 76.9(q,  $J^{\text{C-F}} = 31.1$  Hz), 56.9, 56.3, 55.4, 50.2, 44.4, 39.9, 39.7, 38.4, 37.2, 36.9, 36.3, 35.9, 32.05, 31.96, 29.4, 28.4, 28.2, 24.4, 23.9, 23.0, 22.7, 21.2, 19.5, 18.8, 12.0.  **$^{19}\text{F}$  NMR (188 MHz,  $\text{CDCl}_3$ ):**  $\delta$  -77.3 (d,  $J^{\text{F-H}} = 6.8$  Hz, 3F).  $R_f = 0.16$  (hexane). **HRMS** (APCI, +MS), calcd. for  $[\text{M}+\text{H}]$   $\text{C}_{36}\text{H}_{54}\text{F}_3\text{O}_2$   $m/z$ : 575.4070, found: 575.4048. **HPLC:** Phenomenex Lux Cellulose-3 column, 0% IPA/Hexane, flow 0.4 ml/min; (4R,5S)-ligand: 58.3 min (minor), 58.5 min (major).

## Deprotection of ethers and absolute configuration determination

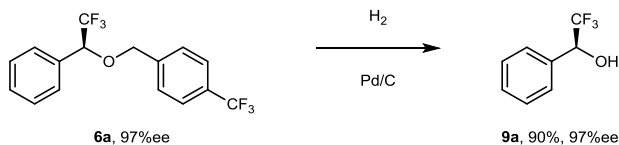

**Supplementary figure 1.** Deprotection of benzylic ether **6a** by palladium-on-carbon-catalyzed hydrogenation.

The mixture 50 mg of **6a** (97% ee) and 10 mg of Pd/C in 1 ml of ethanol was stirred under 3 atm. of hydrogen for one day. After completion of the reaction, the reaction mixture was filtered through celite, washed with ethanol and subjected to preparative TLC (eluent DCM) to give **9a** 24 mg (90% yield, 97% ee).

Spectroscopic data corresponds to previously reported data.<sup>12</sup> **HPLC:** Daicel CHIRALPAK OJ-H column, 13% IPA/Hexane, flow 0.75ml/min; (4*S*,5*R*)-ligand **7a**: 12.7 min (minor), 16.3 min (major). Comparison with commercial sample of (*R*)-**6a** (12.7 min major, 16.4 min minor) gives (*S*)-configuration of **9a** and **6a**.

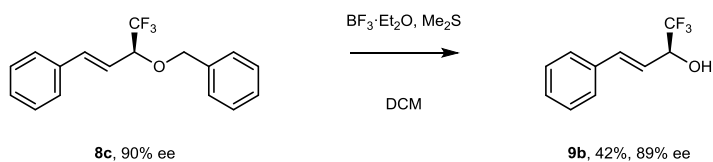

**Supplementary figure 2.** Deprotection of **8c** by means of BF<sub>3</sub> etherate with dimethylsulphide to give allylic alcohol **9b**.

The deprotection was performed by literature procedure, starting from 50 mg of **8c** (90% ee).<sup>13</sup> After preparative TLC **9b** was obtained in 14 mg (42% yield, 89% ee).

Spectroscopic data corresponds to previously reported data.<sup>12</sup> **HPLC:** Daicel CHIRALPAK OJ-H column, 5% IPA/Hexane, flow 1 ml/min; (4*R*)-ligand **7g**: 16.4 min (major), 20.1 min (minor). Comparison with literature data gives (*R*)-configuration of **9b** and for **8c**.

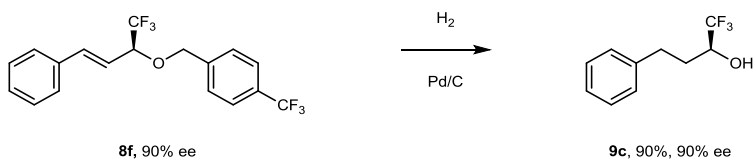

**Supplementary figure 3.** One-pot reductive deprotection of **8f** with hydrogen and palladium on carbon to give alkyl alcohol **9c**.

Reaction was performed similar to the **6d**, using 50 mg of **8f** (90% ee). After preparative TLC **9c** was obtained in 25 mg (90% yield, 90% ee).

Spectroscopic data corresponds to previously reported data.<sup>14</sup> **HPLC:** Daicel Phenomex Lux Cellulose-3 column, 1% IPA/Hexane, flow 1 ml/min; (4*R*)-ligand **7g**: 37.55 min (major), 39.47 min (minor).

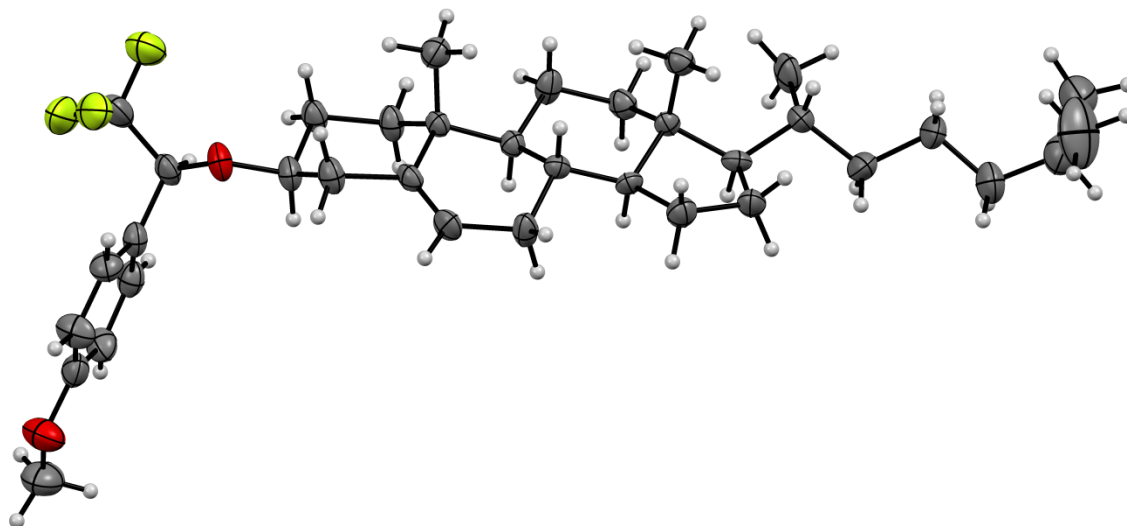

**Supplementary figure 4.** ORTEP drawing of **11f** with thermal ellipsoids at 50% probability level (CCDC 1854431). The second molecule of the unit cell is omitted for clarity. **11f** was obtained using (4*S*,5*R*)-**7a** as a ligand, giving (*S*)-configuration of newly formed asymmetric center.

## Supplementary figures

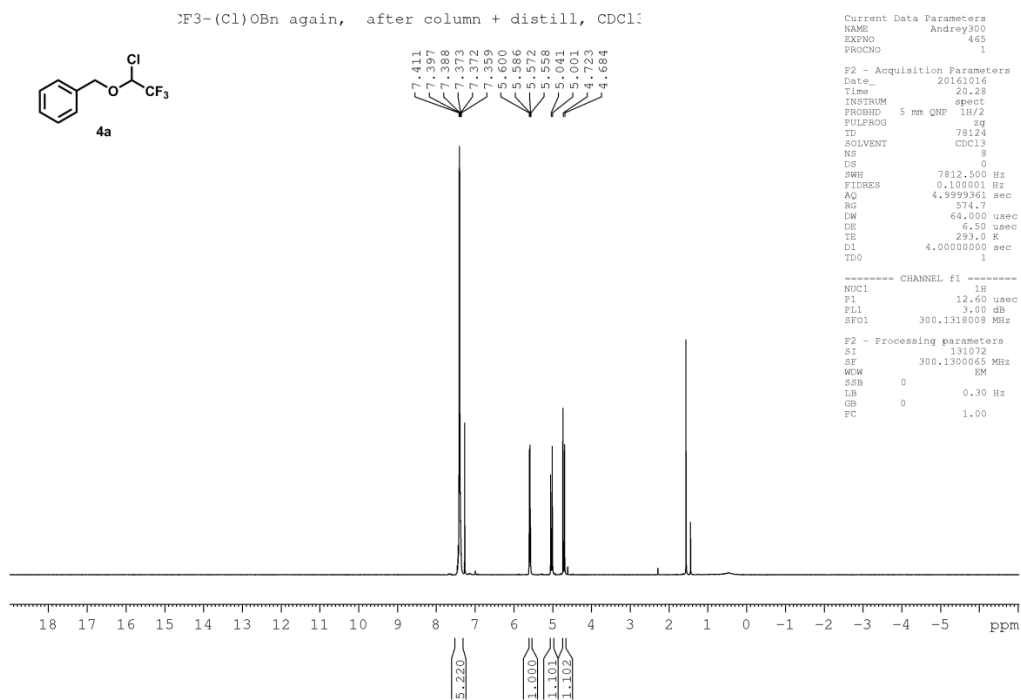

Supplementary figure 5.  $^1\text{H}$  NMR spectra of **4a** in  $\text{CDCl}_3$

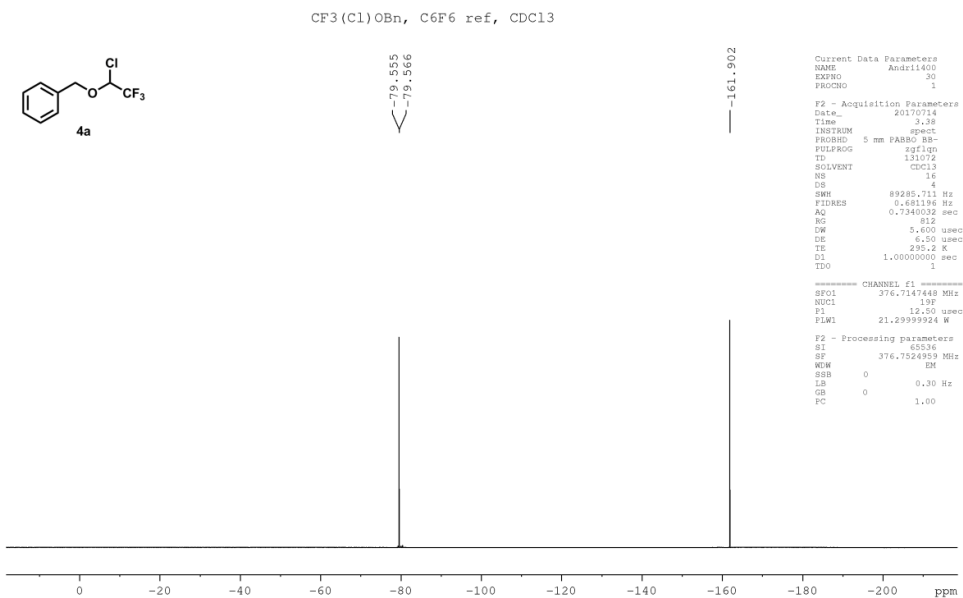

Supplementary figure 6.  $^{19}\text{F}$  NMR spectra of **4a** in  $\text{CDCl}_3$

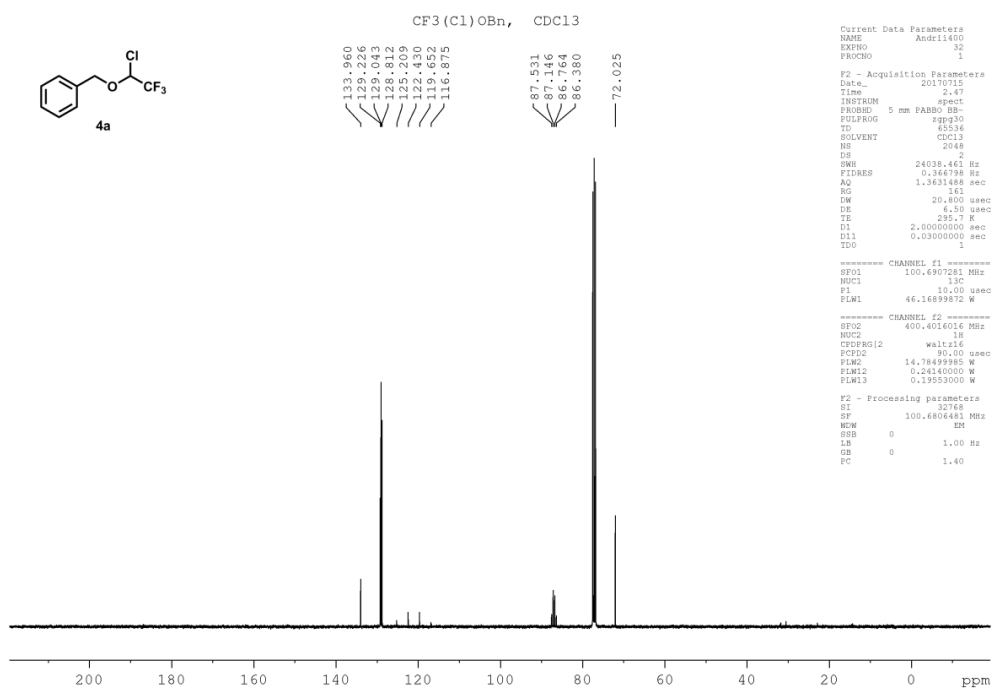

Supplementary figure 7. <sup>13</sup>C NMR spectra of **4a** in CDCl<sub>3</sub>

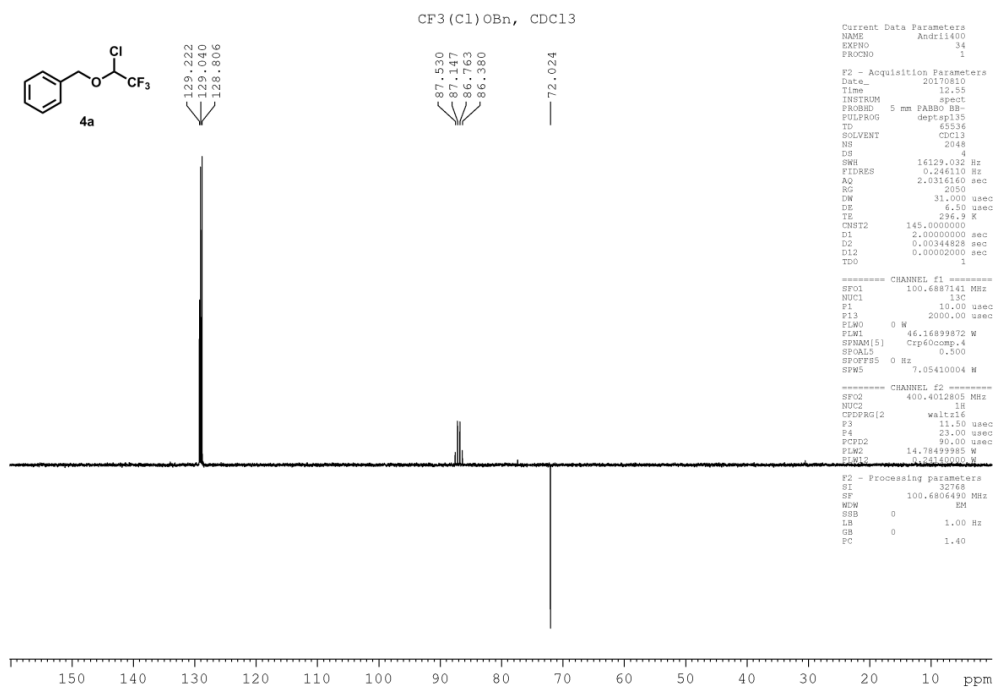

Supplementary figure 8. DEPT-135 NMR spectra of **4a** in CDCl<sub>3</sub>



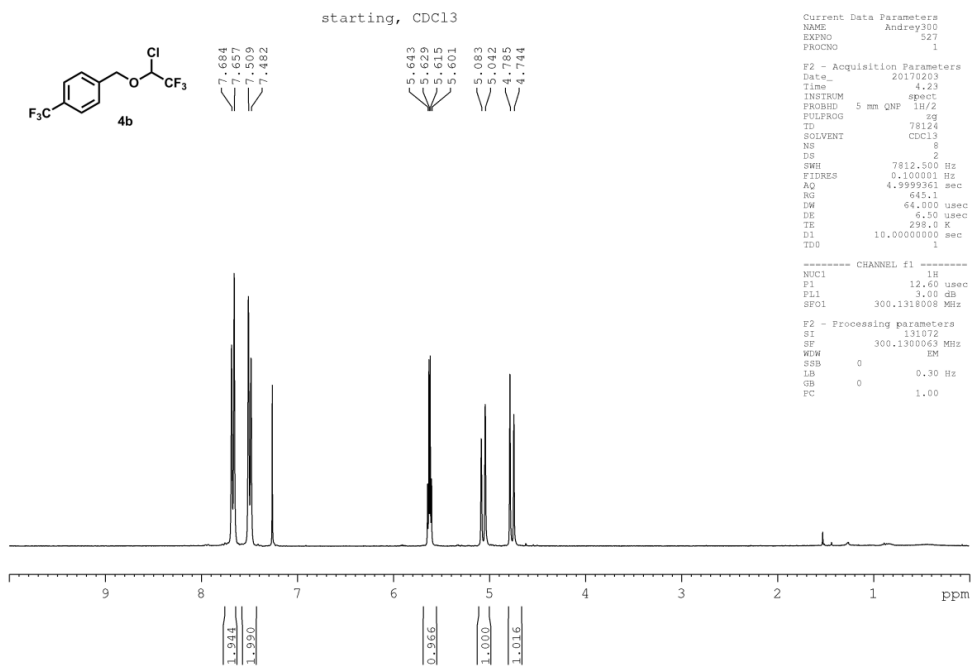

Supplementary figure 9. <sup>1</sup>H NMR spectra of **4b** in CDCl<sub>3</sub>

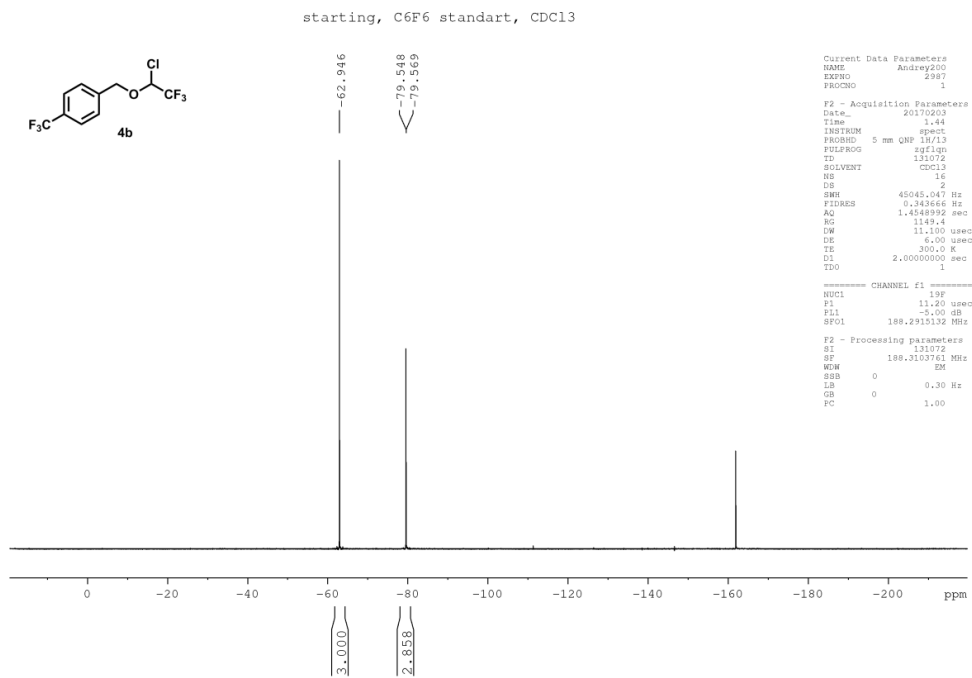

Supplementary figure 10. <sup>19</sup>F NMR spectra of **4b** in CDCl<sub>3</sub>

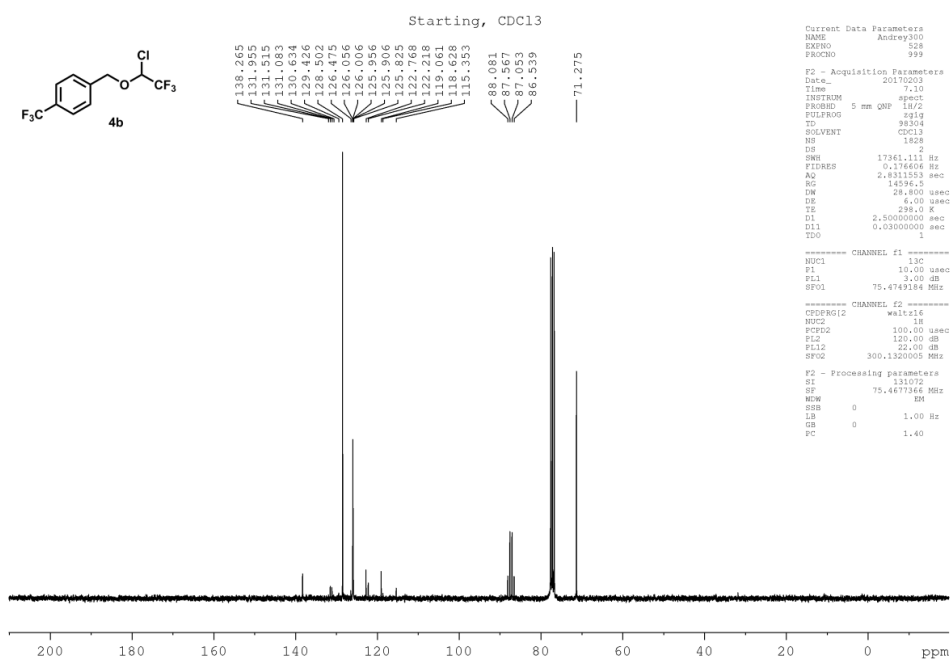

Supplementary figure 11. <sup>13</sup>C NMR spectra of **4b** in CDCl<sub>3</sub>

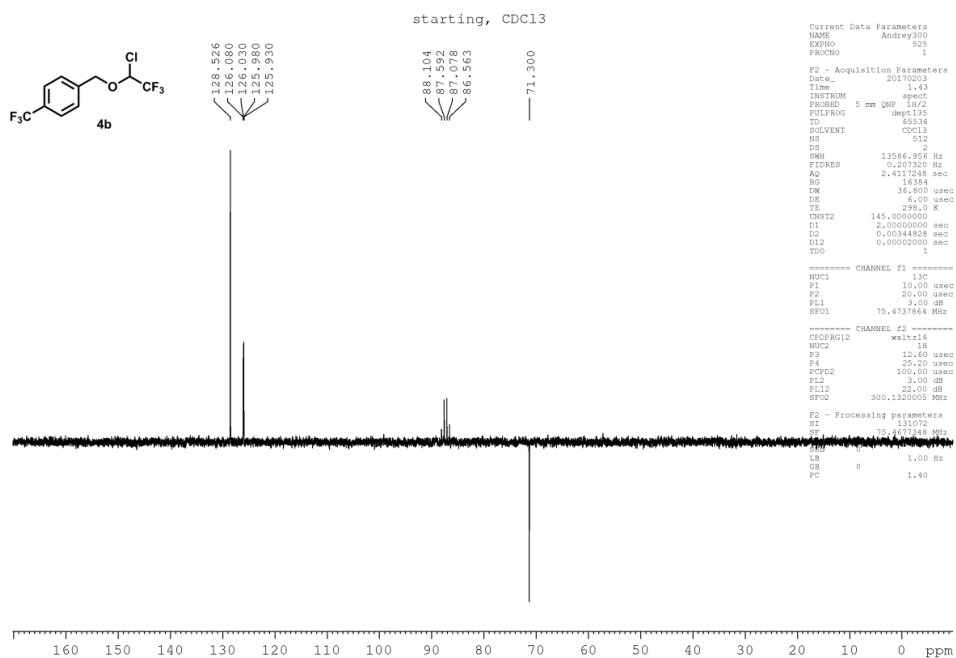

Supplementary figure 12. DEPT-135 NMR spectra of **4b** in CDCl<sub>3</sub>

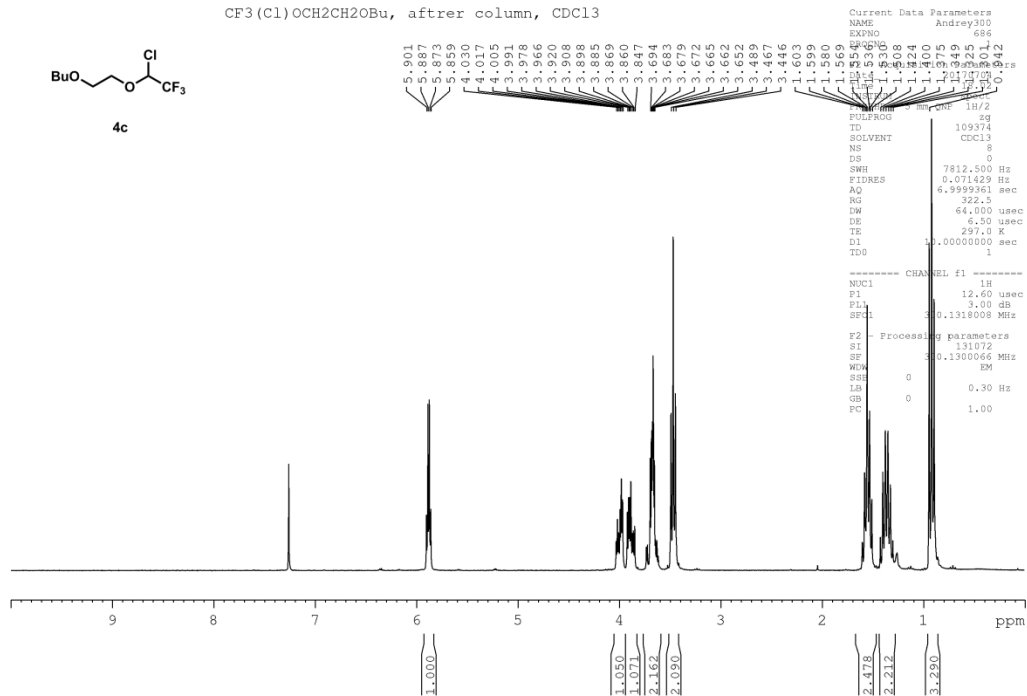

Supplementary figure 13.  $^1\text{H}$  NMR spectra of **4c** in  $\text{CDCl}_3$

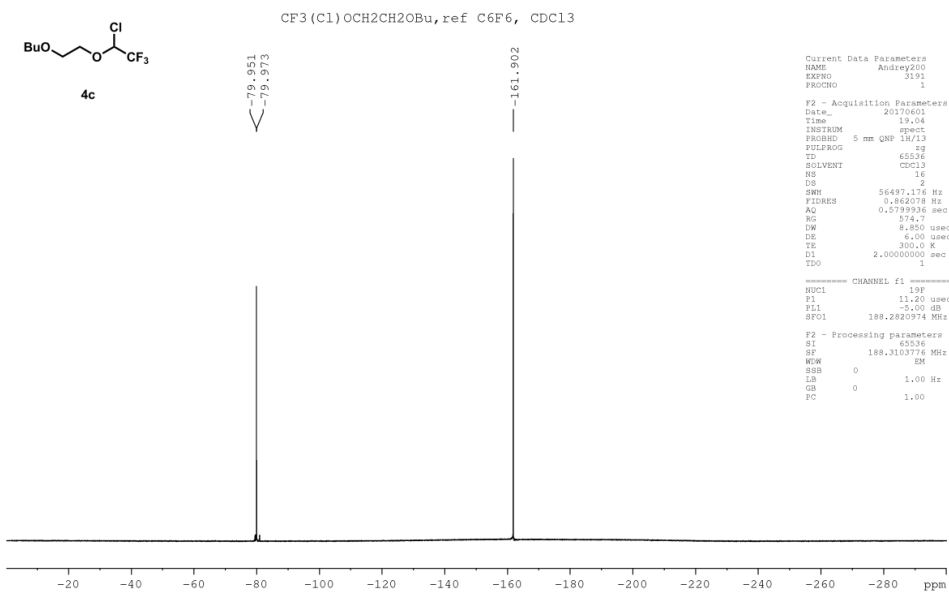

Supplementary figure 14.  $^{19}\text{F}$  NMR spectra of **4c** in  $\text{CDCl}_3$

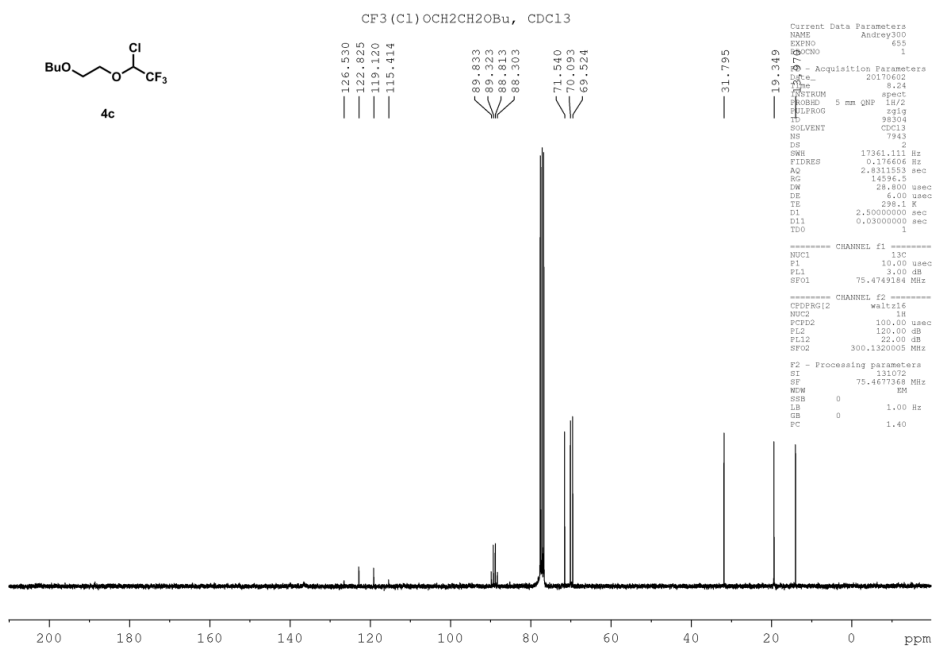

Supplementary figure 15.  $^{13}\text{C}$  NMR spectra of **4c** in  $\text{CDCl}_3$

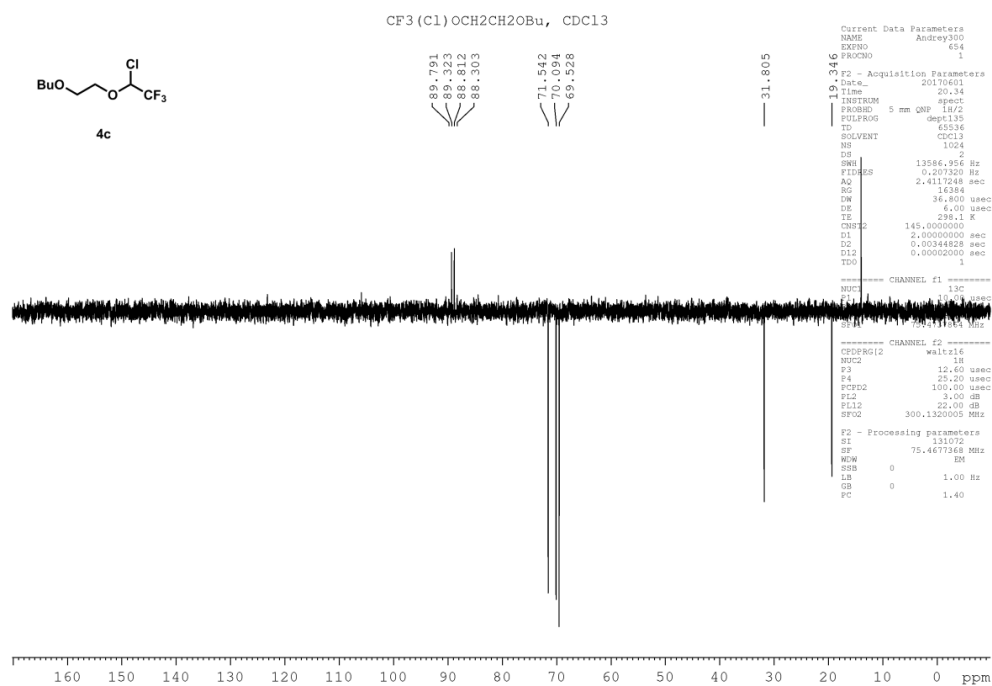

Supplementary figure 16. DEPT-135 NMR spectra of **4c** in  $\text{CDCl}_3$

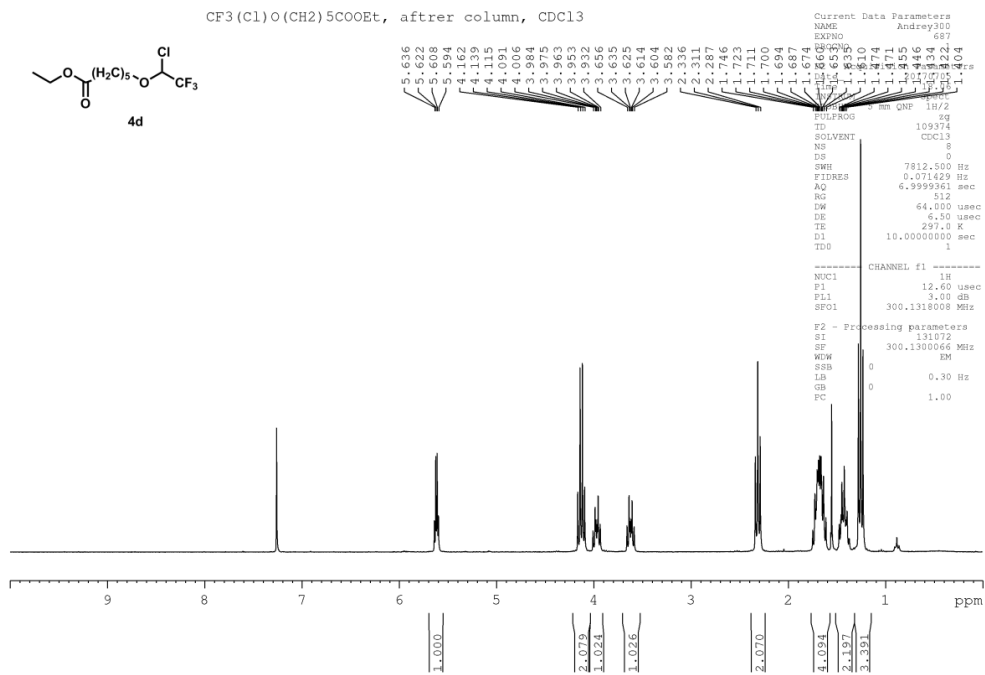

Supplementary figure 17. <sup>1</sup>H NMR spectra of **4d** in CDCl<sub>3</sub>

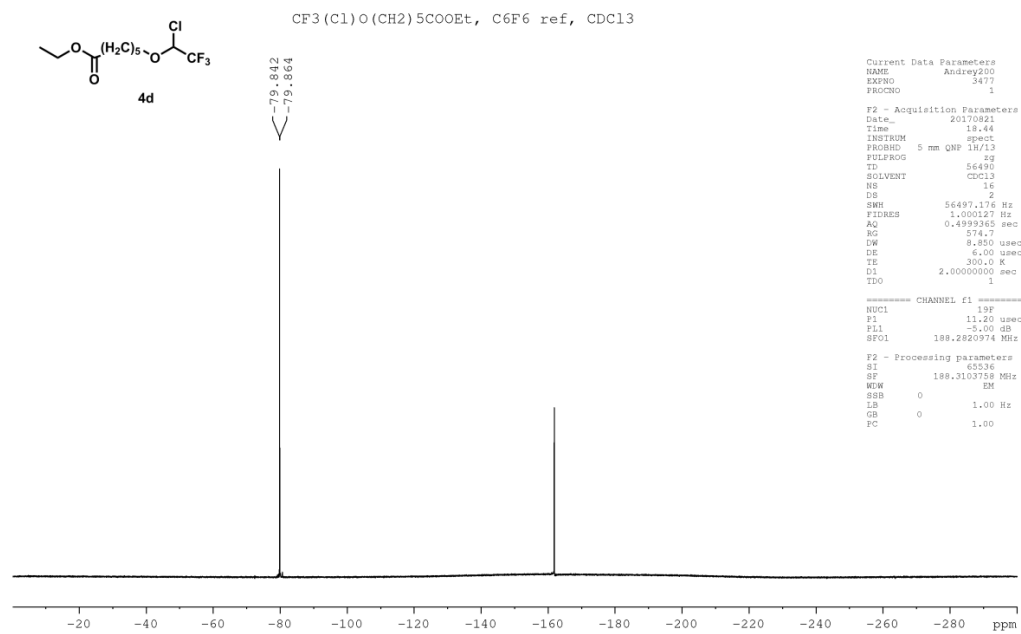

Supplementary figure 18. <sup>19</sup>F NMR spectra of **4d** in CDCl<sub>3</sub>

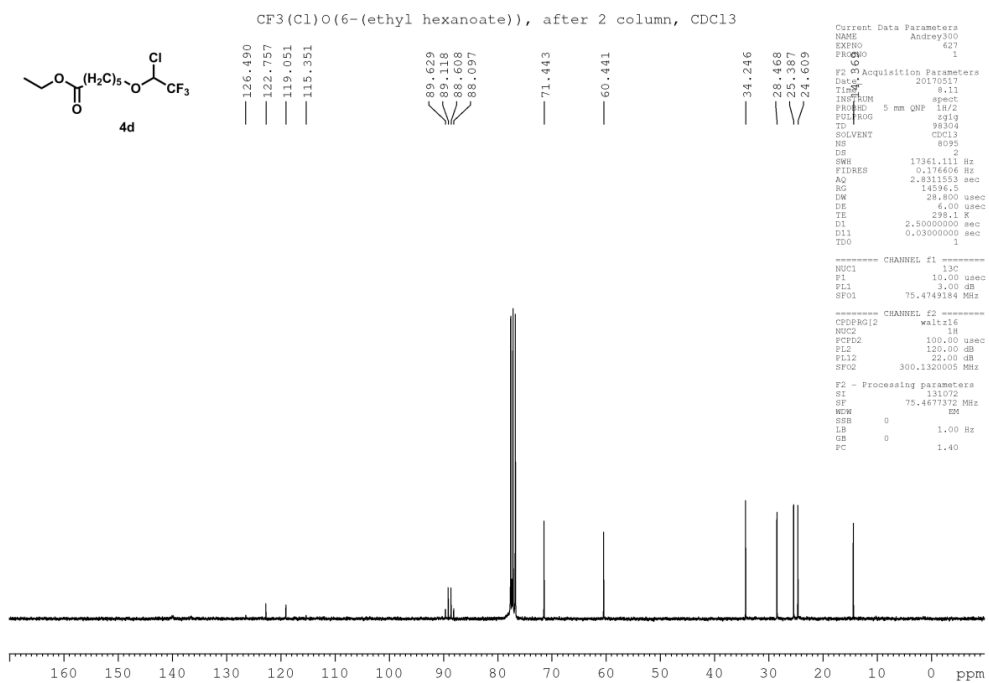

Supplementary figure 19. <sup>13</sup>C NMR spectra of **4d** in CDCl<sub>3</sub>

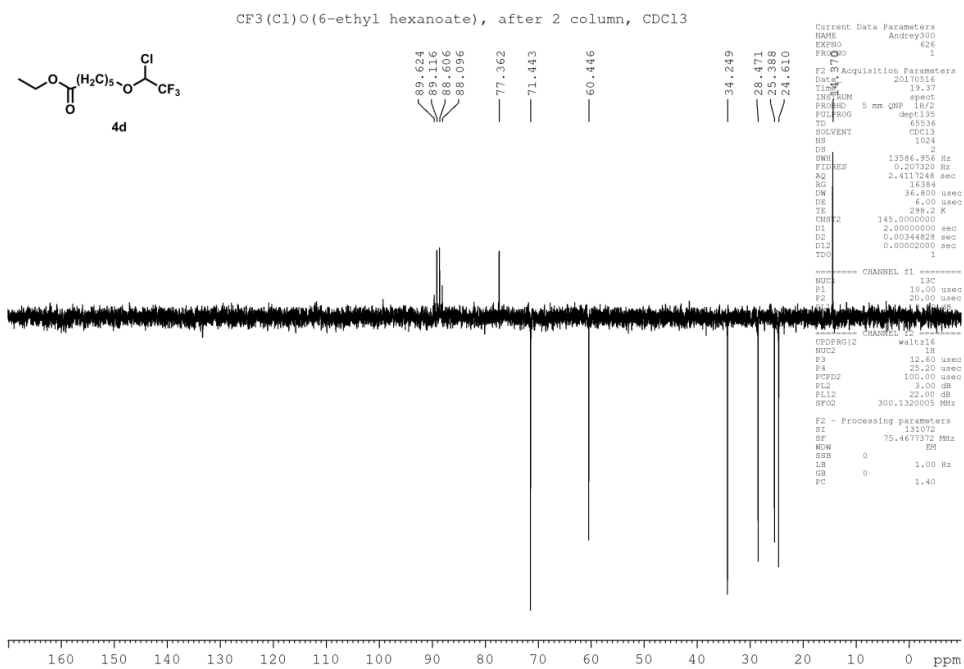

Supplementary figure 20. DEPT-135 NMR spectra of **4d** in CDCl<sub>3</sub>

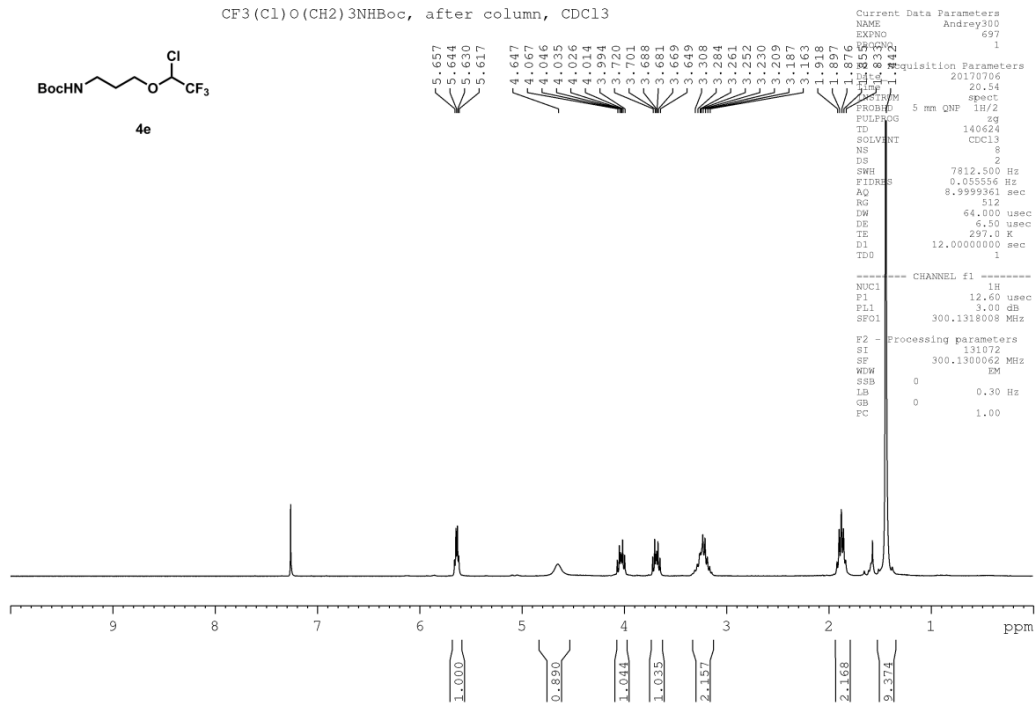

Supplementary figure 21. <sup>1</sup>H NMR spectra of **4e** in CDCl<sub>3</sub>

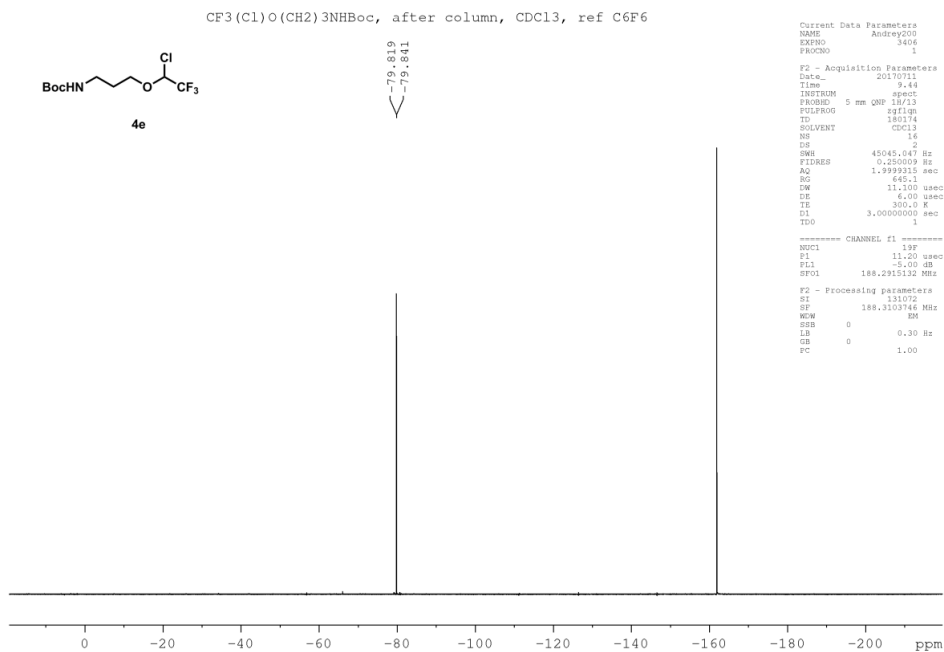

Supplementary figure 22. <sup>19</sup>F NMR spectra of **4e** in CDCl<sub>3</sub>

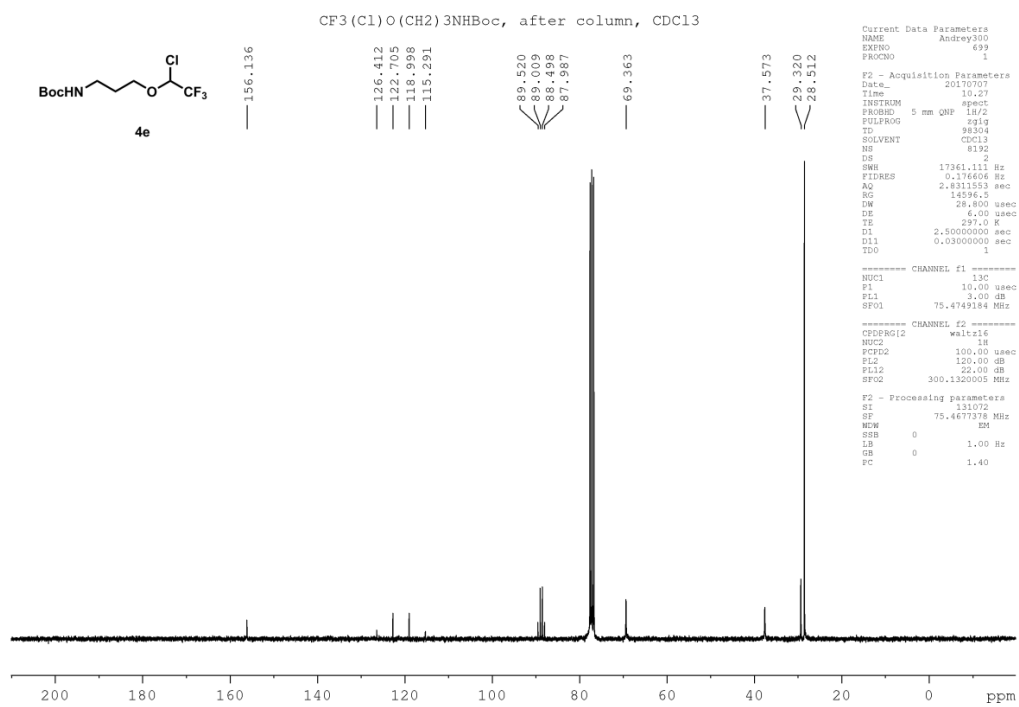

Supplementary figure 23. <sup>13</sup>C NMR spectra of **4e** in CDCl<sub>3</sub>

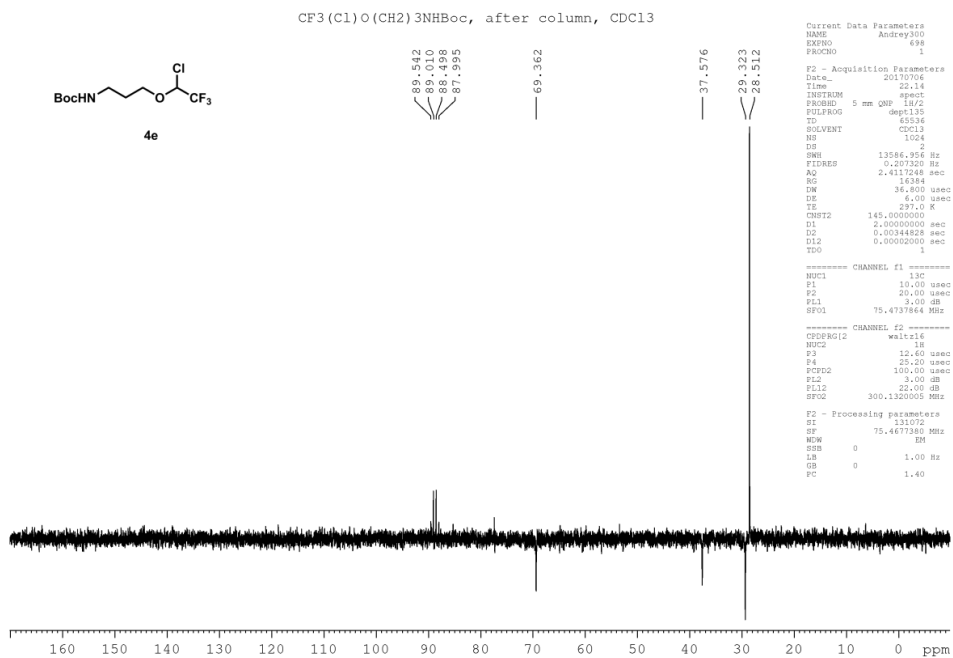

Supplementary figure 24. DEPT-135 NMR spectra of **4e** in CDCl<sub>3</sub>



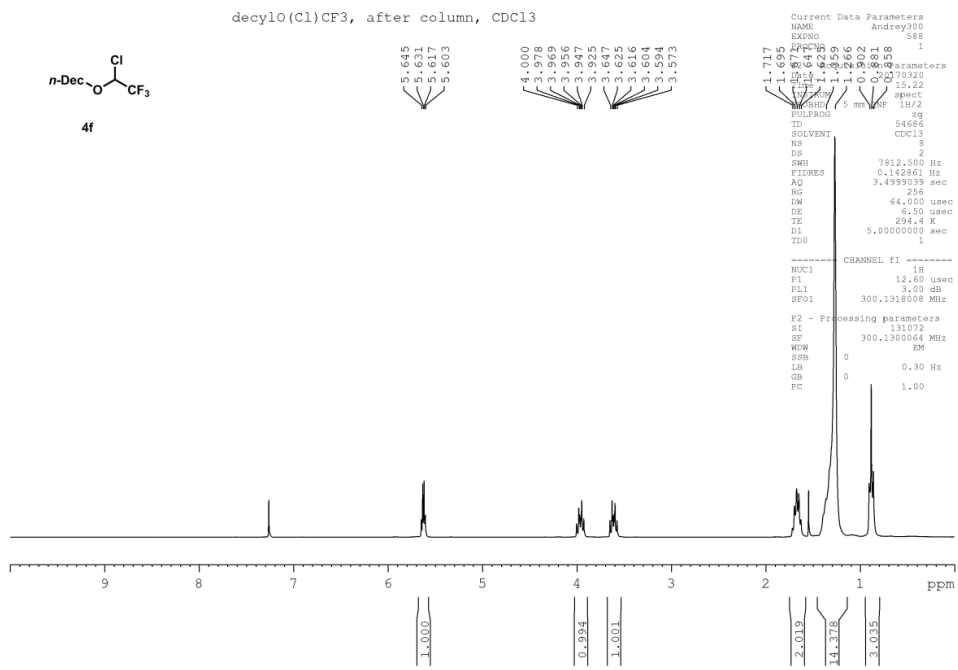

Supplementary figure 25. <sup>1</sup>H NMR spectra of **4f** in CDCl<sub>3</sub>

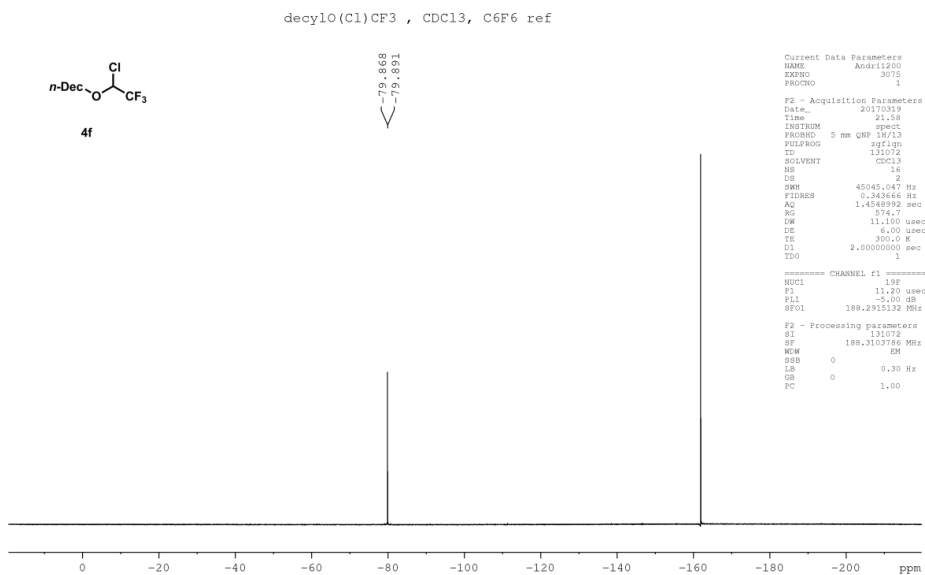

Supplementary figure 26. <sup>19</sup>F NMR spectra of **4f** in CDCl<sub>3</sub>



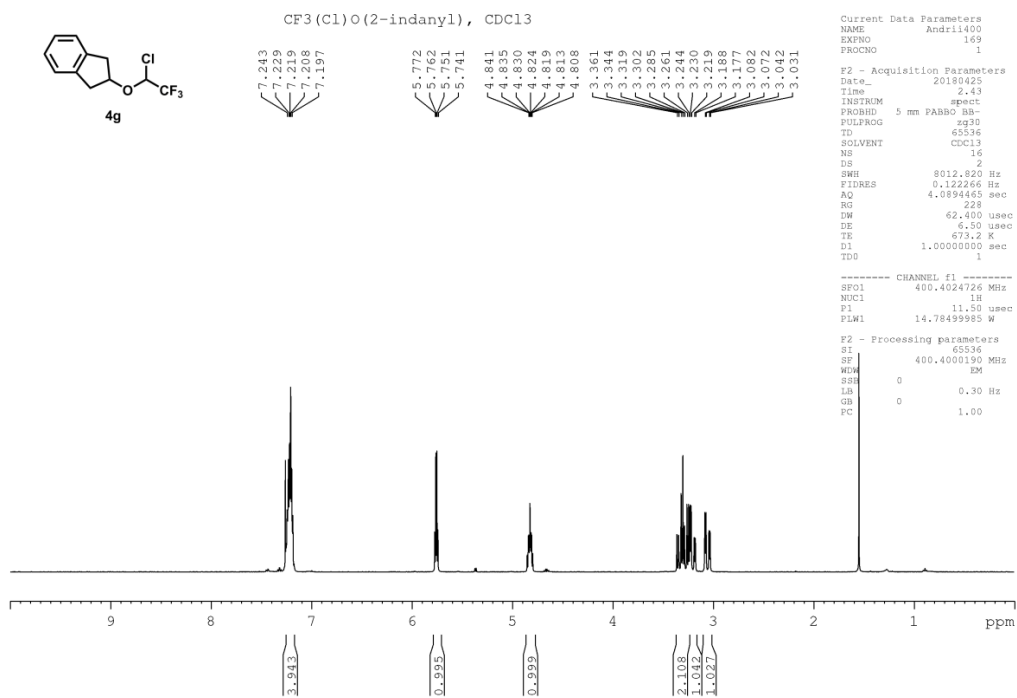

Supplementary figure 29. <sup>1</sup>H NMR spectra of **4g** in CDCl<sub>3</sub>

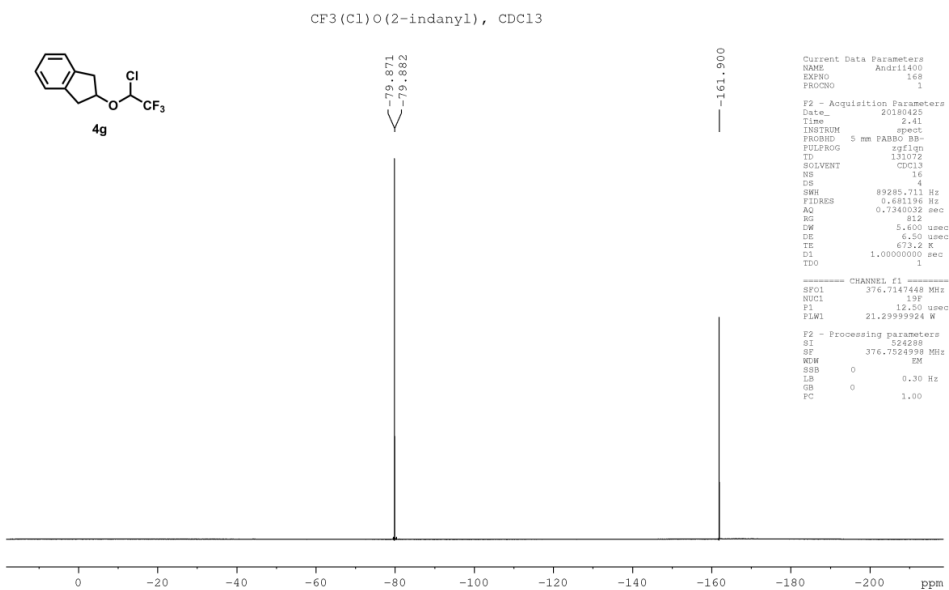

Supplementary figure 30. <sup>19</sup>F NMR spectra of **4g** in CDCl<sub>3</sub>

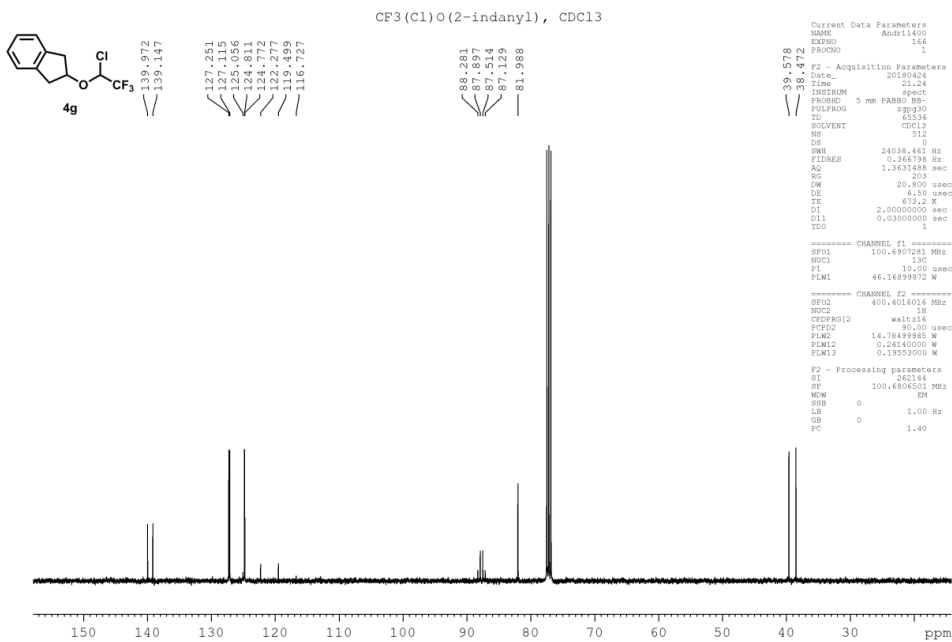

Supplementary figure 31. <sup>13</sup>C NMR spectra of 4g in CDCl<sub>3</sub>

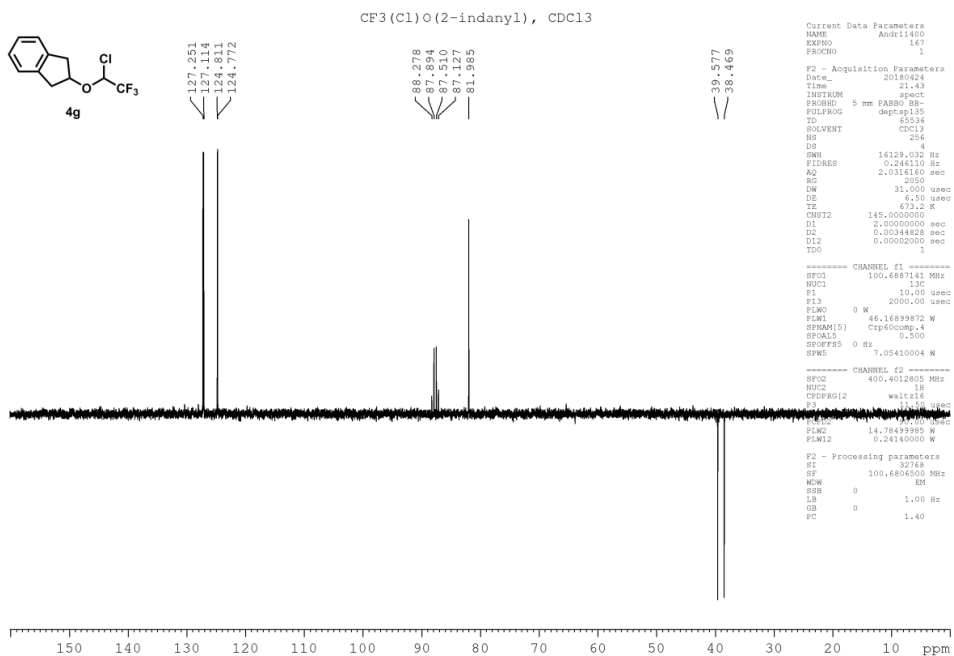

Supplementary figure 32. DEPT-135 NMR spectra of 4g in CDCl<sub>3</sub>





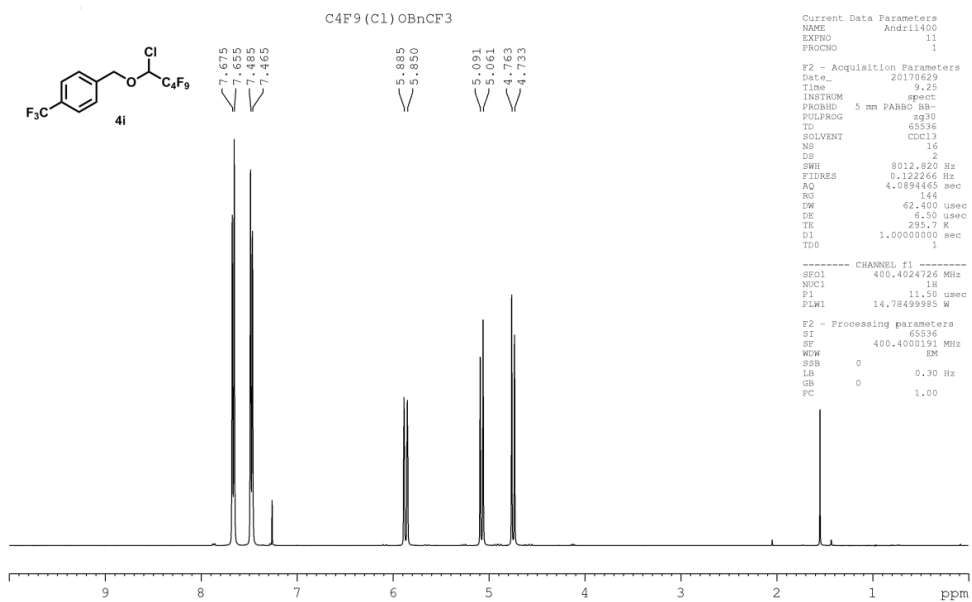

Supplementary figure 37  $^1\text{H}$  NMR spectra of **4i** in  $\text{CDCl}_3$

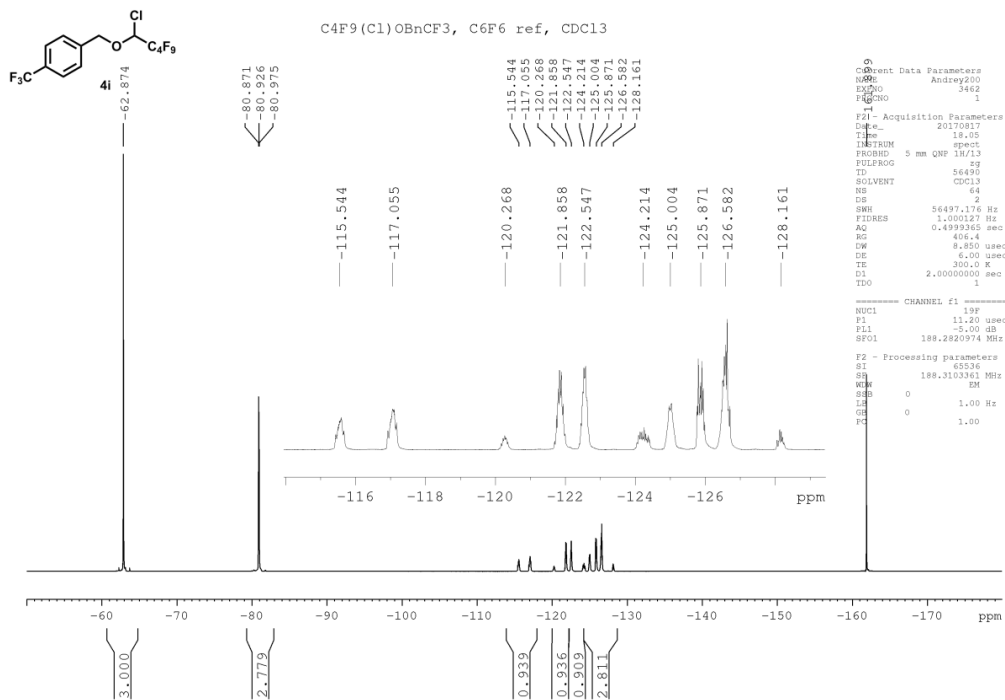

Supplementary figure 38.  $^{13}\text{C}$  NMR spectra of **4i** in  $\text{CDCl}_3$

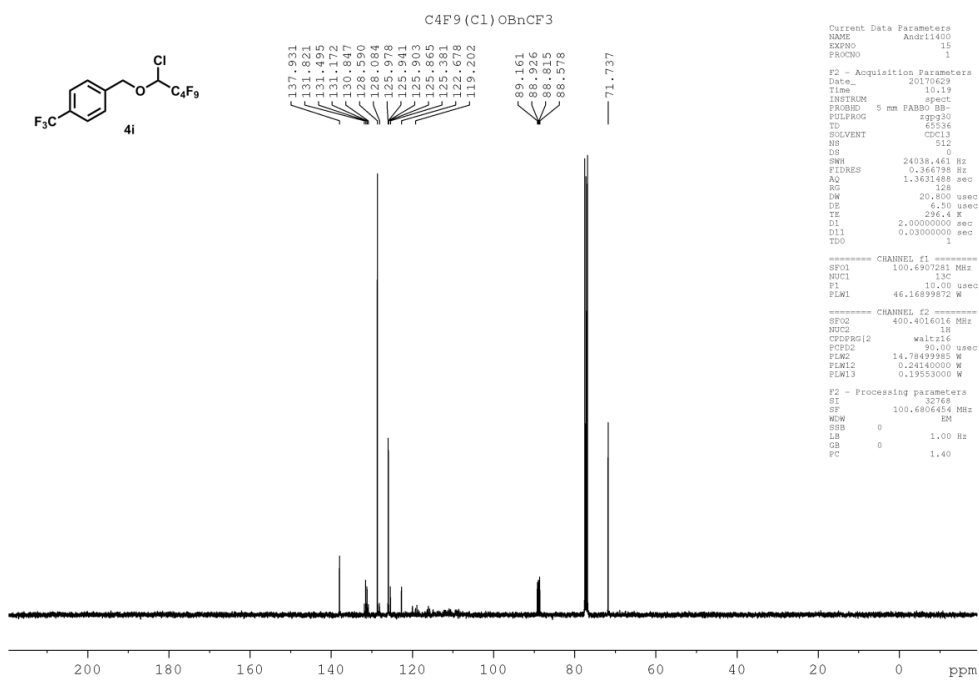

Supplementary figure 39.  $^{13}\text{C}$  NMR spectra of **4i** in  $\text{CDCl}_3$

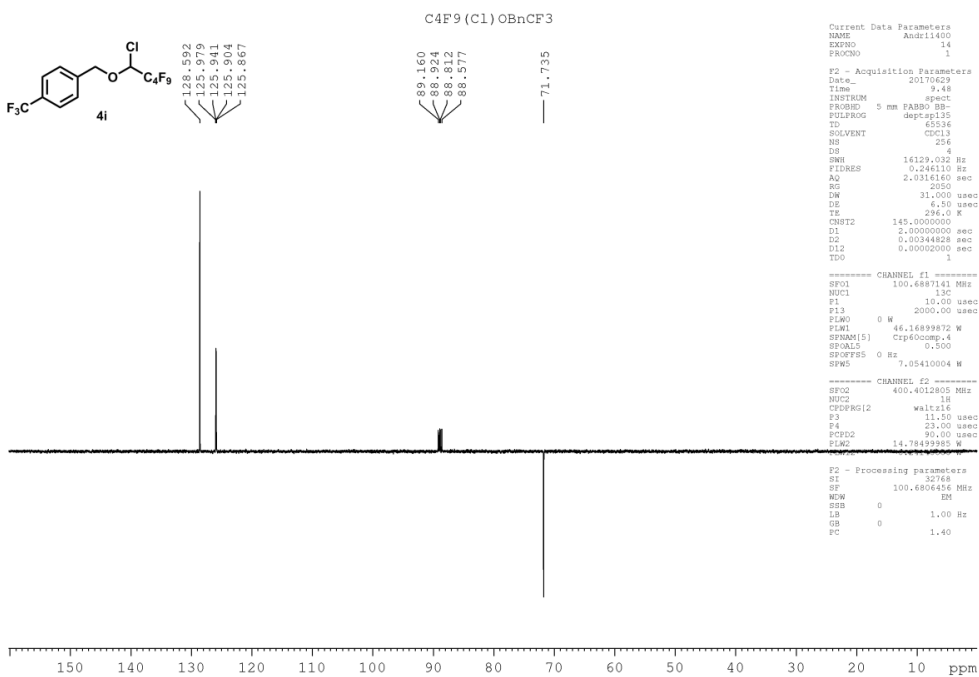

Supplementary figure 40. DEPT-135 NMR spectra of **4i** in  $\text{CDCl}_3$



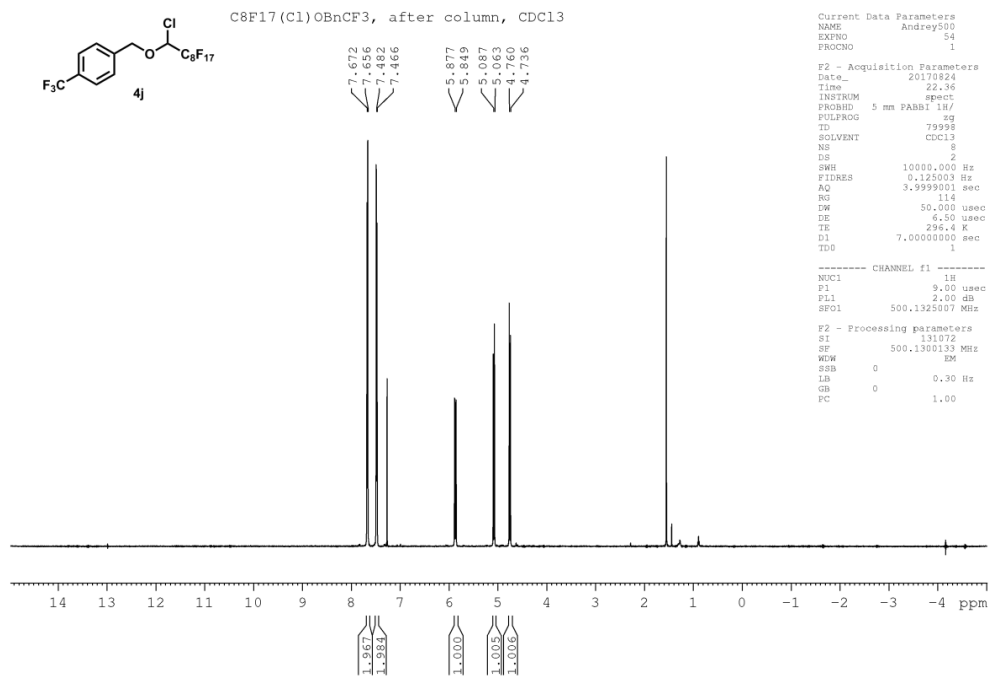

Supplementary figure 41.  $^1\text{H}$  NMR spectra of **4j** in  $\text{CDCl}_3$

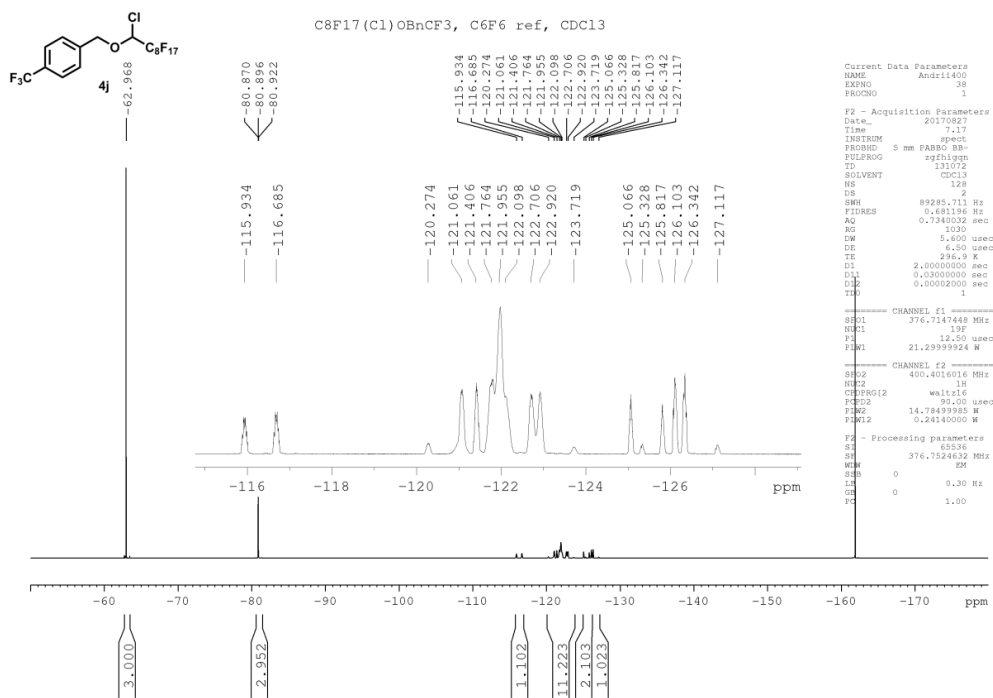

Supplementary figure 42.  $^{19}\text{F}$  NMR spectra of **4j** in  $\text{CDCl}_3$

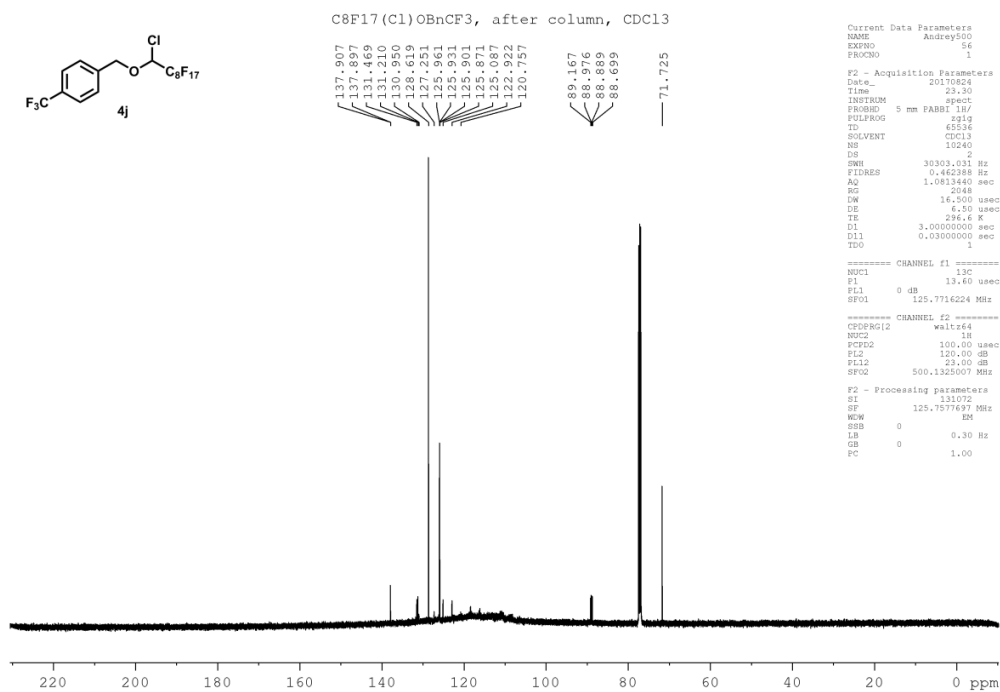

Supplementary figure 43.  $^{13}\text{C}$  NMR spectra of **4j** in  $\text{CDCl}_3$

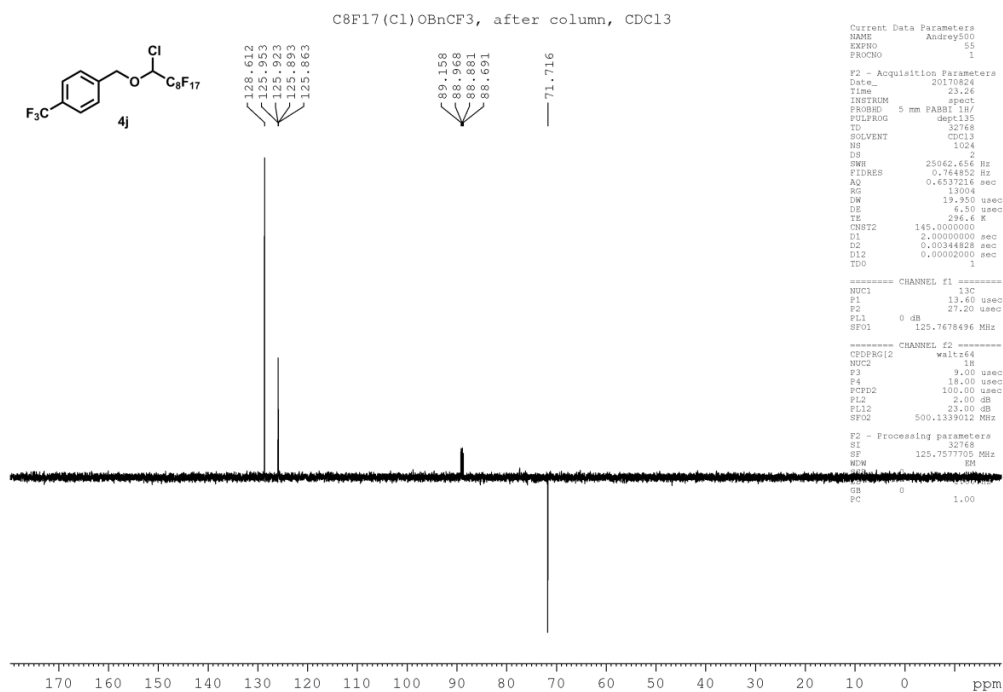

Supplementary figure 44. DEPT-135 NMR spectra of **4j** in  $\text{CDCl}_3$

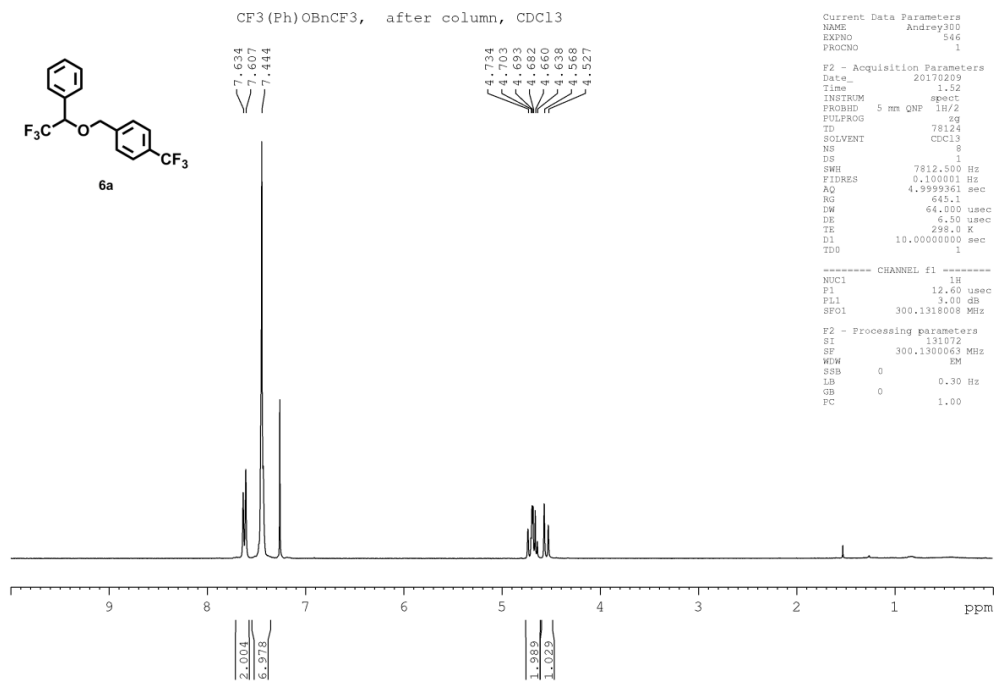

Supplementary figure 45.  $^1\text{H}$  NMR spectra of **6a** in  $\text{CDCl}_3$

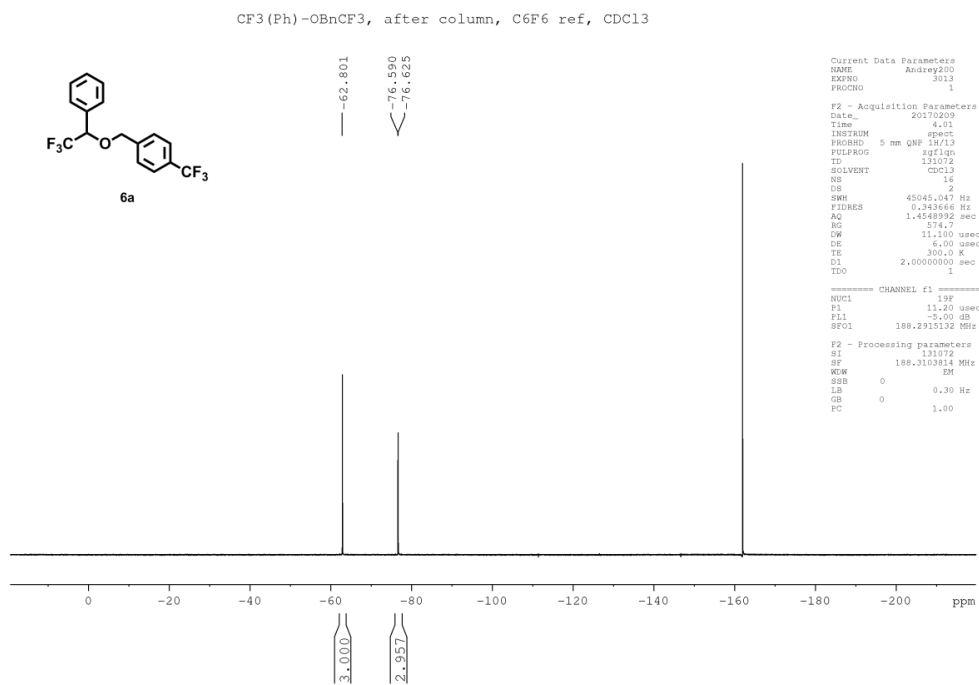

Supplementary figure 46.  $^{19}\text{F}$  NMR spectra of **6a** in  $\text{CDCl}_3$

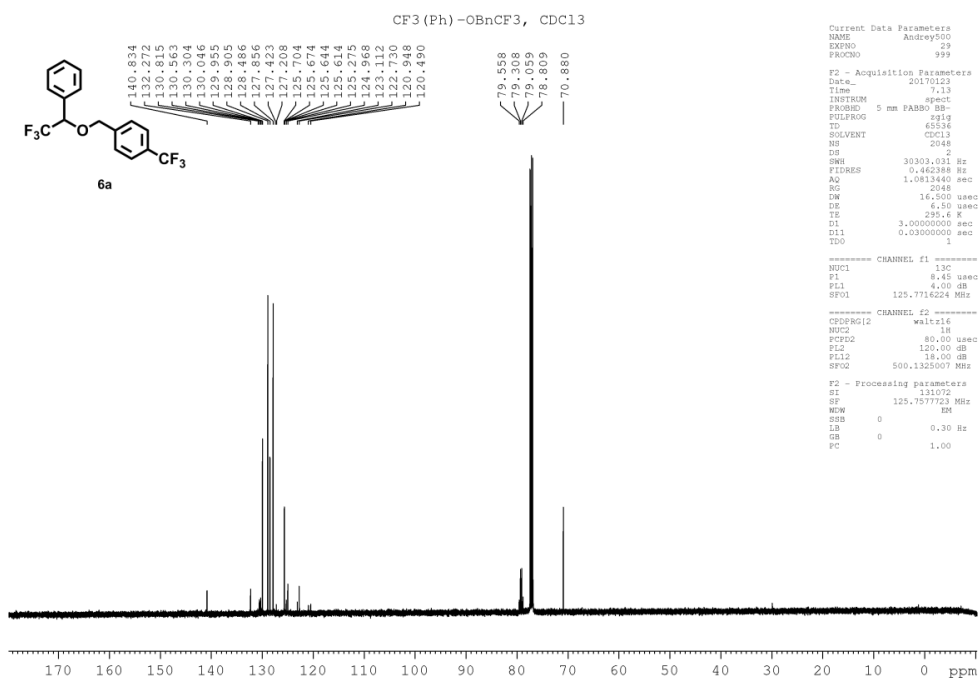

Supplementary figure 47. <sup>13</sup>C NMR spectra of **4e** in CDCl<sub>3</sub>

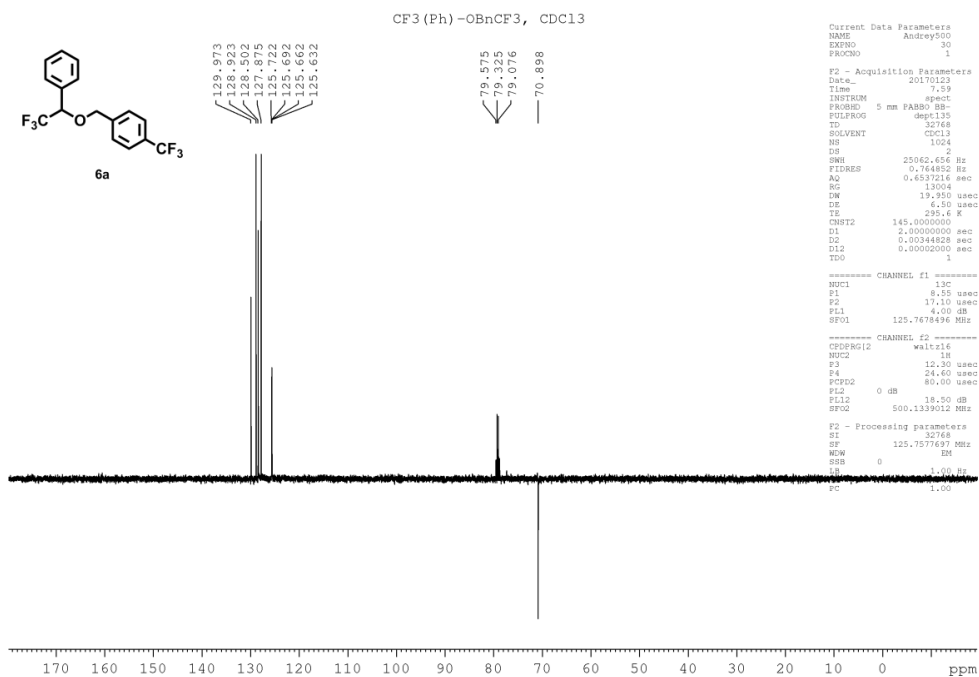

Supplementary figure 48. DEPT-135 NMR spectra of **6a** in CDCl<sub>3</sub>

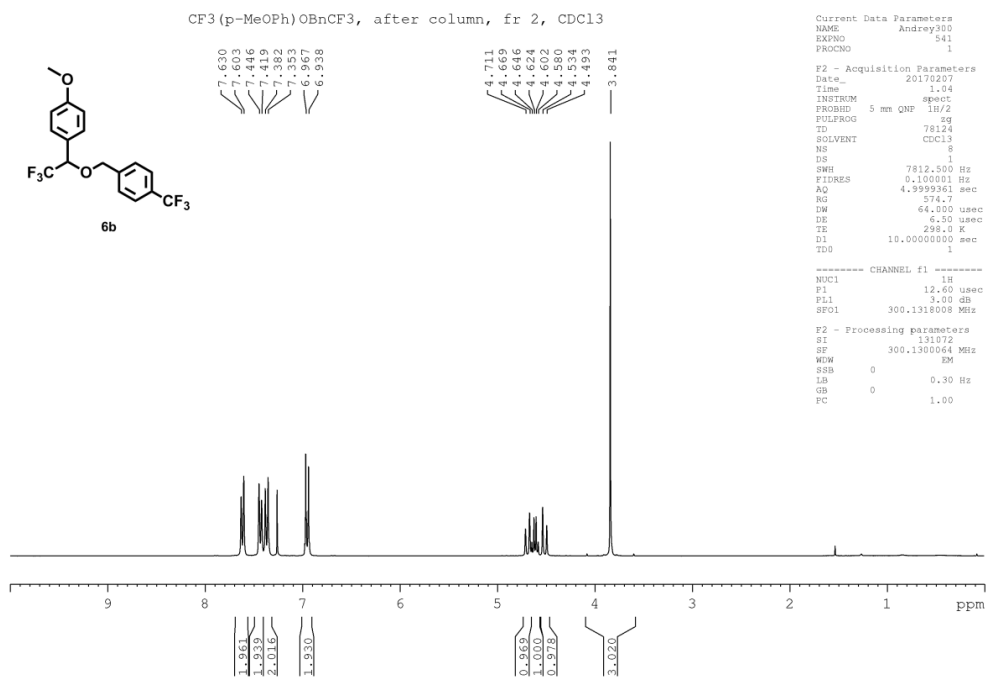

Supplementary figure 49.  $^1\text{H}$  NMR spectra of **6b** in  $\text{CDCl}_3$

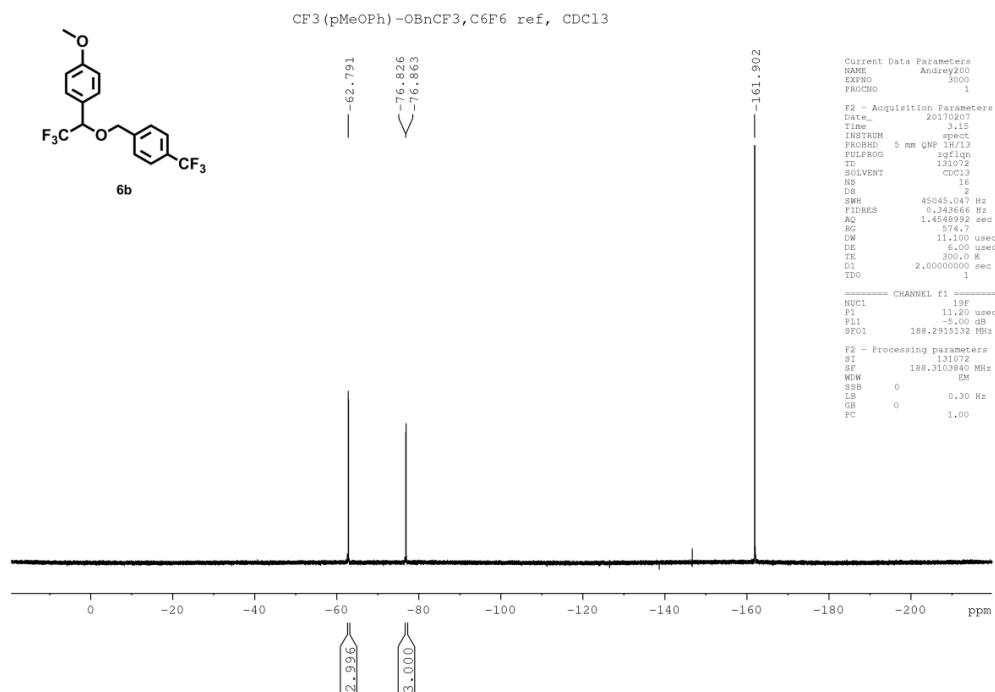

Supplementary figure 50.  $^{19}\text{F}$  NMR spectra of **6b** in  $\text{CDCl}_3$

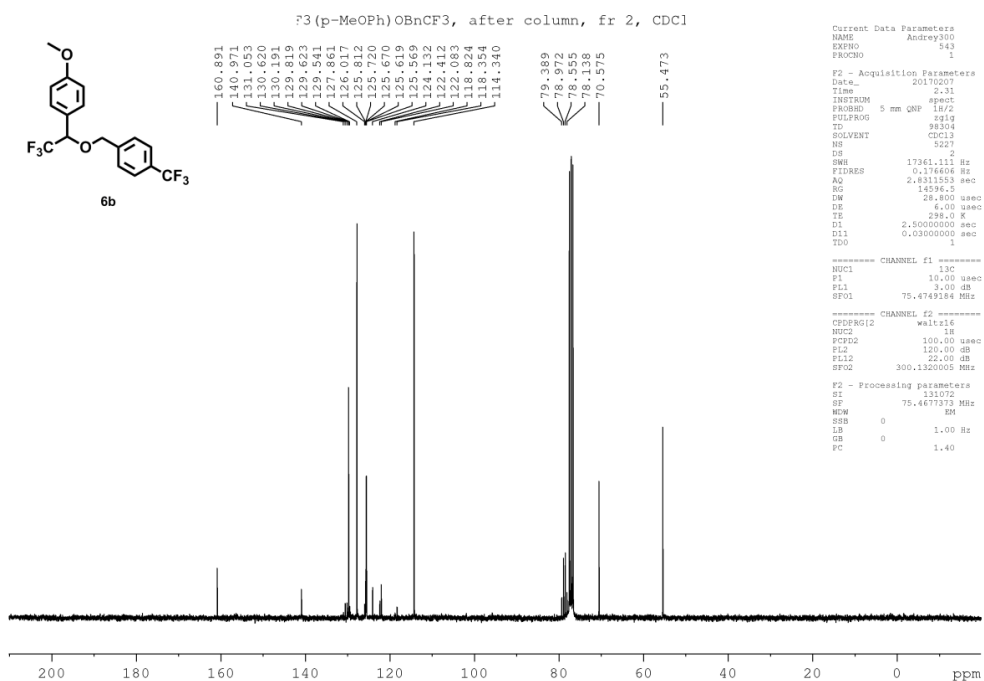

Supplementary figure 51. <sup>13</sup>C NMR spectra of **6b** in CDCl<sub>3</sub>

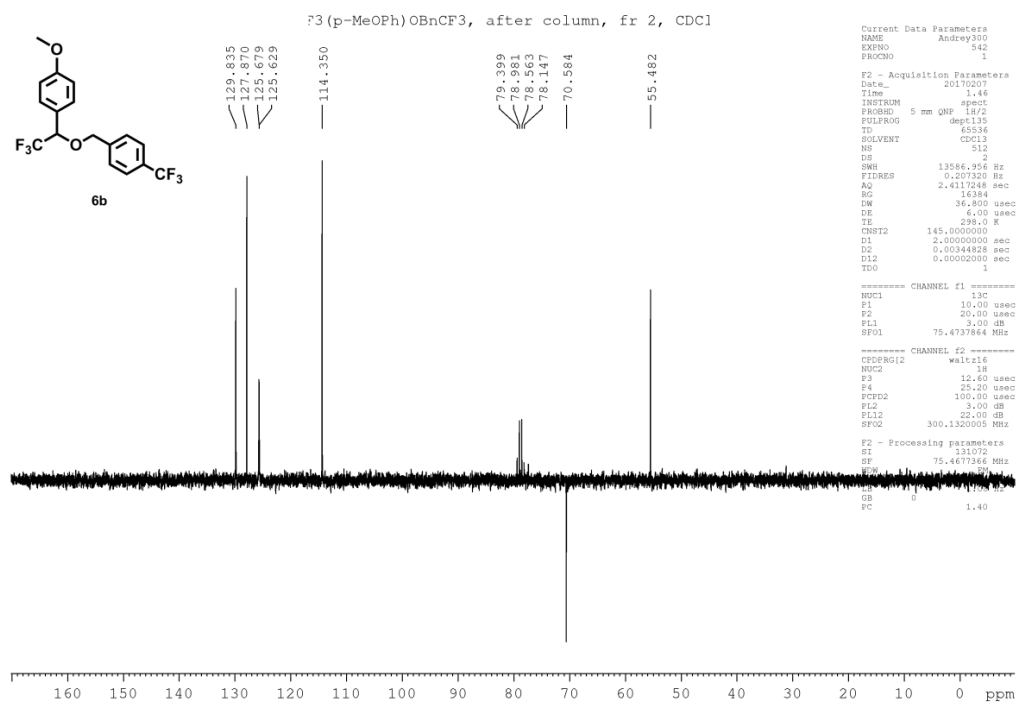

Supplementary figure 52. DEPT-135 NMR spectra of **6b** in CDCl<sub>3</sub>

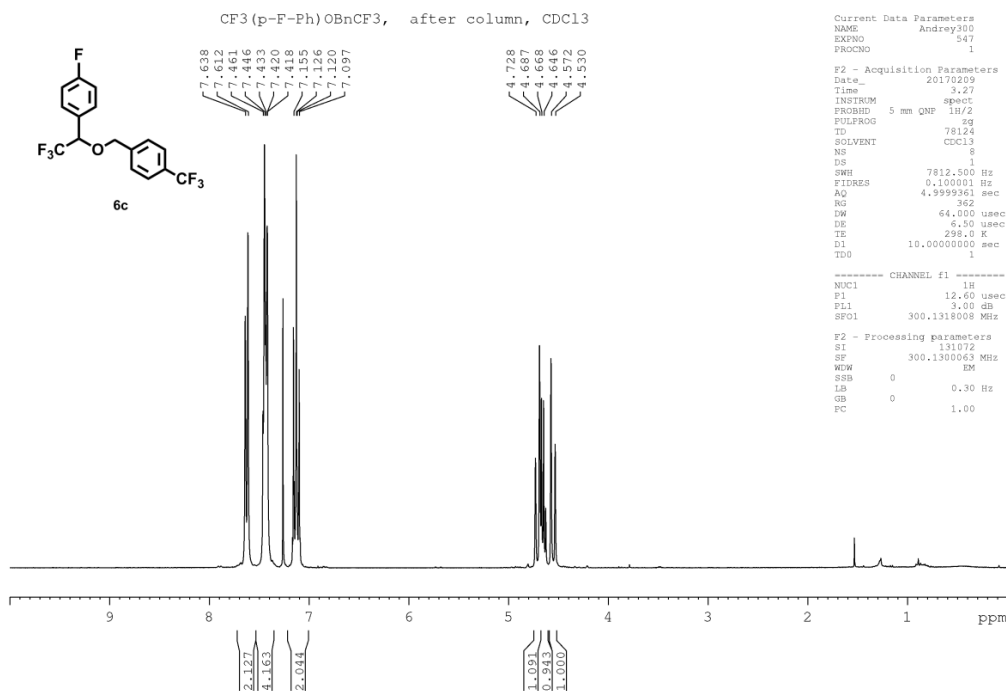

Supplementary figure 53. <sup>1</sup>H NMR spectra of **6c** in CDCl<sub>3</sub>

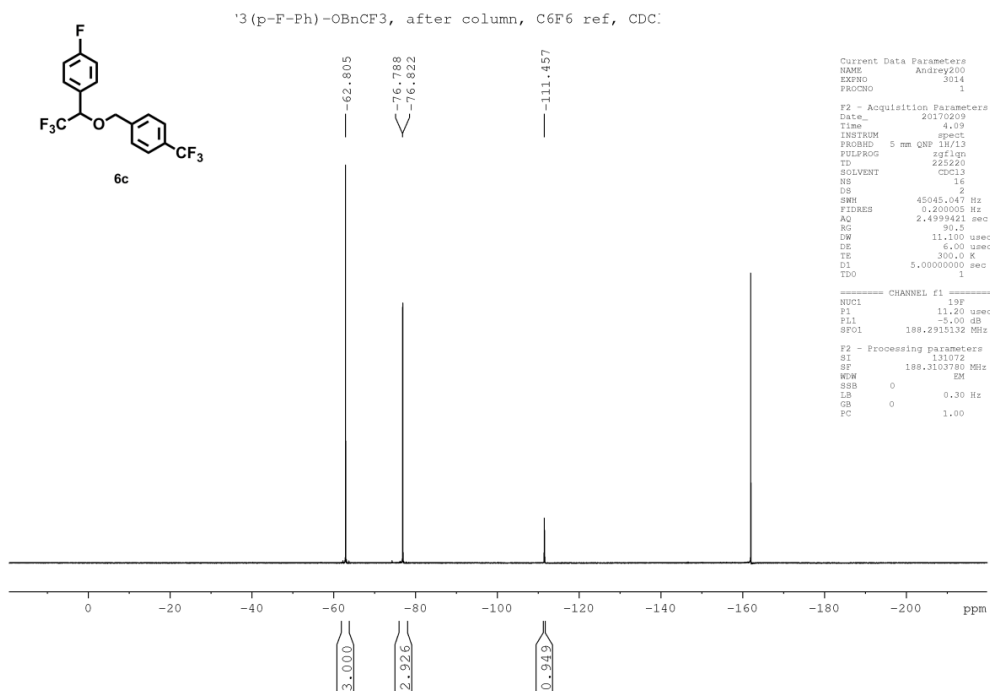

Supplementary figure 54. <sup>19</sup>F NMR spectra of **6c** in CDCl<sub>3</sub>

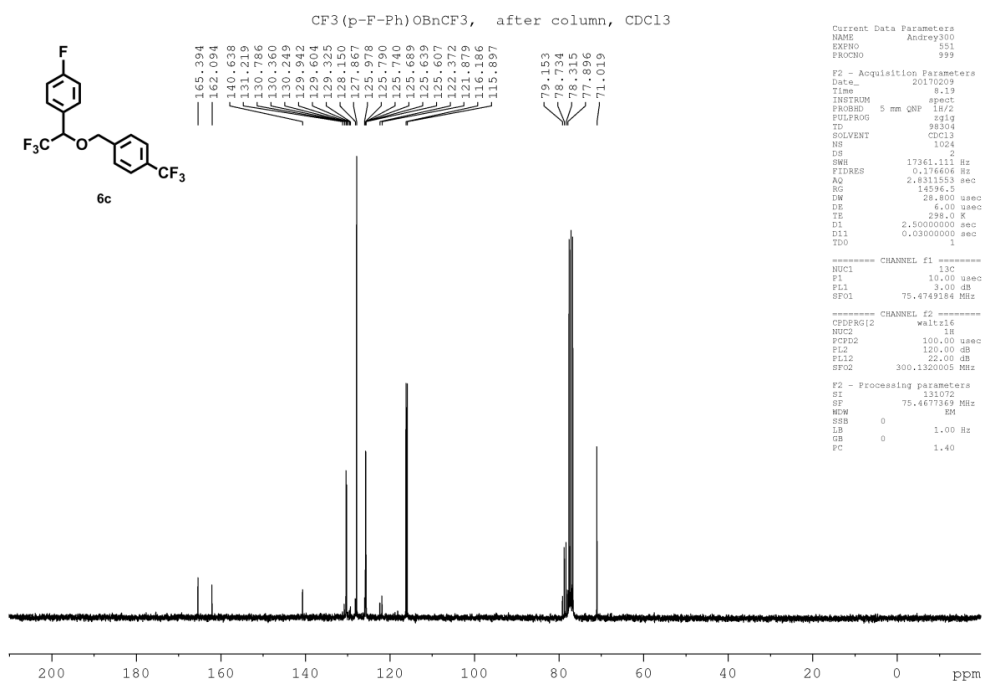

Supplementary figure 55. <sup>13</sup>C NMR spectra of **6c** in CDCl<sub>3</sub>

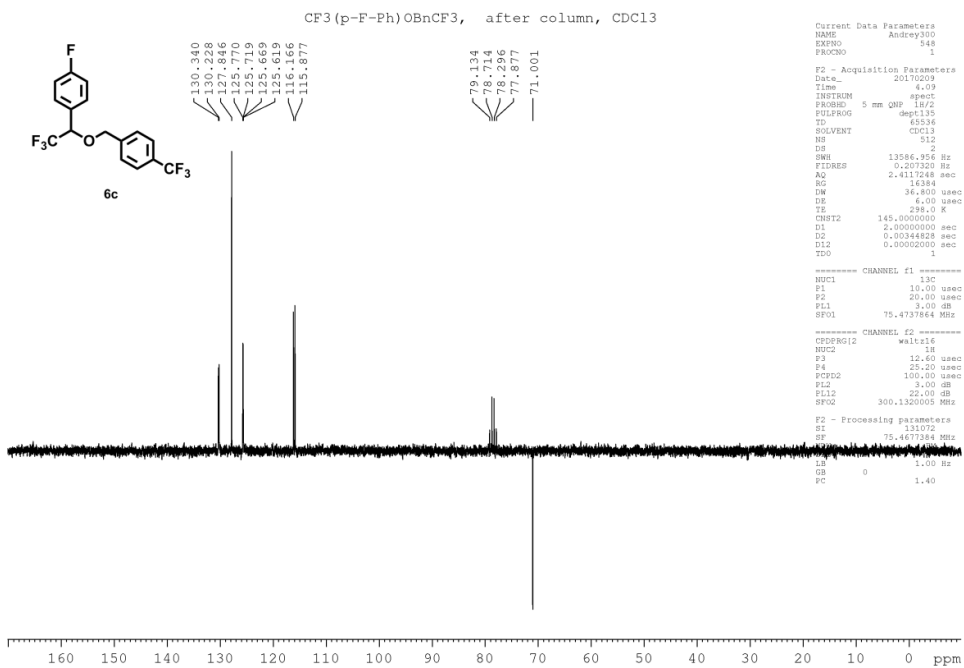

Supplementary figure 56. DEPT-135 NMR spectra of **6c** in CDCl<sub>3</sub>



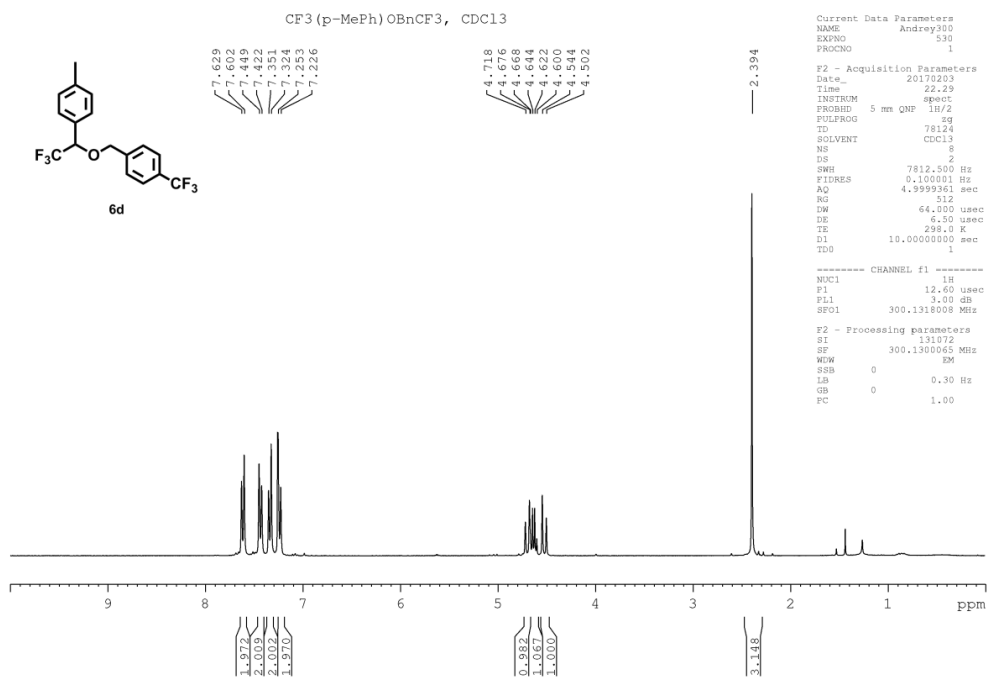

Supplementary figure 57. <sup>1</sup>H NMR spectra of **6d** in CDCl<sub>3</sub>

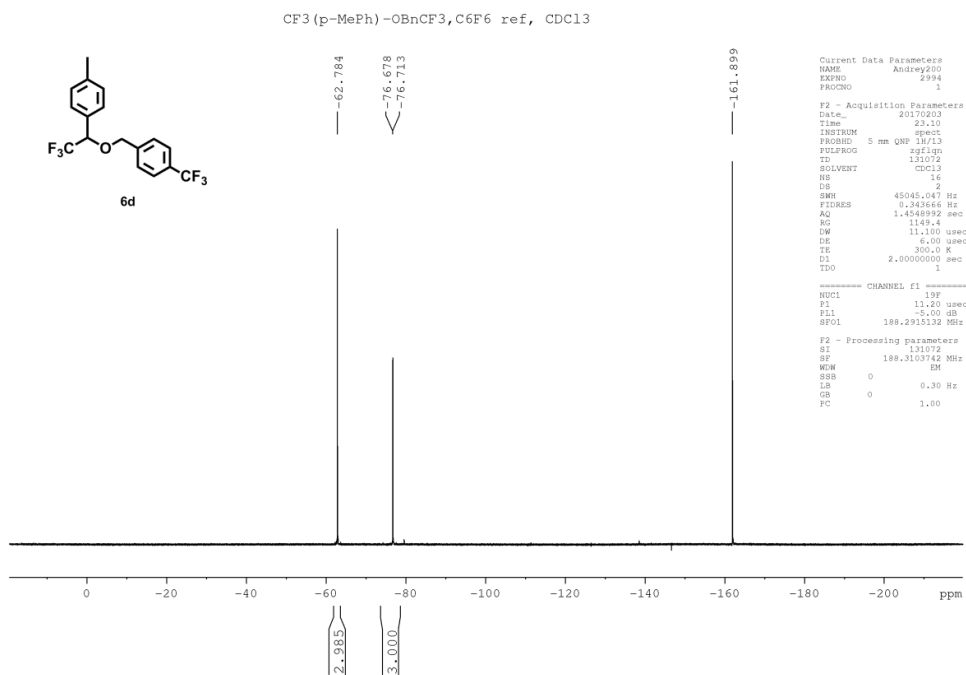

Supplementary figure 58. <sup>19</sup>F NMR spectra of **6d** in CDCl<sub>3</sub>

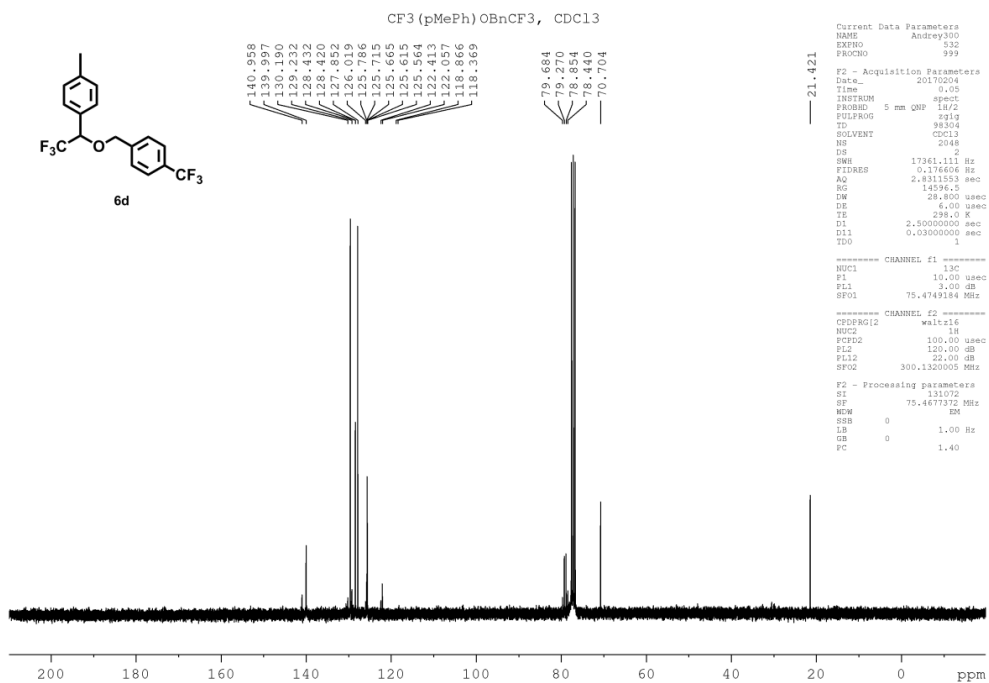

Supplementary figure 59. <sup>13</sup>C NMR spectra of **6d** in CDCl<sub>3</sub>

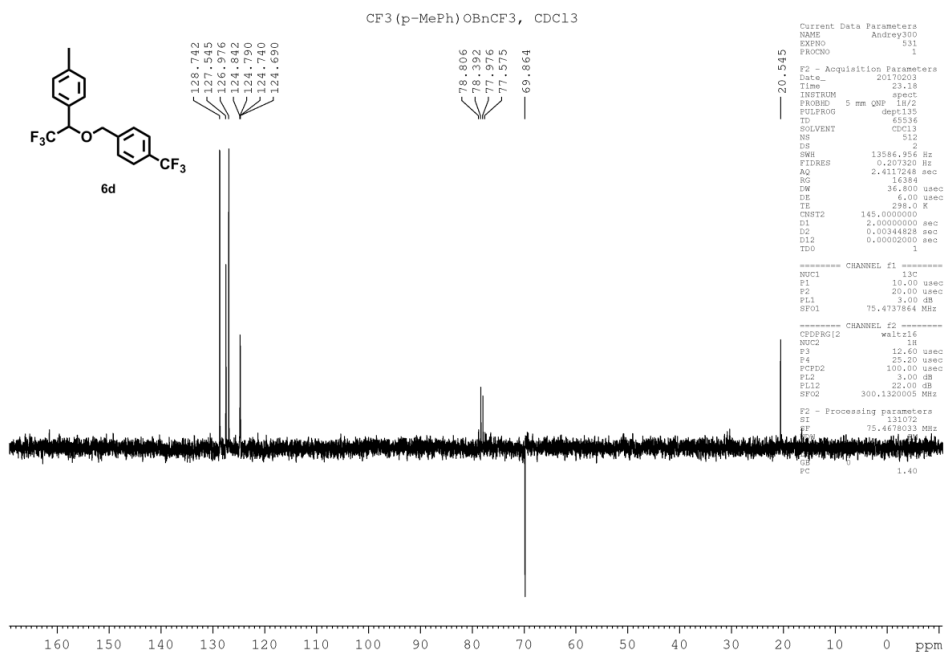

Supplementary figure 60. DEPT-135 NMR spectra of **6d** in CDCl<sub>3</sub>

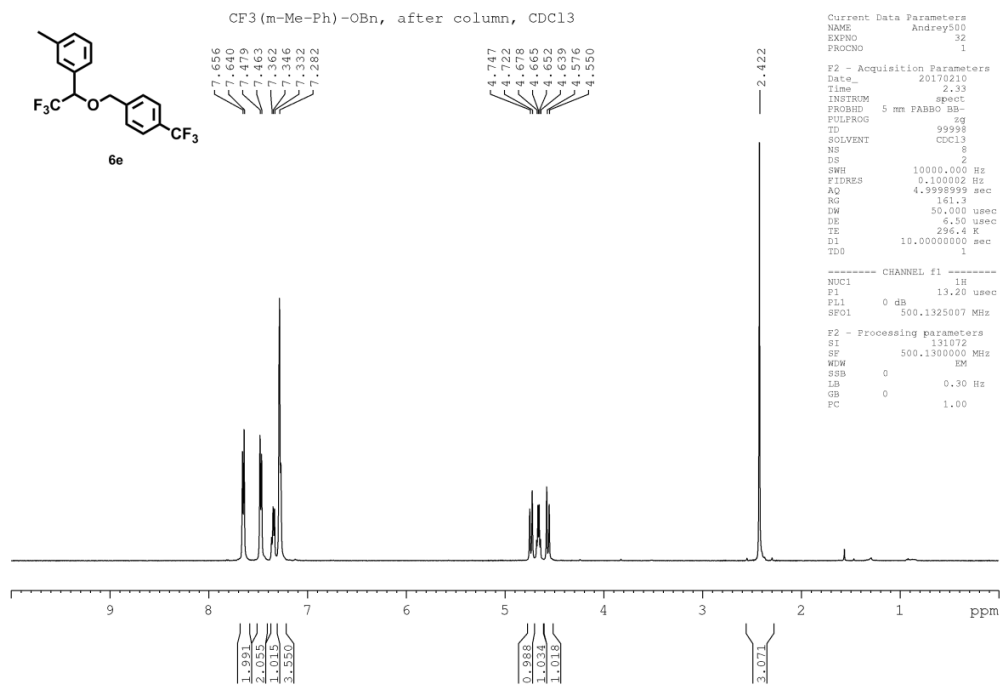

Supplementary figure 61.  $^1\text{H}$  NMR spectra of **6e** in  $\text{CDCl}_3$

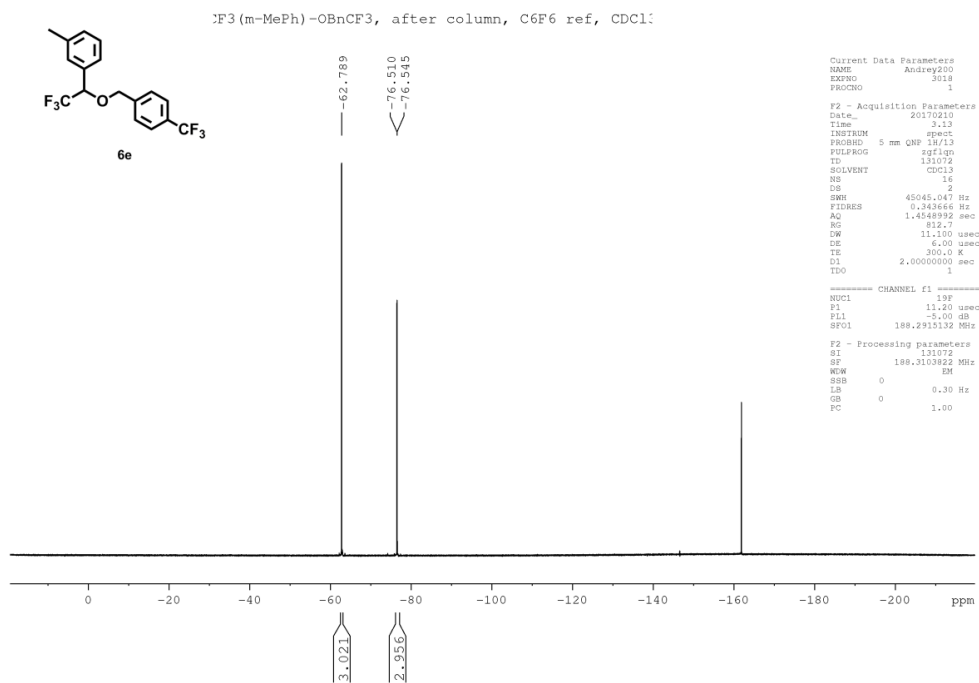

Supplementary figure 62.  $^{19}\text{F}$  NMR spectra of **6e** in  $\text{CDCl}_3$

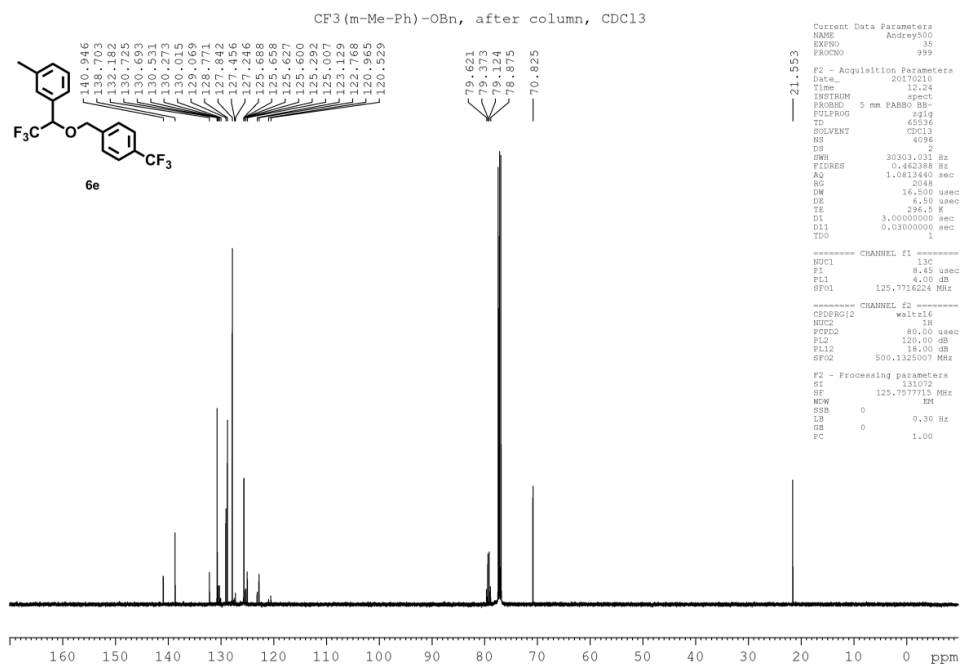

Supplementary figure 63. <sup>13</sup>C NMR spectra of **6e** in CDCl<sub>3</sub>

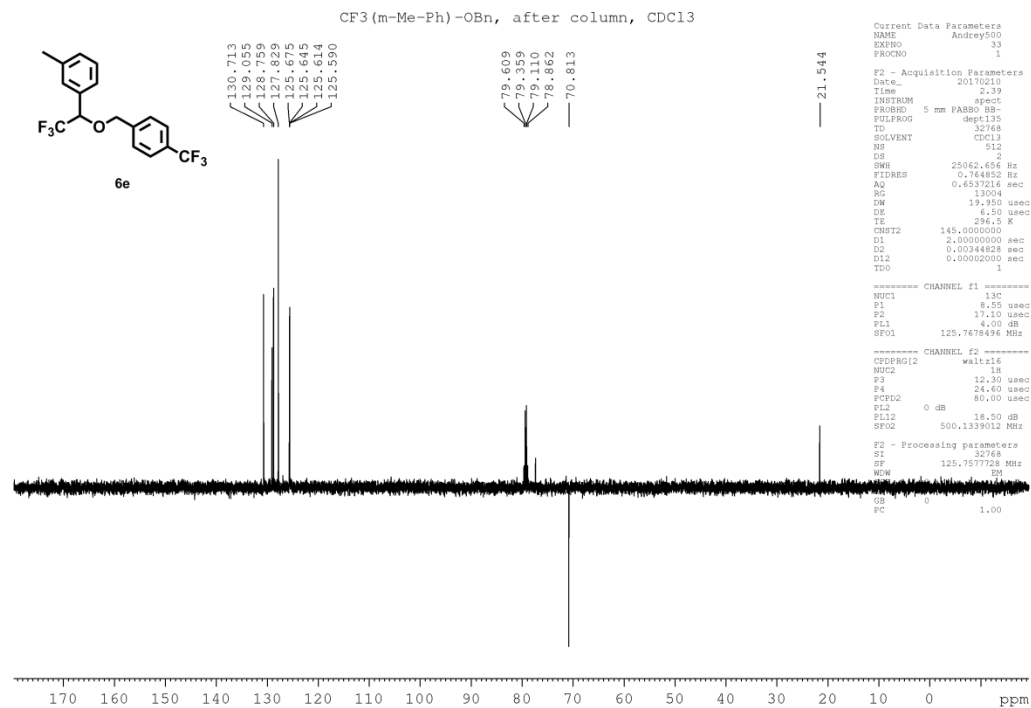

Supplementary figure 64. DEPT-135 NMR spectra of **6e** in CDCl<sub>3</sub>

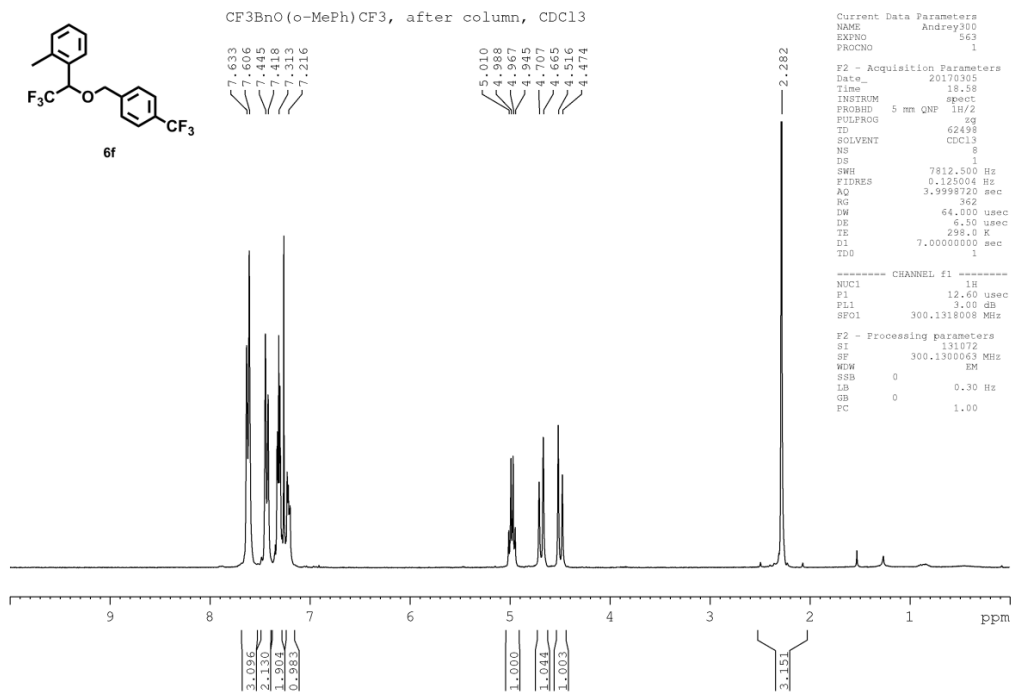

Supplementary figure 65. <sup>1</sup>H NMR spectra of **6f** in CDCl<sub>3</sub>

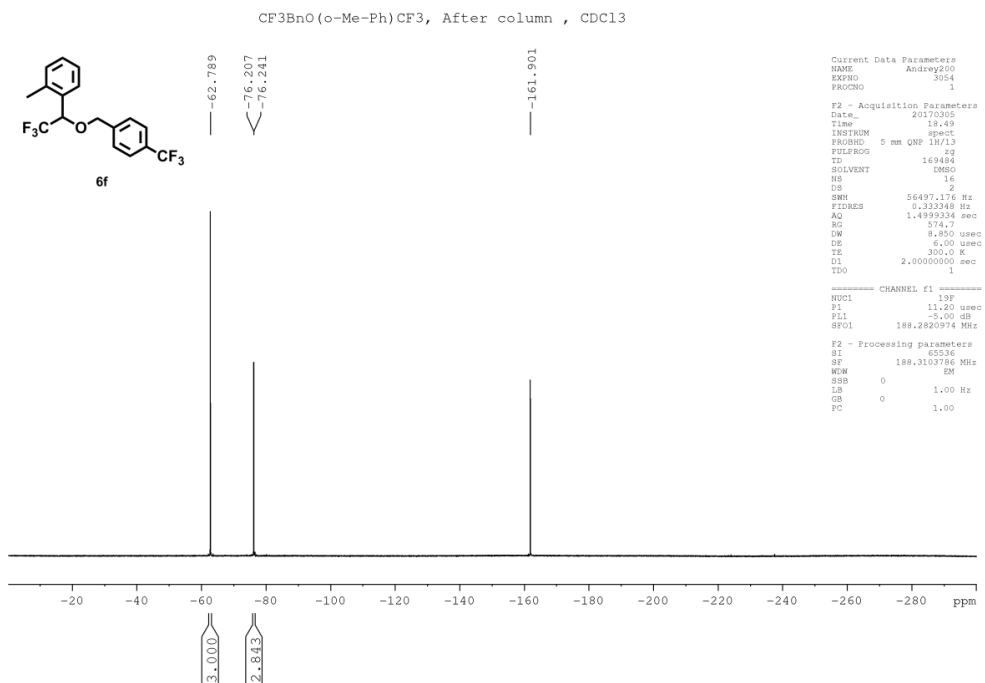

Supplementary figure 66. <sup>19</sup>F NMR spectra of **6f** in CDCl<sub>3</sub>

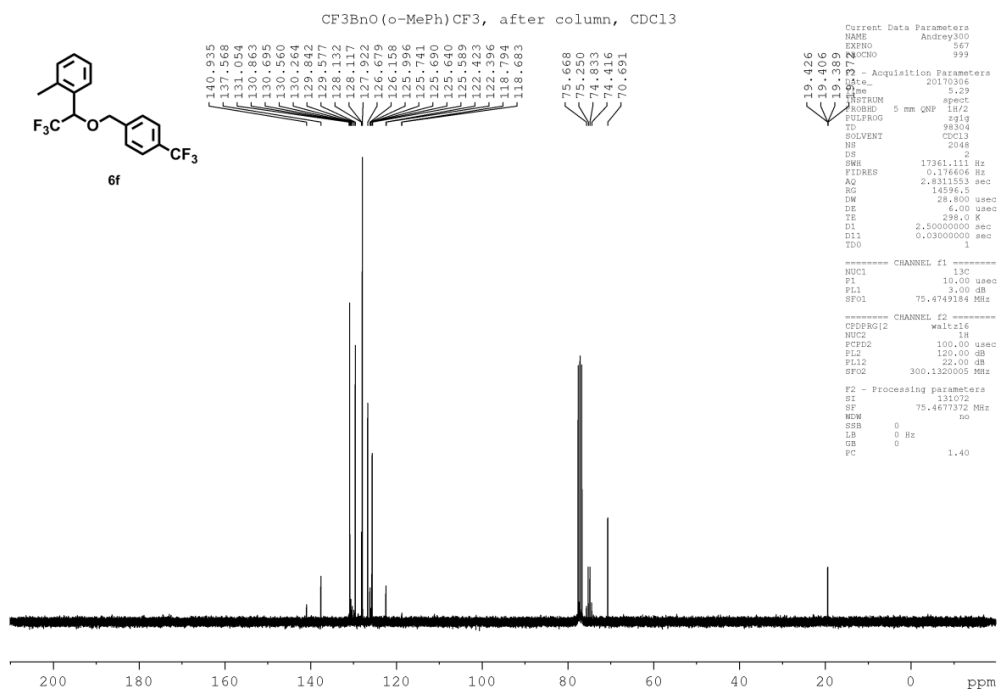

Supplementary figure 67. <sup>13</sup>C NMR spectra of **6f** in CDCl<sub>3</sub>

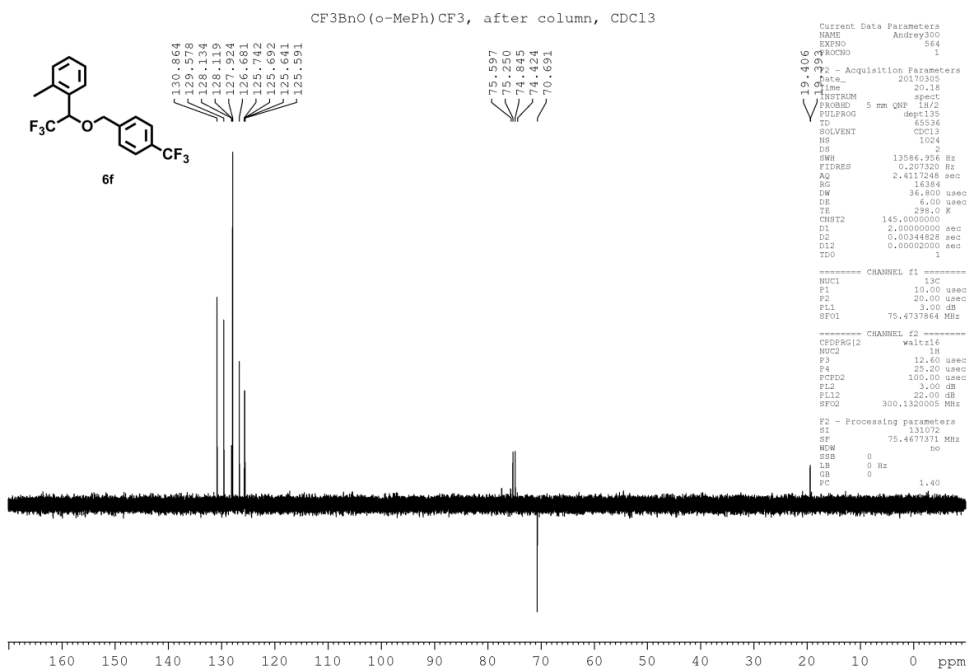

Supplementary figure 68. DEPT-135 NMR spectra of **6f** in CDCl<sub>3</sub>

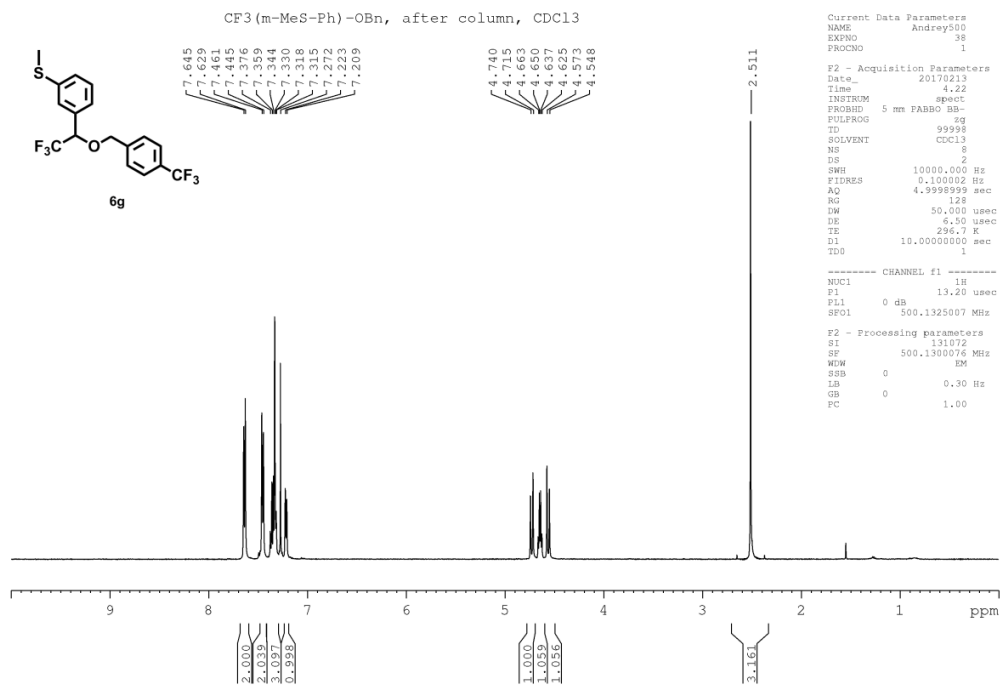

Supplementary figure 69. <sup>1</sup>H NMR spectra of **6g** in CDCl<sub>3</sub>

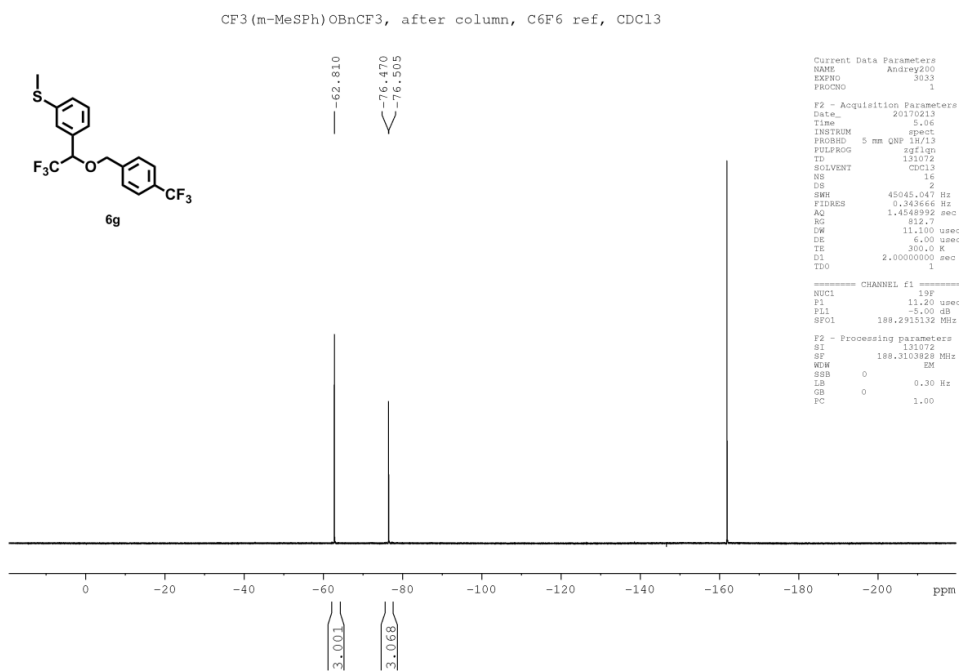

Supplementary figure 70. <sup>19</sup>F NMR spectra of **6g** in CDCl<sub>3</sub>

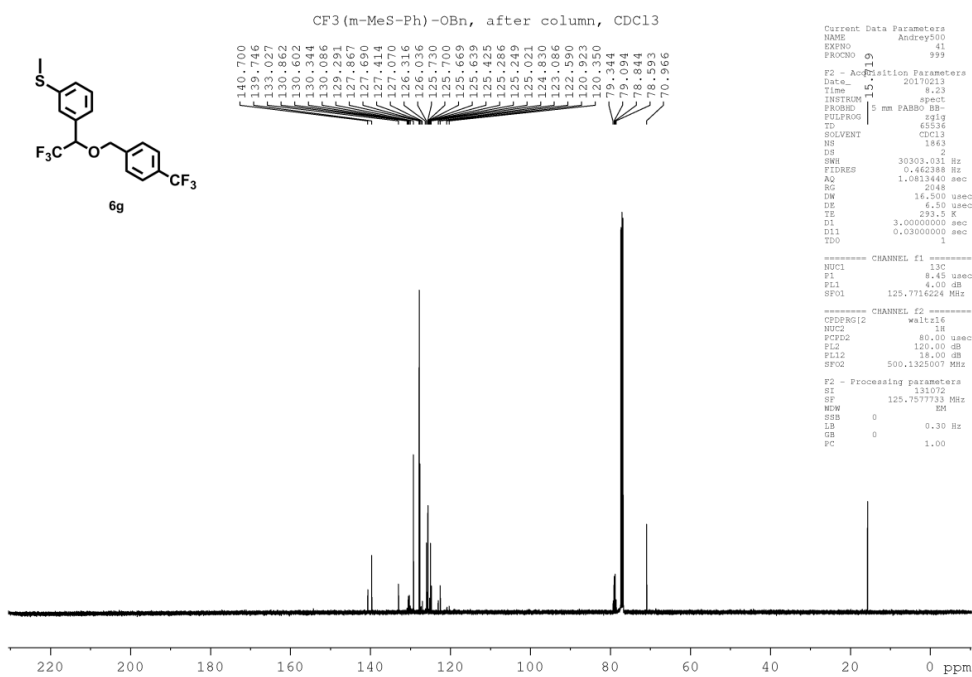

Supplementary figure 71. <sup>13</sup>C NMR spectra of **6g** in CDCl<sub>3</sub>

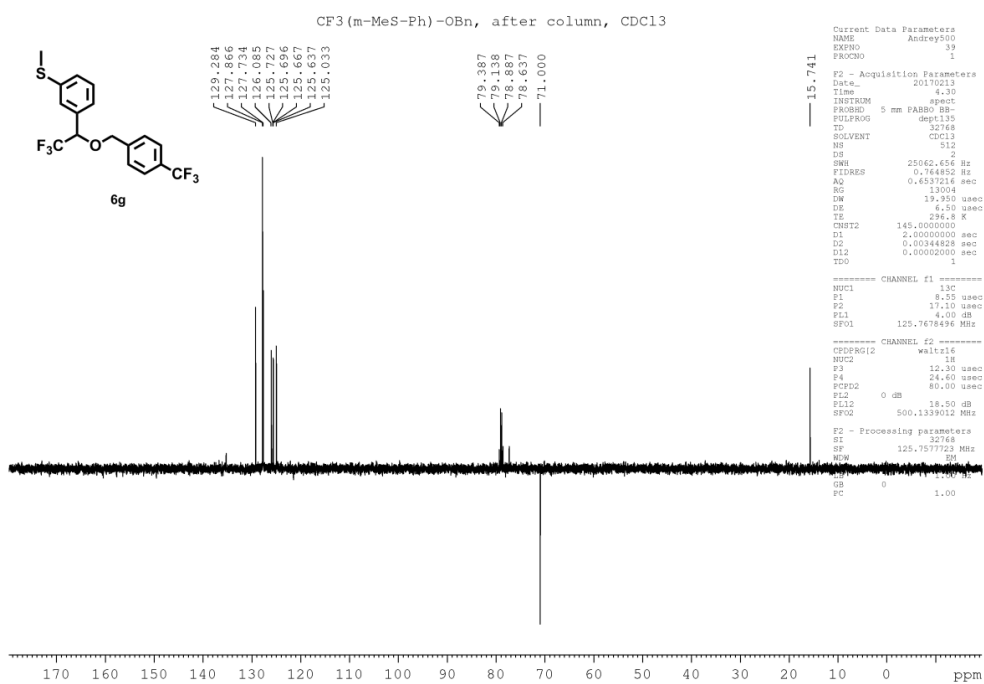

Supplementary figure 72. DEPT-135 NMR spectra of **6g** in CDCl<sub>3</sub>



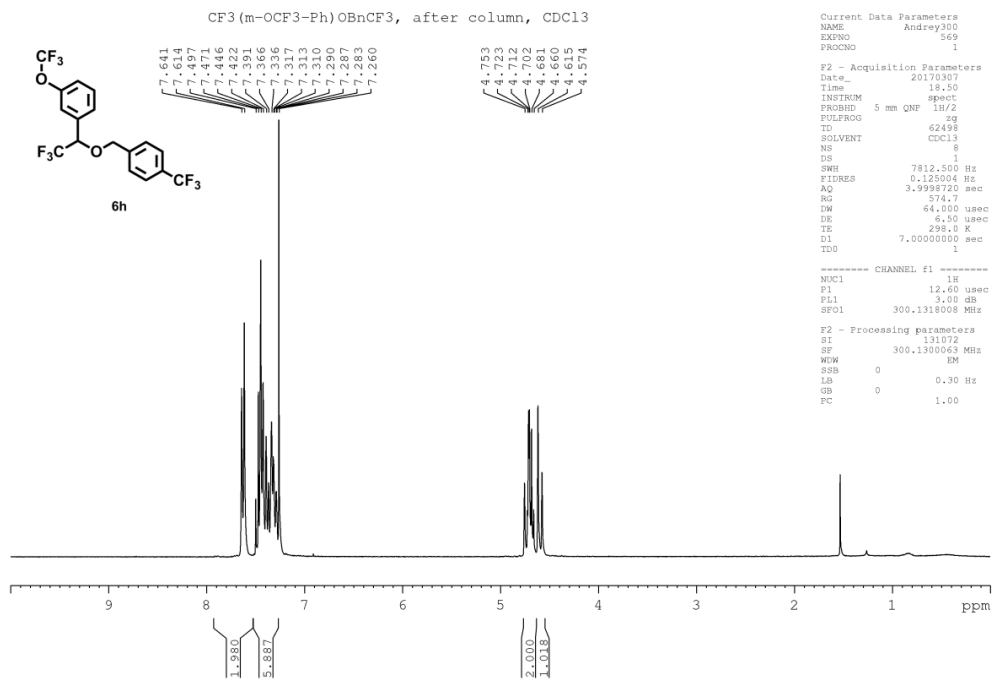

Supplementary figure 73.  $^1\text{H}$  NMR spectra of **6h** in  $\text{CDCl}_3$

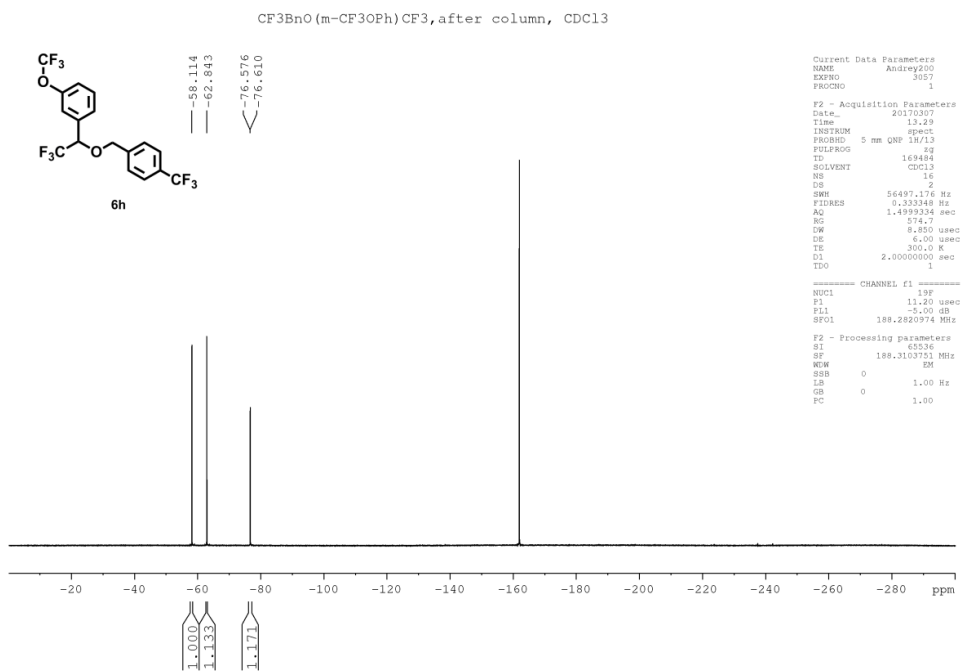

Supplementary figure 74.  $^{19}\text{F}$  NMR spectra of **6h** in  $\text{CDCl}_3$



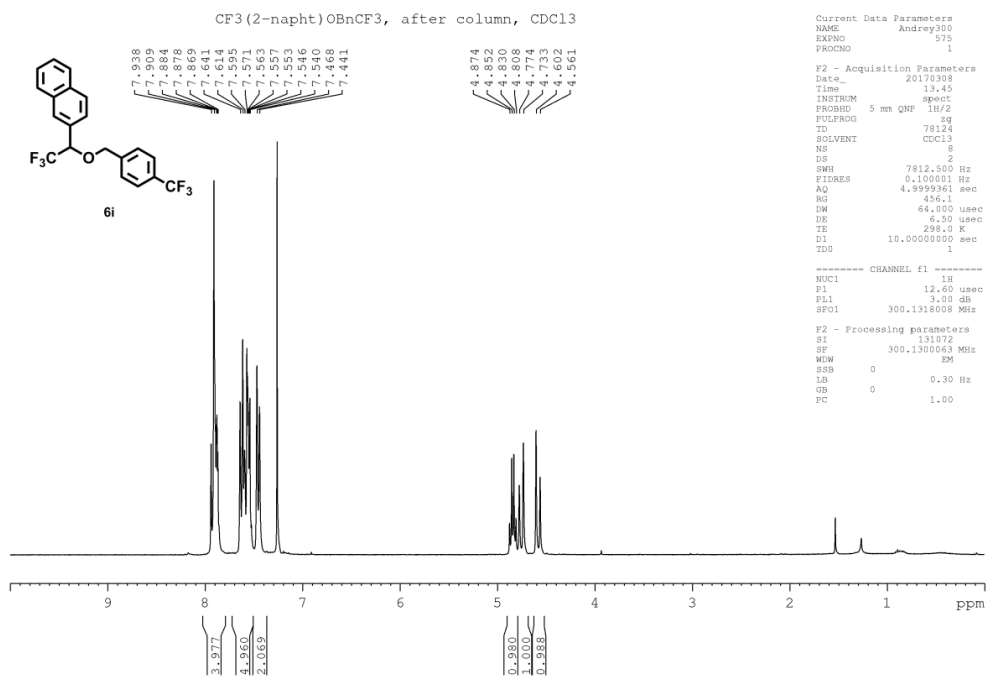

Supplementary figure 77.  $^1\text{H}$  NMR spectra of **6i** in  $\text{CDCl}_3$

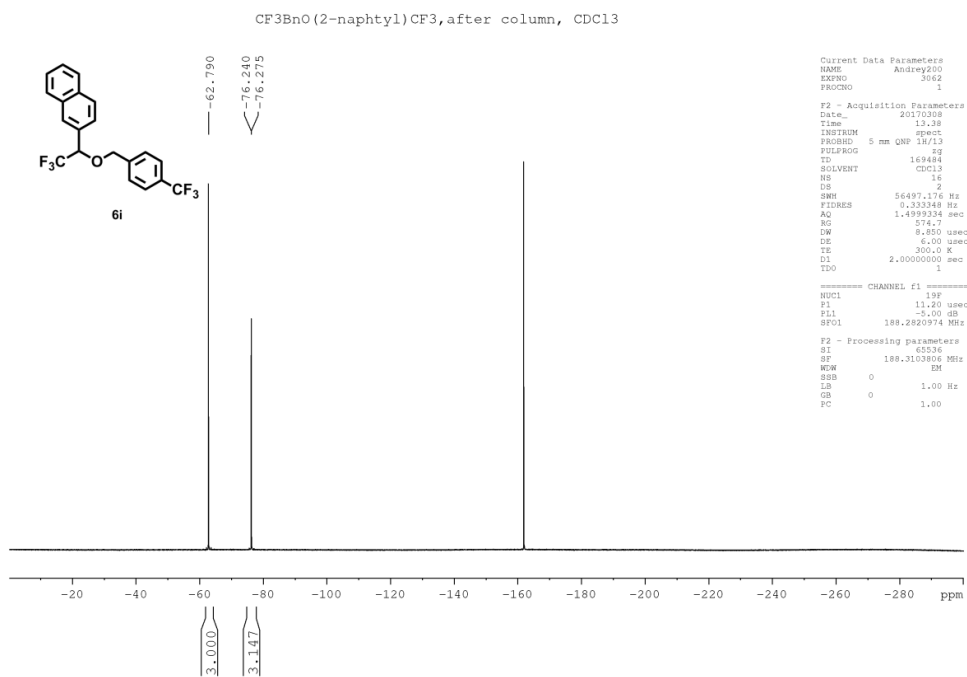

Supplementary figure 78.  $^{19}\text{F}$  NMR spectra of **6i** in  $\text{CDCl}_3$

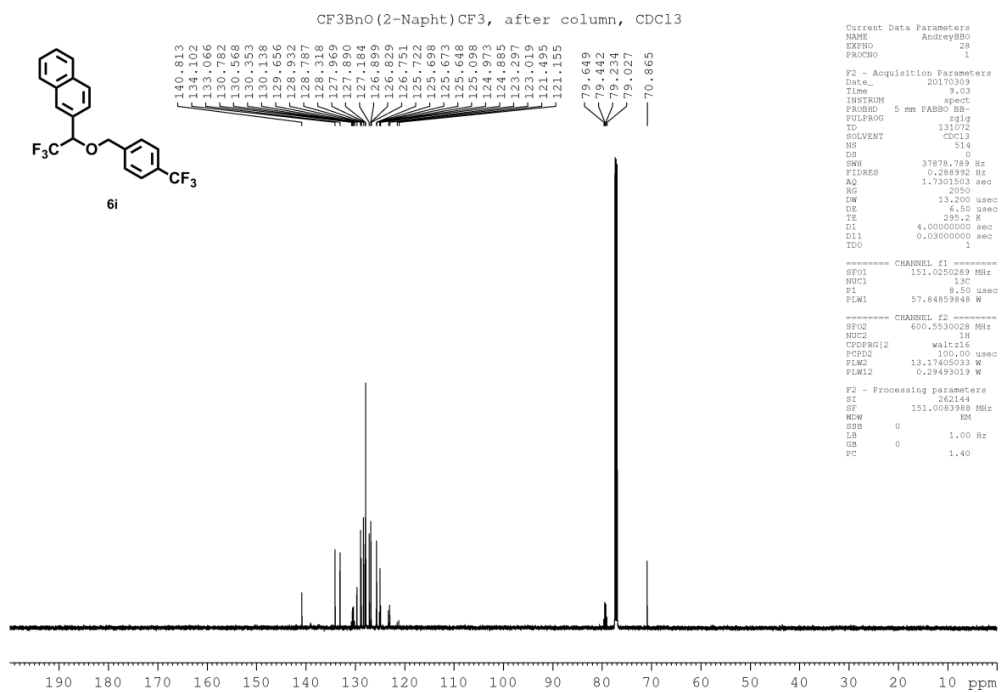

Supplementary figure 79. <sup>13</sup>C NMR spectra of **6i** in CDCl<sub>3</sub>

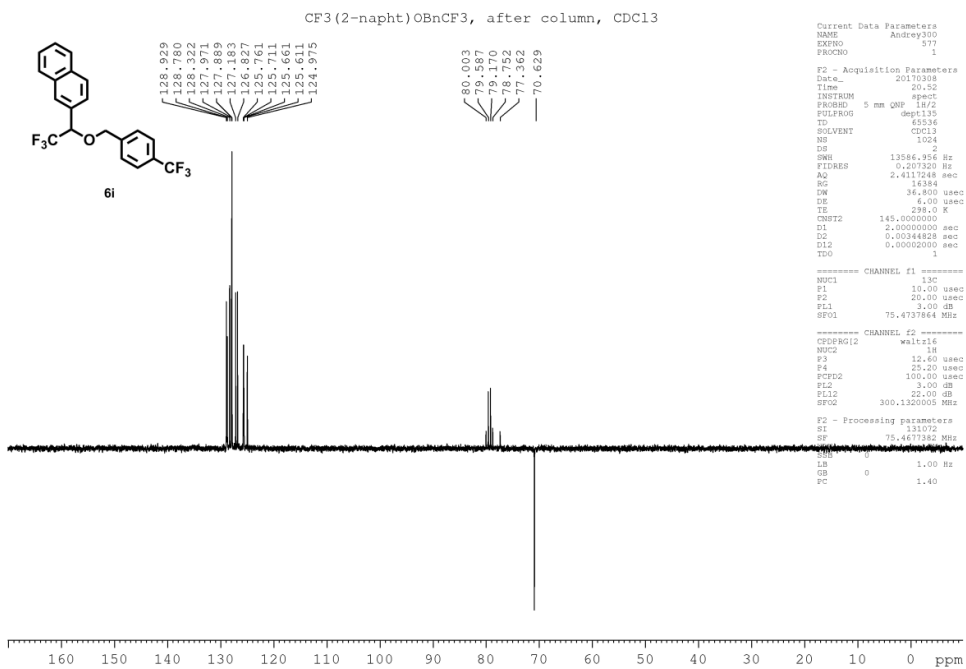

Supplementary figure 80. DEPT-135 NMR spectra of **6i** in CDCl<sub>3</sub>

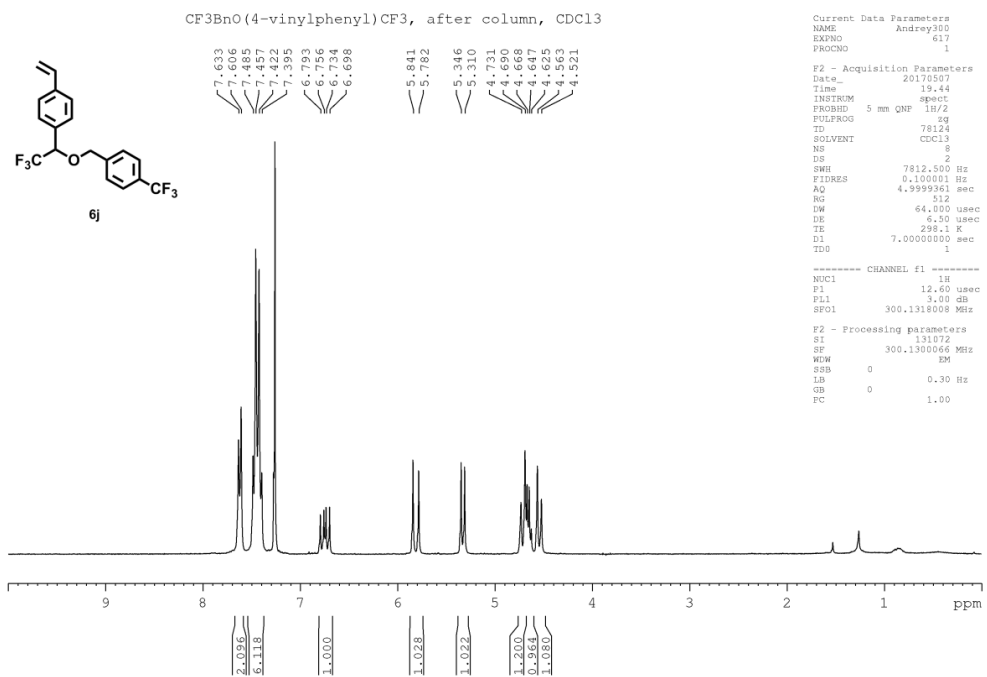

Supplementary figure 81.  $^1\text{H}$  NMR spectra of **6j** in  $\text{CDCl}_3$

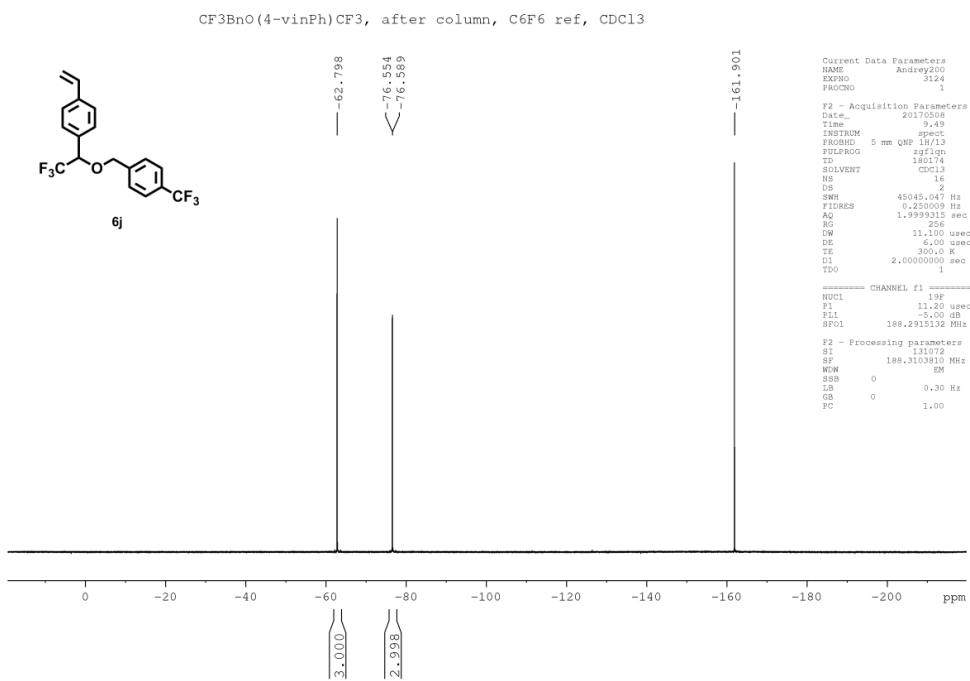

Supplementary figure 82.  $^{19}\text{F}$  NMR spectra of **6j** in  $\text{CDCl}_3$

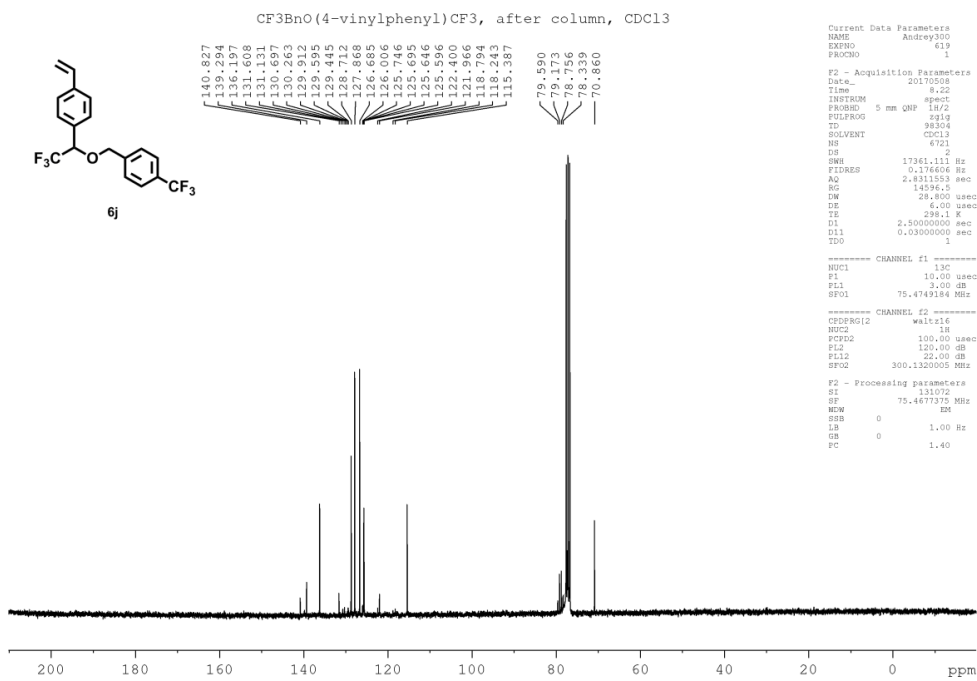

Supplementary figure 83. <sup>13</sup>C NMR spectra of **6j** in CDCl<sub>3</sub>

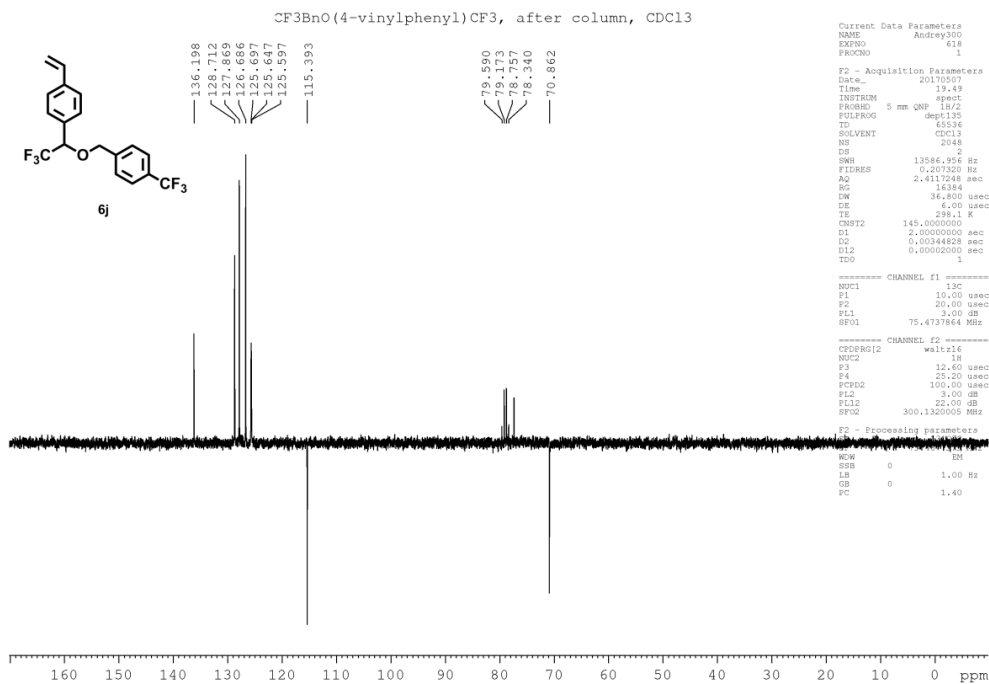

Supplementary figure 84. DEPT-135 NMR spectra of **6j** in CDCl<sub>3</sub>

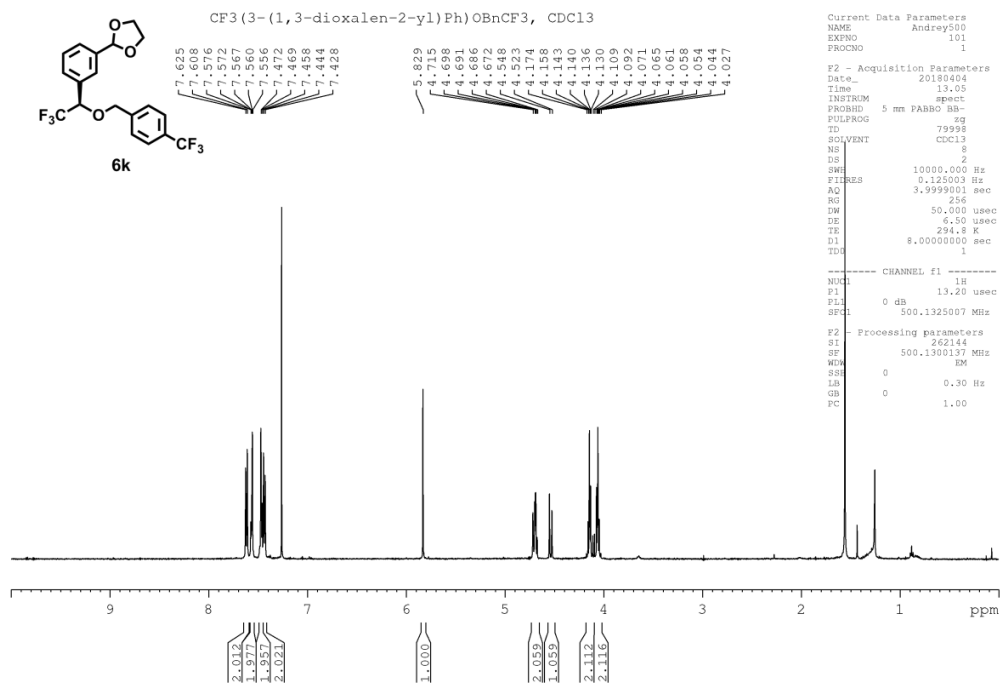

Supplementary figure 85. <sup>1</sup>H NMR spectra of **6k** in CDCl<sub>3</sub>

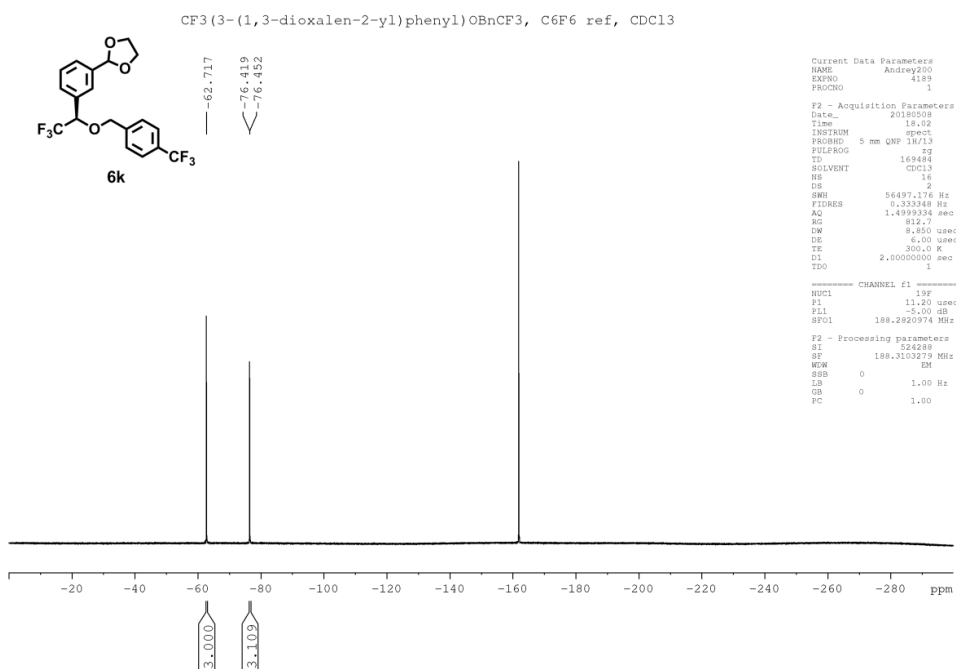

Supplementary figure 86. <sup>19</sup>F NMR spectra of **6k** in CDCl<sub>3</sub>

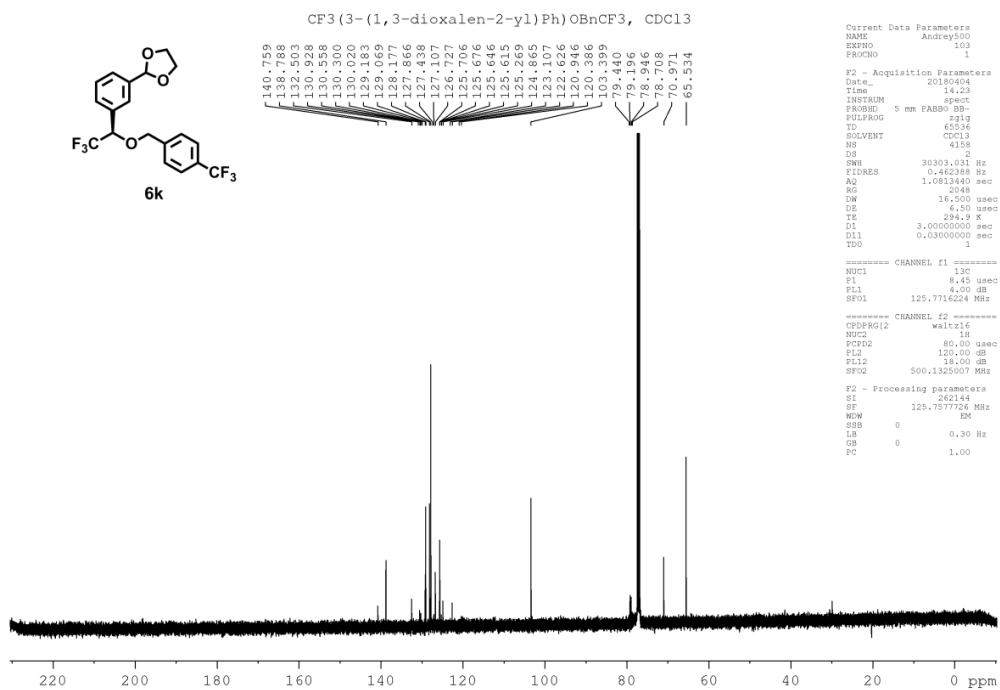

Supplementary figure 87. <sup>13</sup>C NMR spectra of 6k in CDCl<sub>3</sub>

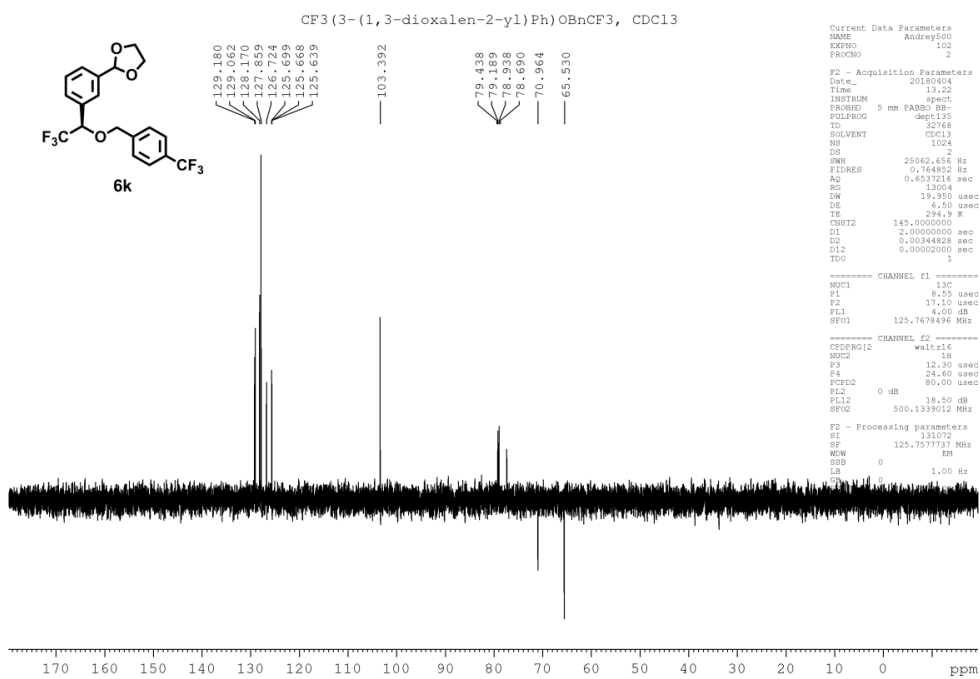

Supplementary figure 88. DPET-135 NMR spectra of 6k in CDCl<sub>3</sub>



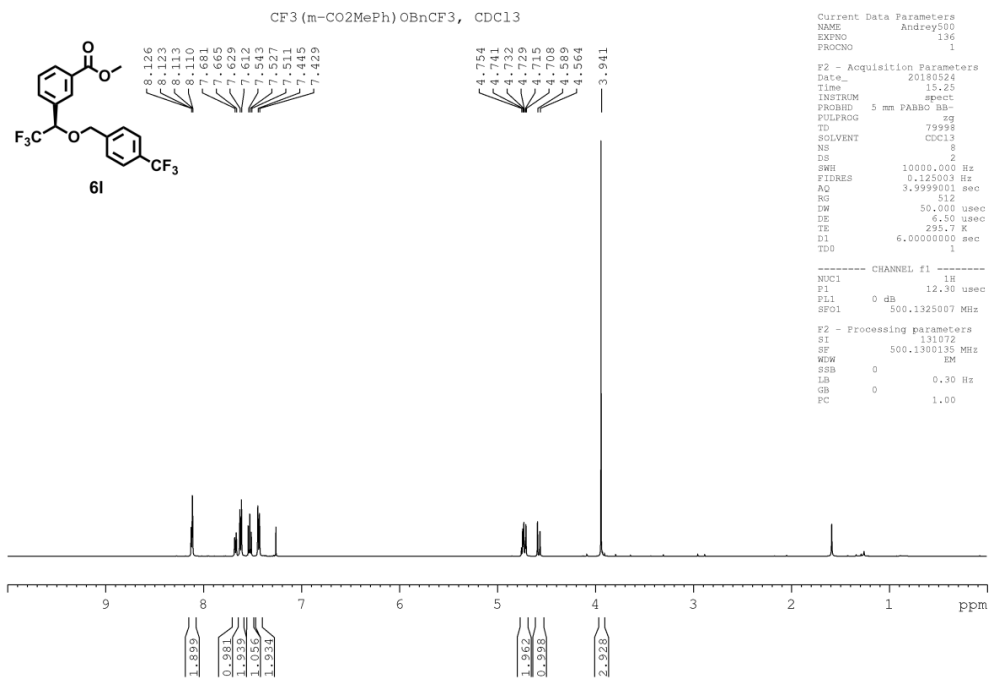

Supplementary figure 89.  $^1\text{H}$  NMR spectra of **6I** in  $\text{CDCl}_3$

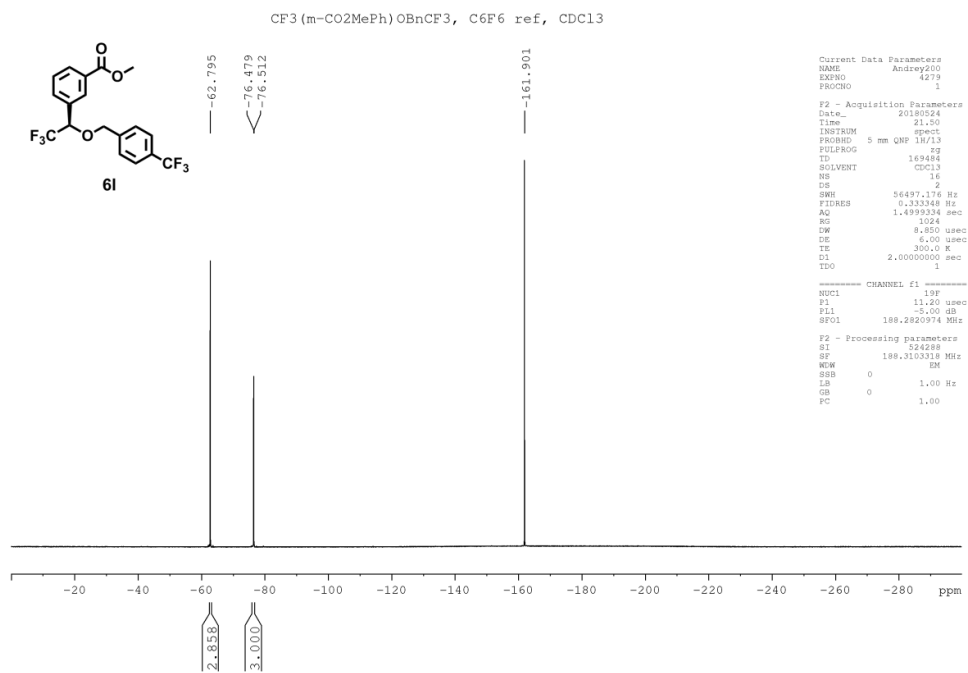

Supplementary figure 90.  $^{19}\text{F}$  NMR spectra of **6I** in  $\text{CDCl}_3$

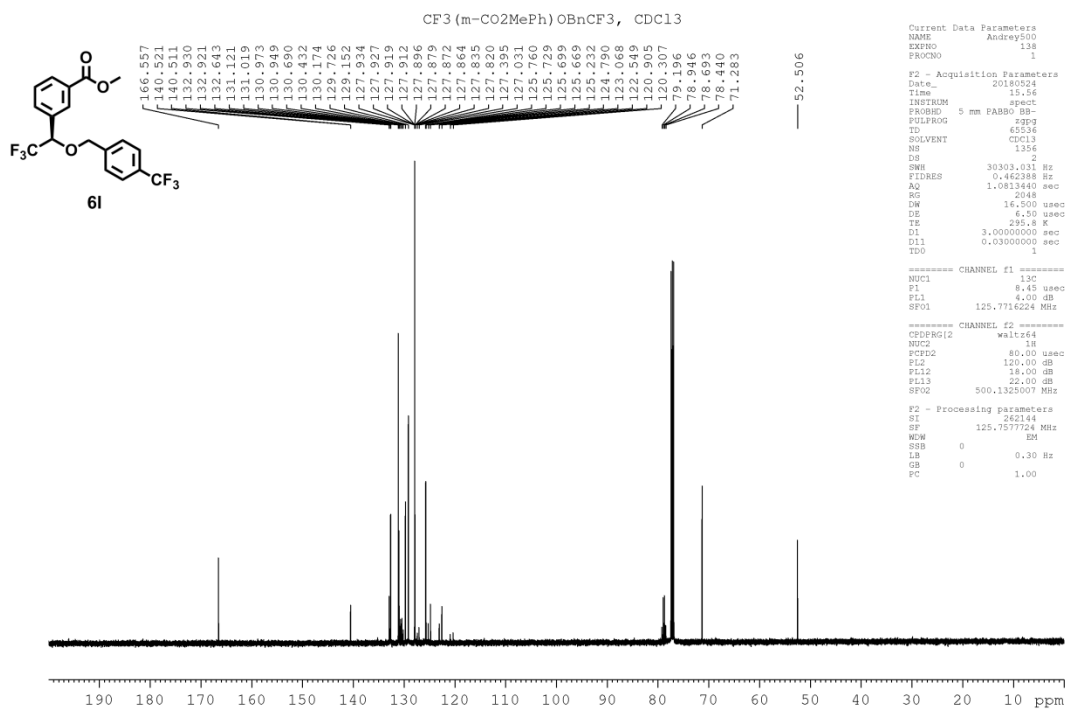

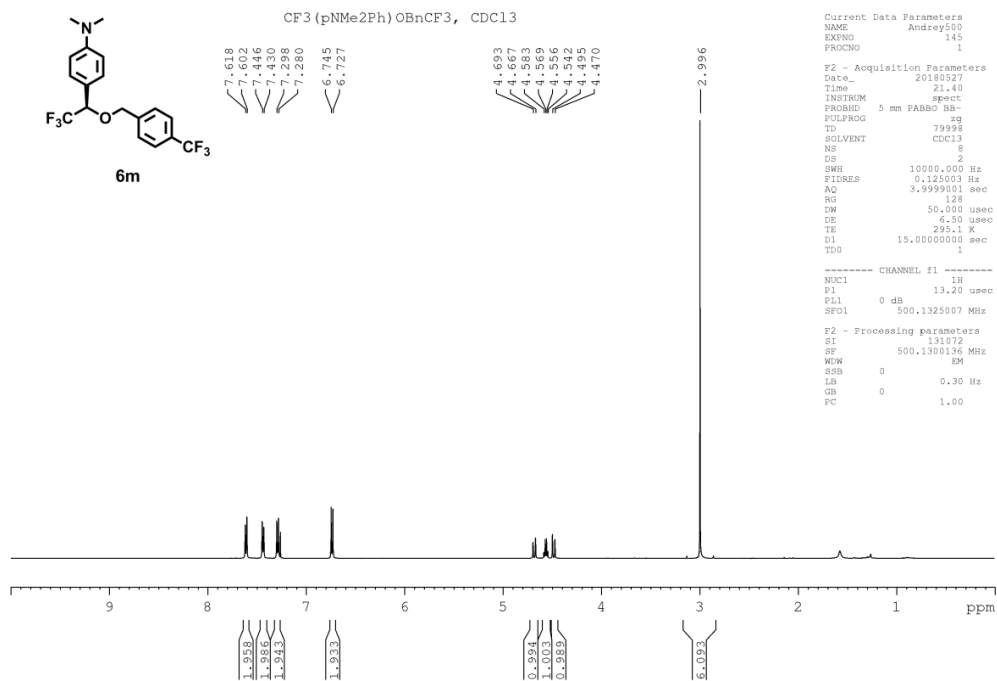

Supplementary figure 93.  $^1\text{H}$  NMR spectra of **6m** in  $\text{CDCl}_3$

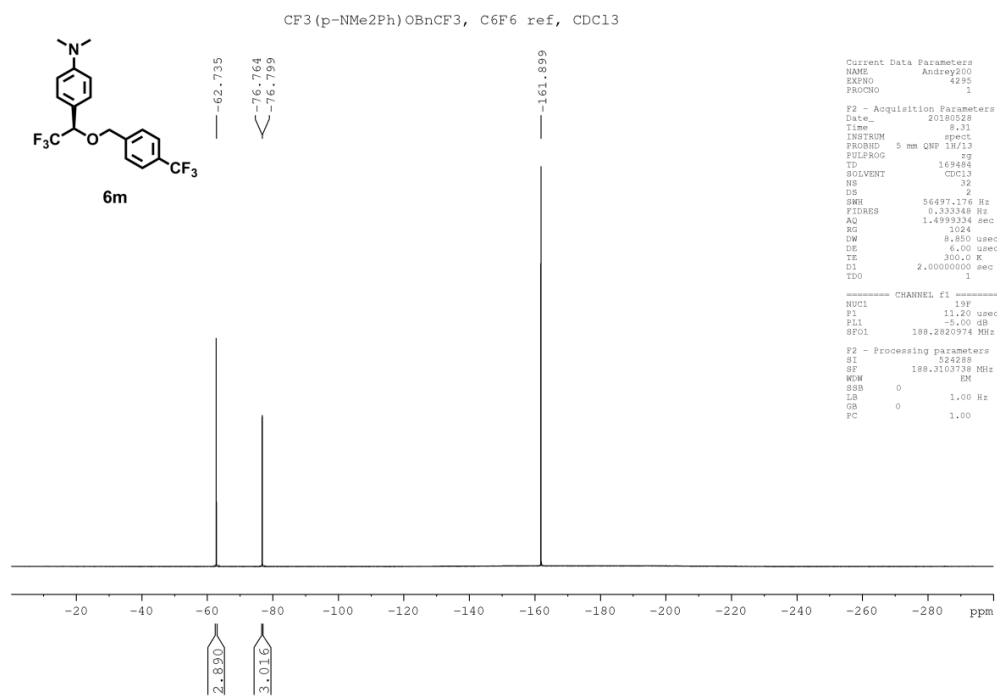

Supplementary figure 94.  $^{19}\text{F}$  NMR spectra of **6m** in  $\text{CDCl}_3$

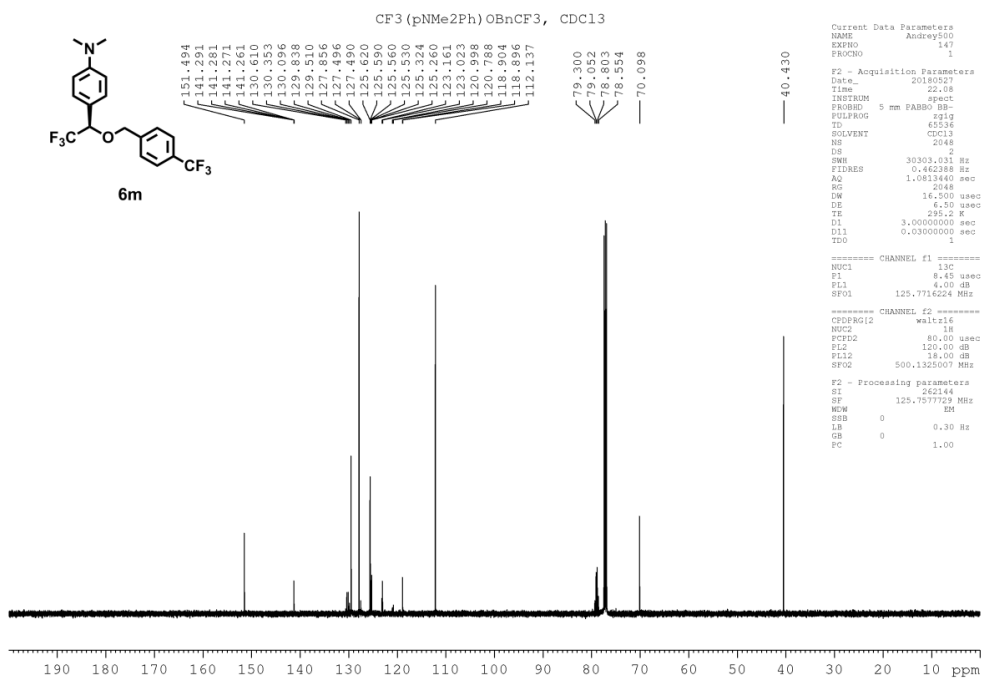

Supplementary figure 95. <sup>13</sup>C NMR spectra of 6m in CDCl<sub>3</sub>

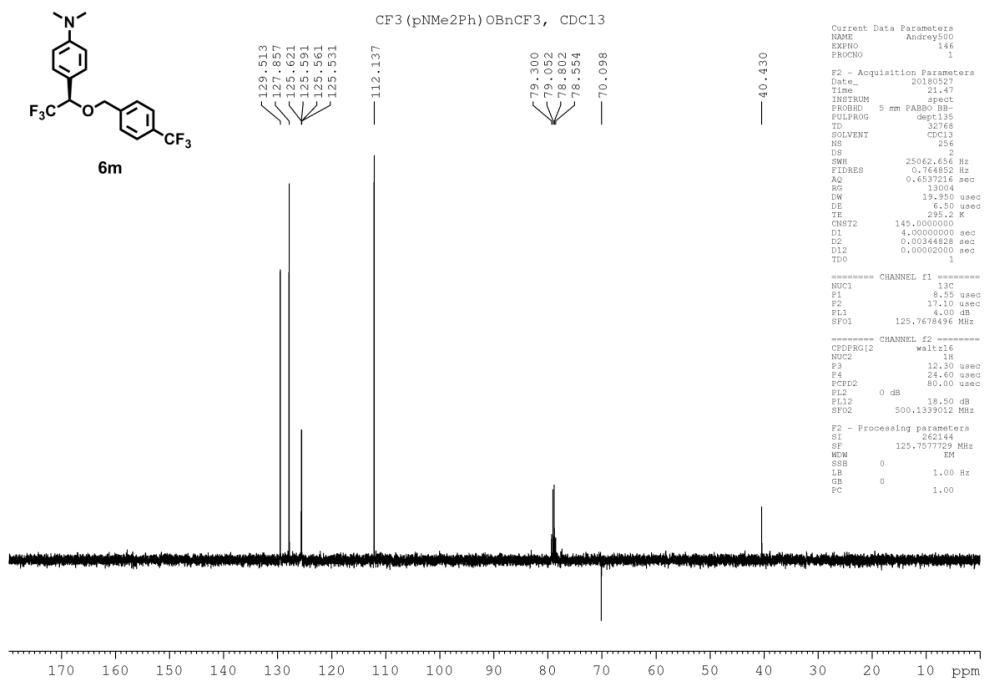

Supplementary figure 96. DEPT-135 NMR spectra of 6m in CDCl<sub>3</sub>

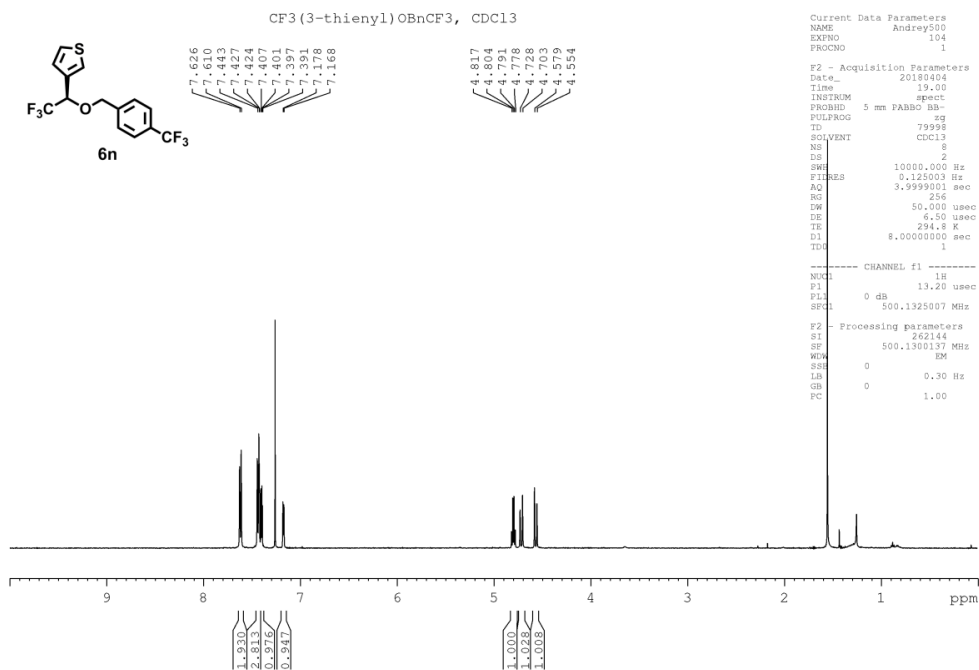

Supplementary figure 97.  $^1\text{H}$  NMR spectra of **6n** in  $\text{CDCl}_3$

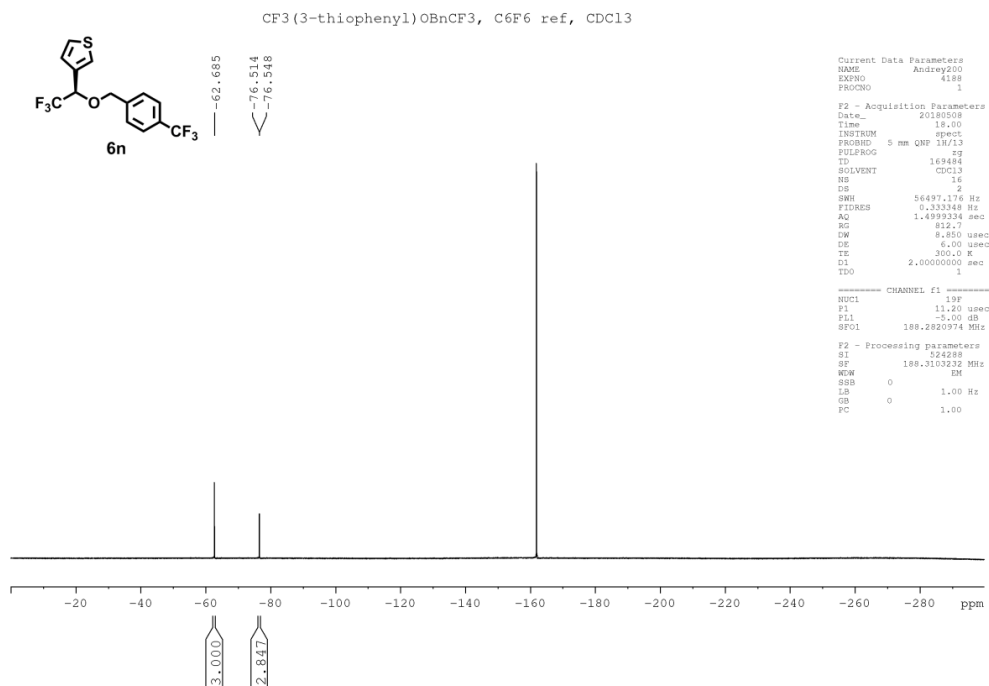

Supplementary figure 98.  $^{19}\text{F}$  NMR spectra of **6n** in  $\text{CDCl}_3$

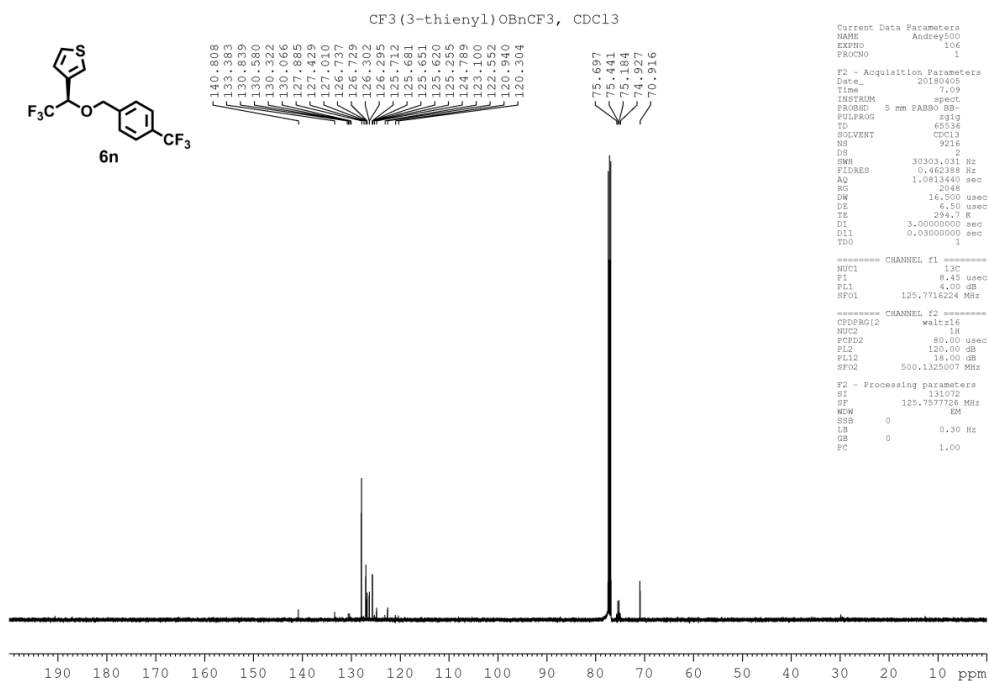

Supplementary figure 99. <sup>13</sup>C NMR spectra of **6n** in CDCl<sub>3</sub>

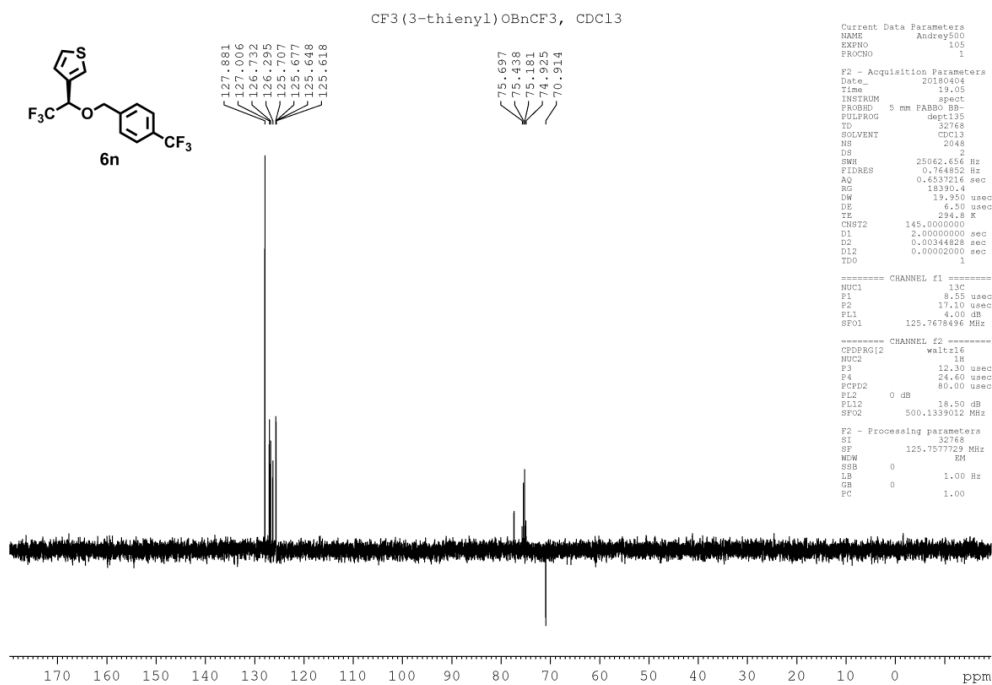

Supplementary figure 100. <sup>1</sup>H NMR spectra of **6n** in CDCl<sub>3</sub>

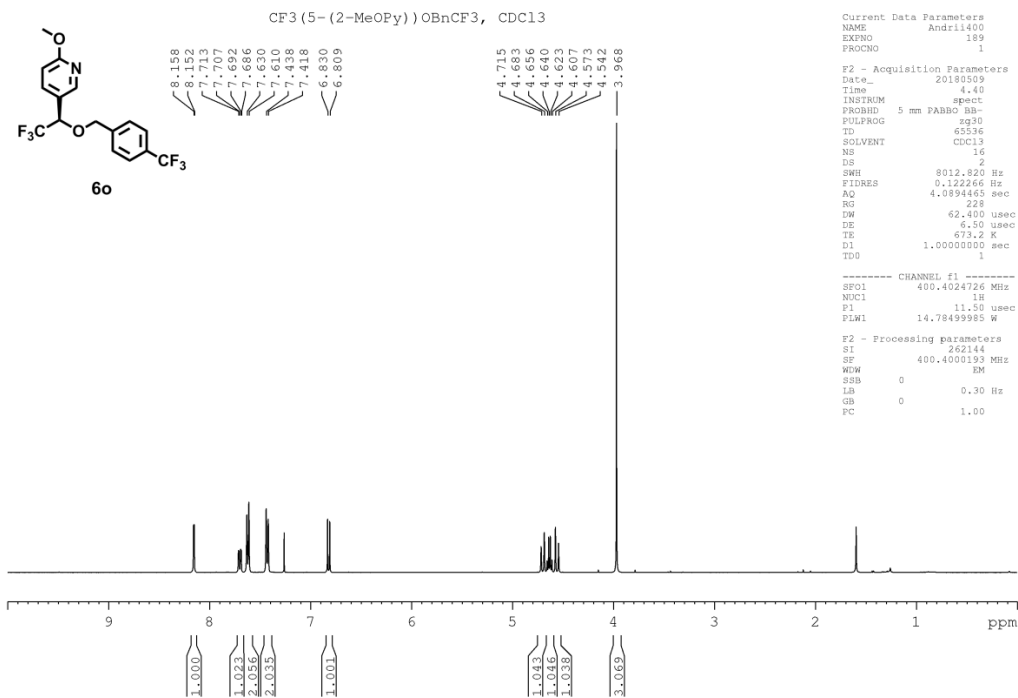

Supplementary figure 101.  $^1\text{H}$  NMR spectra of **6o** in  $\text{CDCl}_3$

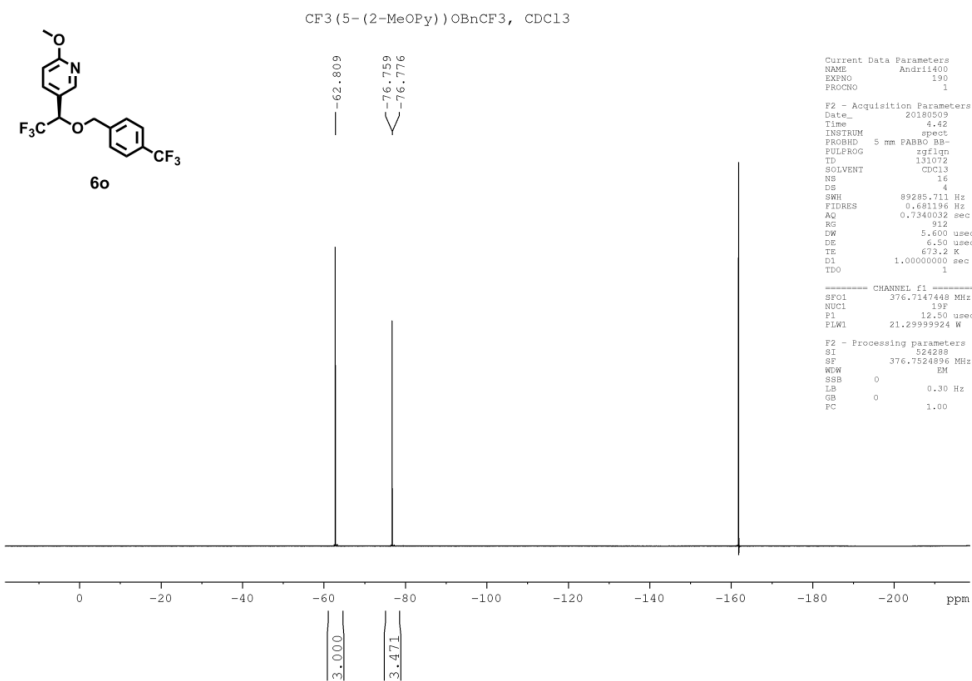

Supplementary figure 102.  $^{19}\text{F}$  NMR spectra of **6o** in  $\text{CDCl}_3$

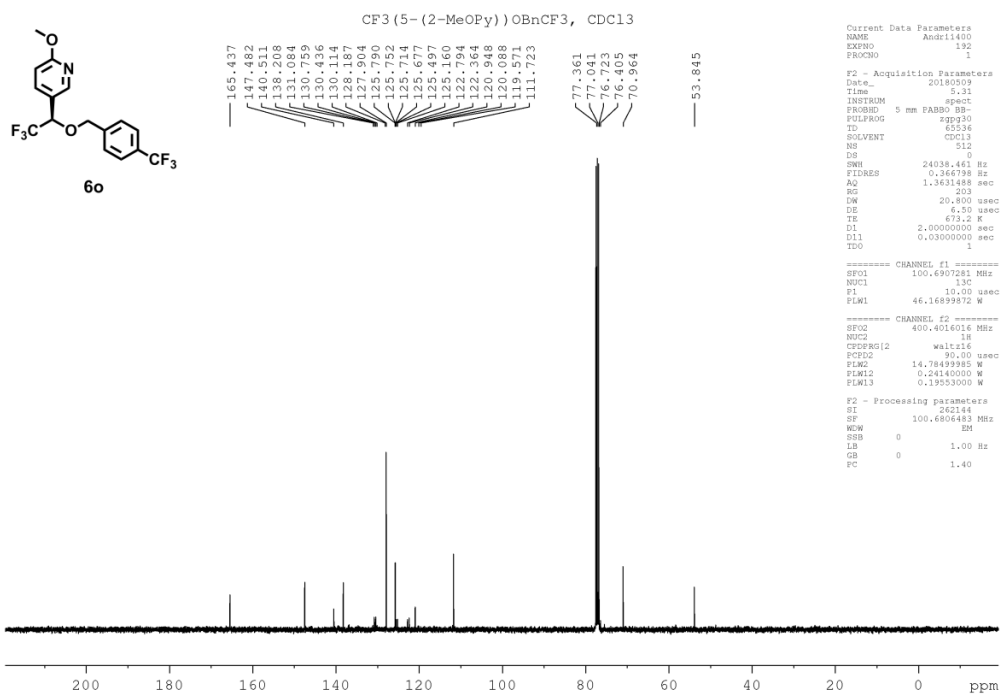

Supplementary figure 103. <sup>13</sup>C NMR spectra of **6o** in CDCl<sub>3</sub>

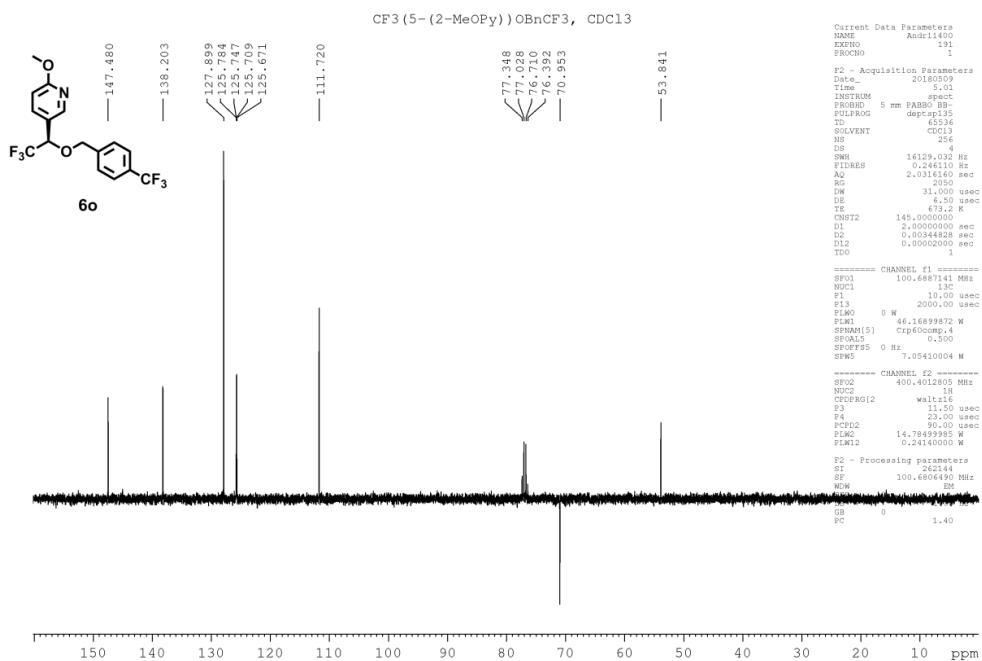

Supplementary figure 104. DEPT-135 NMR spectra of **6e** in CDCl<sub>3</sub>



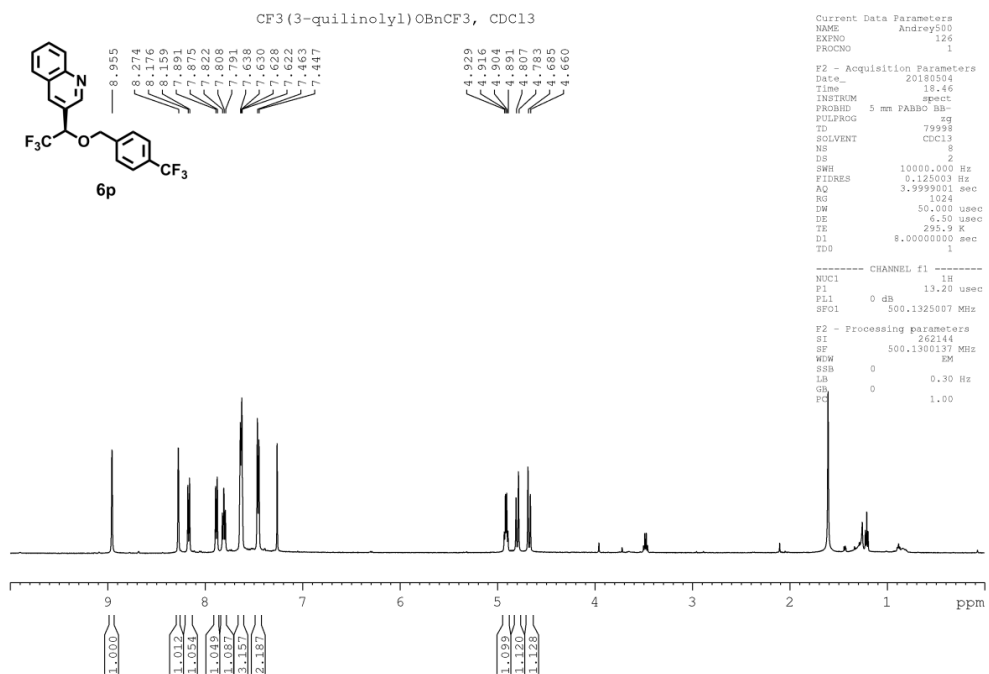

Supplementary figure 105. <sup>1</sup>H NMR spectra of **6p** in CDCl<sub>3</sub>

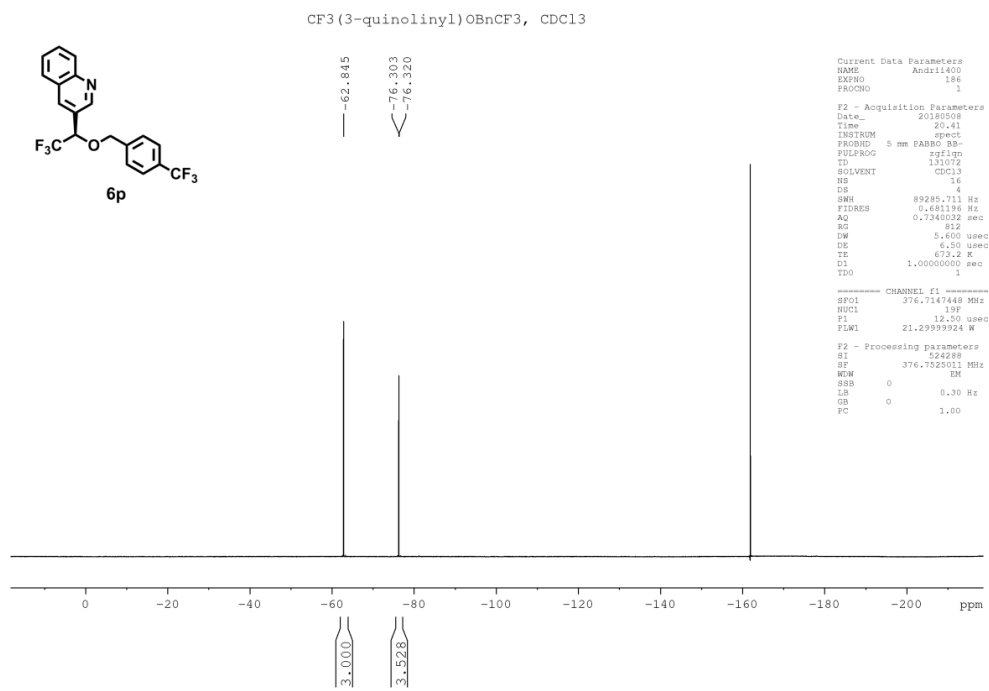

Supplementary figure 106. <sup>19</sup>F NMR spectra of **6p** in CDCl<sub>3</sub>

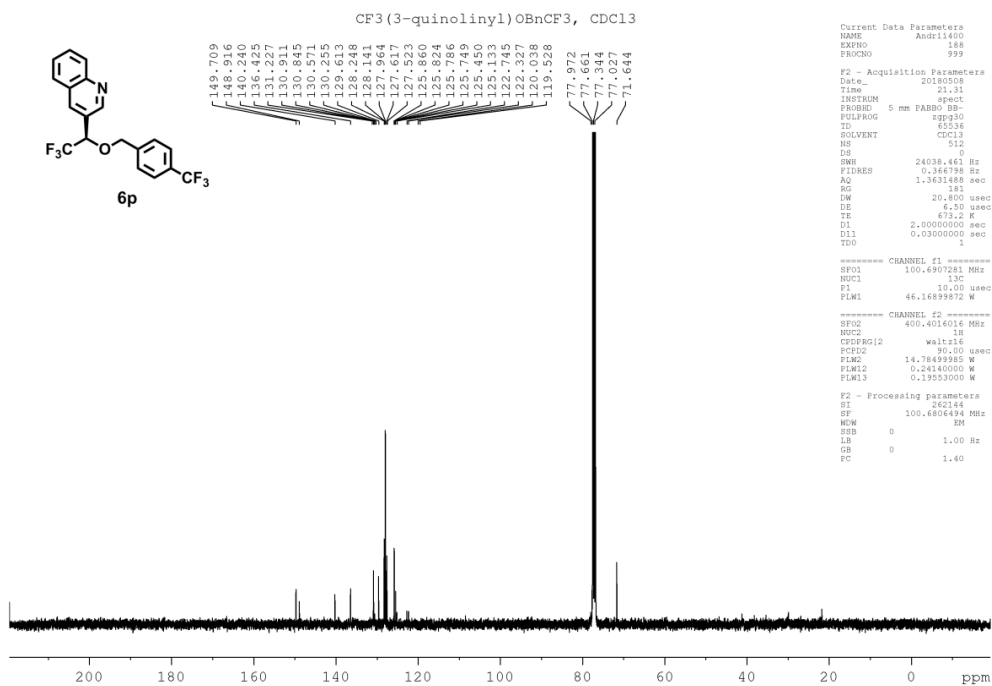

Supplementary figure 107. <sup>13</sup>C NMR spectra of **6p** in CDCl<sub>3</sub>

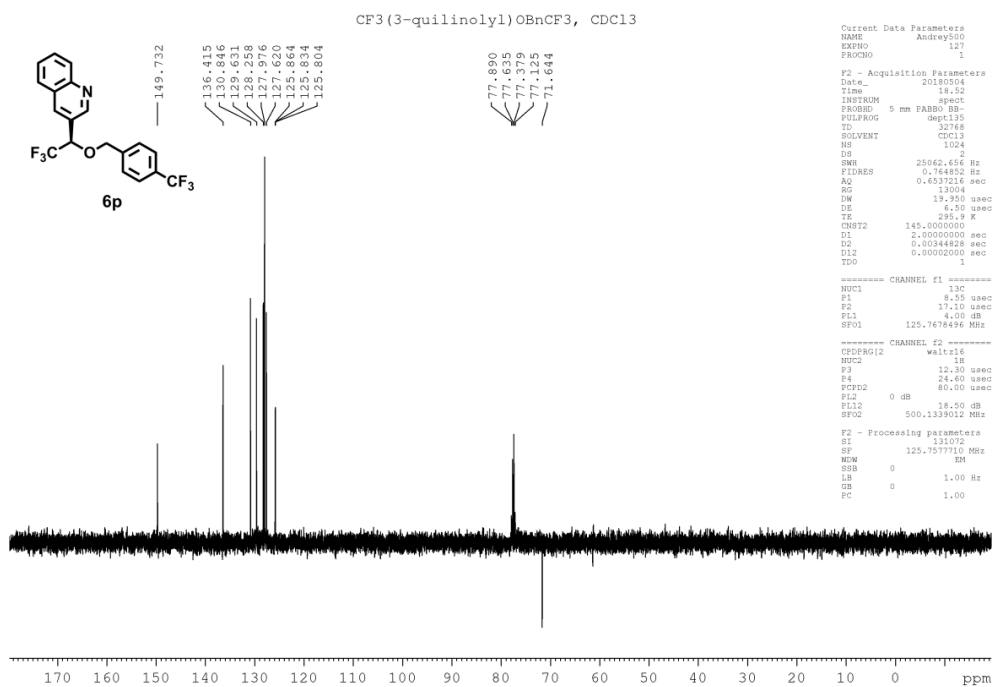

Supplementary figure 108. DEPT-135 spectra of **6p** in CDCl<sub>3</sub>

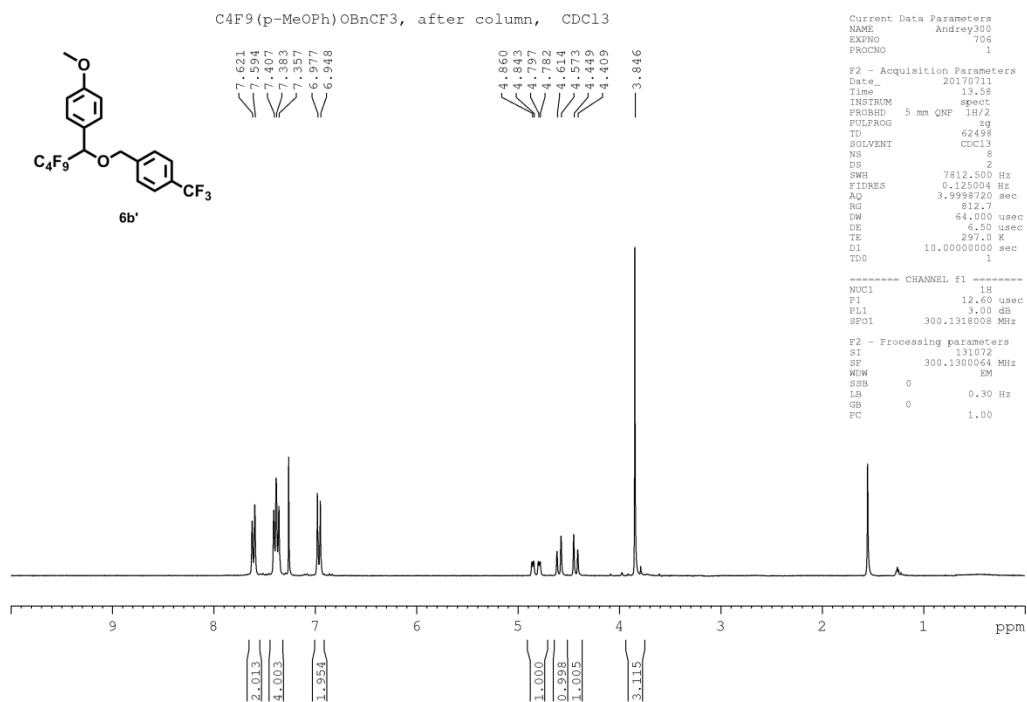

Supplementary figure 109.  $^1\text{H}$  NMR spectra of **6b'** in  $\text{CDCl}_3$

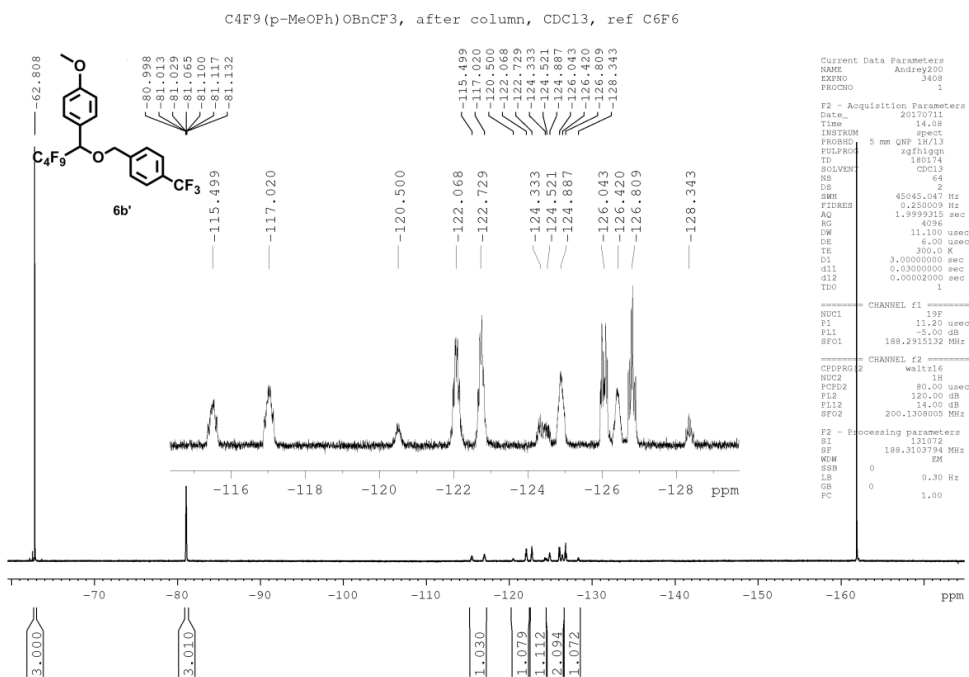

Supplementary figure 110.  $^{19}\text{F}$  NMR spectra of **6b'** in  $\text{CDCl}_3$

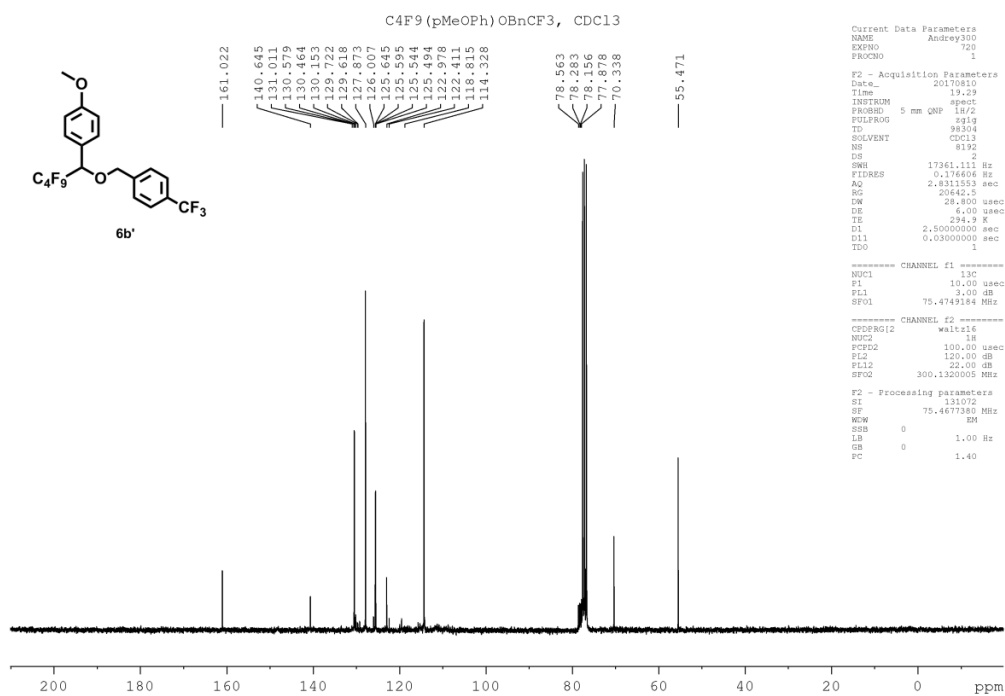

Supplementary figure 111. <sup>13</sup>C NMR spectra of **6b'** in CDCl<sub>3</sub>

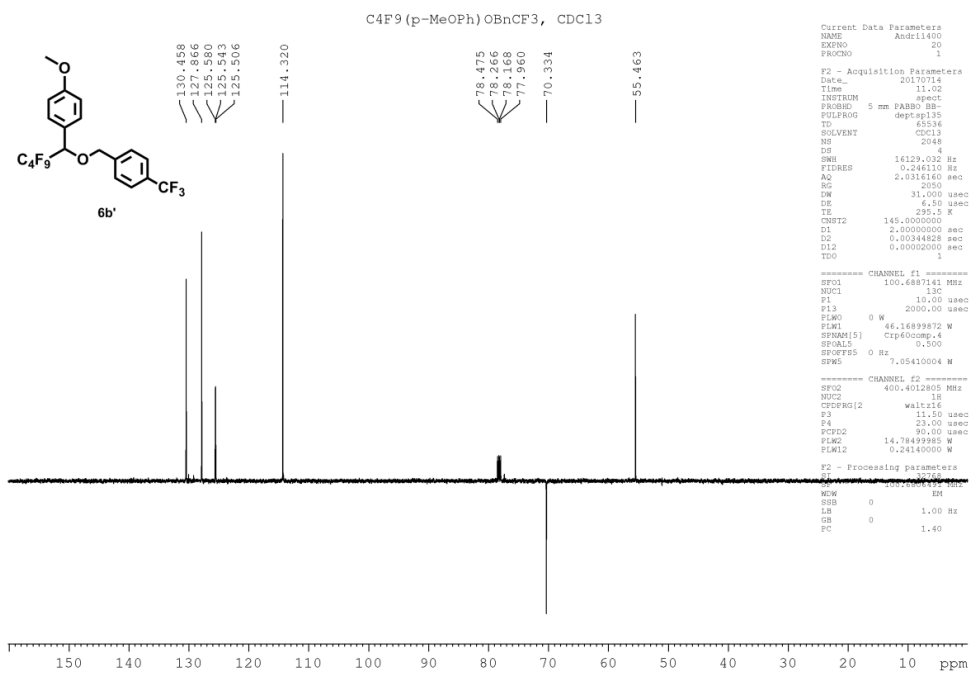

Supplementary figure 112. DEPT-135 NMR spectra of **6b'** in CDCl<sub>3</sub>

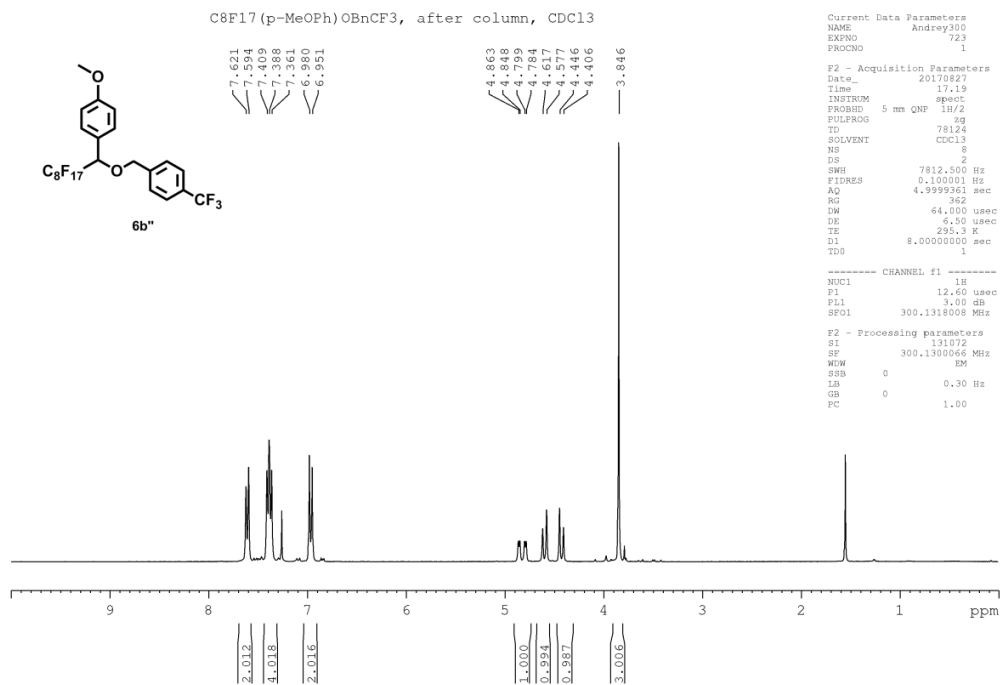

Supplementary figure 113.  $^1\text{H}$  NMR spectra of **6b''** in  $\text{CDCl}_3$

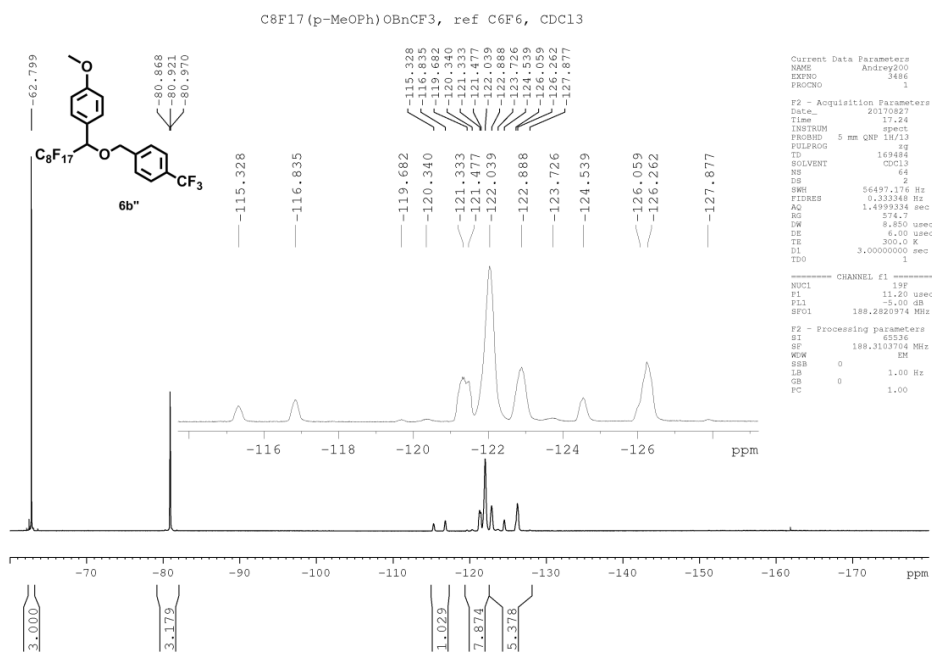

Supplementary figure 114.  $^{19}\text{F}$  NMR spectra of **6b''** in  $\text{CDCl}_3$

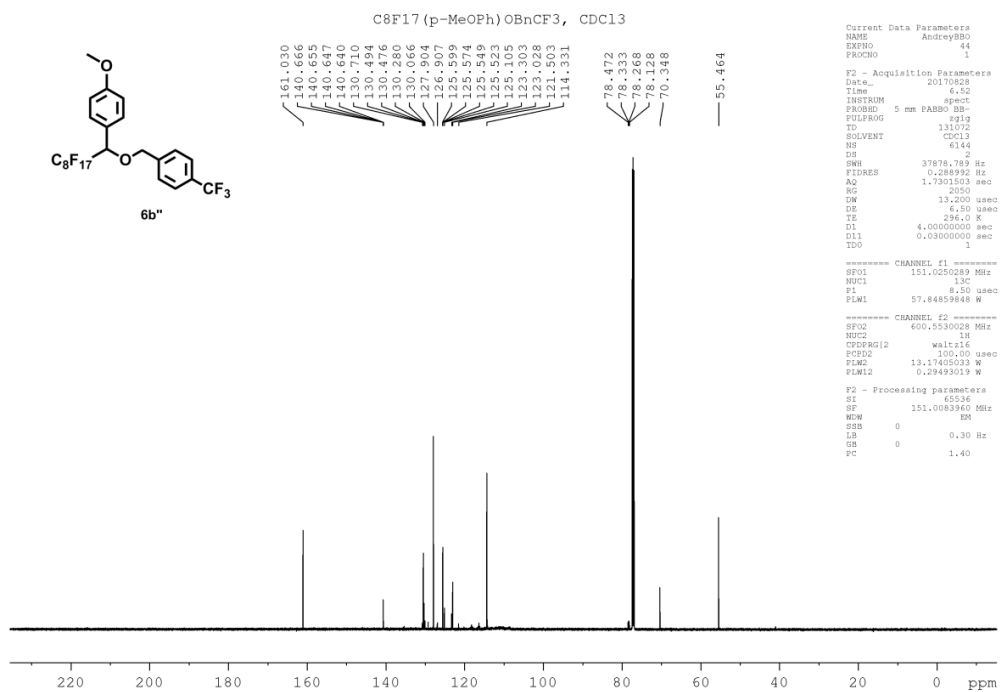

Supplementary figure 115. <sup>13</sup>C NMR spectra of 6b'' in CDCl<sub>3</sub>

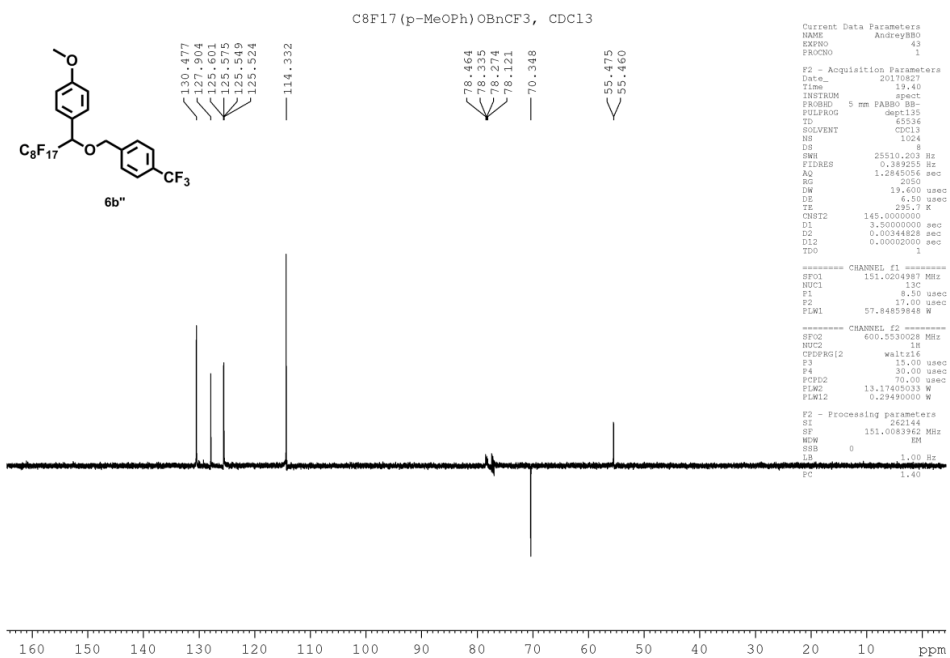

Supplementary figure 116. DEPT-135 NMR spectra of 6b'' in CDCl<sub>3</sub>

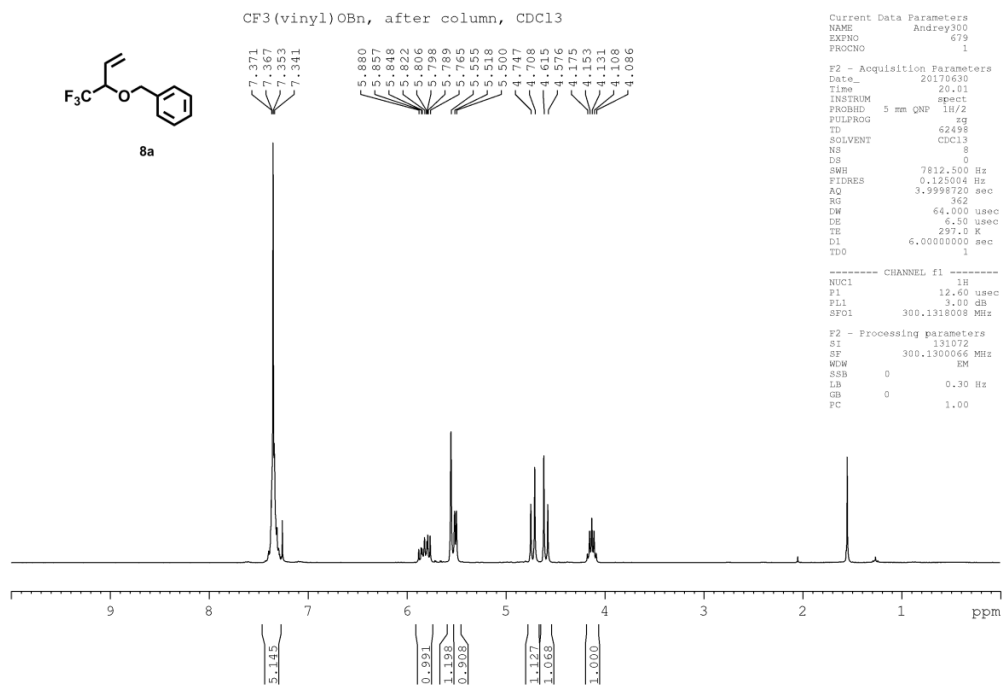

Supplementary figure 117. <sup>1</sup>H NMR spectra of **8a** in CDCl<sub>3</sub>

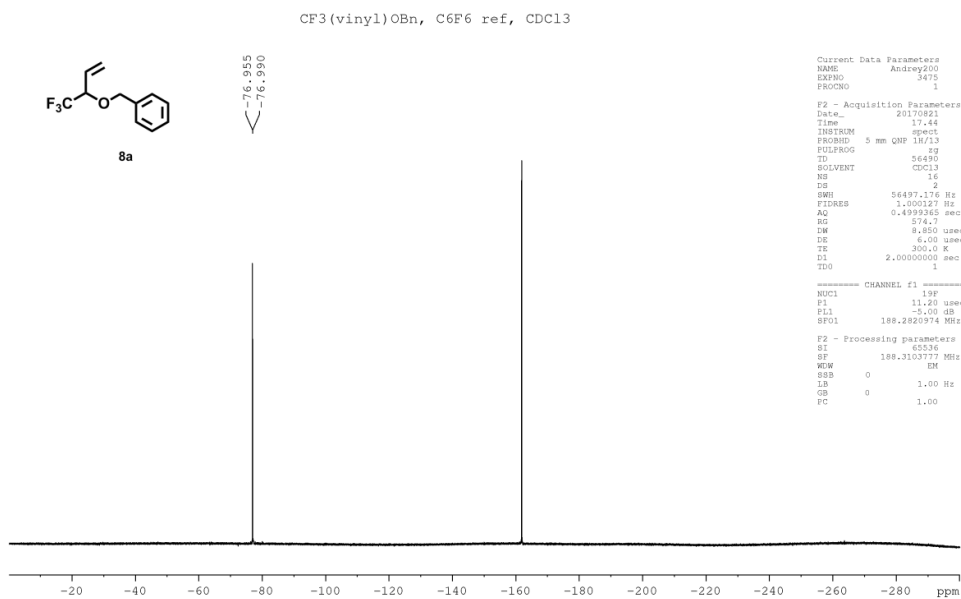

Supplementary figure 118. <sup>19</sup>F NMR spectra of **8a** in CDCl<sub>3</sub>

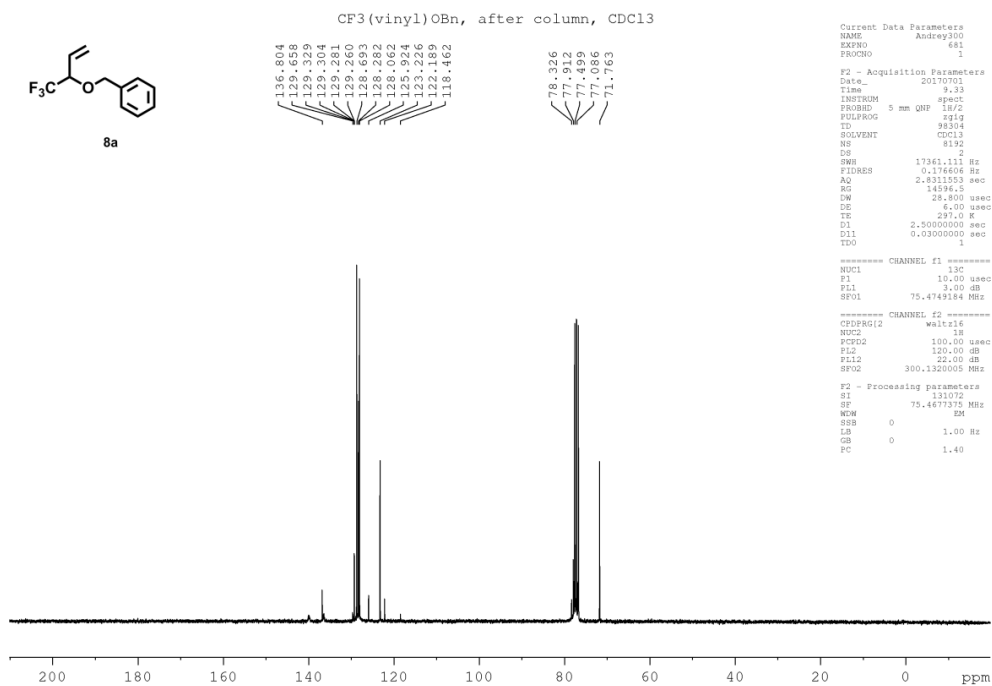

Supplementary figure 119. <sup>13</sup>C NMR spectra of **8a** in CDCl<sub>3</sub>

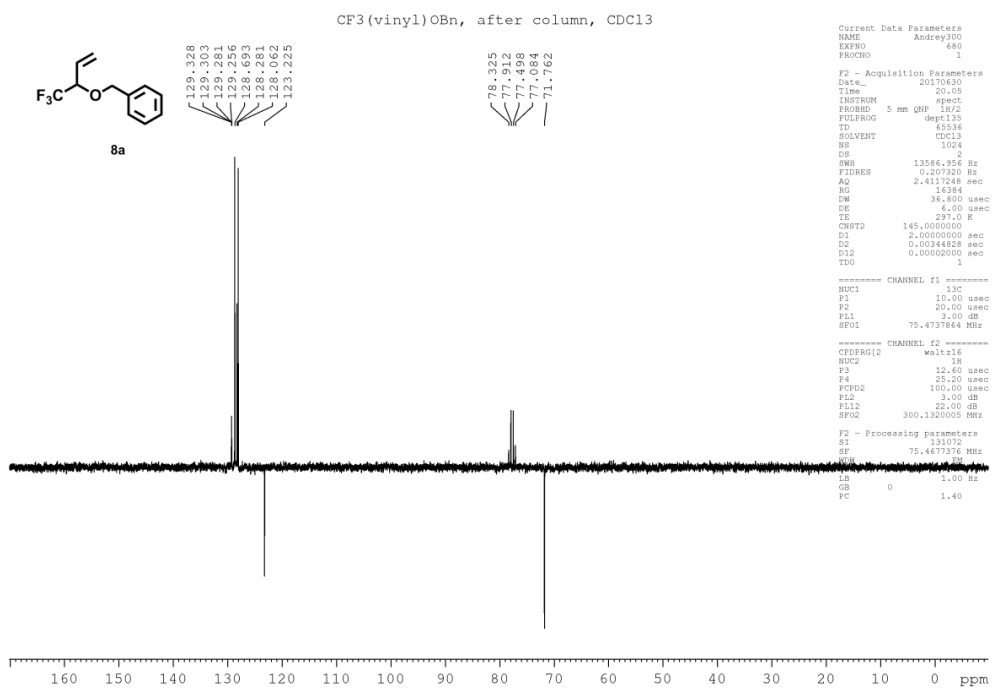

Supplementary figure 120. DEPT-135 NMR spectra of **8a** in CDCl<sub>3</sub>



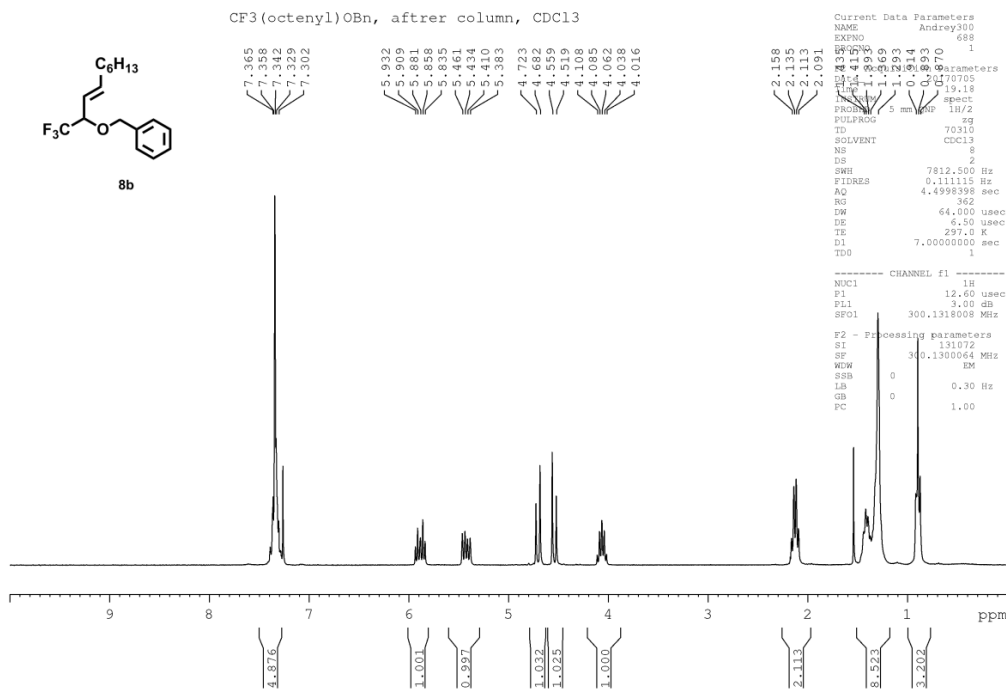

Supplementary figure 121.  $^1\text{H}$  NMR spectra of **8b** in  $\text{CDCl}_3$

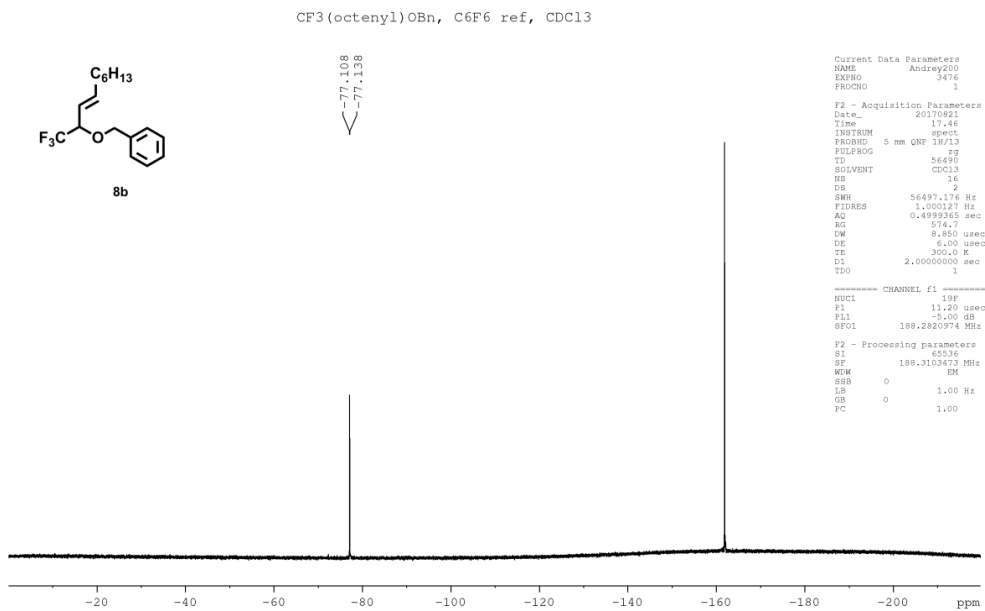

Supplementary figure 122.  $^{19}\text{F}$  NMR spectra of **8b** in  $\text{CDCl}_3$

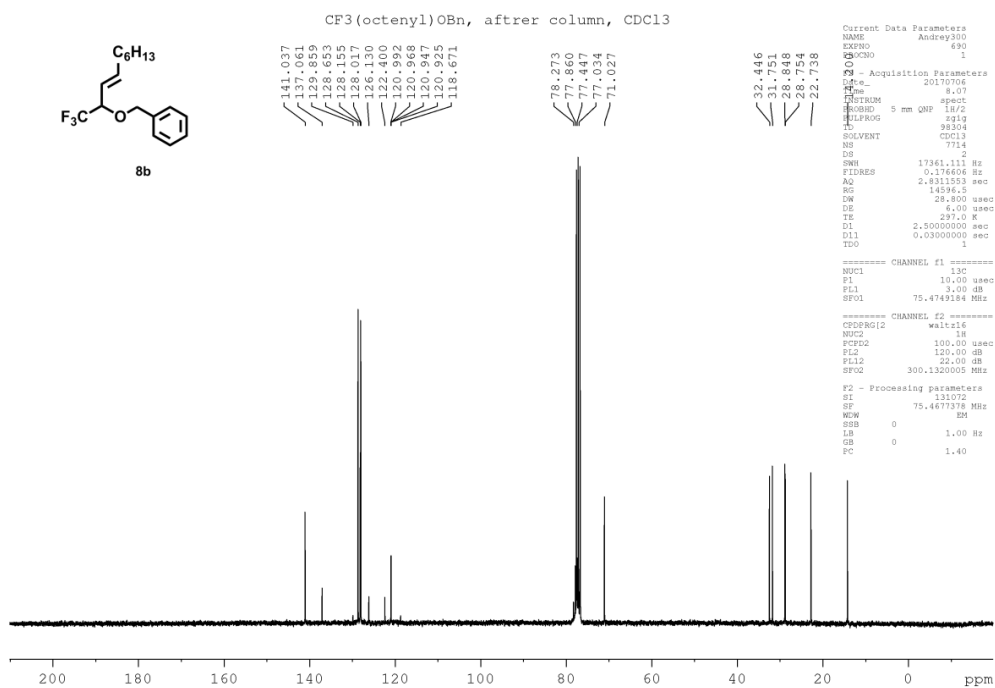

Supplementary figure 123. <sup>13</sup>C NMR spectra of **8b** in CDCl<sub>3</sub>

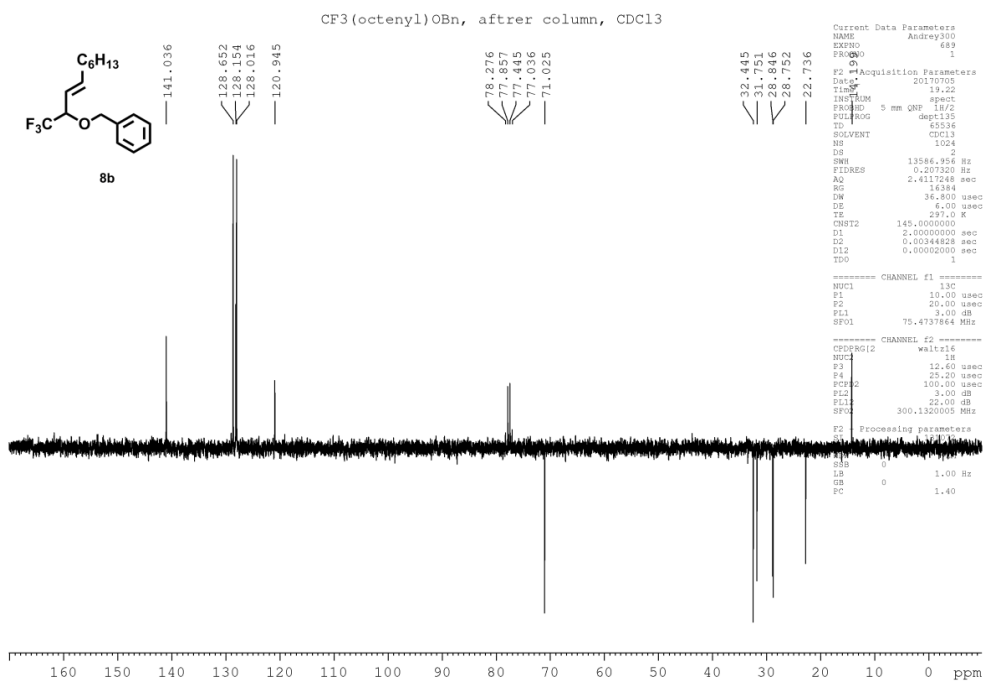

Supplementary figure 124. DEPT-135 NMR spectra of **8b** in CDCl<sub>3</sub>

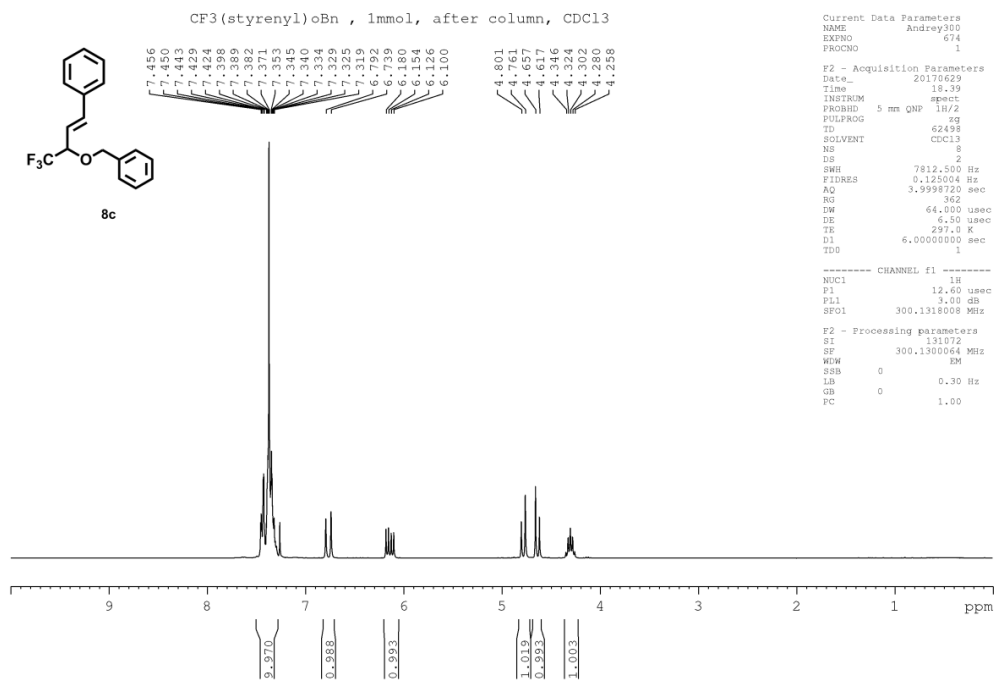

Supplementary figure 125.  $^1\text{H}$  NMR spectra of **8c** in  $\text{CDCl}_3$

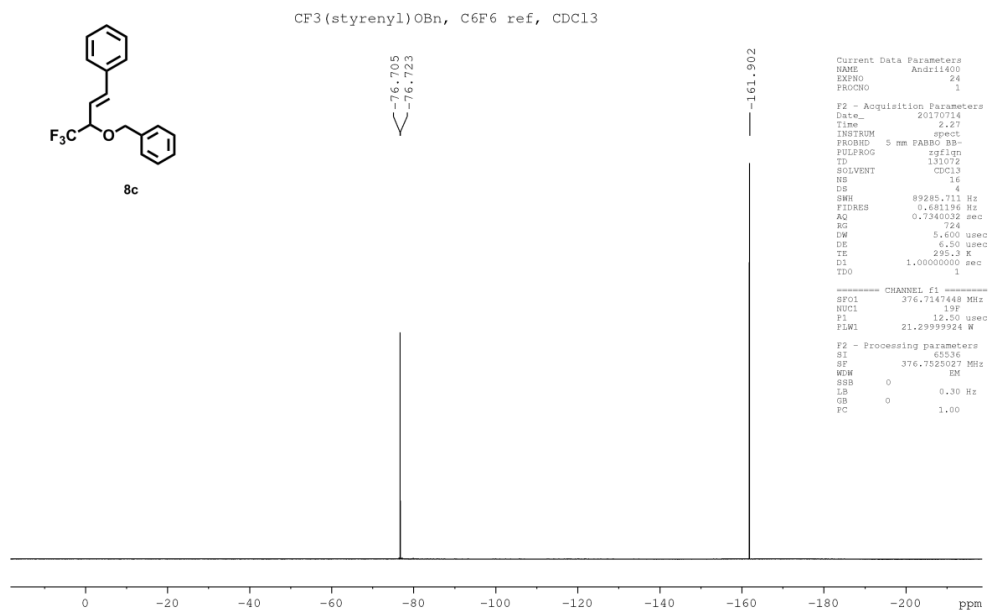

Supplementary figure 126.  $^{19}\text{F}$  NMR spectra of **8c** in  $\text{CDCl}_3$

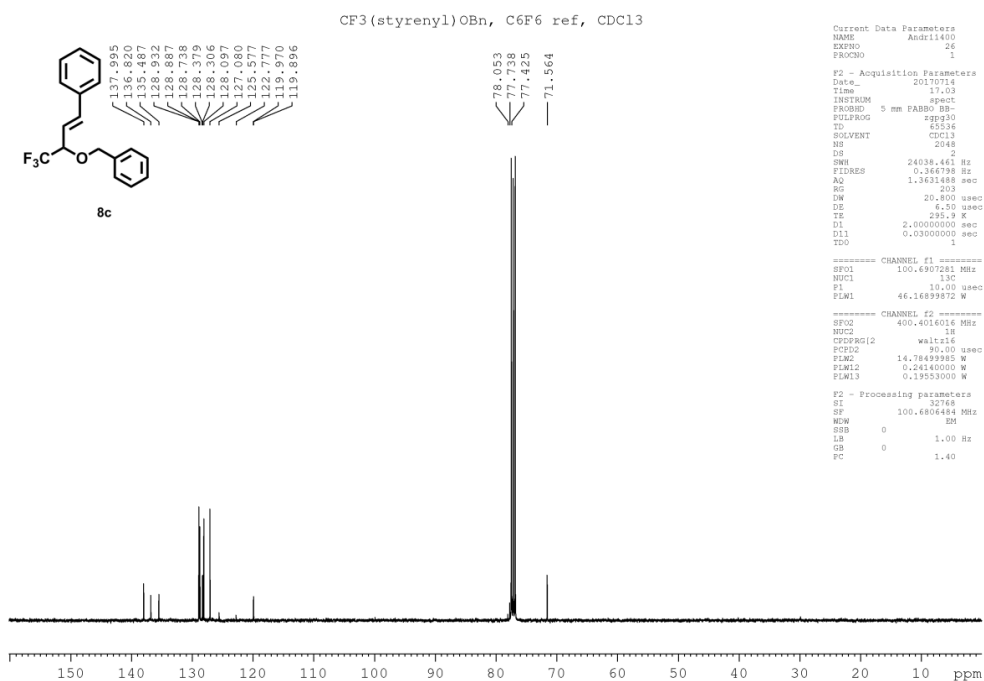

Supplementary figure 127. <sup>13</sup>C NMR spectra of **8c** in CDCl<sub>3</sub>

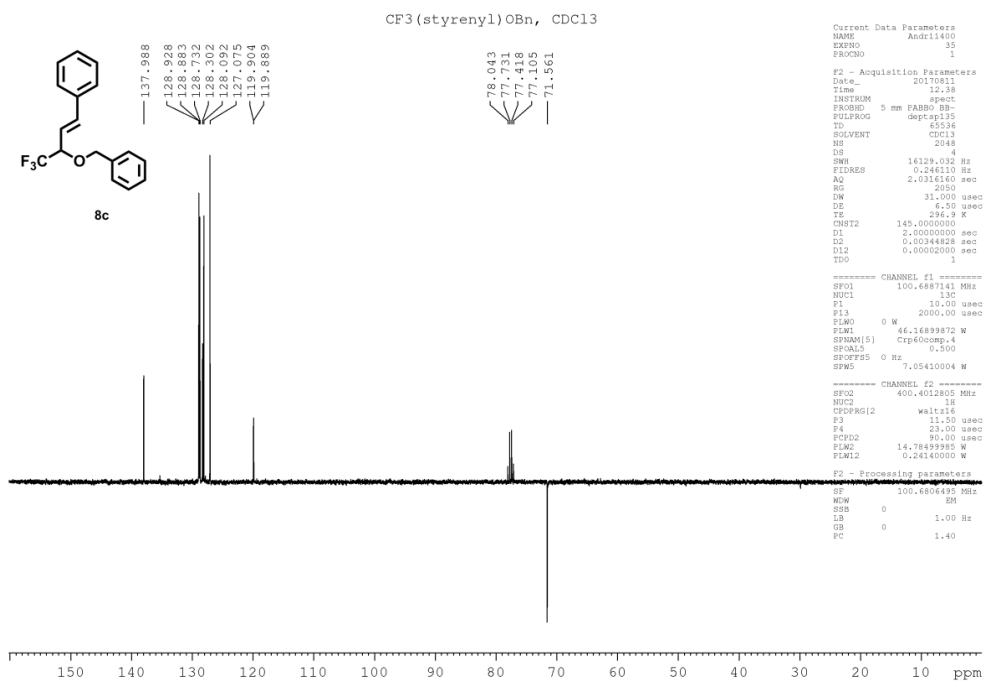

Supplementary figure 128. DEPT-135 NMR spectra of **8c** in CDCl<sub>3</sub>

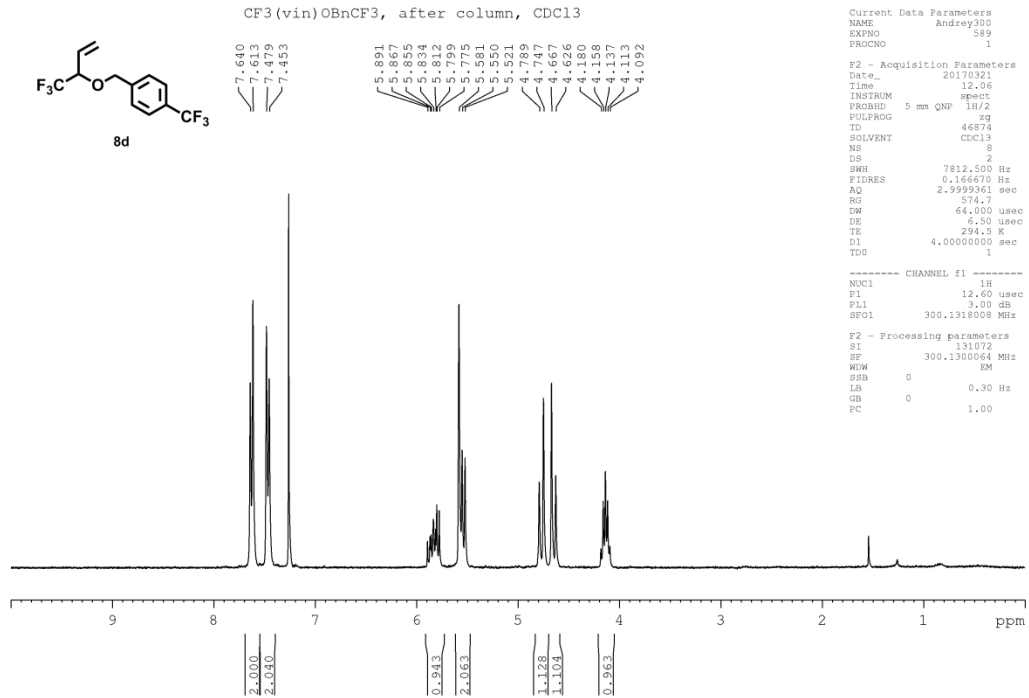

Supplementary figure 129. <sup>1</sup>H NMR spectra of **8d** in CDCl<sub>3</sub>

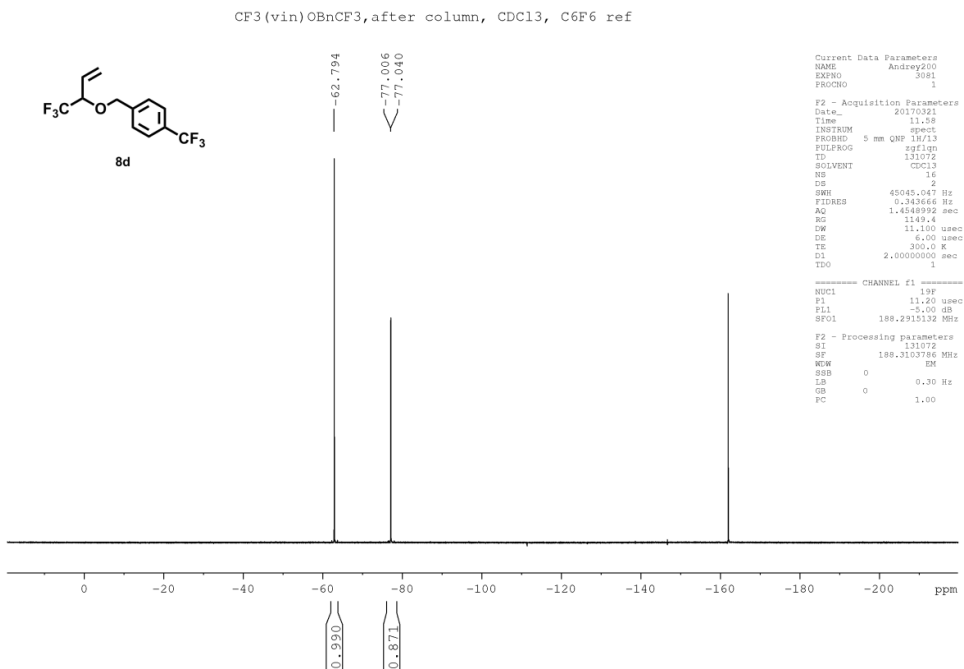

Supplementary figure 130. <sup>19</sup>F NMR spectra of **8d** in CDCl<sub>3</sub>

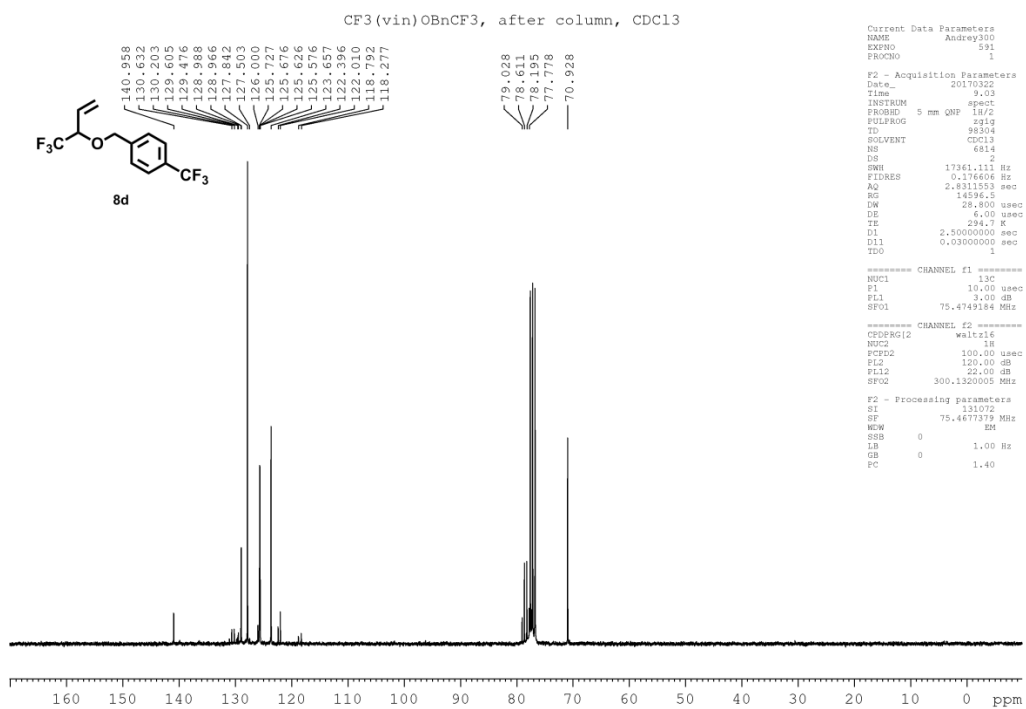

Supplementary figure 131. <sup>13</sup>C NMR spectra of **8d** in CDCl<sub>3</sub>

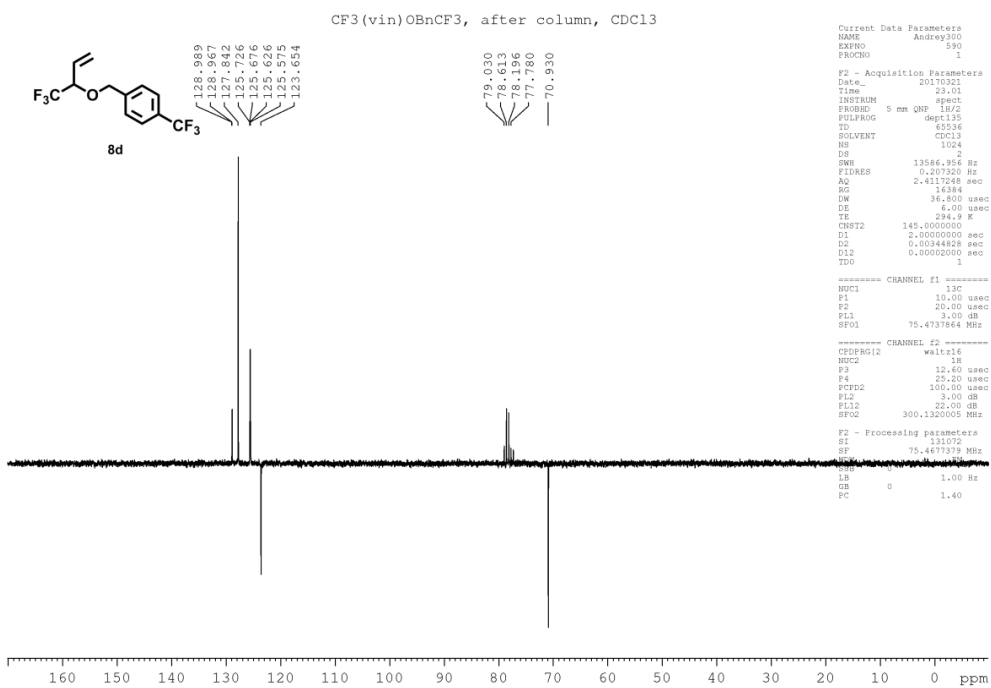

Supplementary figure 132. DEPT-135 NMR spectra of **8d** in CDCl<sub>3</sub>

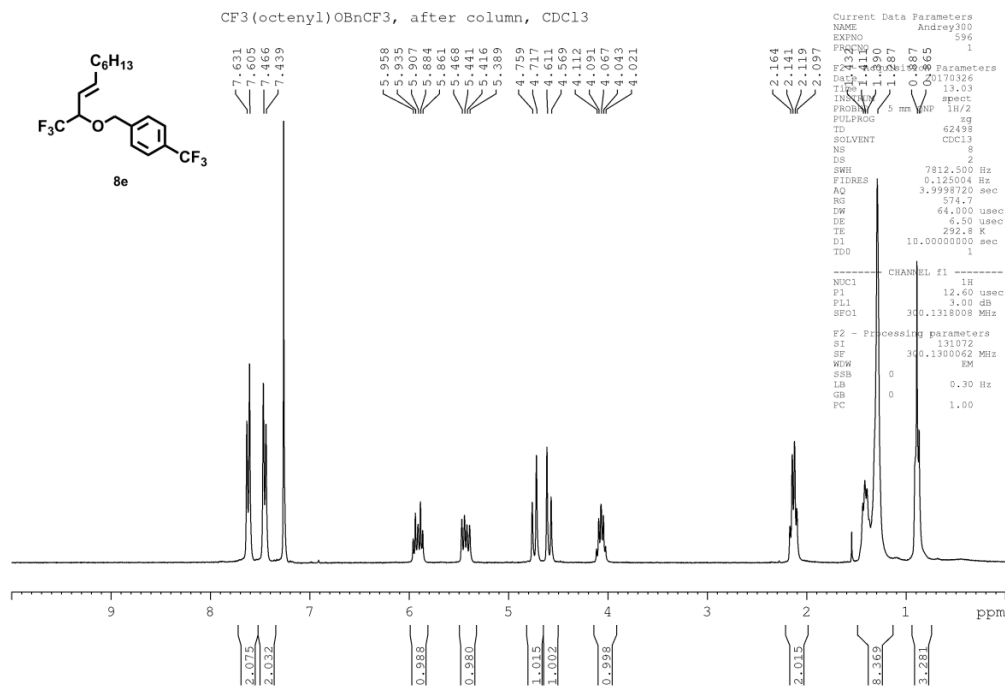

Supplementary figure 133. <sup>1</sup>H NMR spectra of **8e** in CDCl<sub>3</sub>

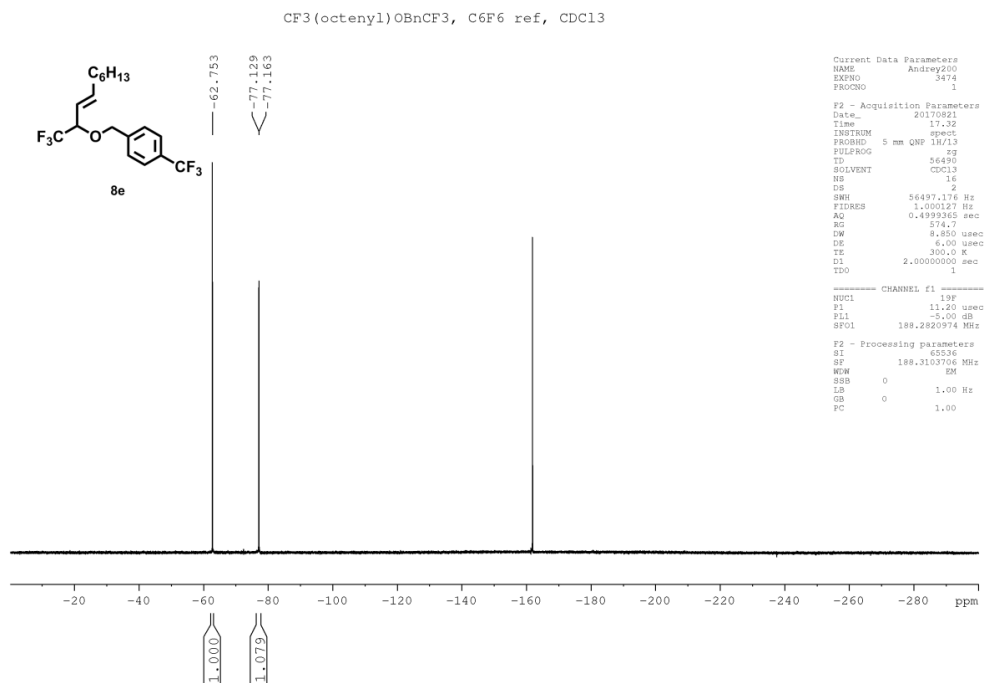

Supplementary figure 134. <sup>19</sup>F NMR spectra of **8e** in CDCl<sub>3</sub>

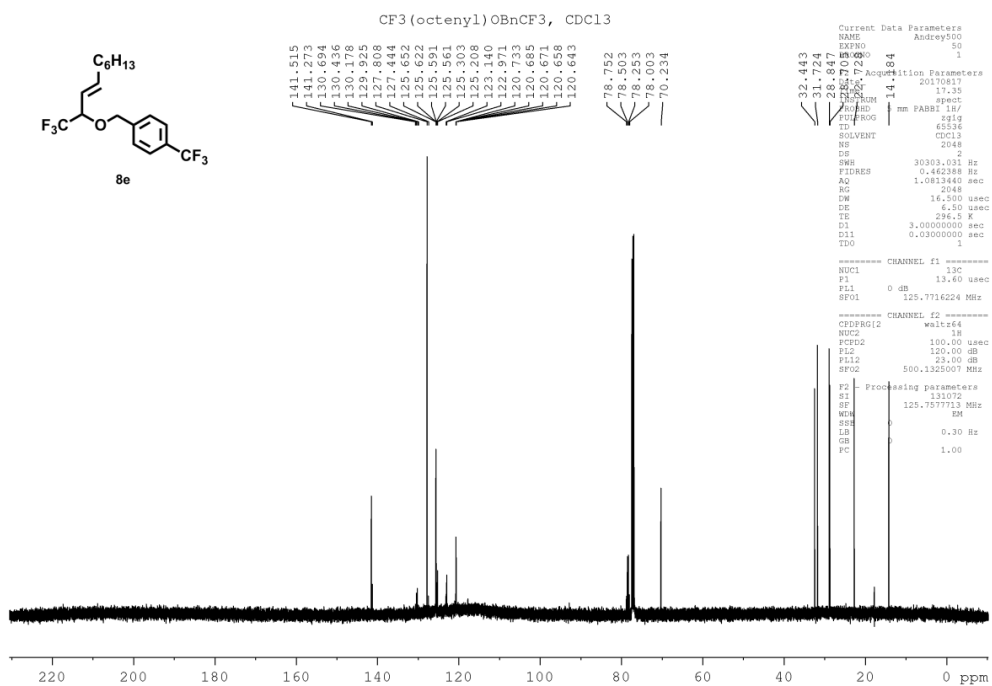

Supplementary figure 135. <sup>13</sup>C NMR spectra of **8e** in CDCl<sub>3</sub>

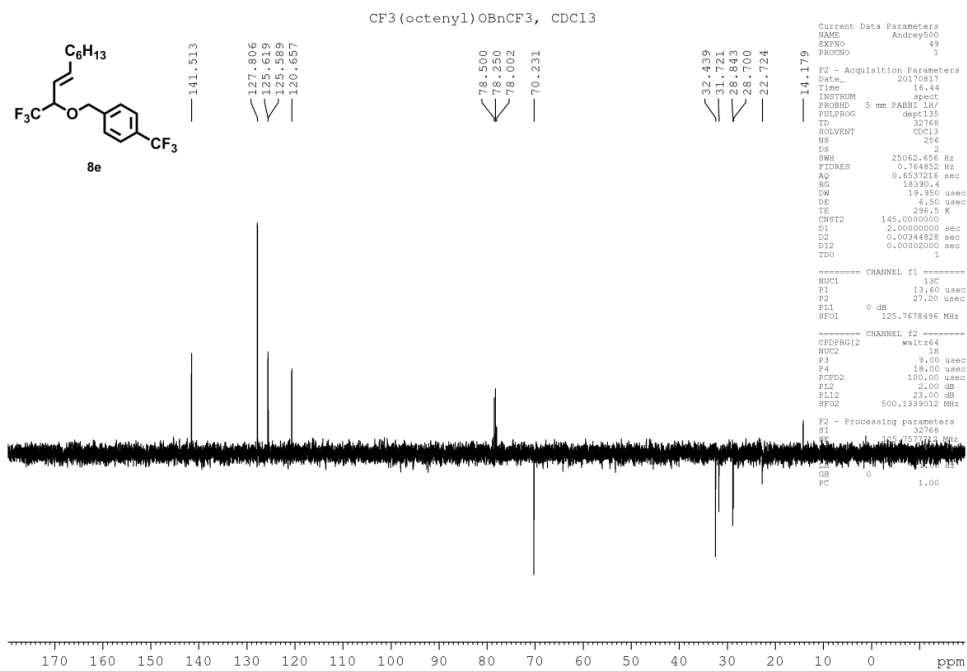

Supplementary figure 136. DEPT-135 NMR spectra of **8e** in CDCl<sub>3</sub>



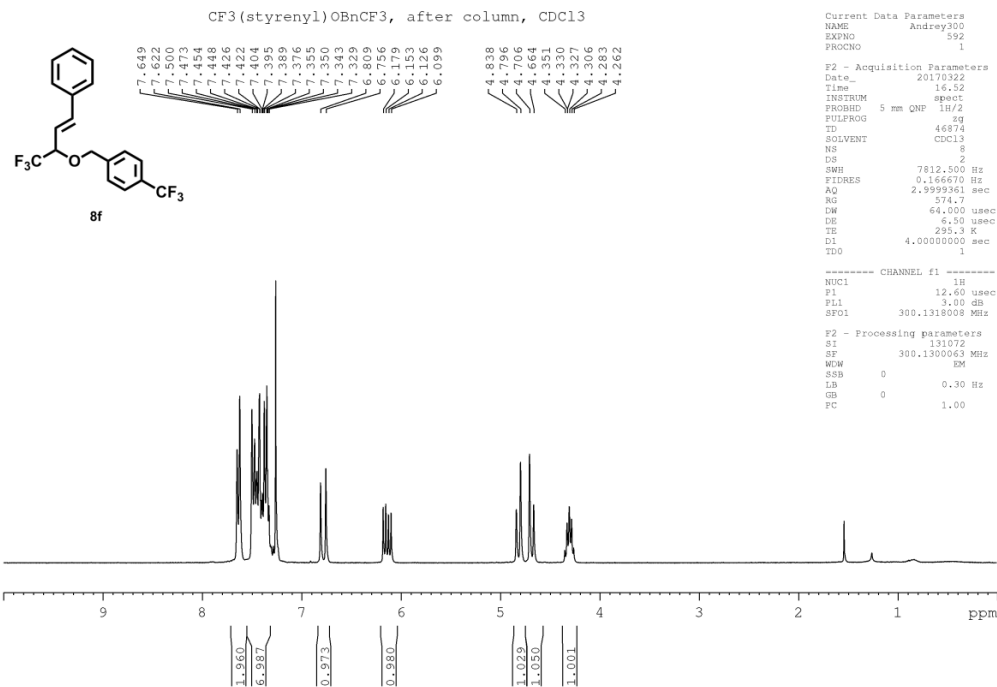

Supplementary figure 137.  $^1\text{H}$  NMR spectra of **8f** in  $\text{CDCl}_3$

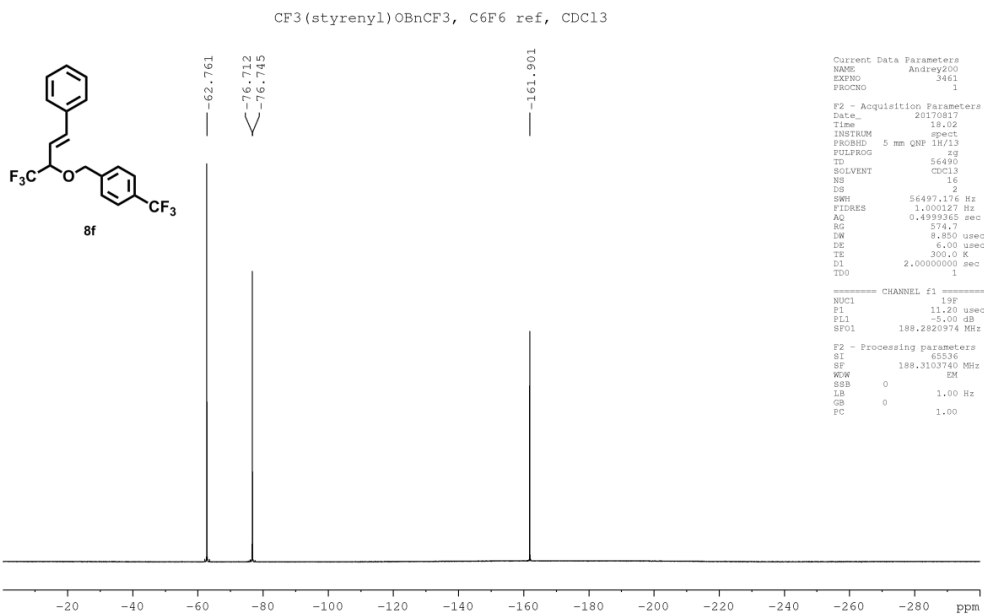

Supplementary figure 138.  $^{19}\text{F}$  NMR spectra of **8f** in  $\text{CDCl}_3$

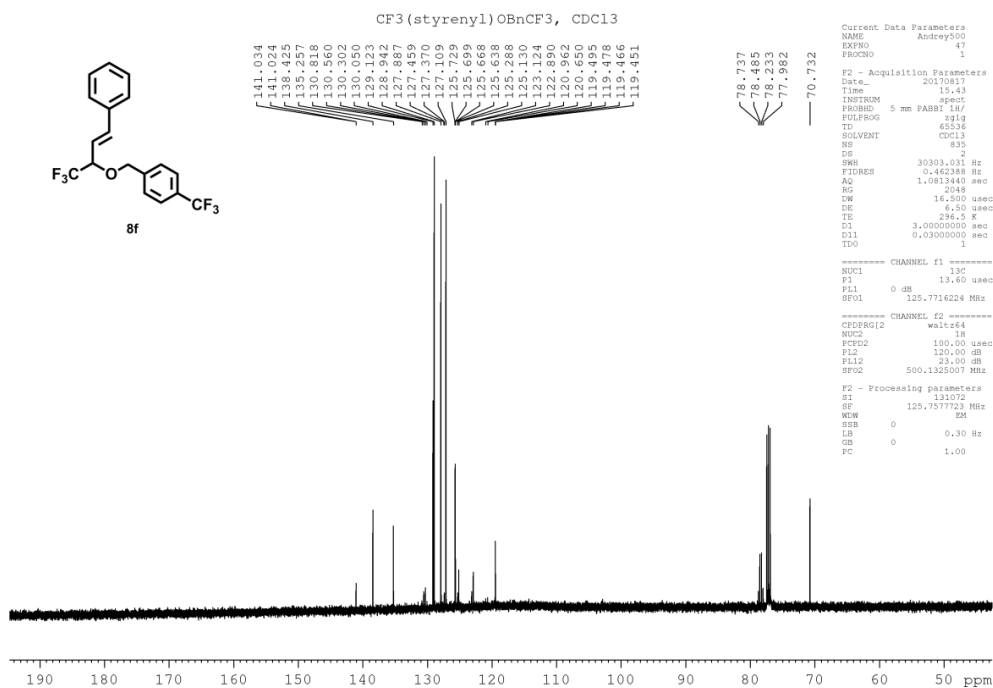

Supplementary figure 139. <sup>13</sup>C NMR spectra of **8f** in CDCl<sub>3</sub>

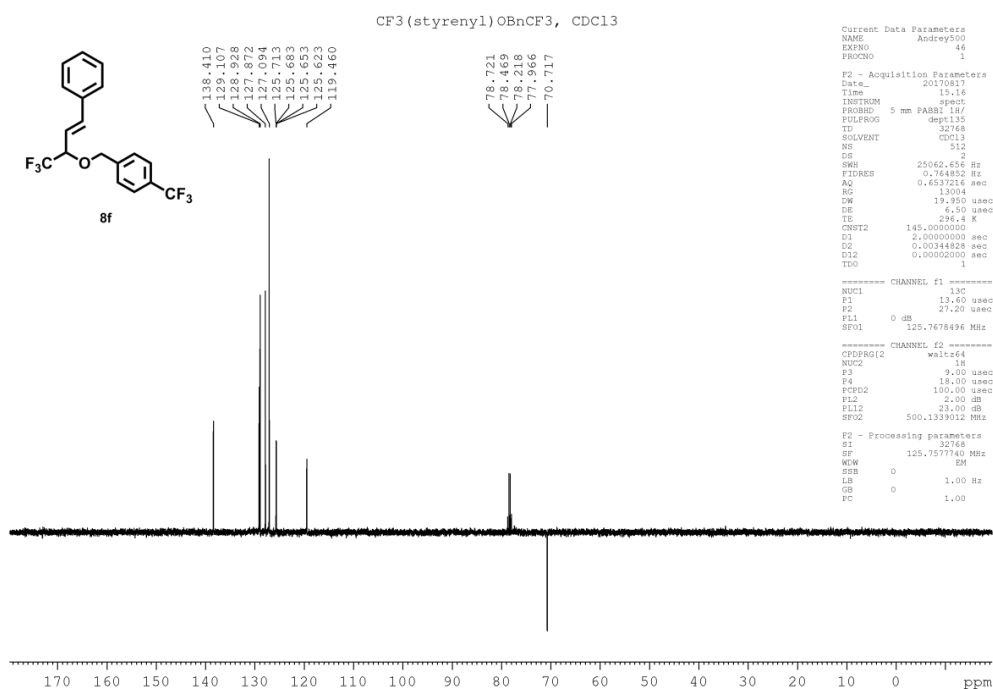

Supplementary figure 140. DEPT-135 NMR spectra of **8f** in CDCl<sub>3</sub>

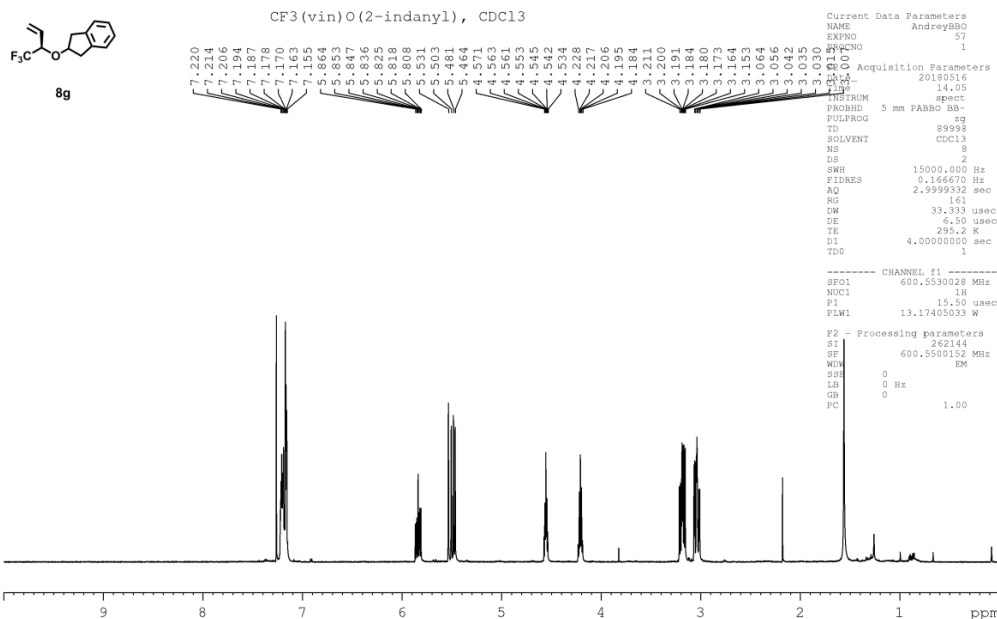

Supplementary figure 141. <sup>1</sup>H NMR spectra of **8g** in CDCl<sub>3</sub>

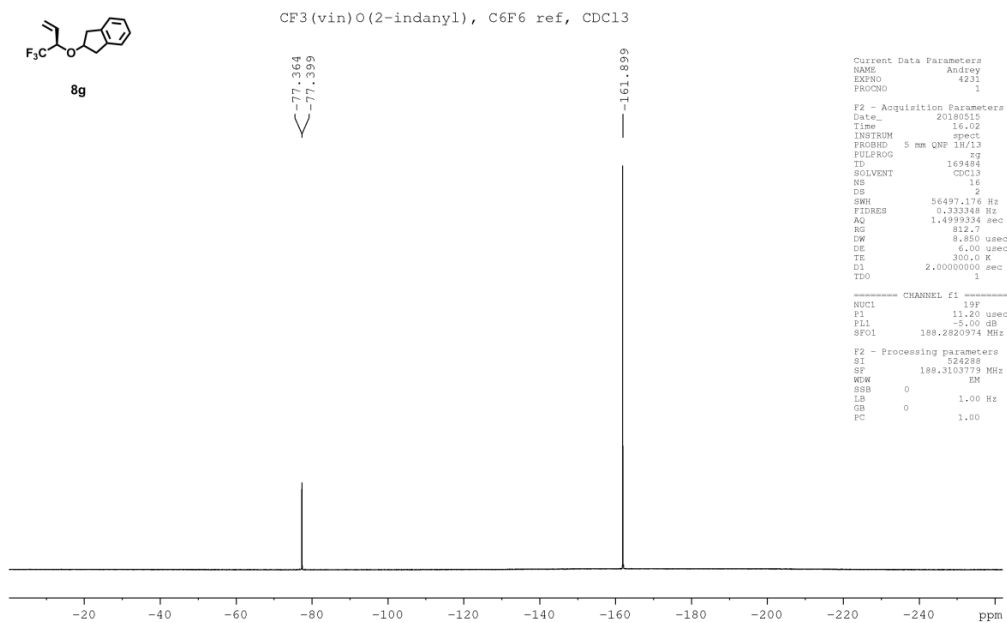

Supplementary figure 142. <sup>19</sup>F NMR spectra of **8g** in CDCl<sub>3</sub>

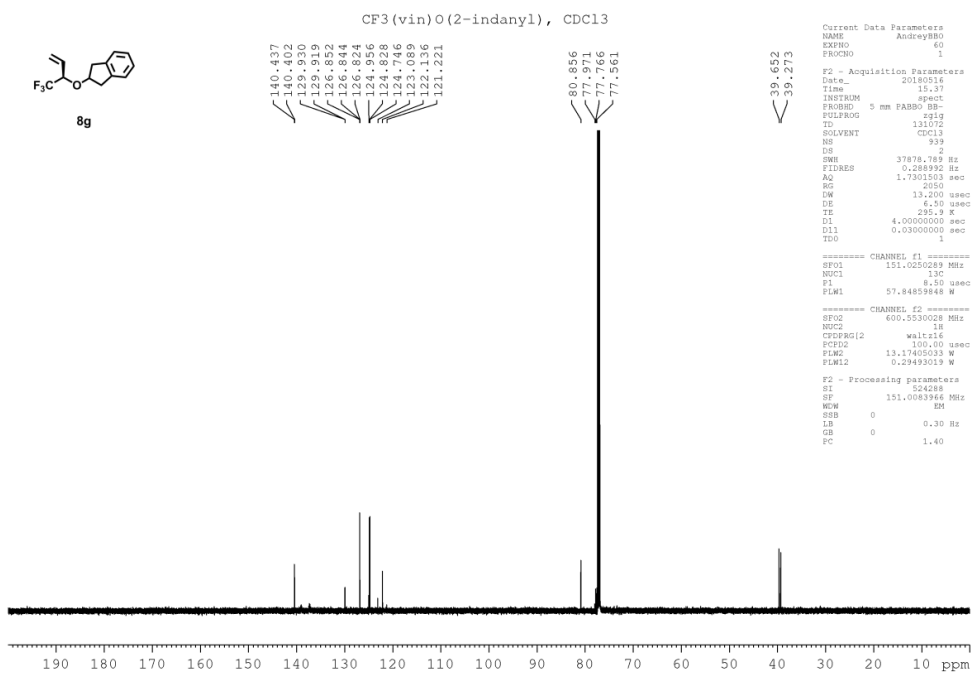

Supplementary figure 143. <sup>13</sup>C NMR spectra of **8g** in CDCl<sub>3</sub>

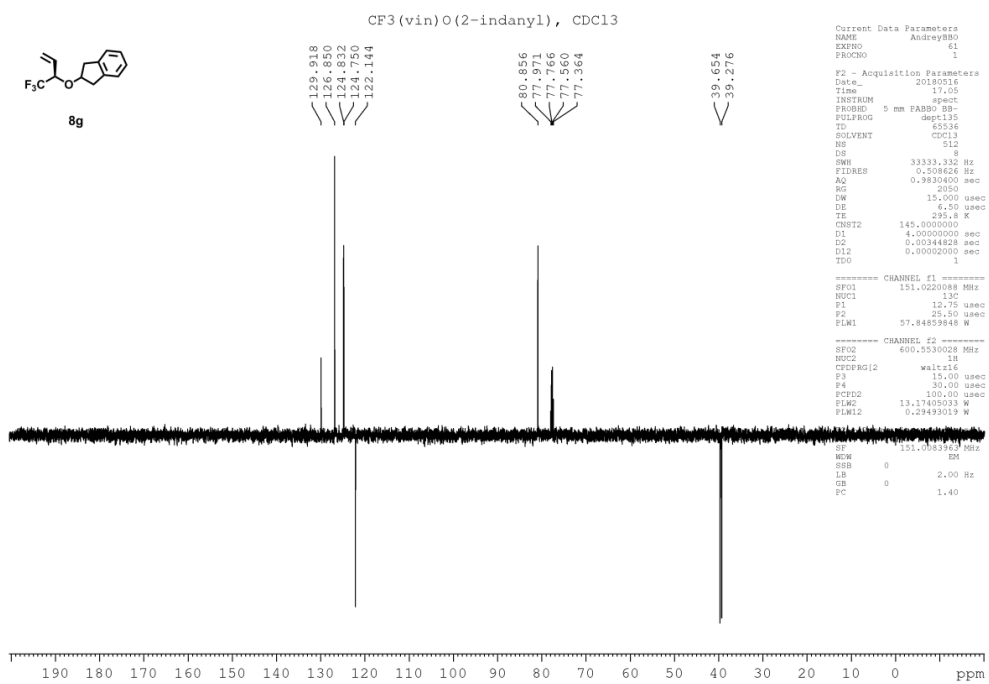

Supplementary figure 144. DEPT-135 NMR spectra of **8g** in CDCl<sub>3</sub>

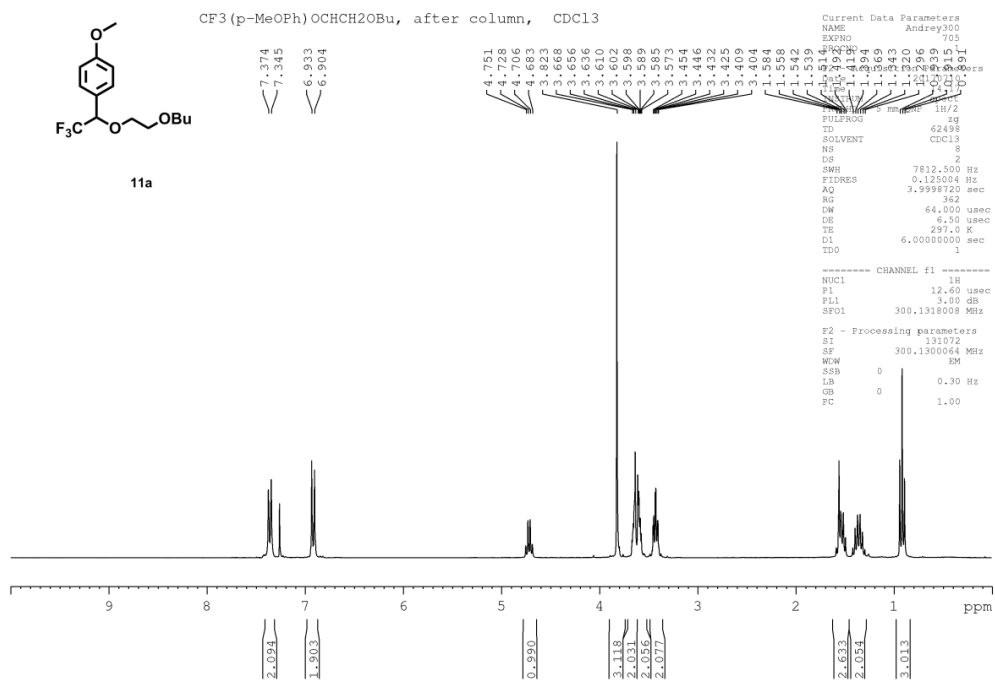

Supplementary figure 145. <sup>1</sup>H NMR spectra of 11a in CDCl<sub>3</sub>

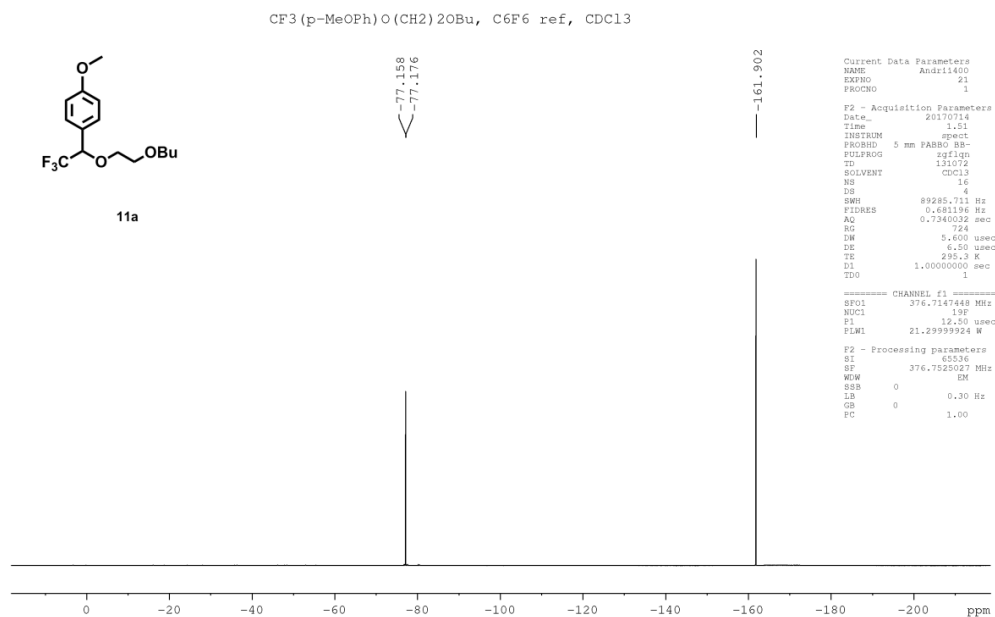

Supplementary figure 146. <sup>19</sup>F NMR spectra of 11a in CDCl<sub>3</sub>

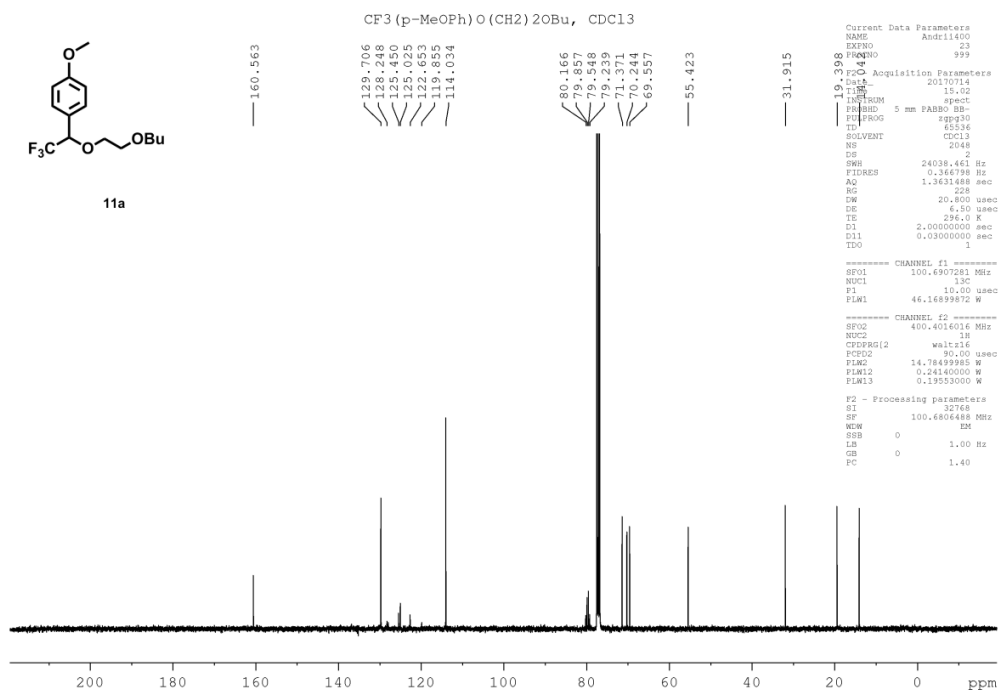

Supplementary figure 147. <sup>13</sup>C NMR spectra of **11a** in CDCl<sub>3</sub>

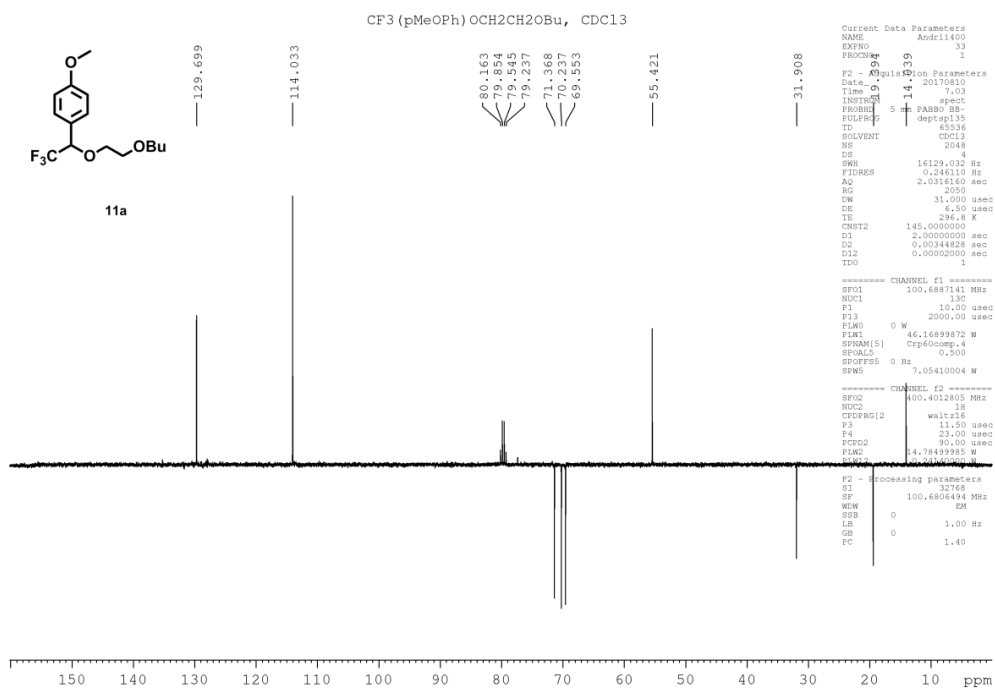

Supplementary figure 148. DEPT-135 NMR spectra of **11a** in CDCl<sub>3</sub>

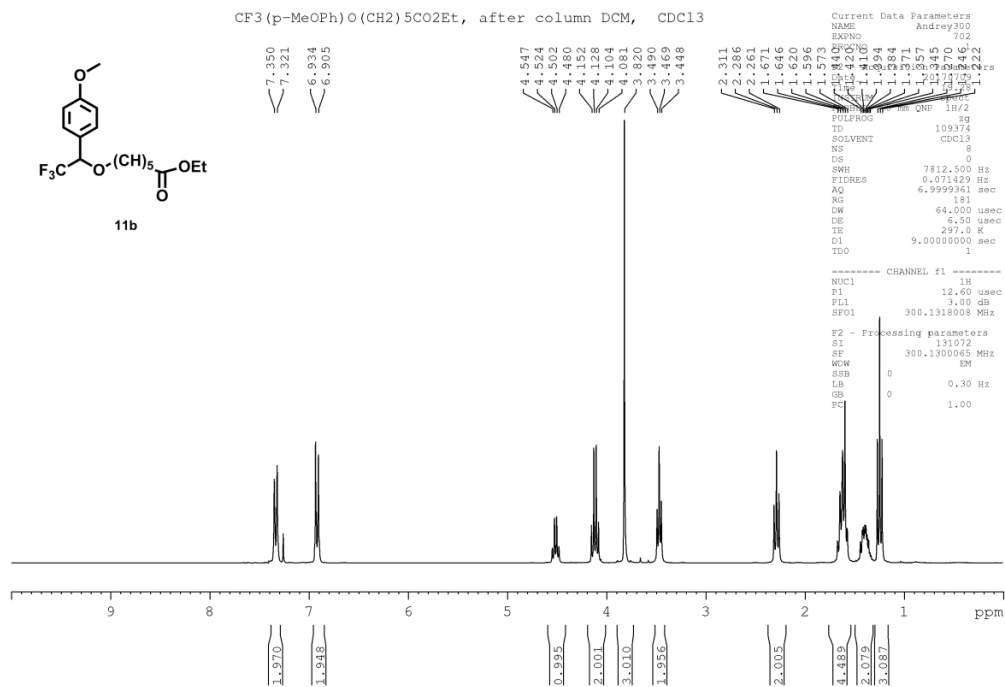

Supplementary figure 149. <sup>1</sup>H NMR spectra of **11b** in CDCl<sub>3</sub>

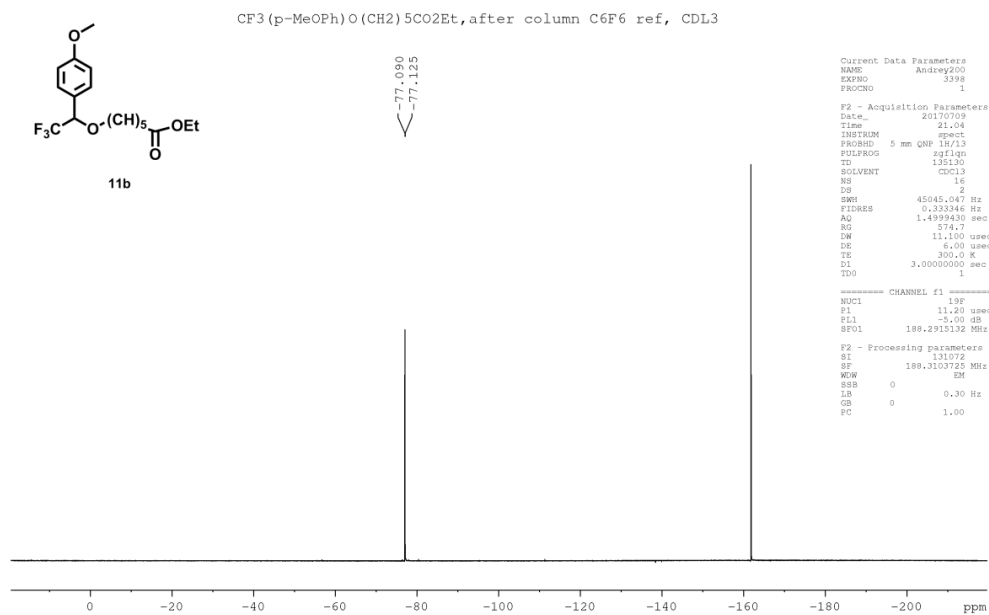

Supplementary figure 150. <sup>19</sup>F NMR spectra of **11b** in CDCl<sub>3</sub>

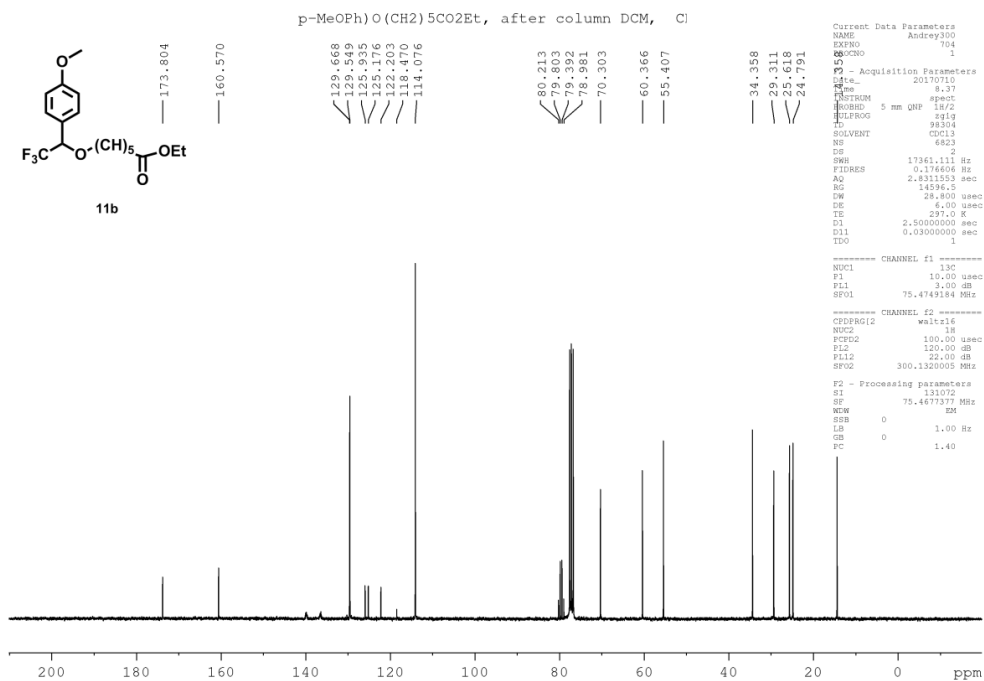

Supplementary figure 151. <sup>13</sup>C NMR spectra of **11b** in CDCl<sub>3</sub>

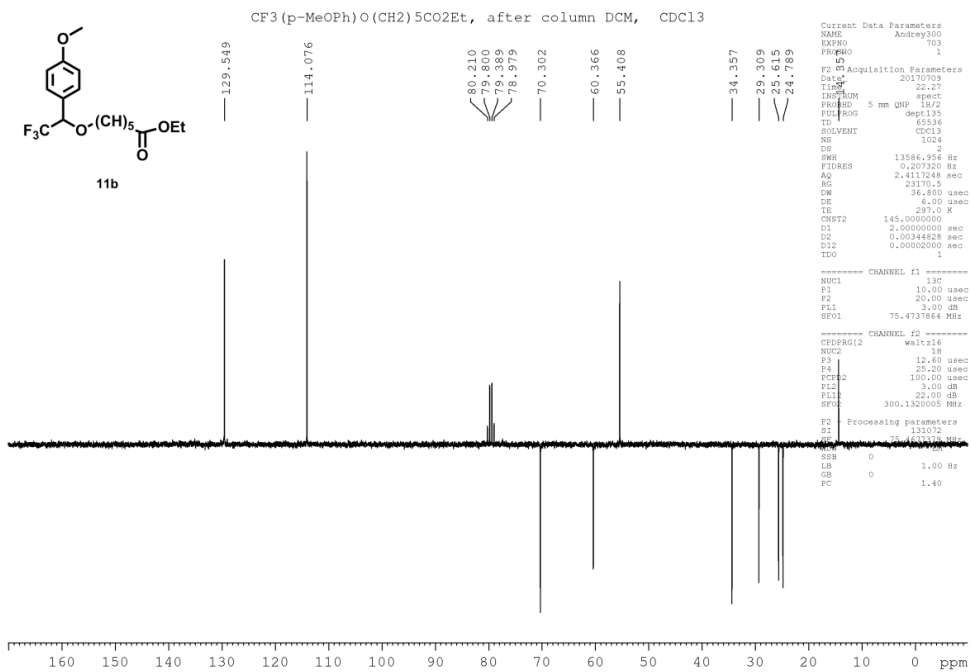

Supplementary figure 152. DEPT-135 NMR spectra of **11b** in CDCl<sub>3</sub>



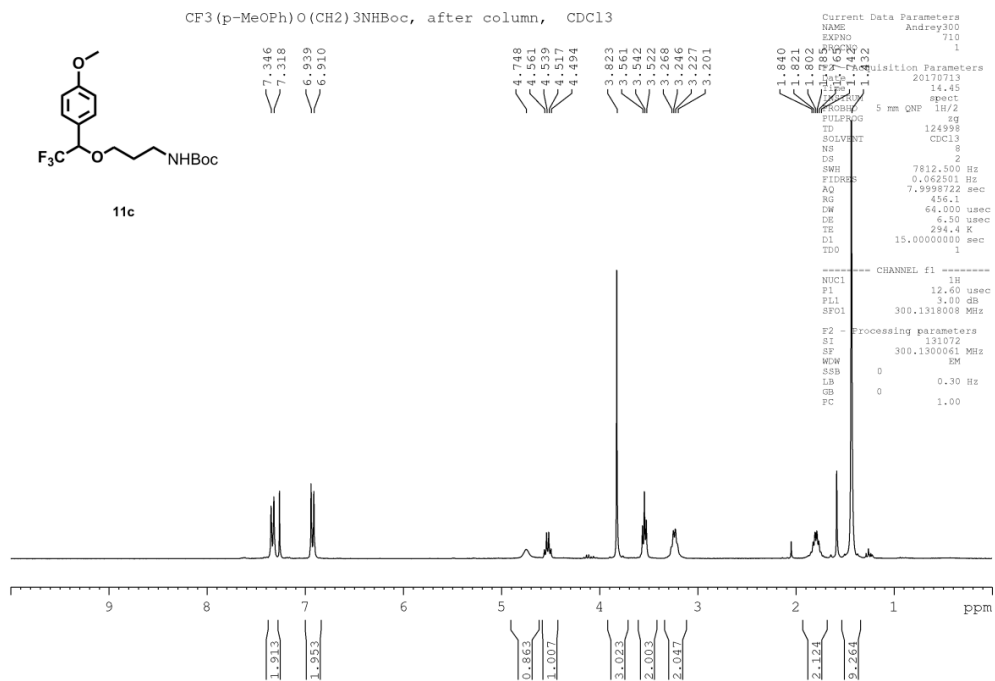

Supplementary figure 153. <sup>1</sup>H NMR spectra of **11c** in CDCl<sub>3</sub>

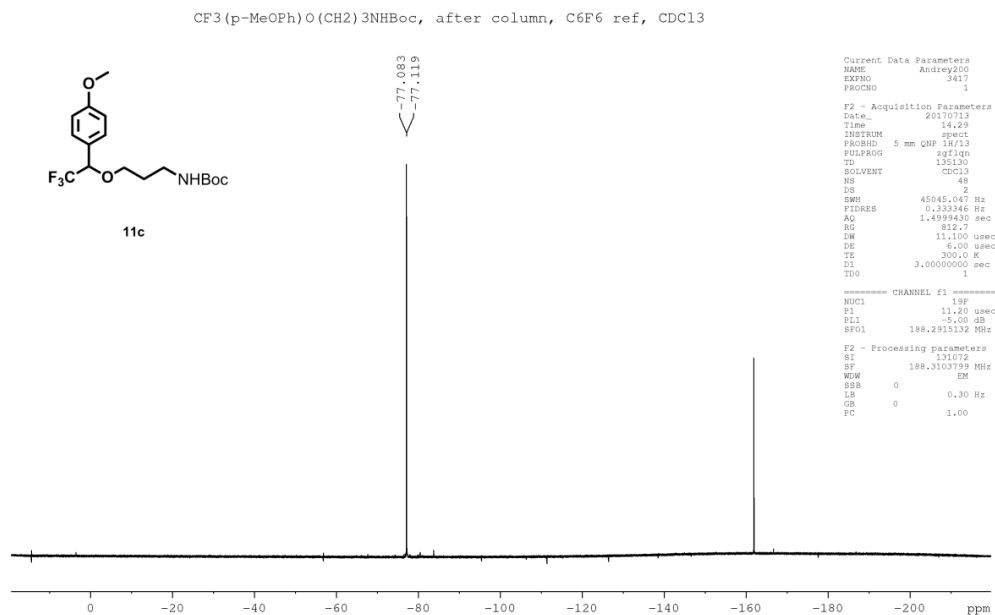

Supplementary figure 154. <sup>19</sup>F NMR spectra of **11c** in CDCl<sub>3</sub>

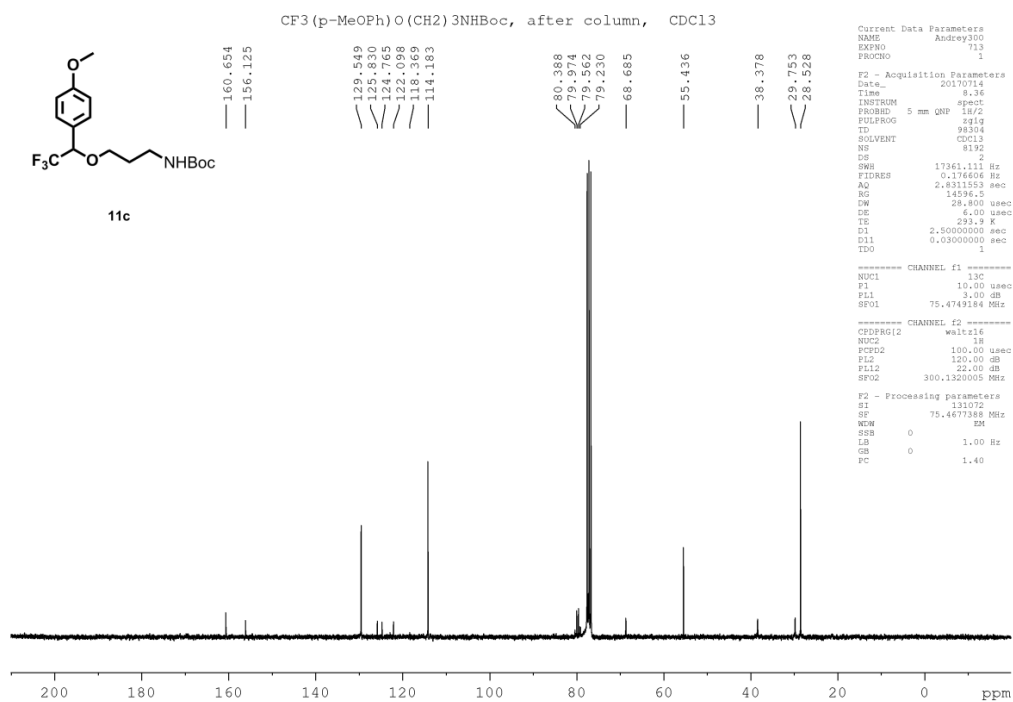

Supplementary figure 155.  $^{13}\text{C}$  NMR spectra of **11c** in  $\text{CDCl}_3$

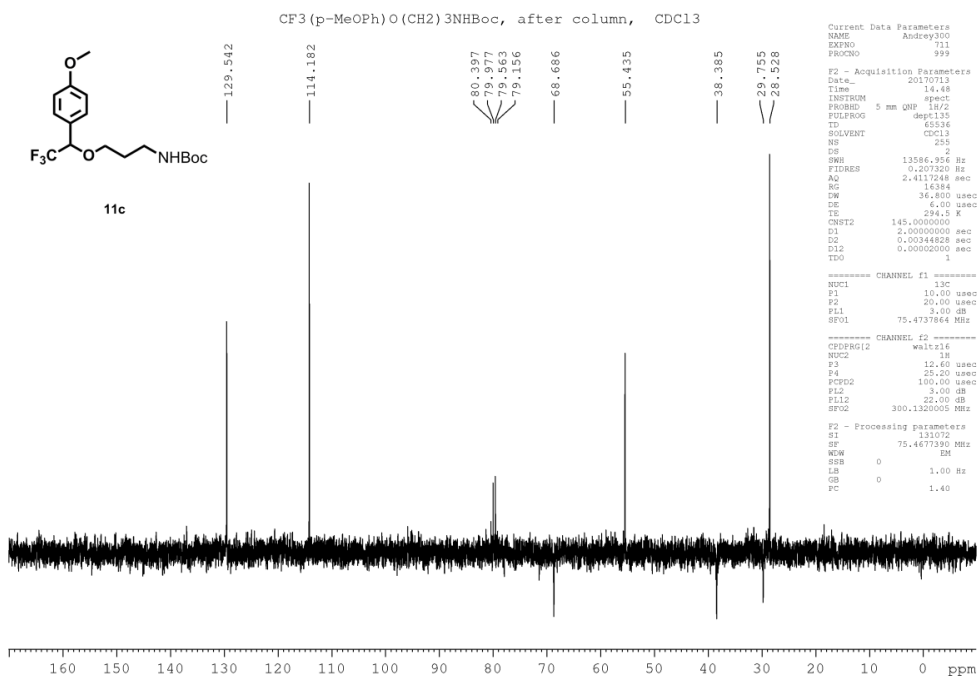

Supplementary figure 156. DEPT-135 NMR spectra of **11c** in  $\text{CDCl}_3$

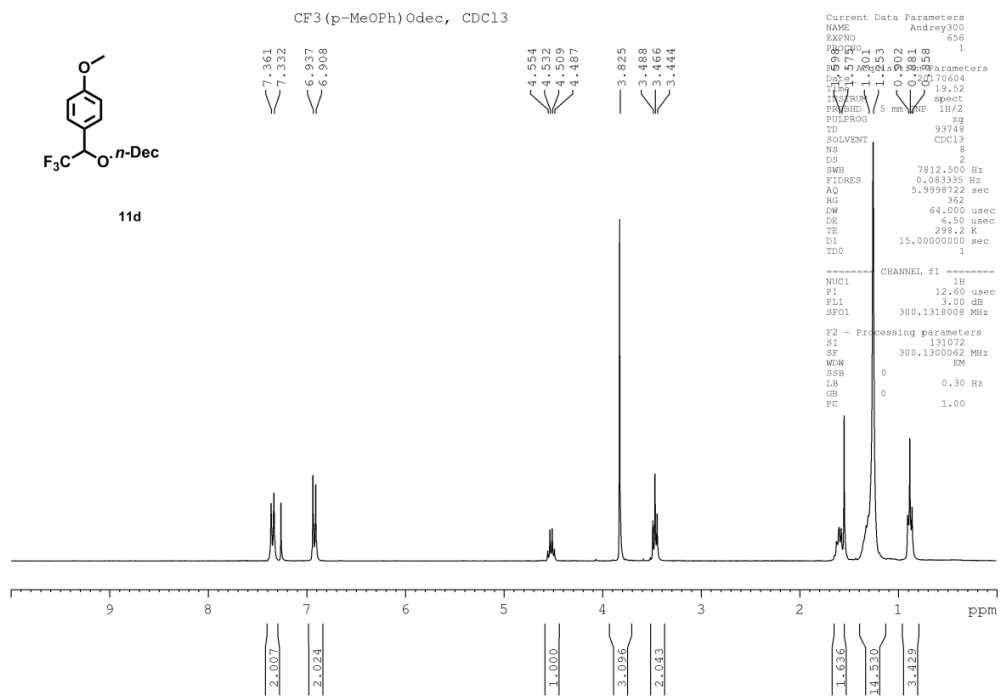

Supplementary figure 157.  $^1\text{H}$  NMR spectra of **11d** in  $\text{CDCl}_3$

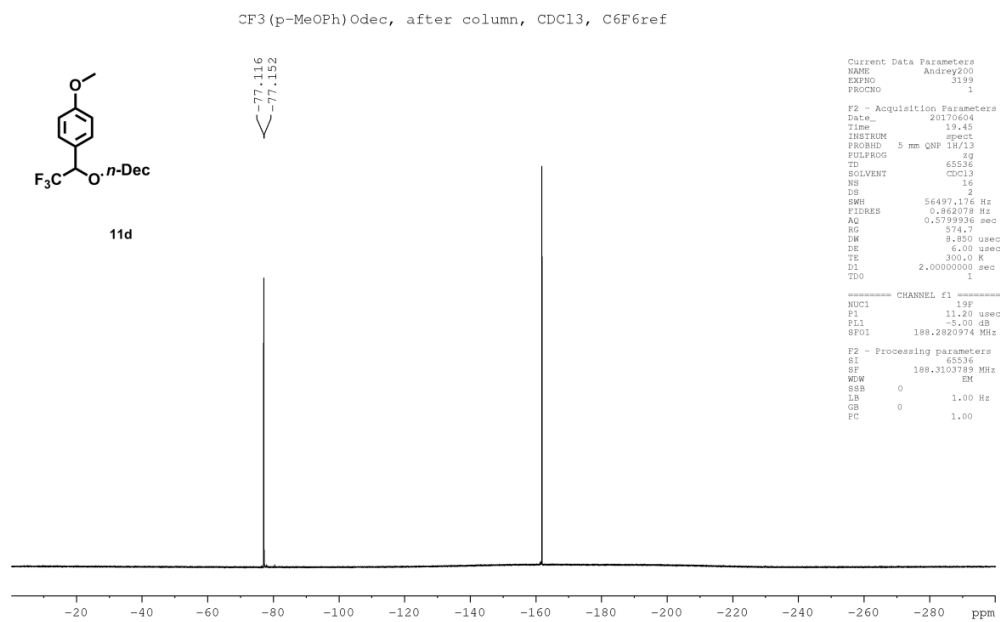

Supplementary figure 158.  $^{19}\text{F}$  NMR spectra of **11d** in  $\text{CDCl}_3$

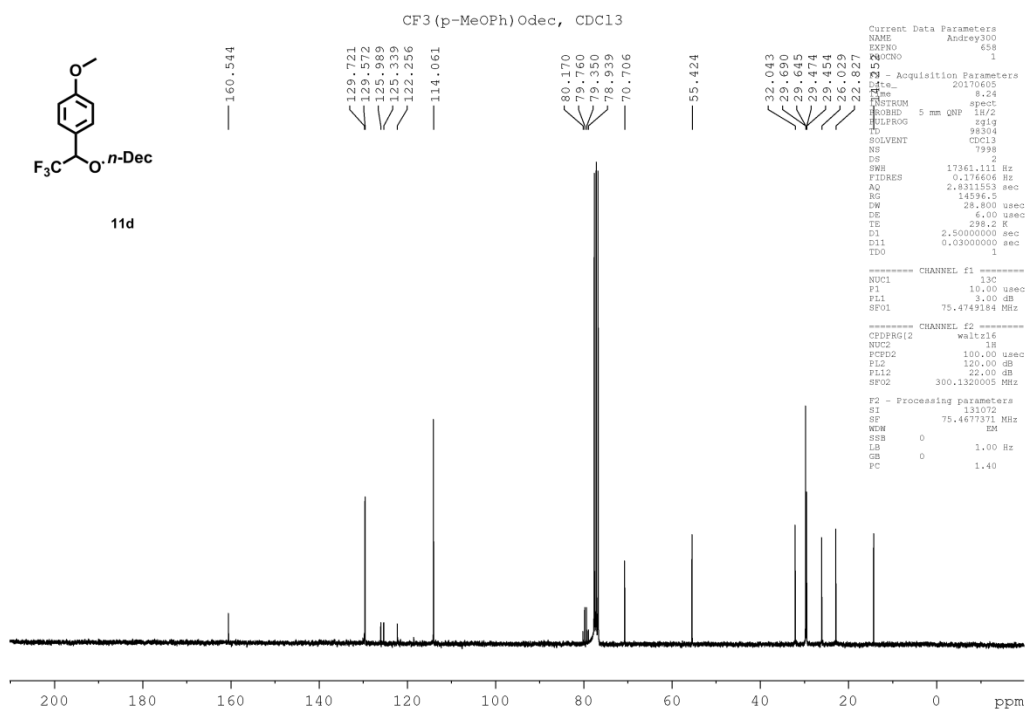

Supplementary figure 159. <sup>13</sup>C NMR spectra of **11d** in CDCl<sub>3</sub>

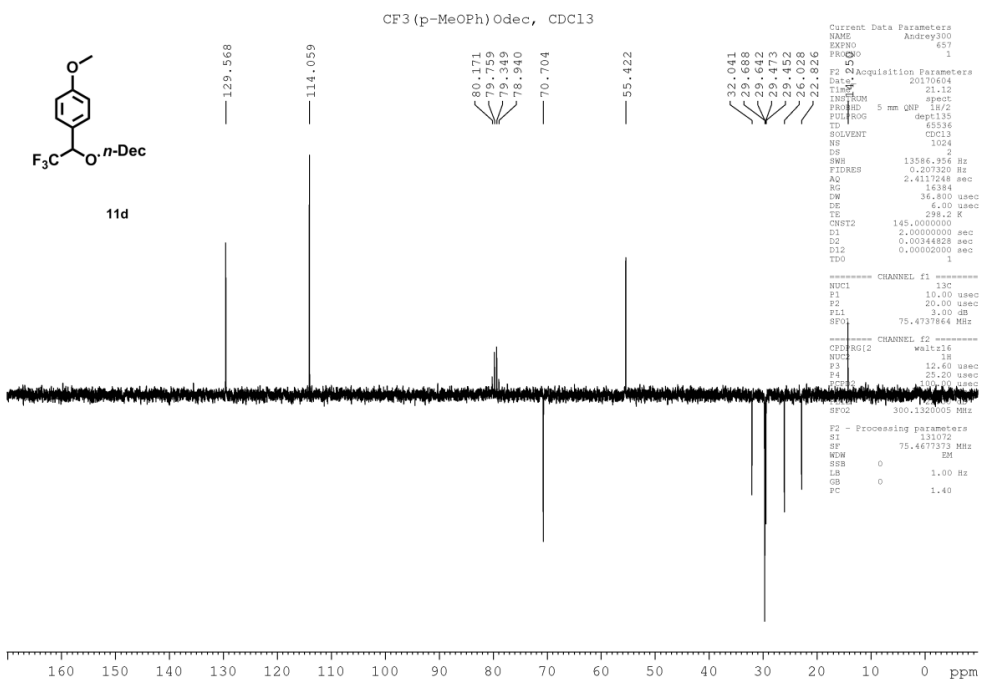

Supplementary figure 160. DEPT-135 NMR spectra of **11d** in CDCl<sub>3</sub>

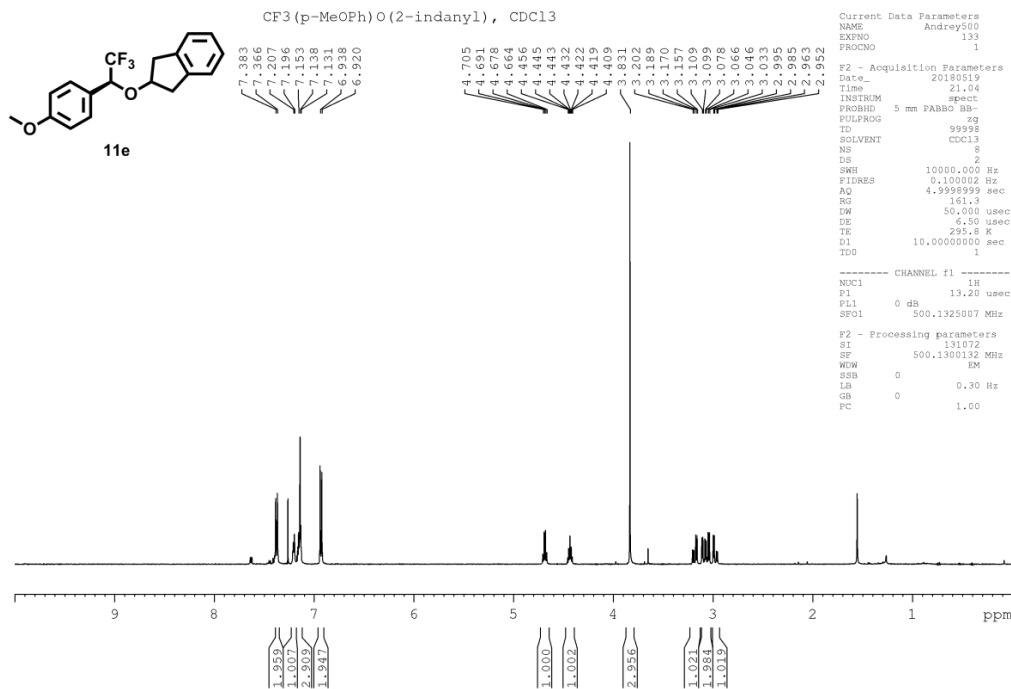

Supplementary figure 161. <sup>1</sup>H NMR spectra of **11e** in CDCl<sub>3</sub>

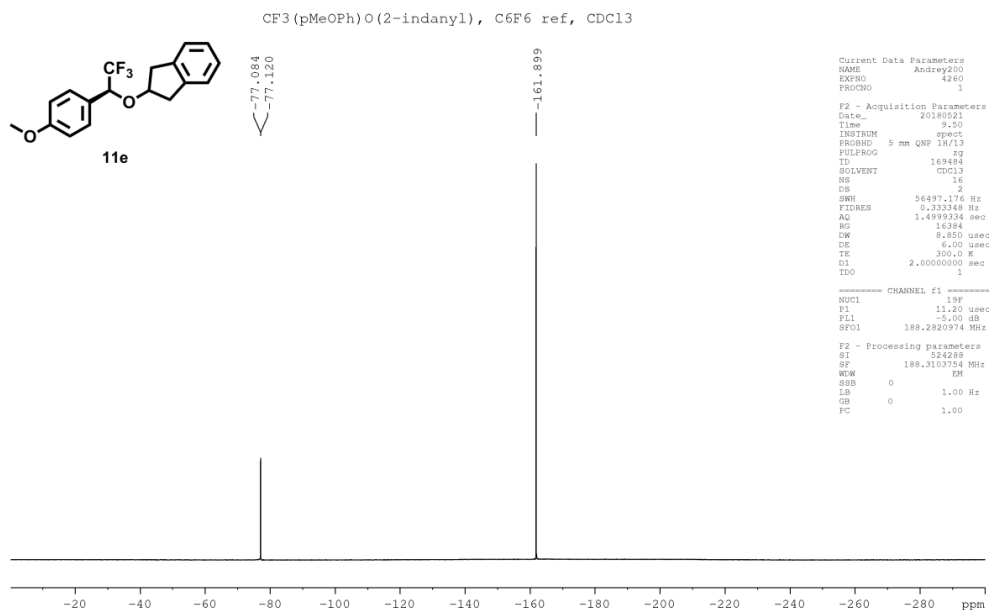

Supplementary figure 162. <sup>19</sup>F NMR spectra of **11e** in CDCl<sub>3</sub>

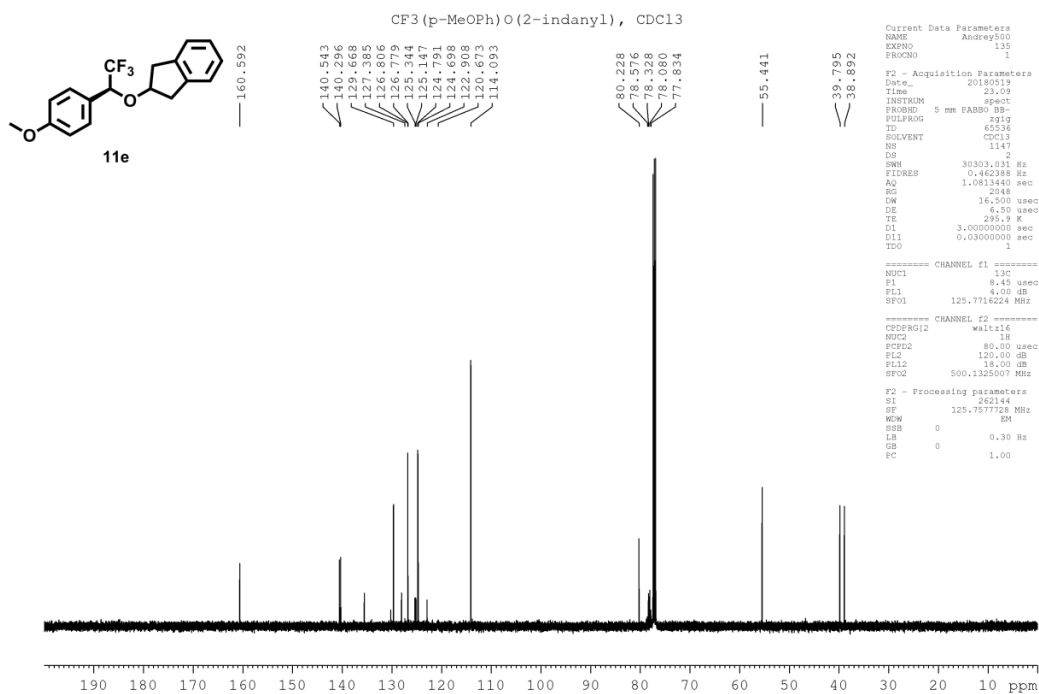

Supplementary figure 163. <sup>13</sup>C NMR spectra of **11e** in CDCl<sub>3</sub>

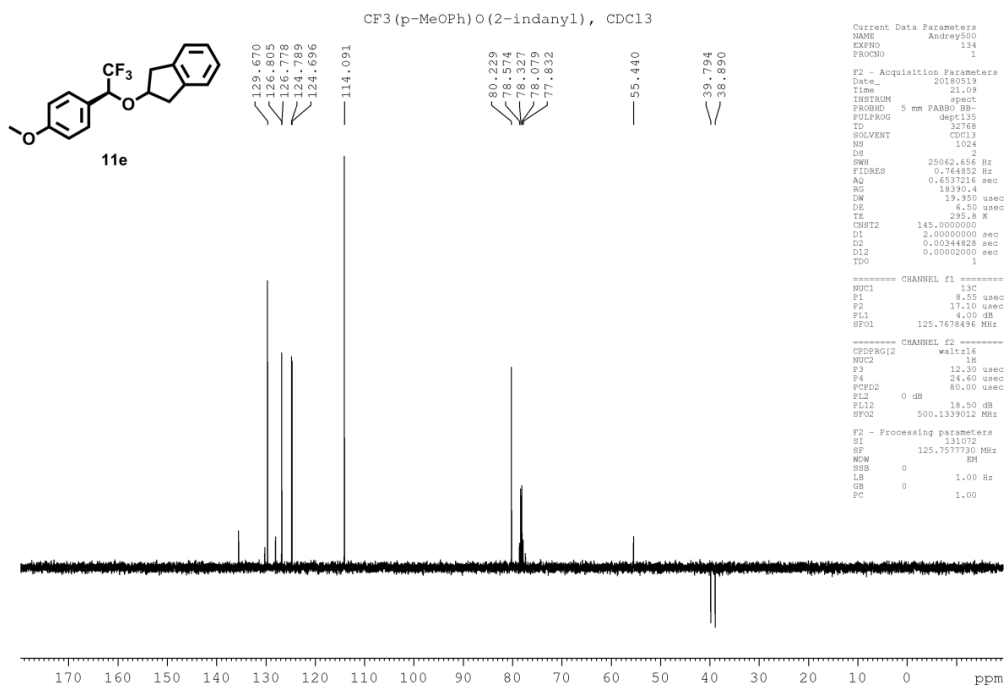

Supplementary figure 164. DEPT-135 NMR spectra of **11e** in CDCl<sub>3</sub>

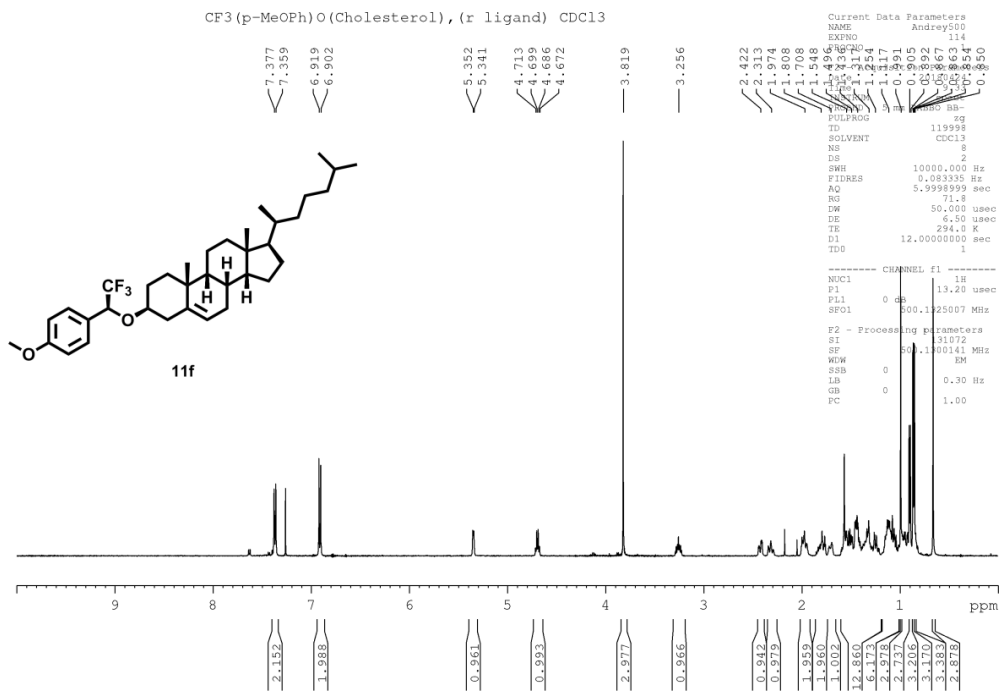

Supplementary figure 165. <sup>1</sup>H NMR spectra of (S)-11f in CDCl<sub>3</sub>

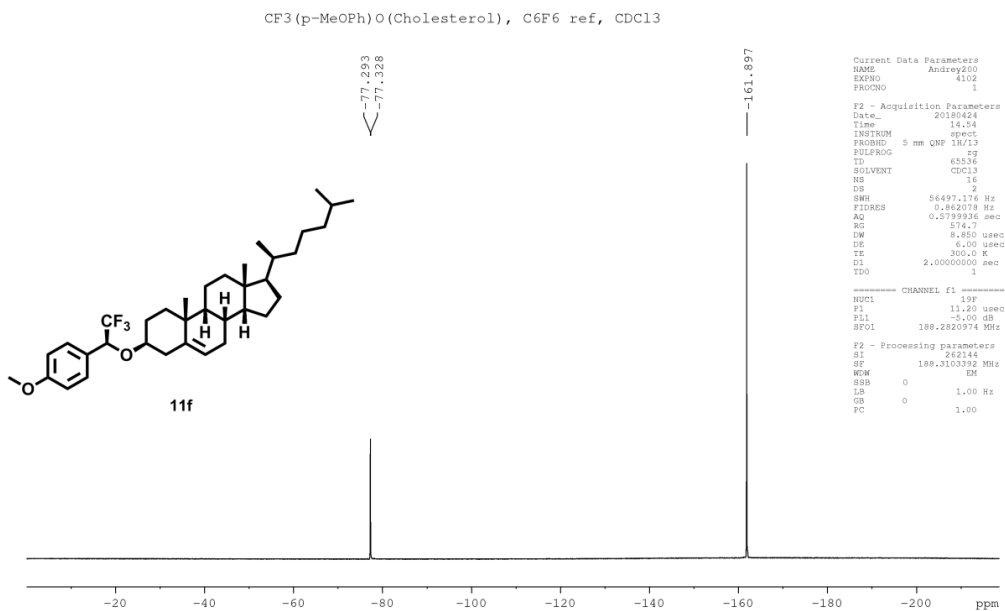

Supplementary figure 166. <sup>19</sup>F NMR spectra of (S)-11f in CDCl<sub>3</sub>

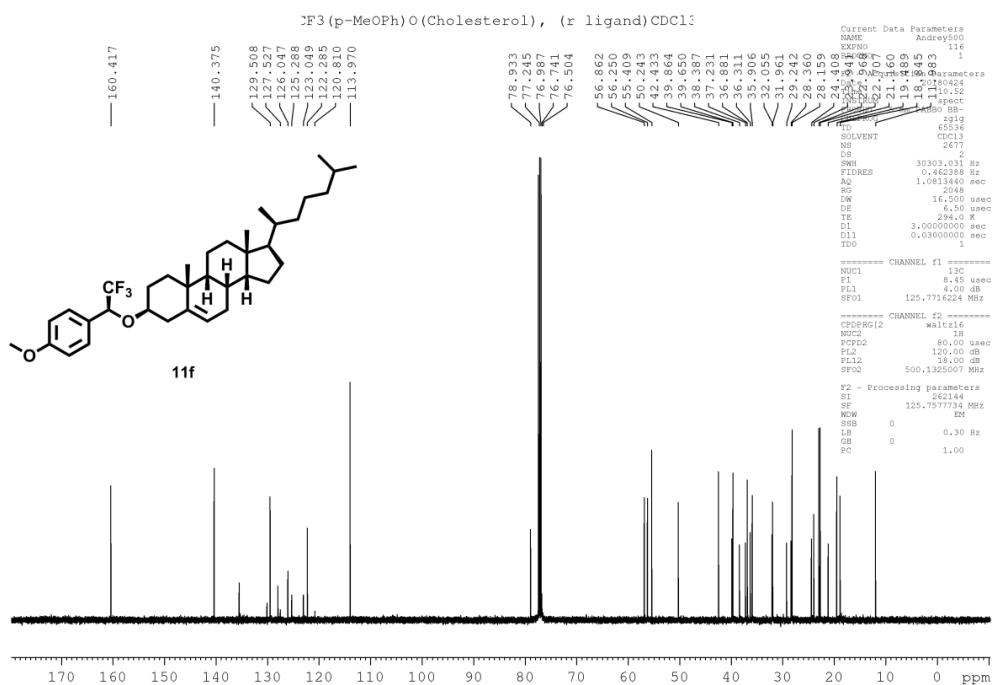

Supplementary figure 167. <sup>13</sup>C NMR spectra of (S)-11f in CDCl<sub>3</sub>

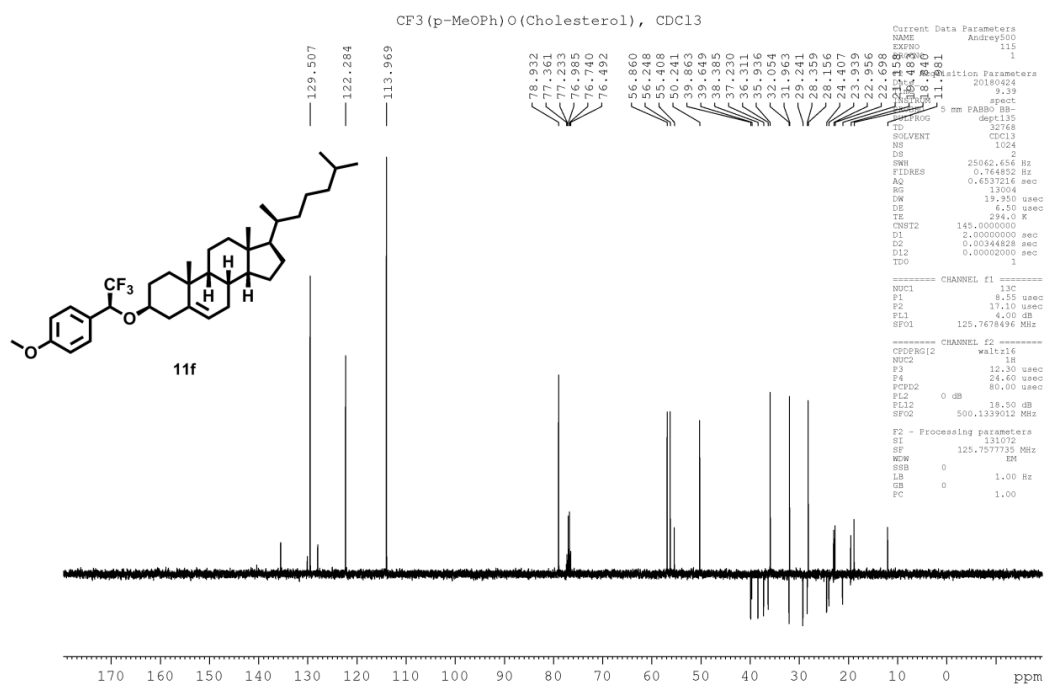

Supplementary figure 168. DEPR-135 NMR spectra of (S)-11f in CDCl<sub>3</sub>



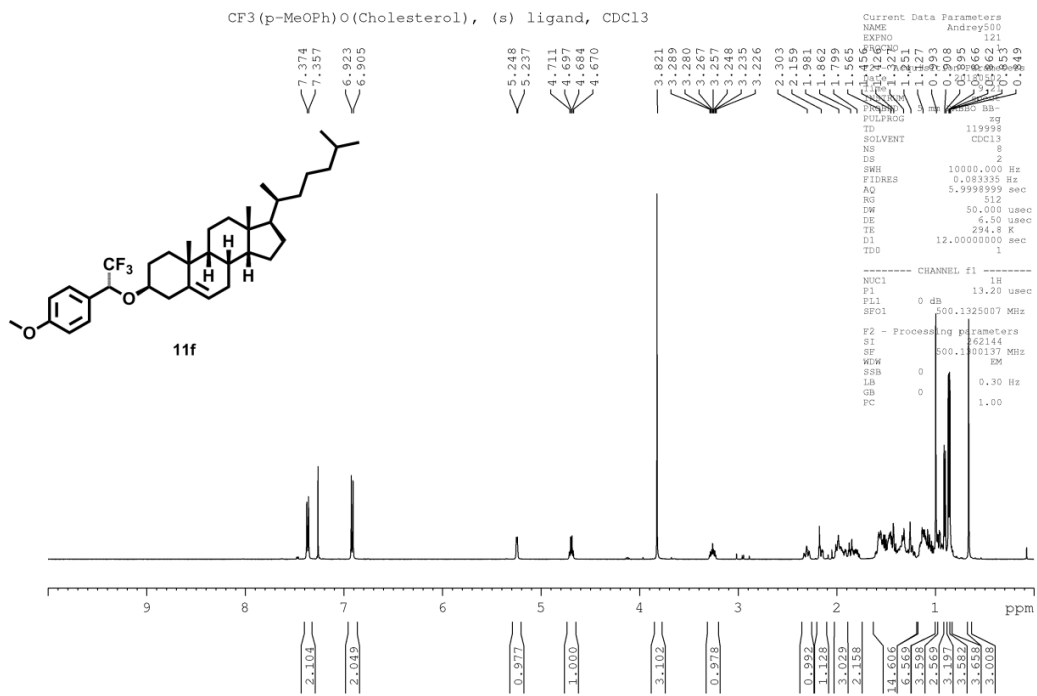

Supplementary figure 169. <sup>1</sup>H NMR spectra of (R)-11f in CDCl<sub>3</sub>

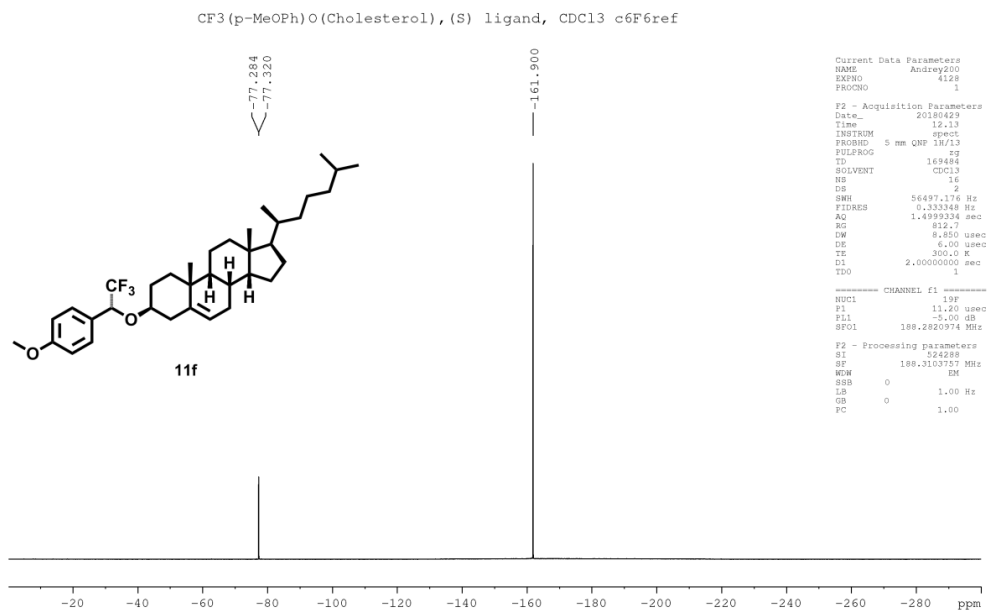

Supplementary figure 170. <sup>19</sup>F NMR spectra of (R)-11f in CDCl<sub>3</sub>

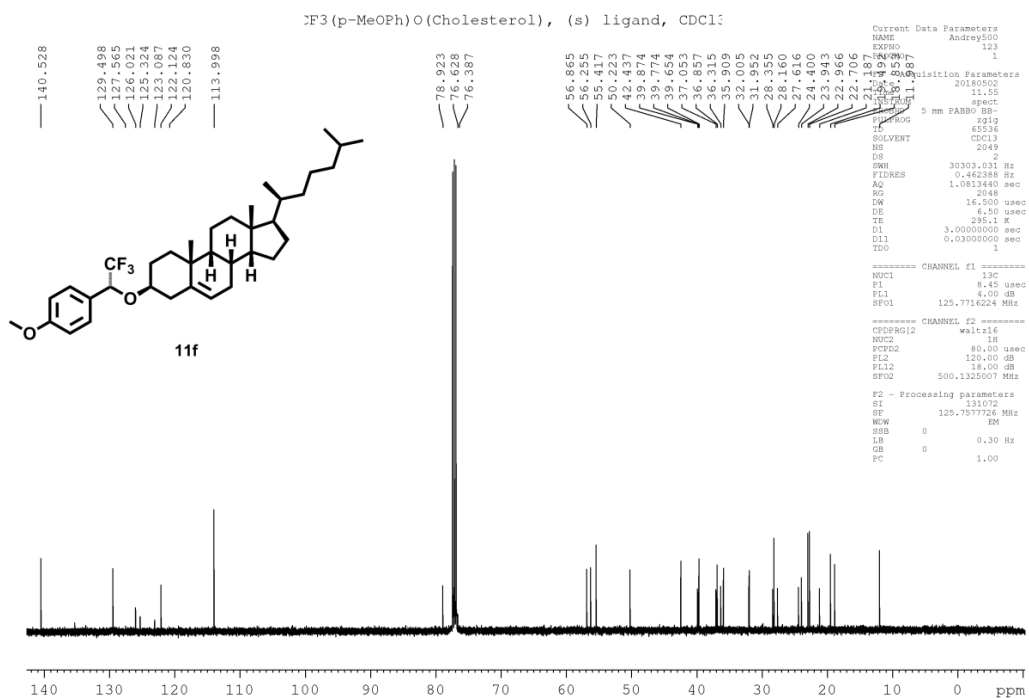

Supplementary figure 171. <sup>13</sup>C NMR spectra of (R)-11f in CDCl<sub>3</sub>

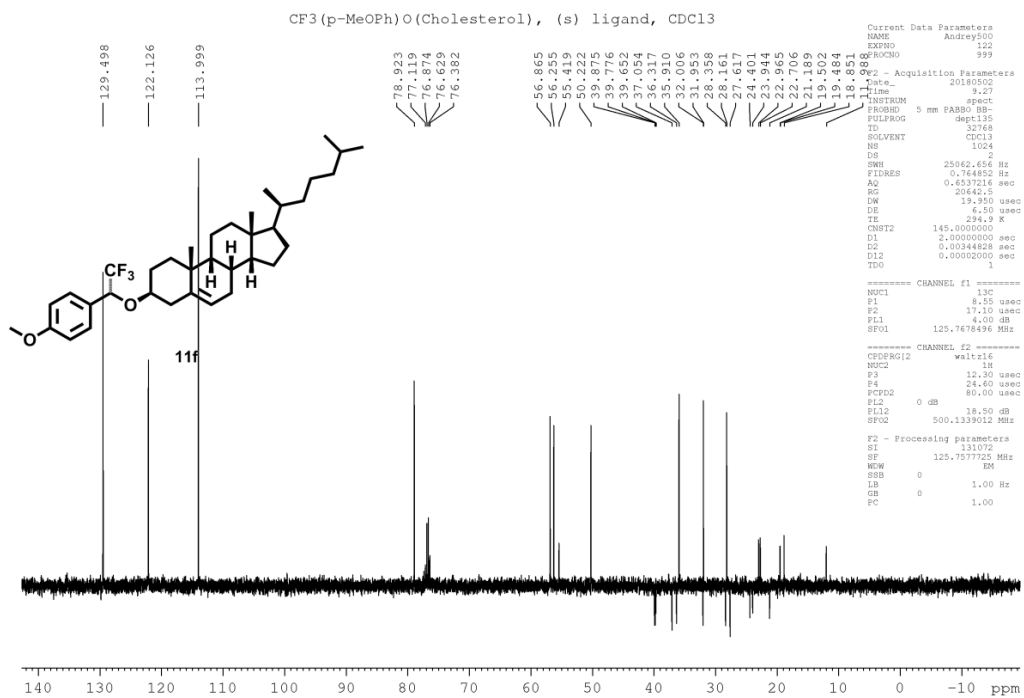

Supplementary figure 172. DEPT-135 NMR spectra of (R)-11f in CDCl<sub>3</sub>

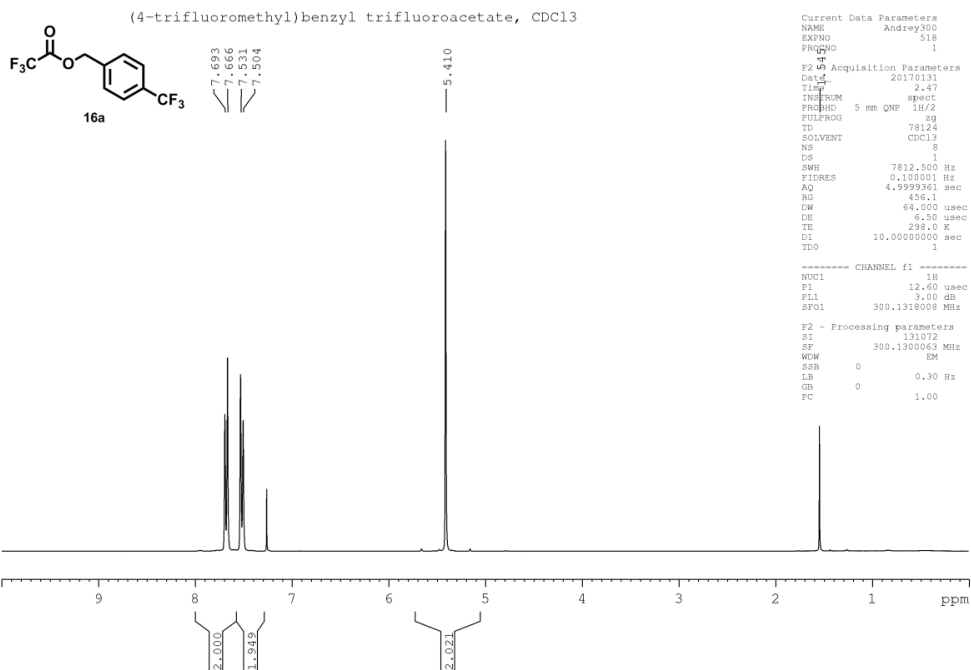

Supplementary figure 173. <sup>1</sup>H NMR spectra of 16a in CDCl<sub>3</sub>

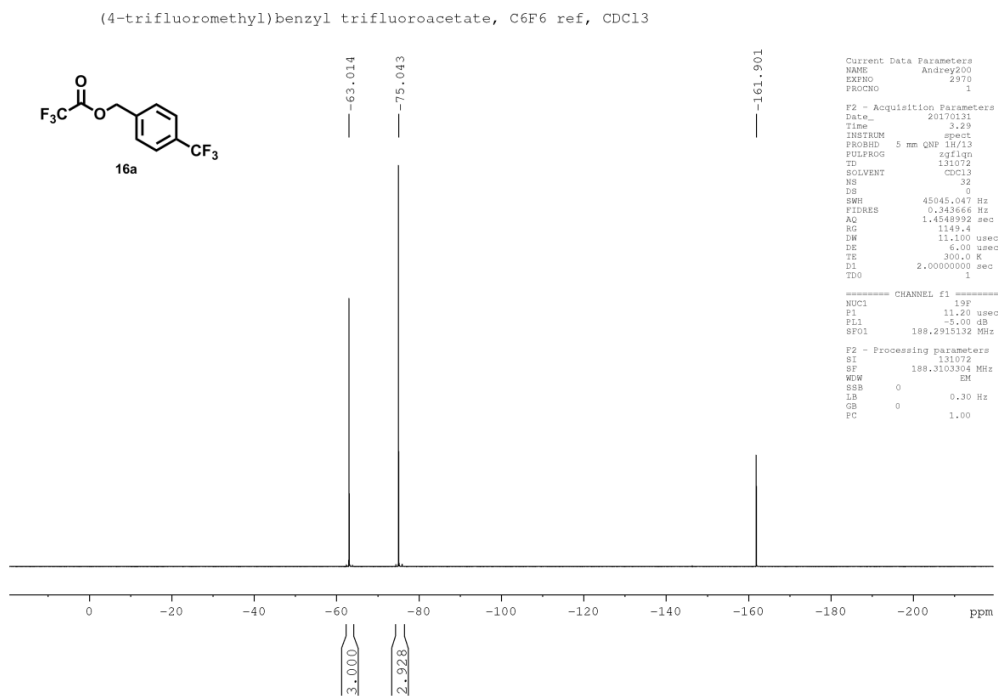

Supplementary figure 174. <sup>19</sup>F NMR spectra of 16a in CDCl<sub>3</sub>

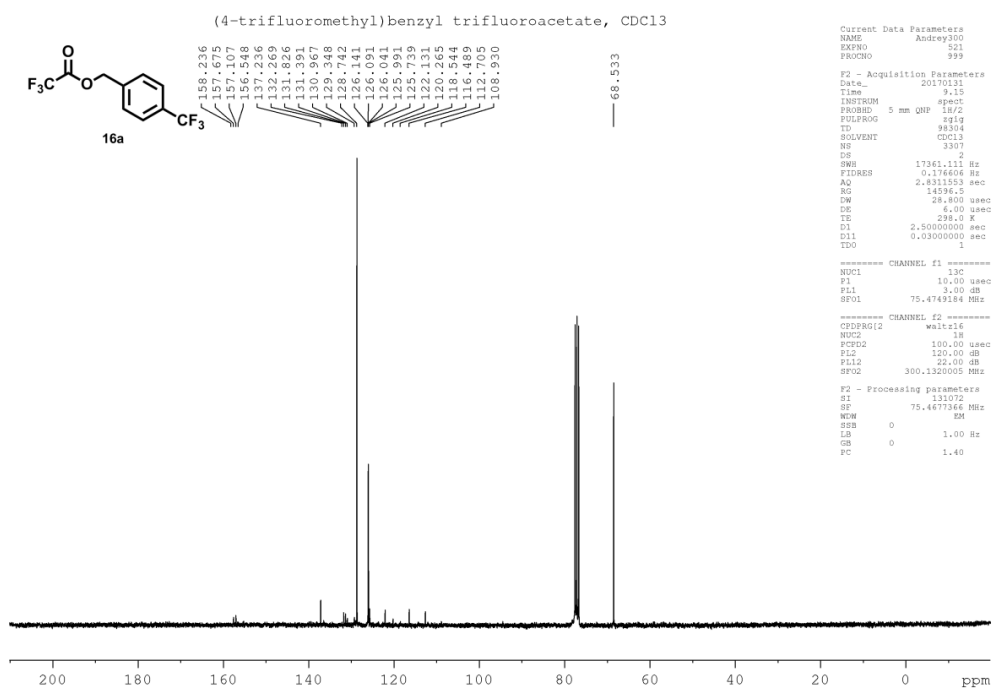

Supplementary figure 175. <sup>13</sup>C NMR spectra of 16a in CDCl<sub>3</sub>

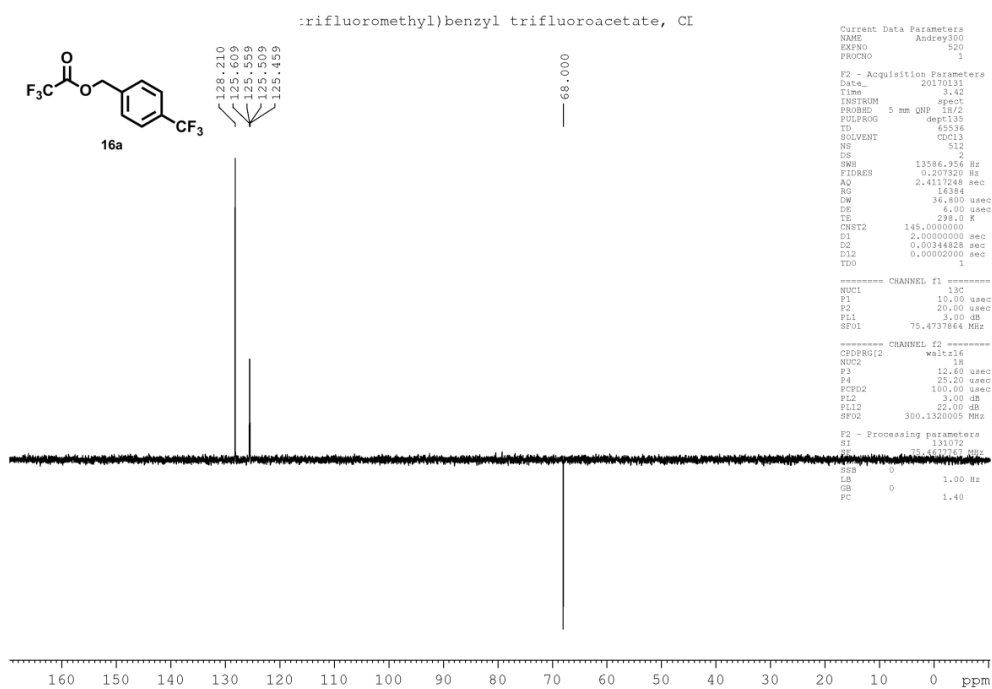

Supplementary figure 176. DEPT-135 NMR spectra of 16a in CDCl<sub>3</sub>

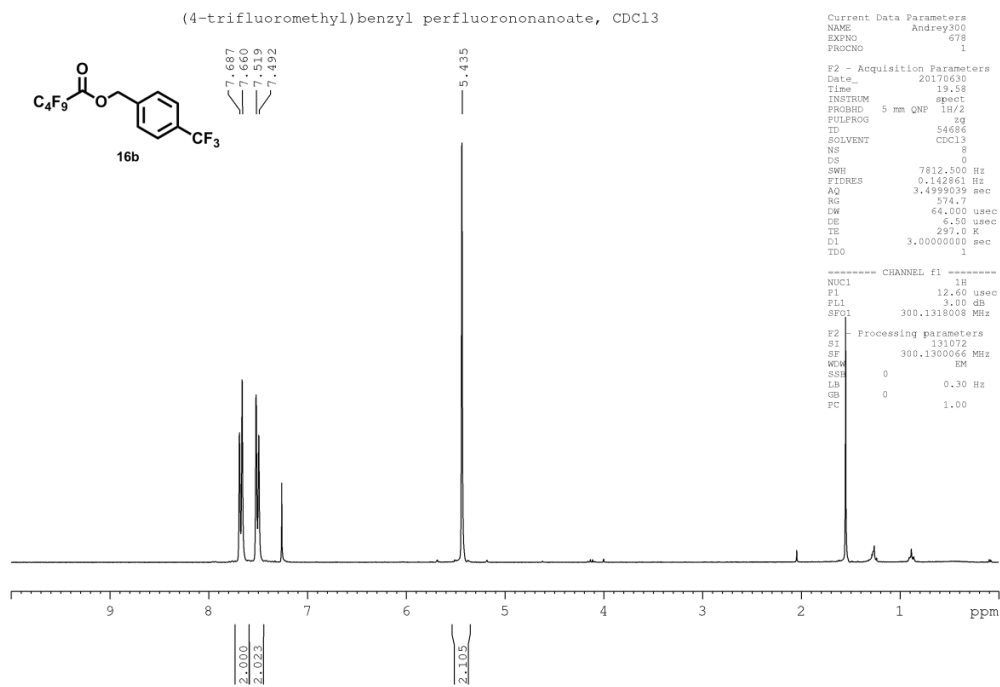

Supplementary figure 177. <sup>1</sup>H NMR spectra of **16b** in CDCl<sub>3</sub>

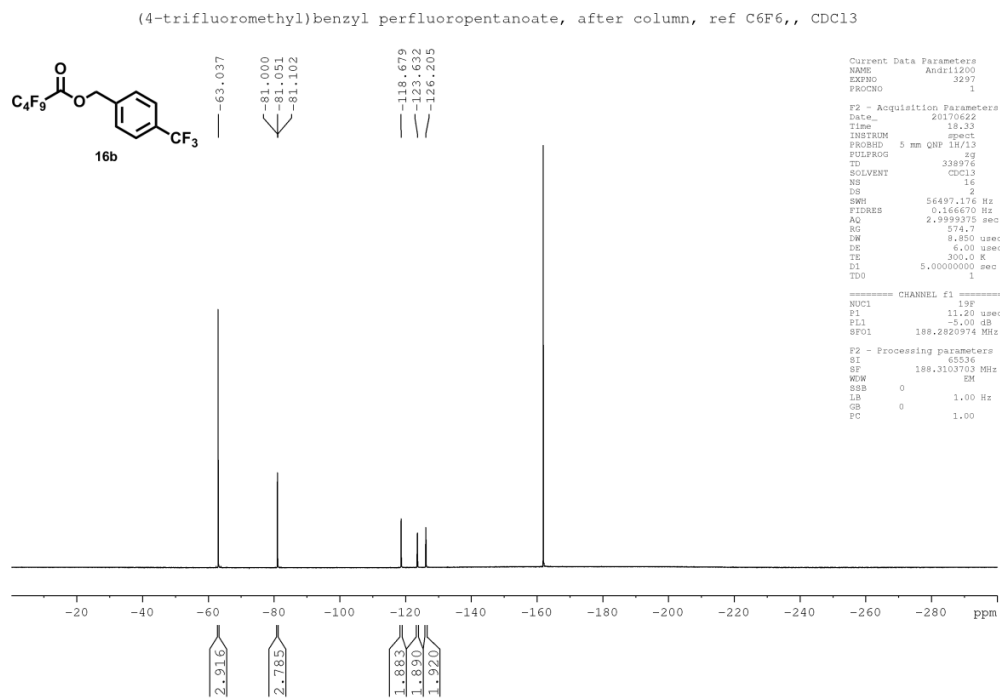

Supplementary figure 178. <sup>19</sup>F NMR spectra of **16b** in CDCl<sub>3</sub>

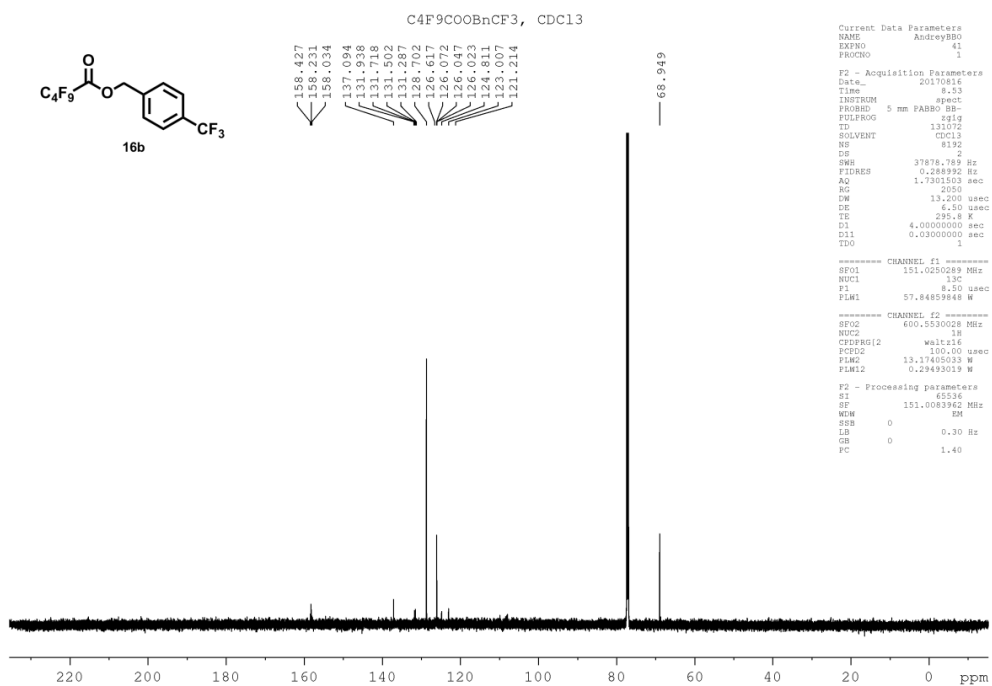

Supplementary figure 179. <sup>13</sup>C NMR spectra of **16b** in CDCl<sub>3</sub>

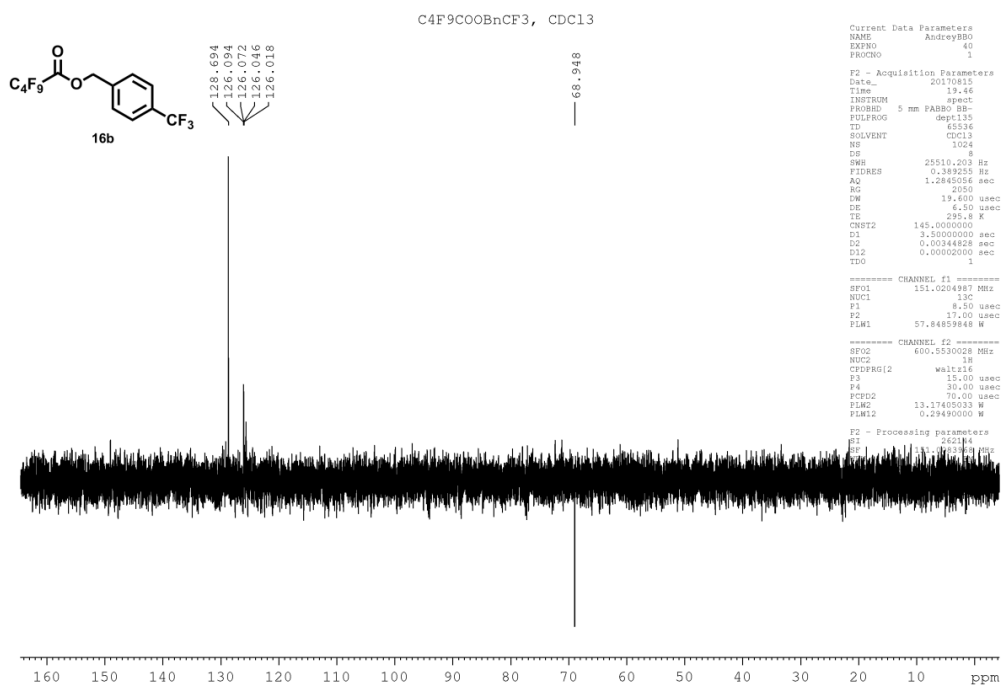

Supplementary figure 180. DEPT-135 NMR spectra of **16b** in CDCl<sub>3</sub>

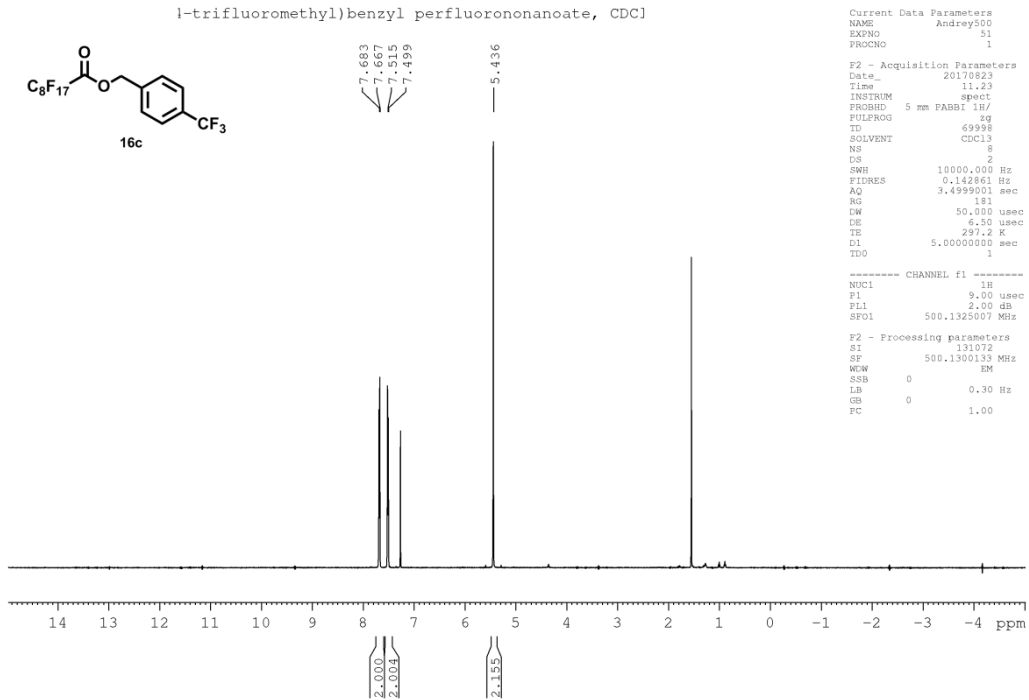

Supplementary figure 181.  $^1\text{H}$  NMR spectra of **16c** in  $\text{CDCl}_3$

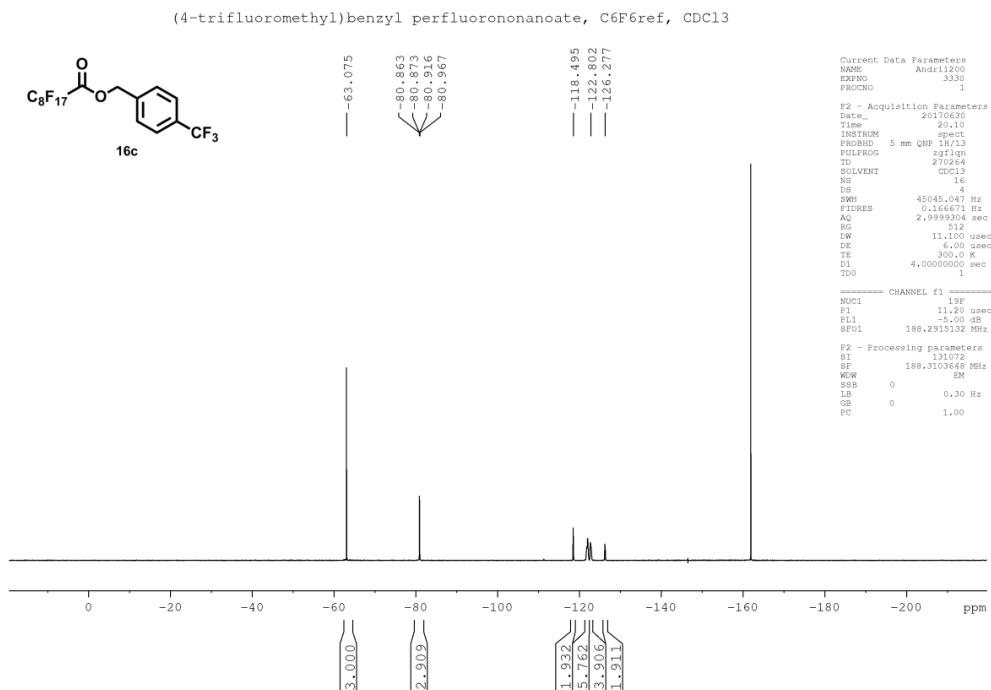

Supplementary figure 182.  $^{19}\text{F}$  NMR spectra of **16c** in  $\text{CDCl}_3$

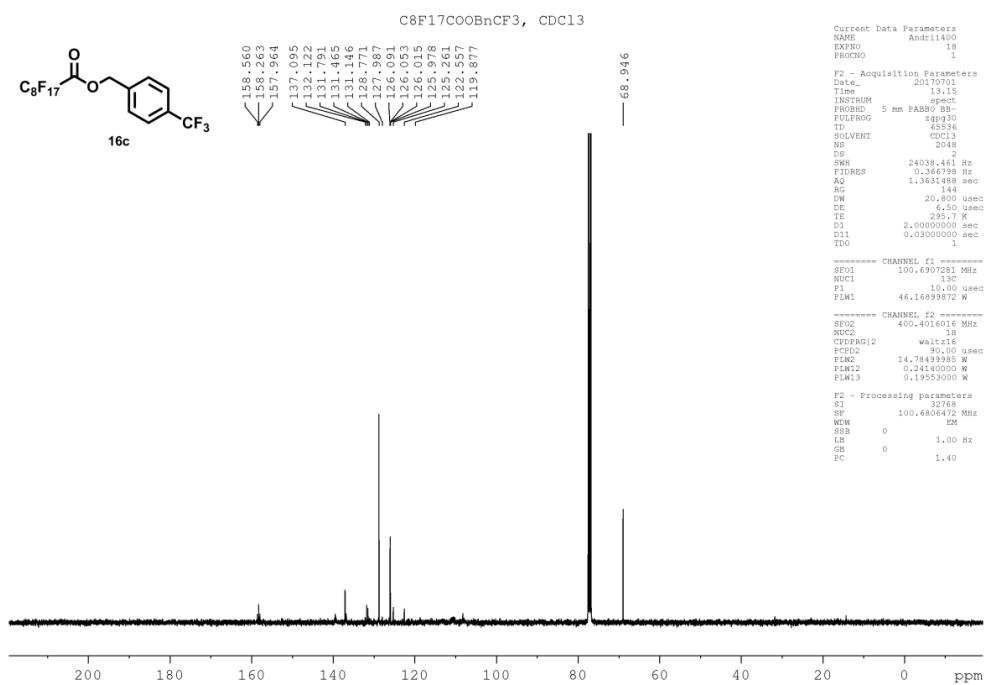

Supplementary figure 183. <sup>13</sup>C NMR spectra of **16c** in CDCl<sub>3</sub>

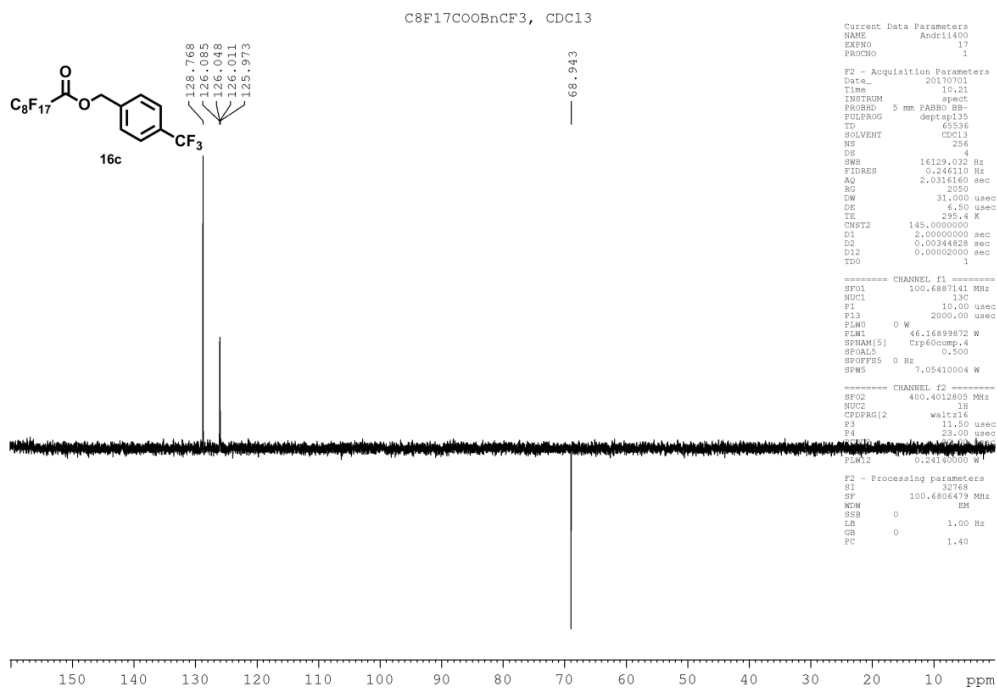

Supplementary figure 184. DEPT-135 NMR spectra of **16c** in CDCl<sub>3</sub>



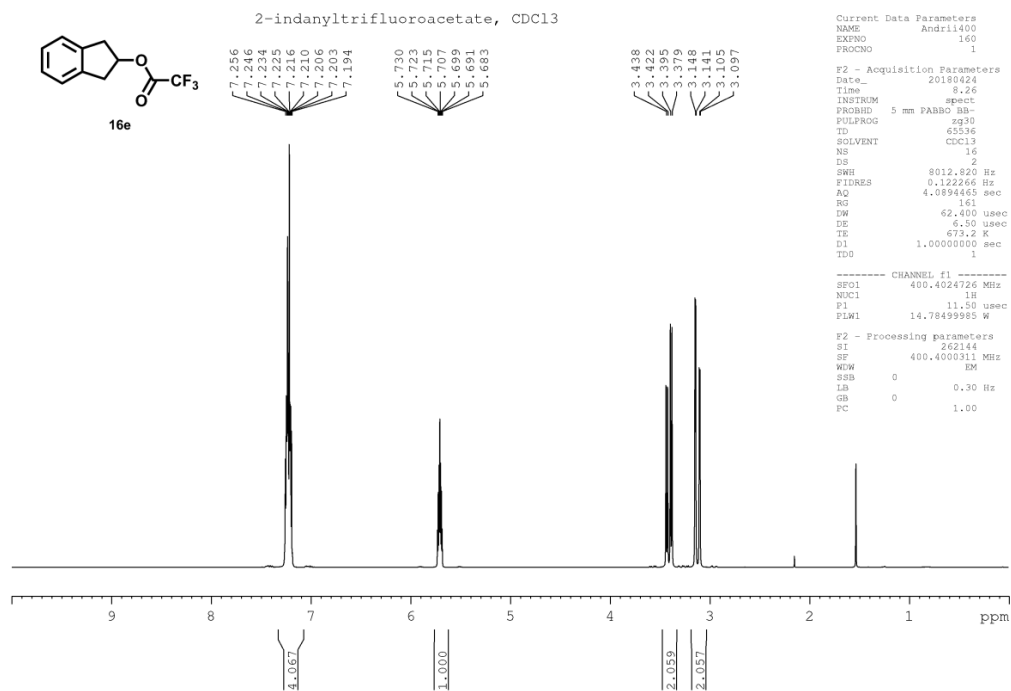

Supplementary figure 185. <sup>1</sup>H NMR spectra of 16e in CDCl<sub>3</sub>

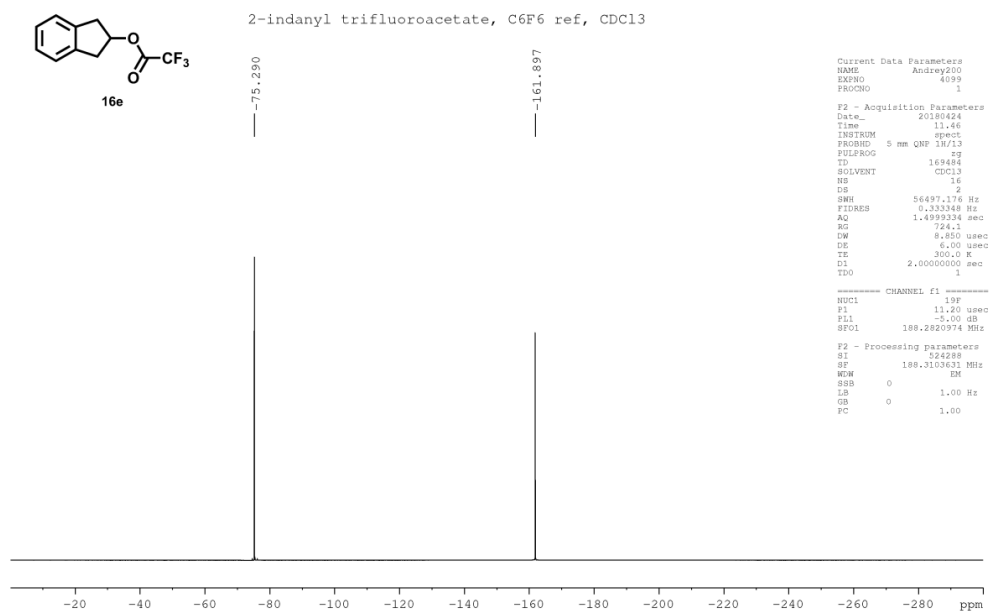

Supplementary figure 186. <sup>19</sup>F NMR spectra of 16e in CDCl<sub>3</sub>

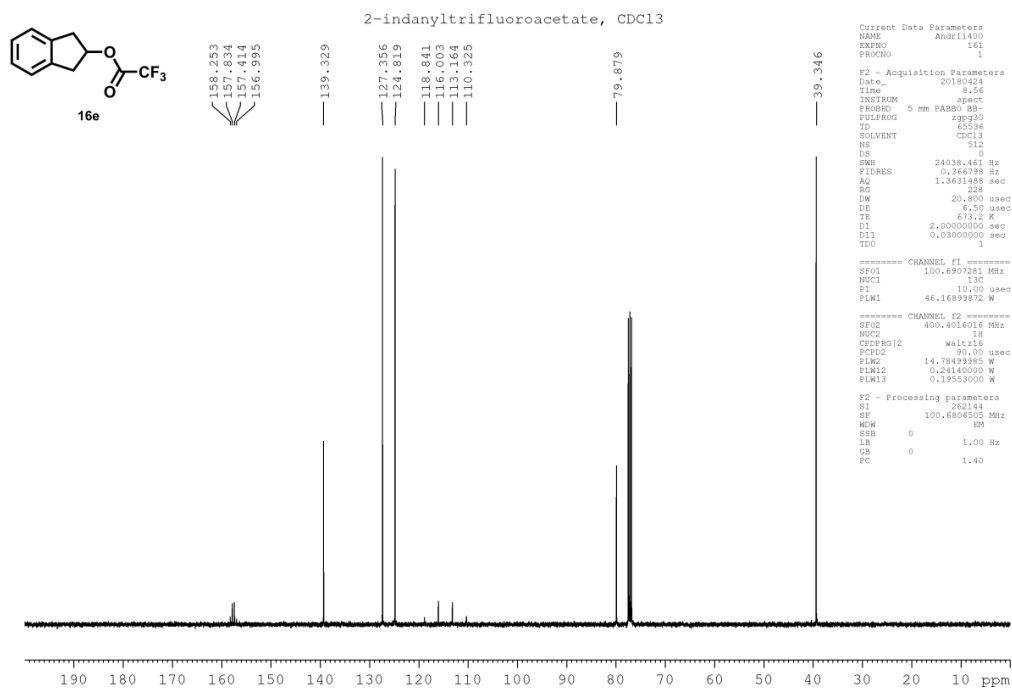

Supplementary figure 187. <sup>13</sup>C NMR spectra of 16e in CDCl<sub>3</sub>

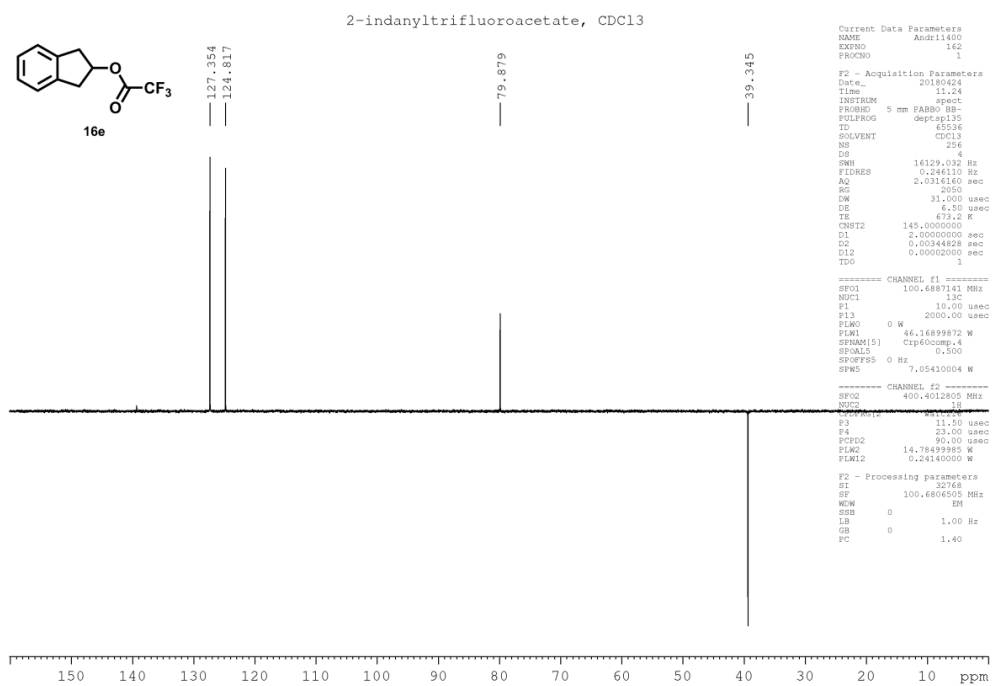

Supplementary figure 188. DEPT-135 NMR spectra of 16e in CDCl<sub>3</sub>

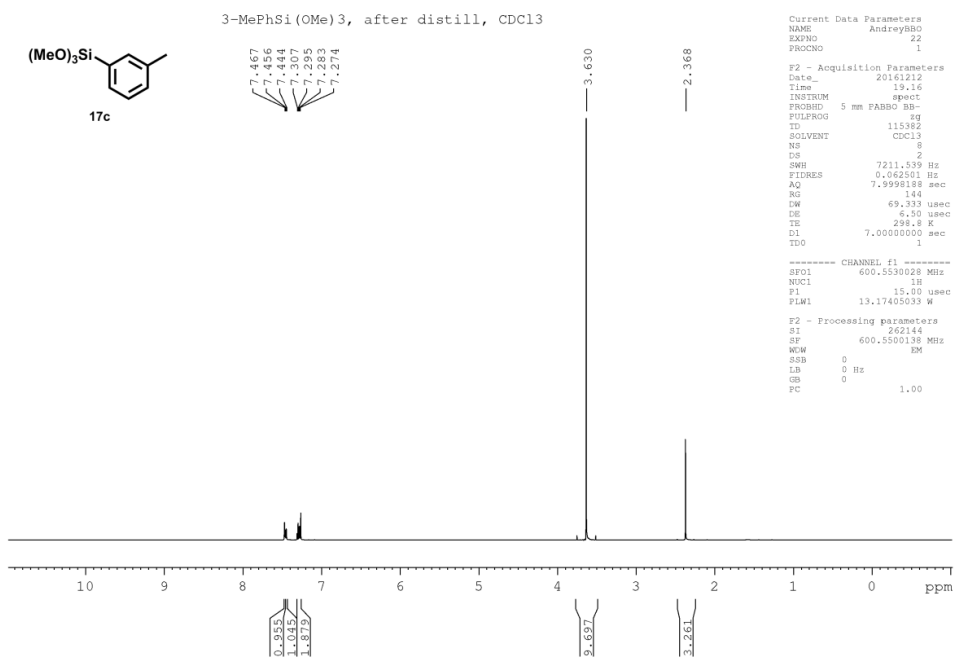

Supplementary figure 189. <sup>1</sup>H NMR spectra of 17c in CDCl<sub>3</sub>

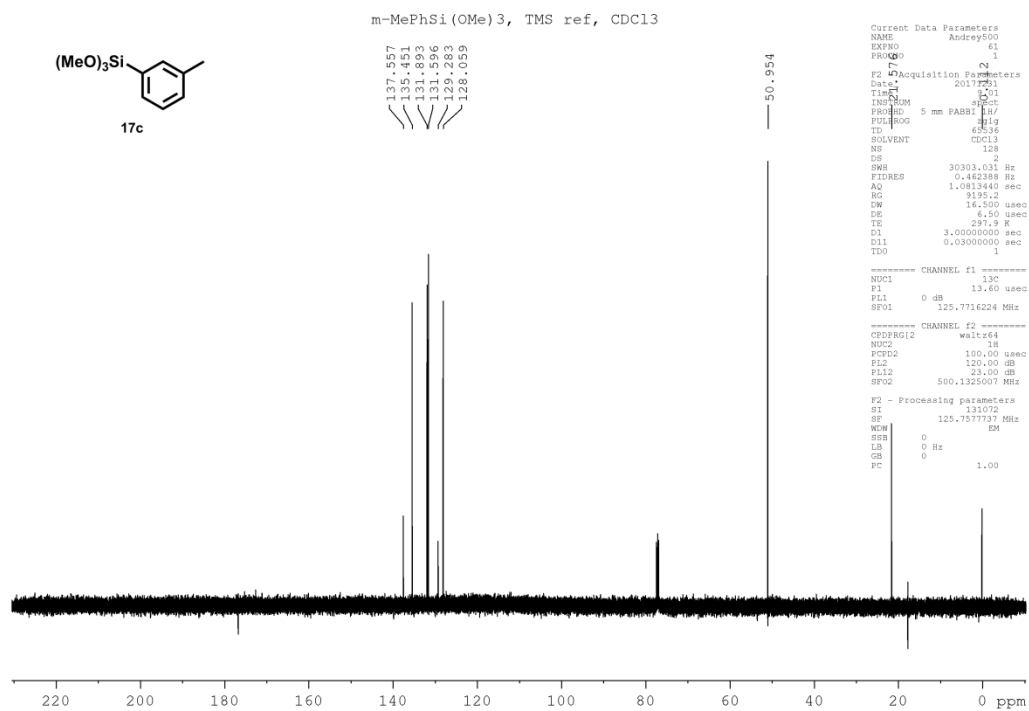

Supplementary figure 190. <sup>13</sup>C NMR spectra of 17c in CDCl<sub>3</sub>

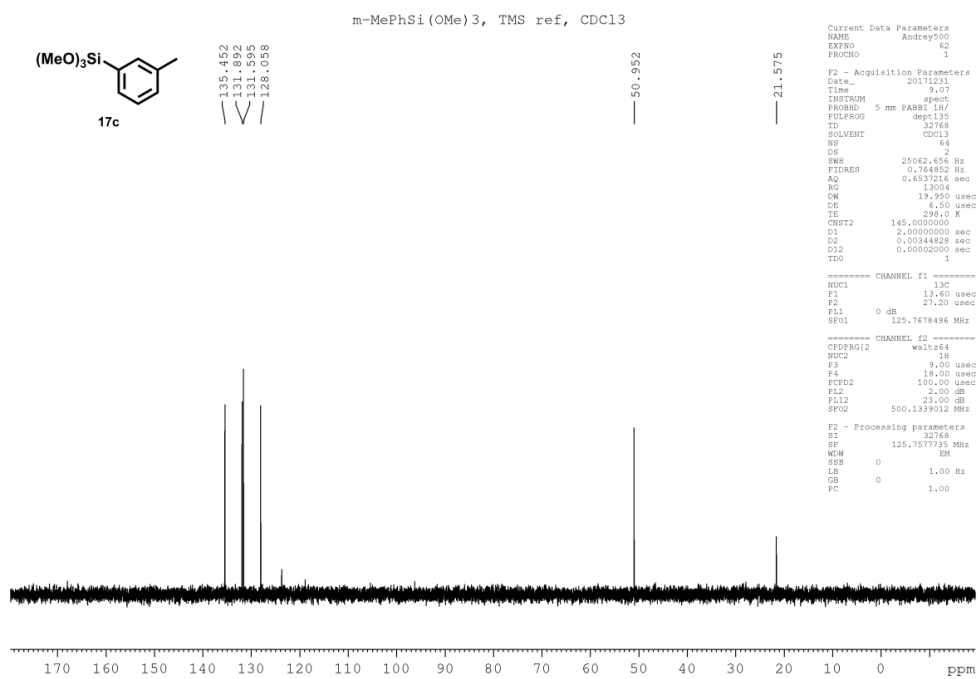

Supplementary figure 191. DEPT-135 NMR spectra of **17c** in CDCl<sub>3</sub>

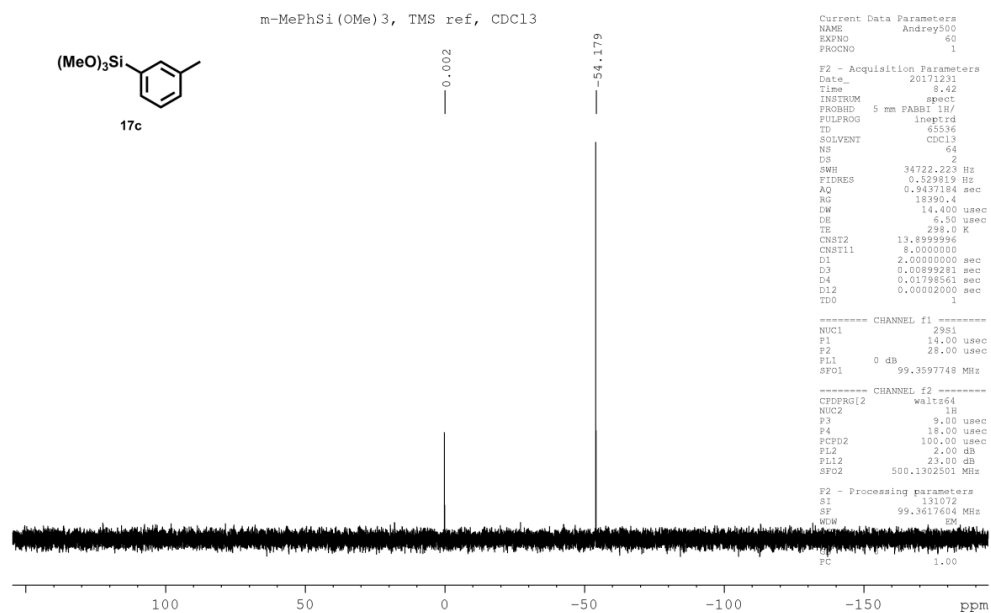

Supplementary figure 192. <sup>29</sup>Si NMR spectra of **17c** in CDCl<sub>3</sub>

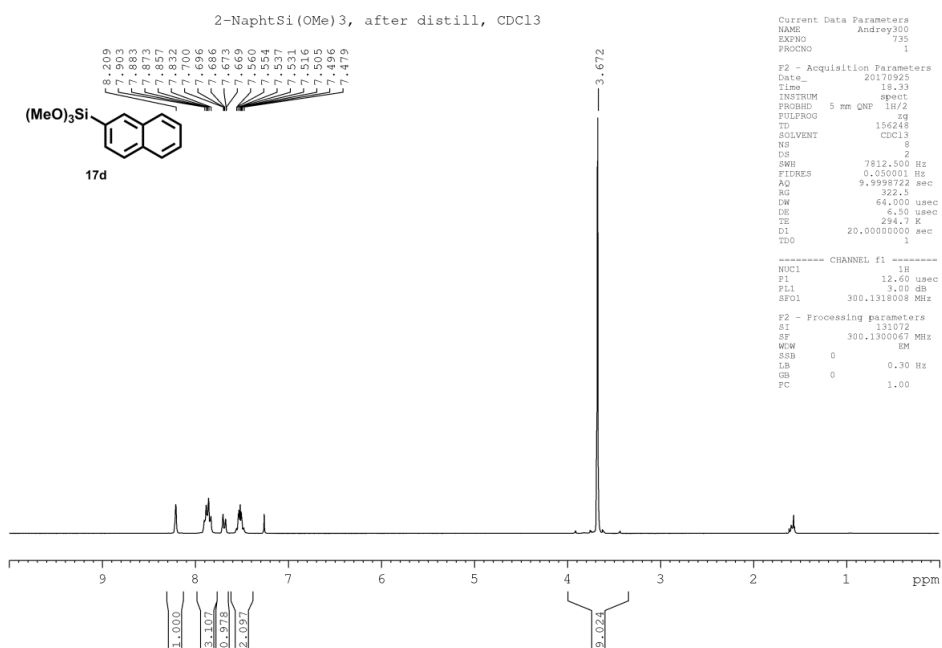

Supplementary figure 193. <sup>1</sup>H NMR spectra of **17d** in CDCl<sub>3</sub>

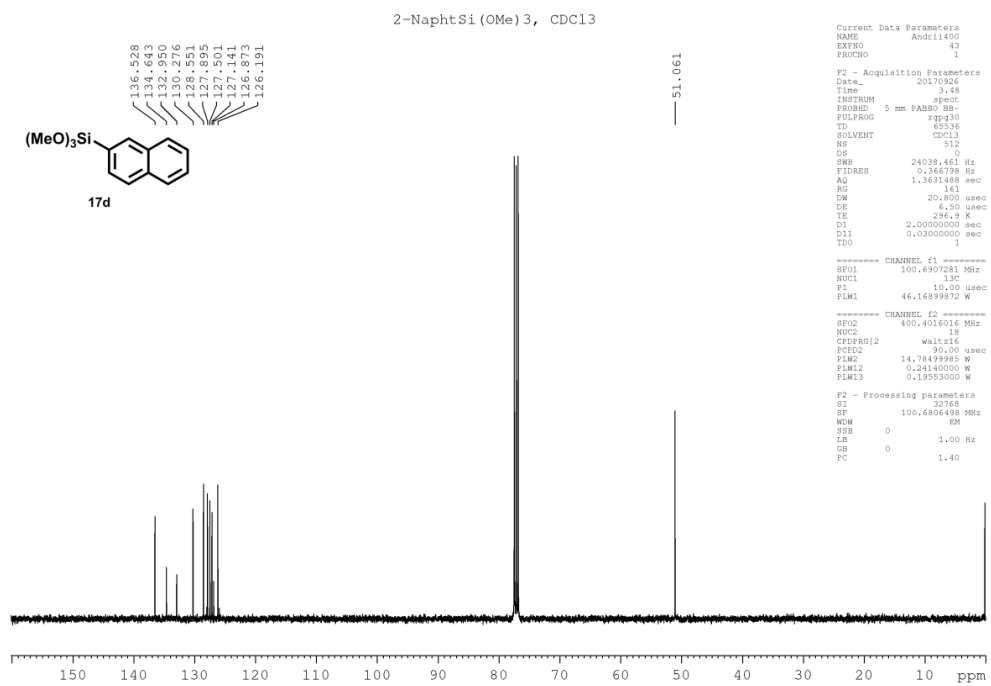

Supplementary figure 194. <sup>13</sup>C NMR spectra of **17d** in CDCl<sub>3</sub>

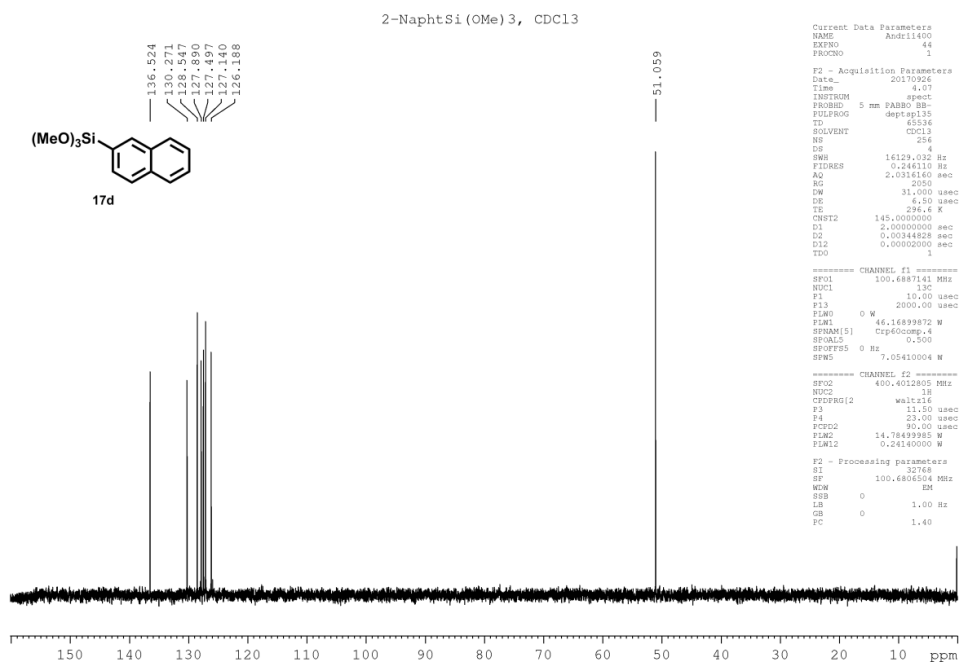

Supplementary figure 195. DEPT-135 NMR spectra of **17d** in CDCl<sub>3</sub>

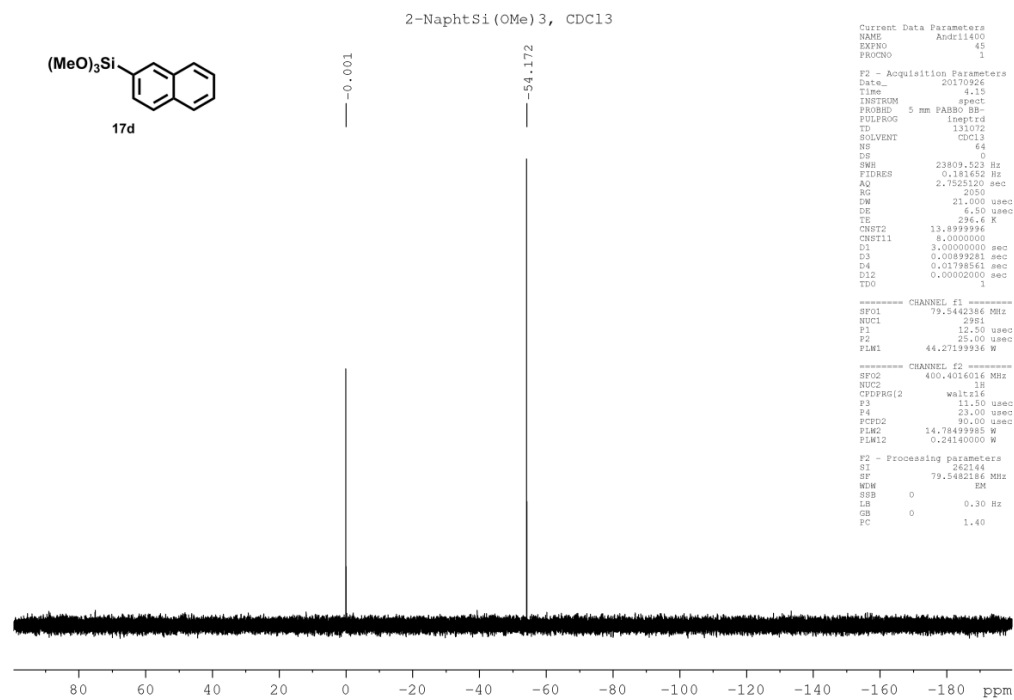

Supplementary figure 196. <sup>29</sup>Si NMR spectra of **17d** in CDCl<sub>3</sub>

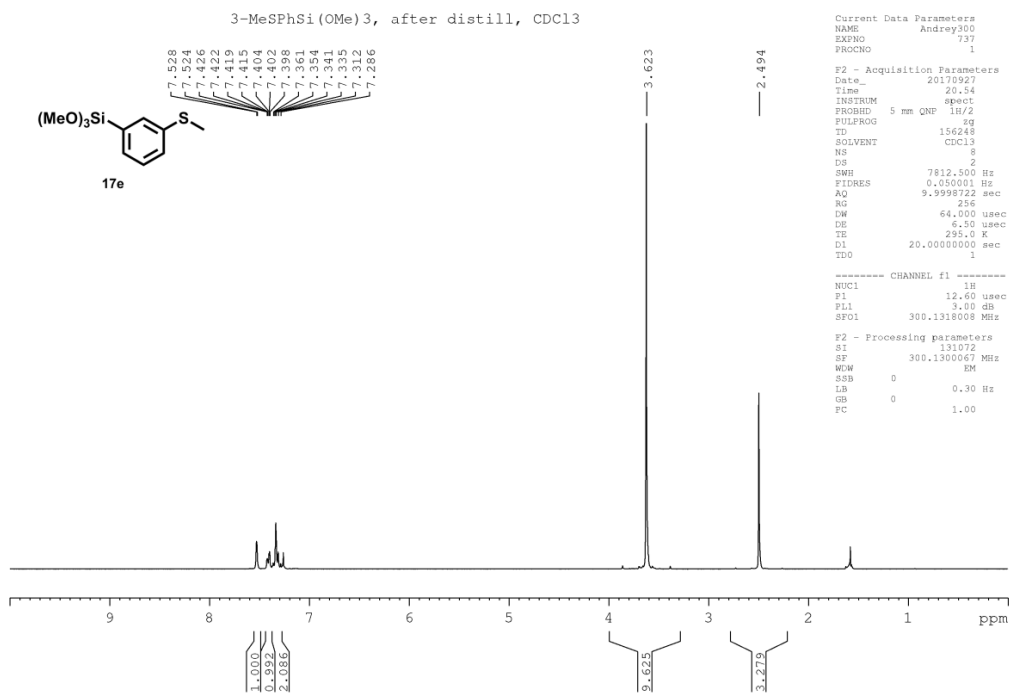

Supplementary figure 197. <sup>1</sup>H NMR spectra of **17e** in CDCl<sub>3</sub>

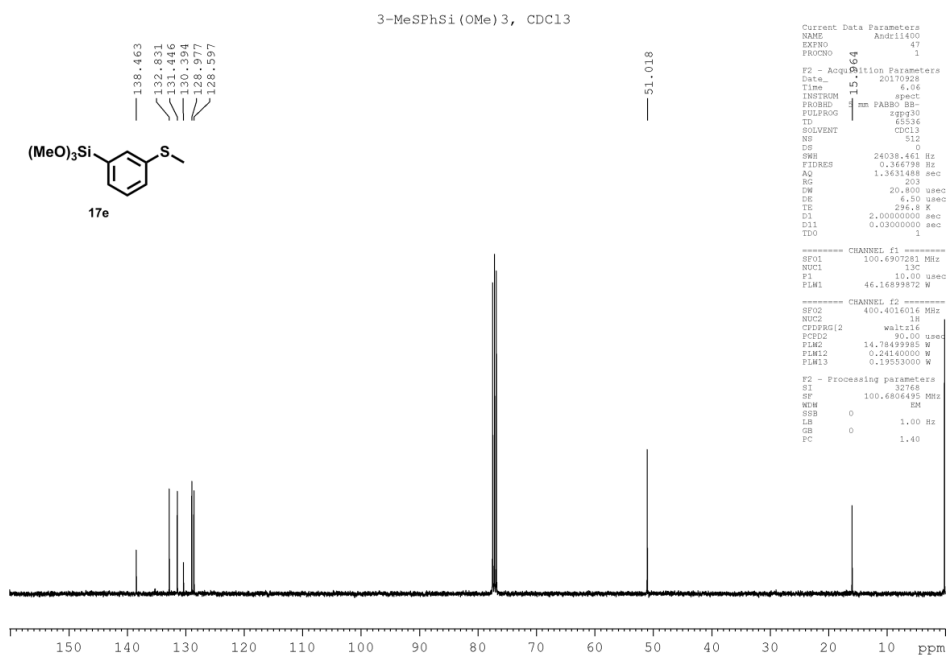

Supplementary figure 198. <sup>13</sup>C NMR spectra of **17e** in CDCl<sub>3</sub>

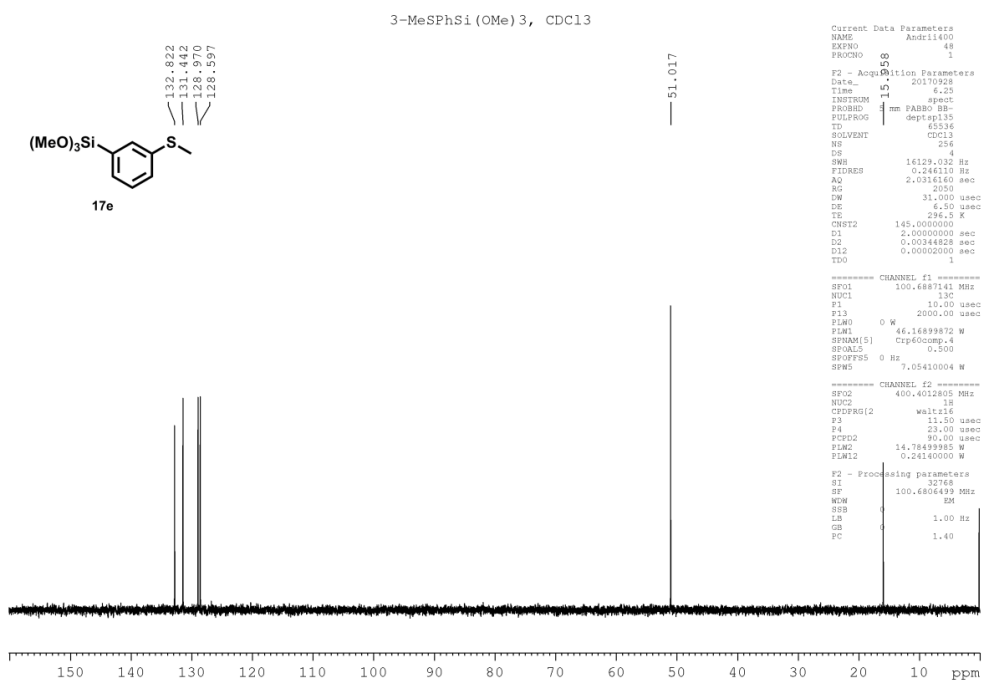

Supplementary figure 199. DEPT-135 NMR spectra of **17e** in CDCl<sub>3</sub>

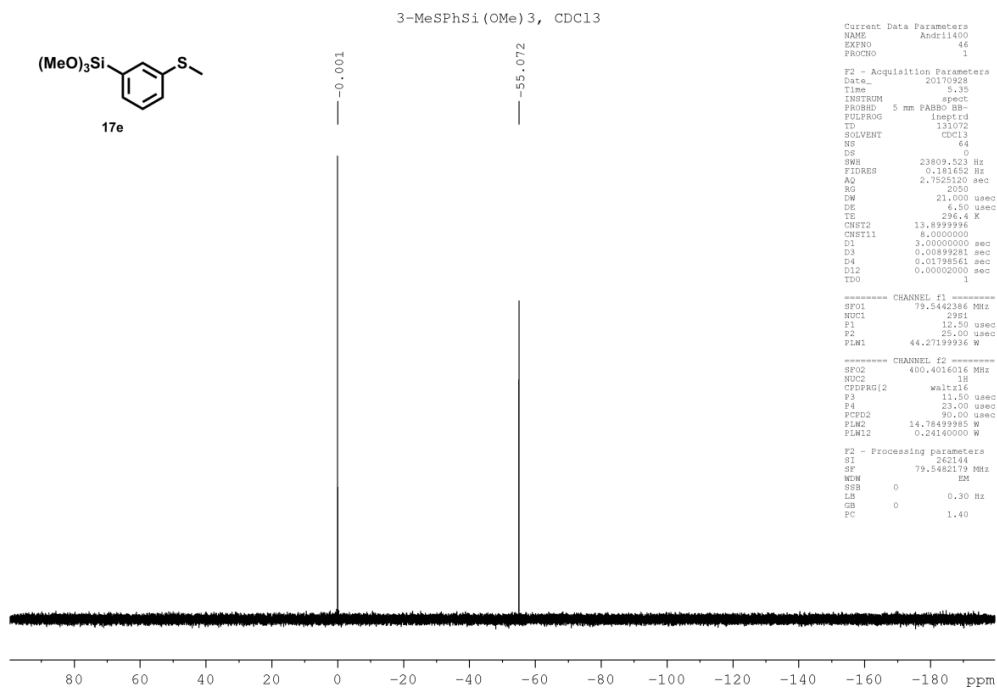

Supplementary figure 200. <sup>29</sup>Si NMR spectra of **17e** in CDCl<sub>3</sub>



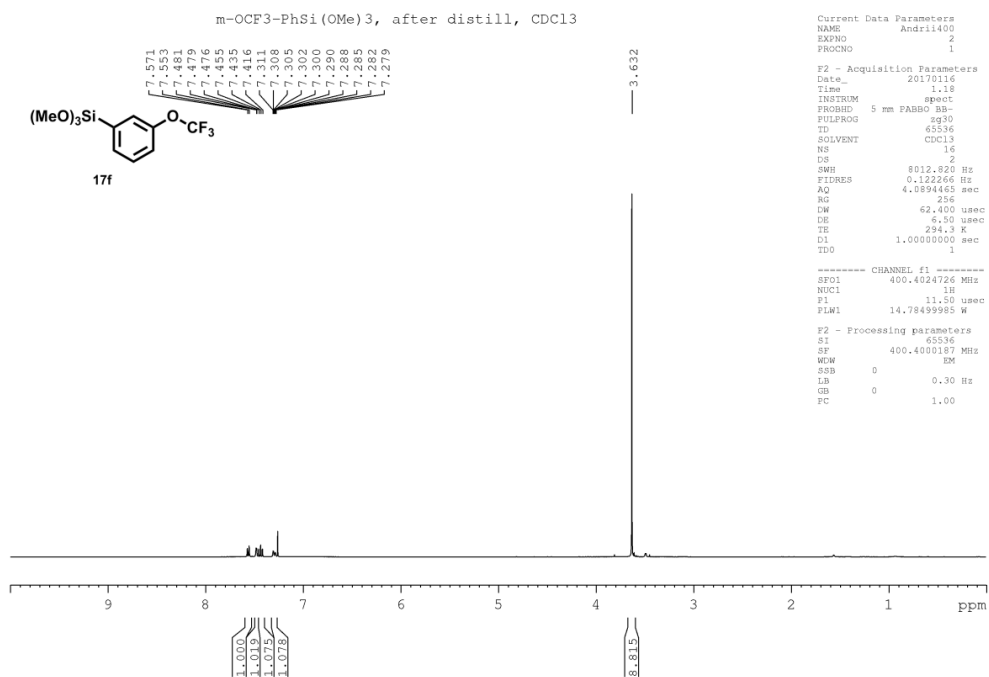

Supplementary figure 201. <sup>1</sup>H NMR spectra of **17f** in CDCl<sub>3</sub>

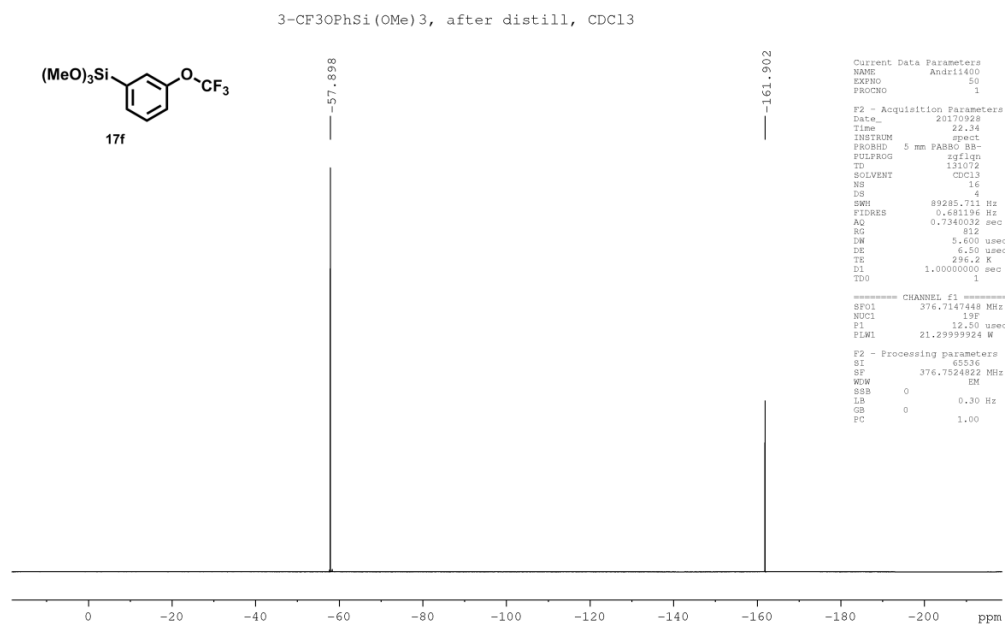

Supplementary figure 202. <sup>19</sup>F NMR spectra of **17f** in CDCl<sub>3</sub>

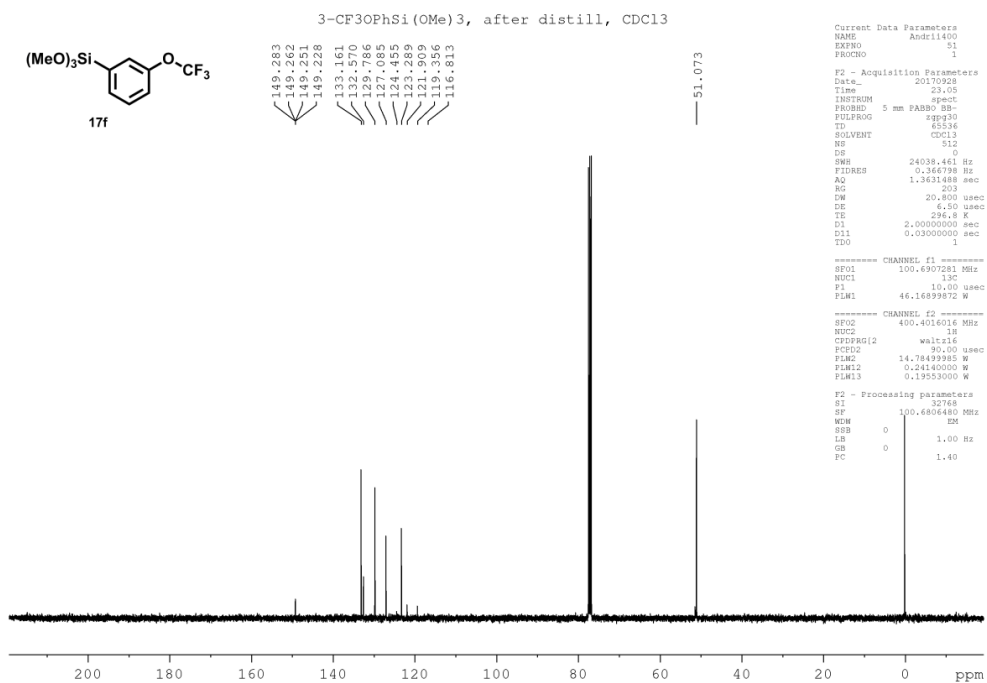

Supplementary figure 203. <sup>13</sup>C NMR spectra of **17f** in CDCl<sub>3</sub>

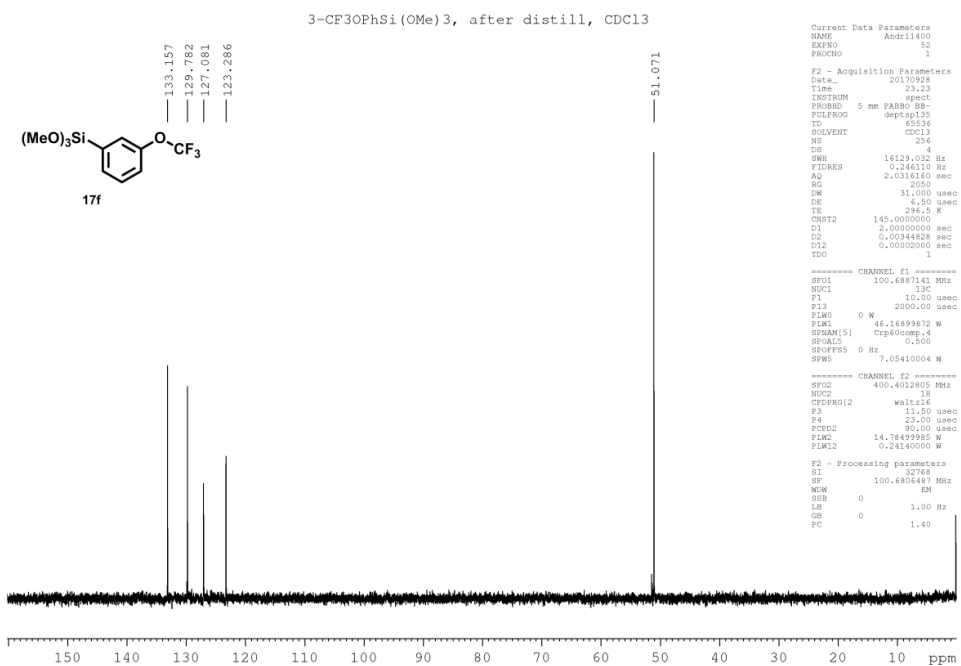

Supplementary figure 204. DEPT-135 NMR spectra of **17f** in CDCl<sub>3</sub>

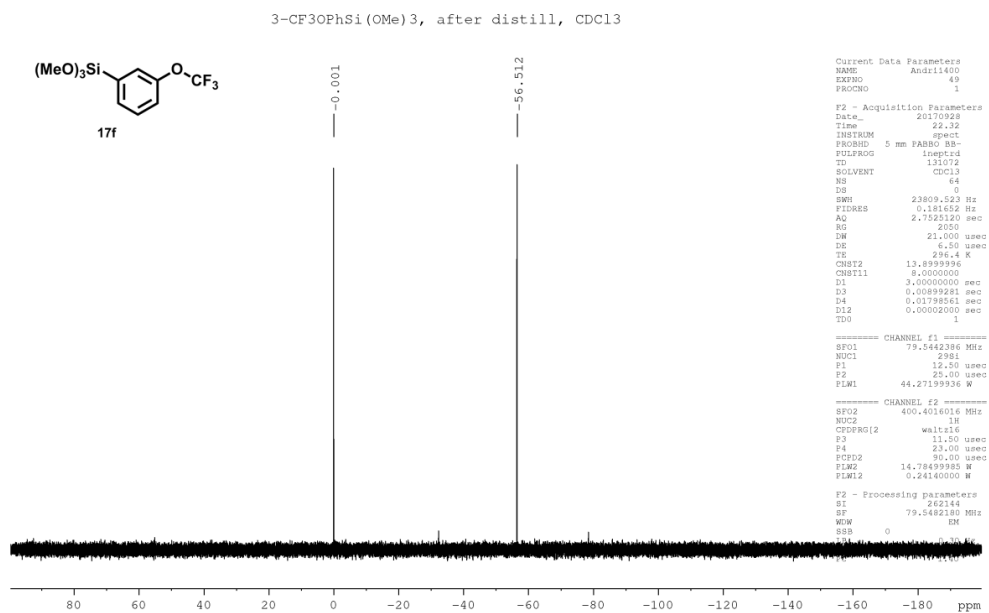

Supplementary figure 205. <sup>29</sup>Si NMR spectra of **17f** in CDCl<sub>3</sub>

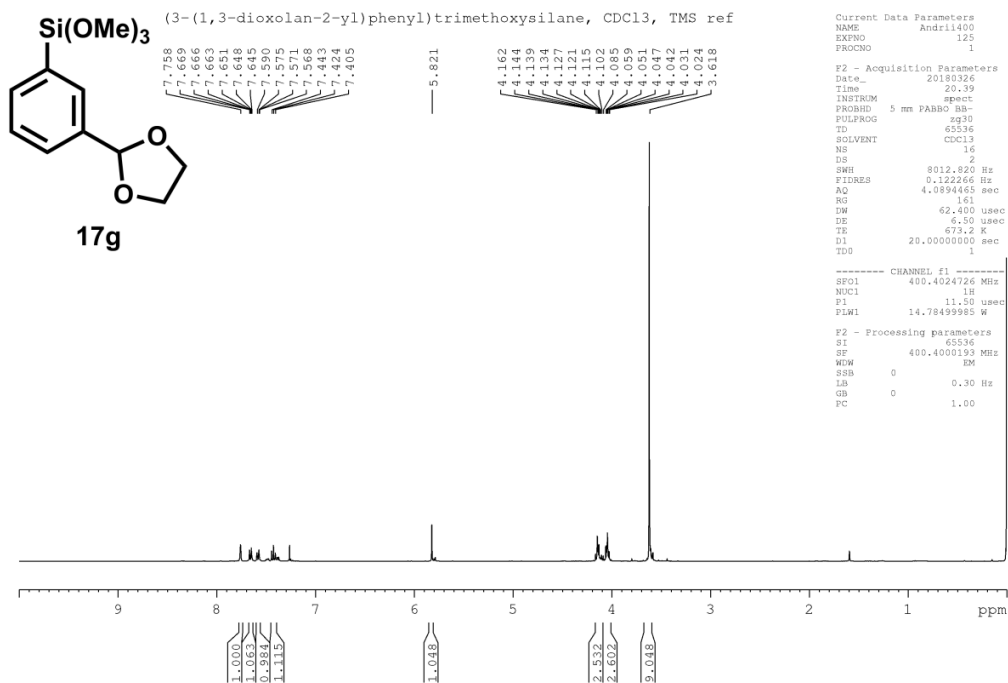

Supplementary figure 206. <sup>1</sup>H NMR spectra of **17g** in CDCl<sub>3</sub>

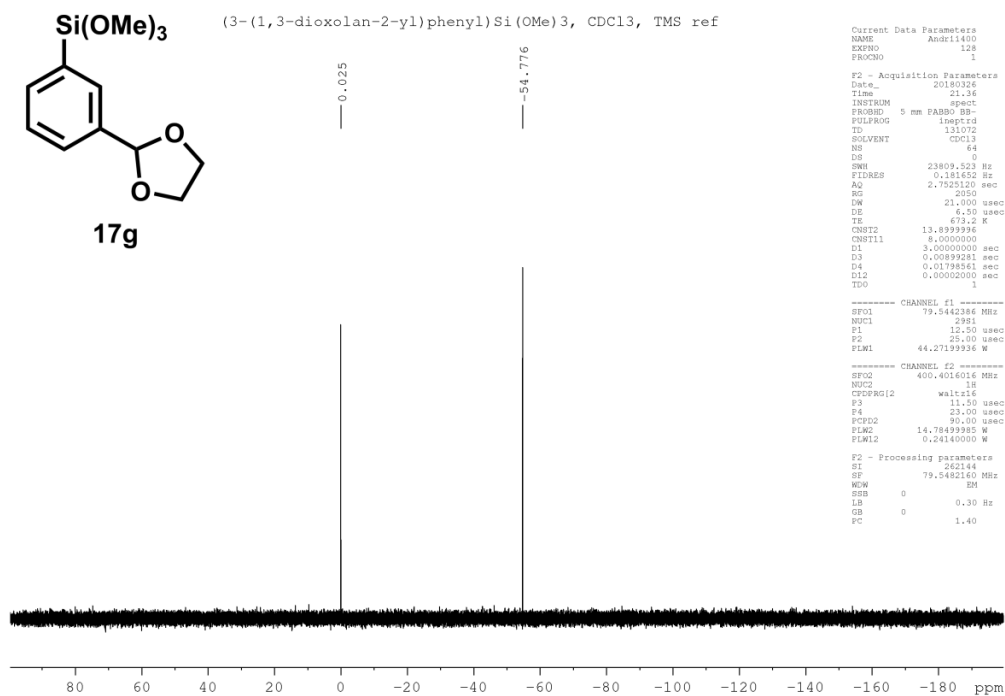

Supplementary figure 207. <sup>29</sup>Si NMR spectra of **17g** in CDCl<sub>3</sub>

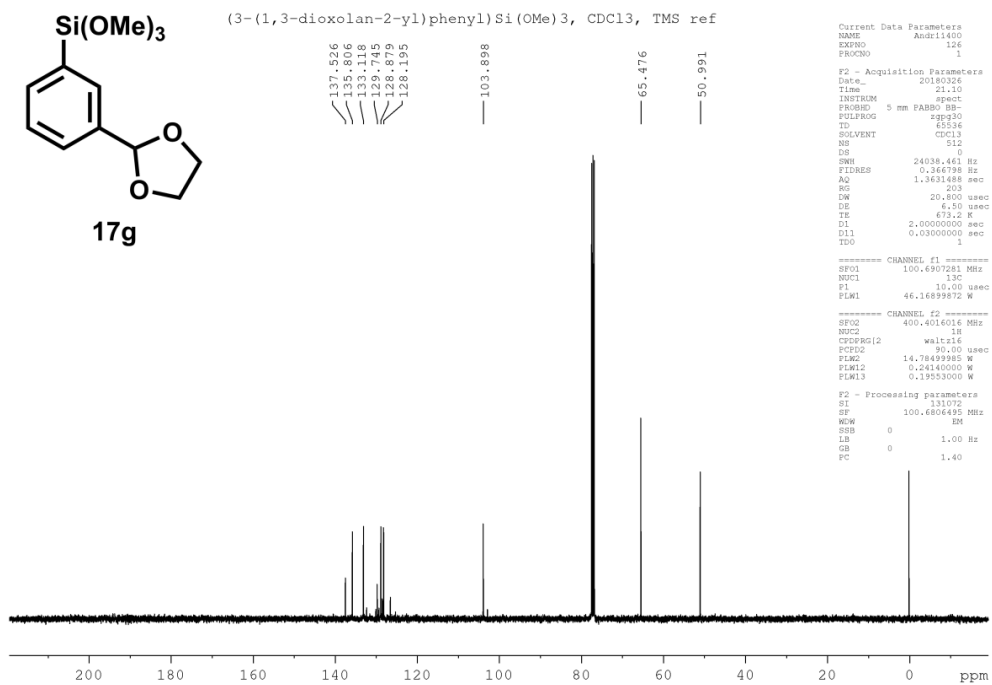

Supplementary figure 208. <sup>13</sup>C NMR spectra of **17g** in CDCl<sub>3</sub>

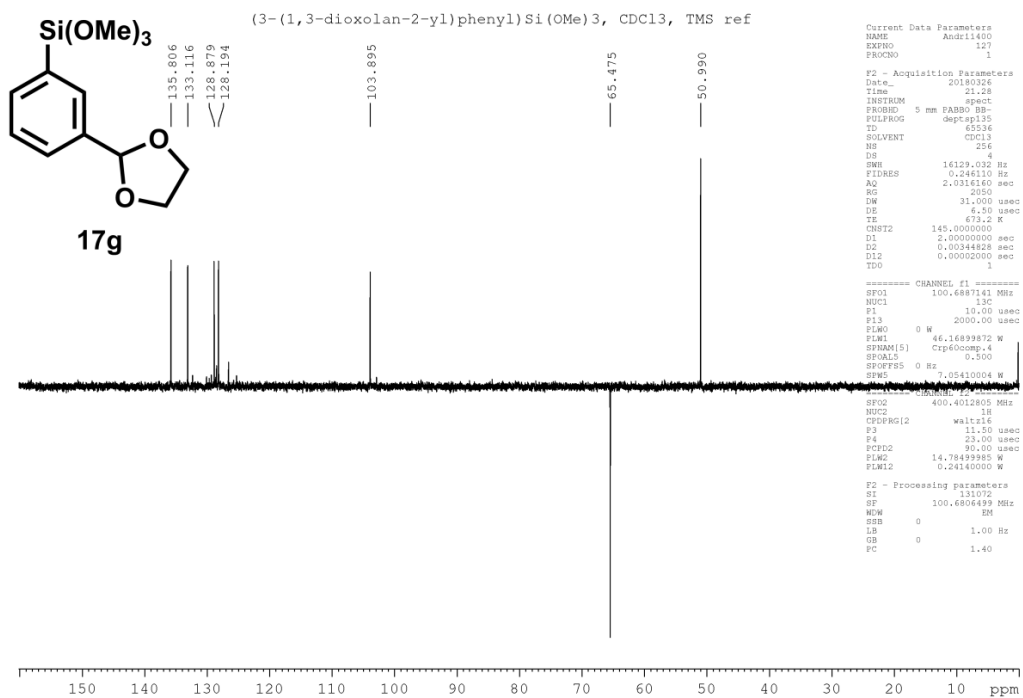

Supplementary figure 209. SEPT-135 NMR spectra of **17g** in CDCl<sub>3</sub>

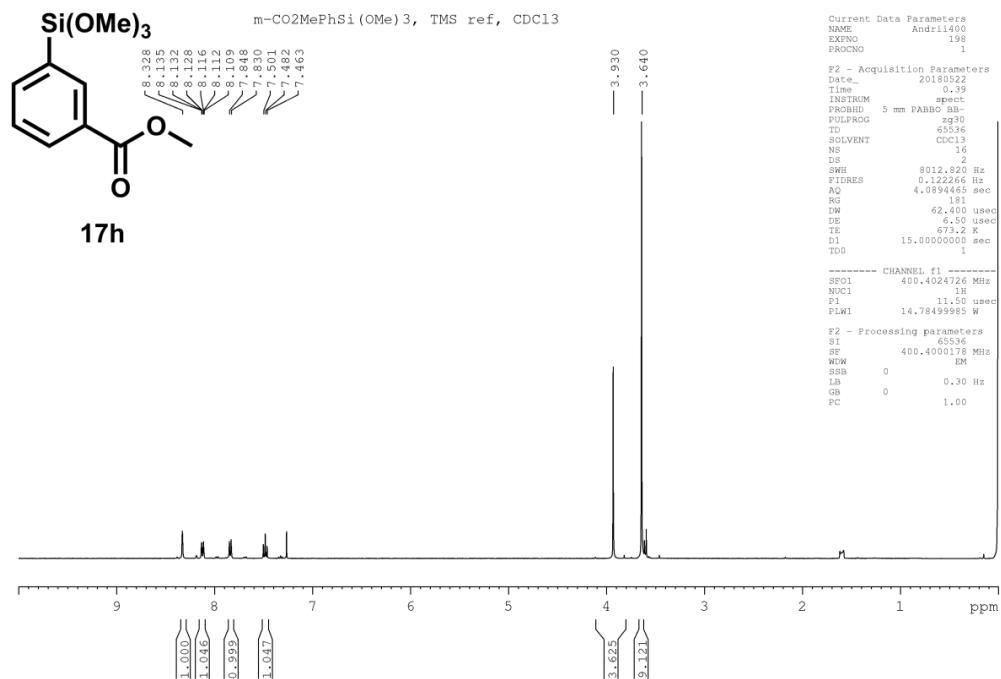

Supplementary figure 210. <sup>1</sup>H NMR spectra of **17h** in CDCl<sub>3</sub>

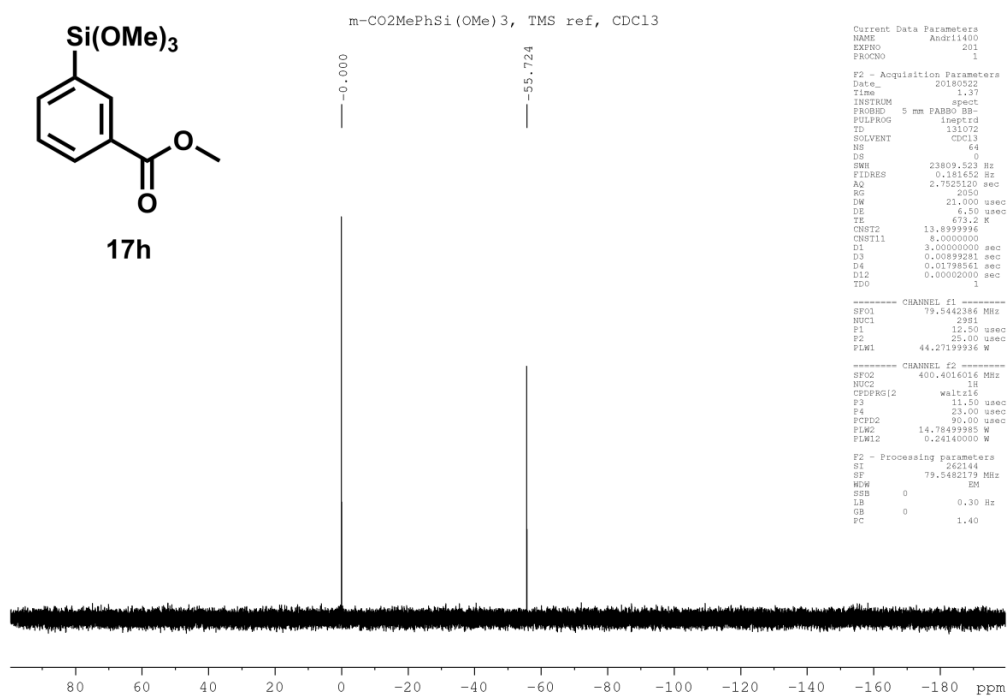

Supplementary figure 211. <sup>29</sup>Si NMR spectra of **17h** in CDCl<sub>3</sub>

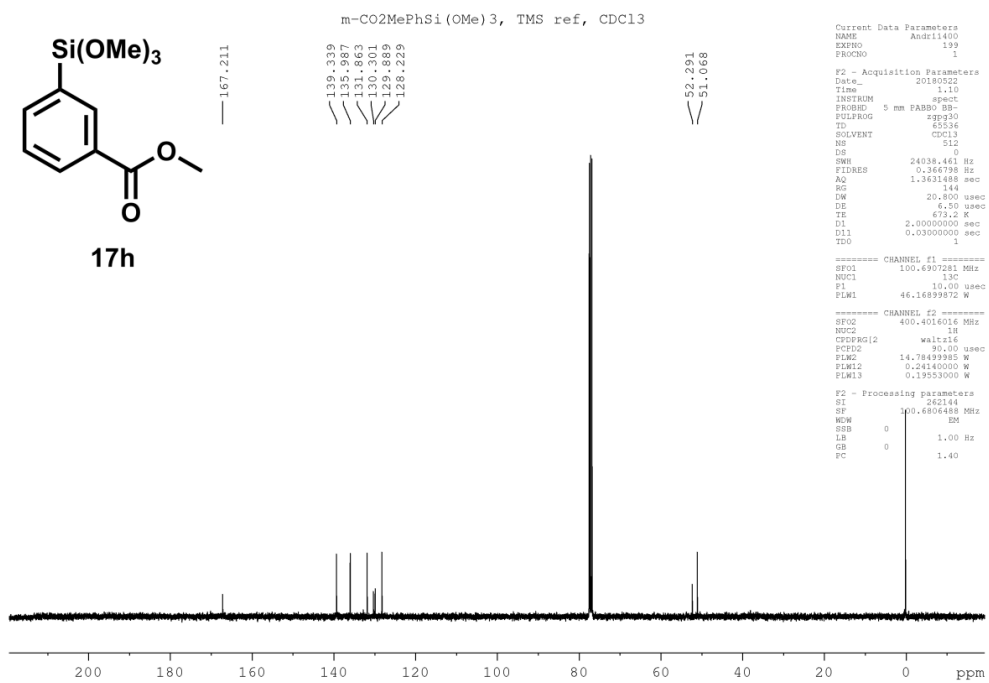

Supplementary figure 212. <sup>13</sup>C NMR spectra of **17h** in CDCl<sub>3</sub>

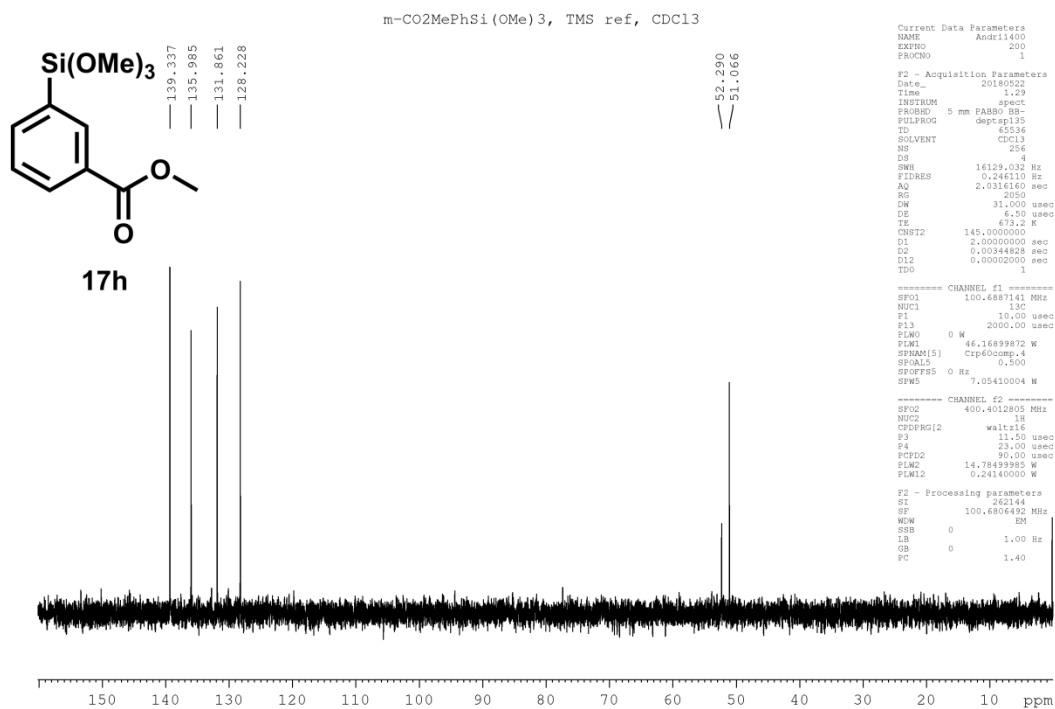

Supplementary figure 213. DEPT-135 NMR spectra of **17h** in CDCl<sub>3</sub>

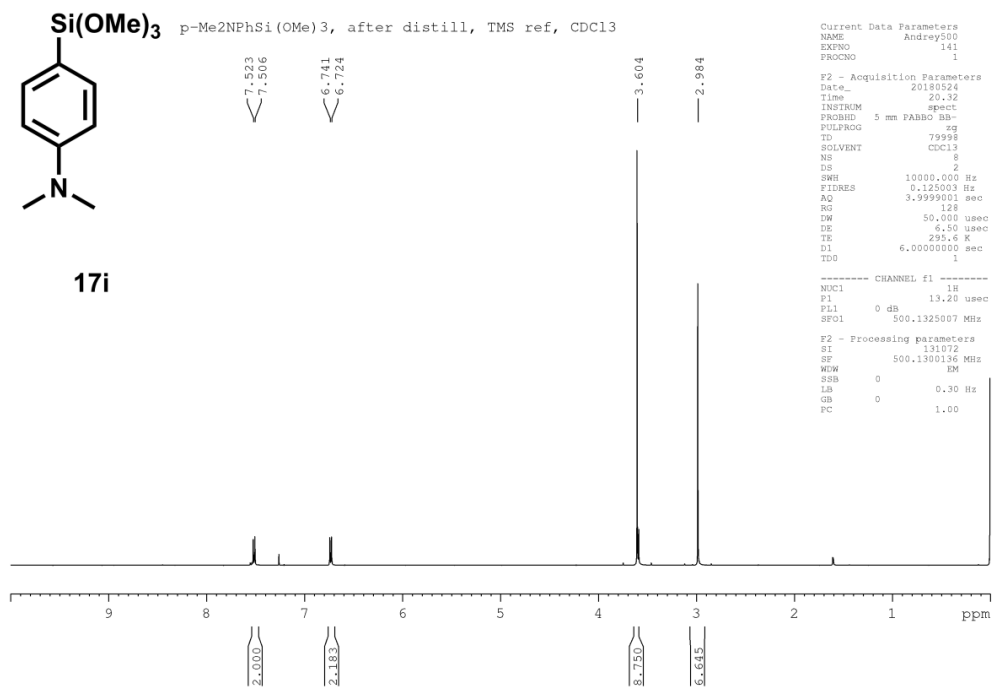

Supplementary figure 214. <sup>1</sup>H NMR spectra of **17i** in CDCl<sub>3</sub>

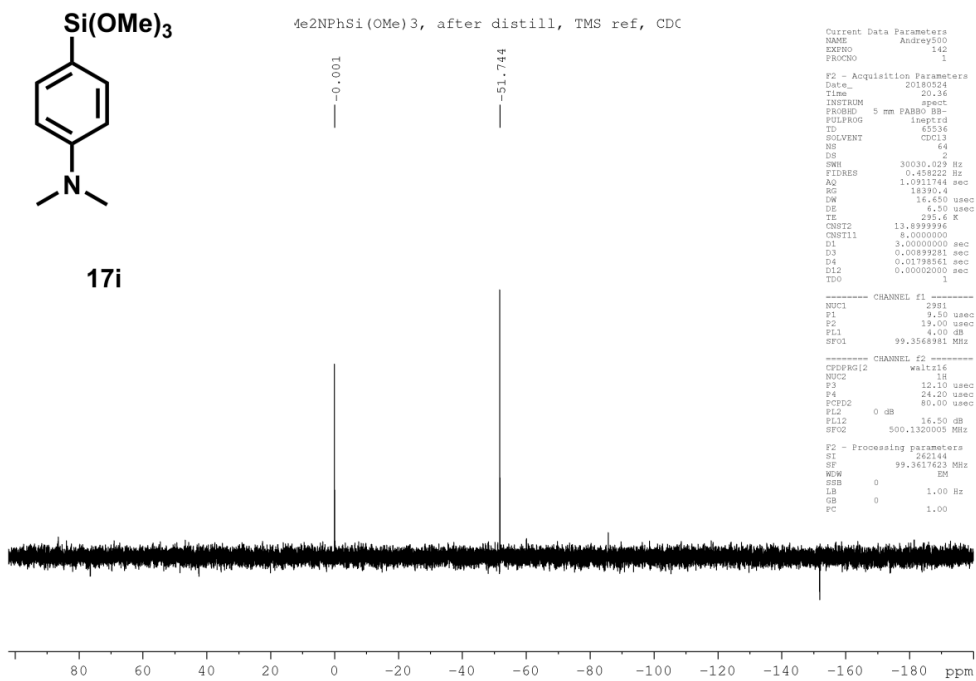

Supplementary figure 215. <sup>29</sup>Si NMR spectra of **17i** in CDCl<sub>3</sub>

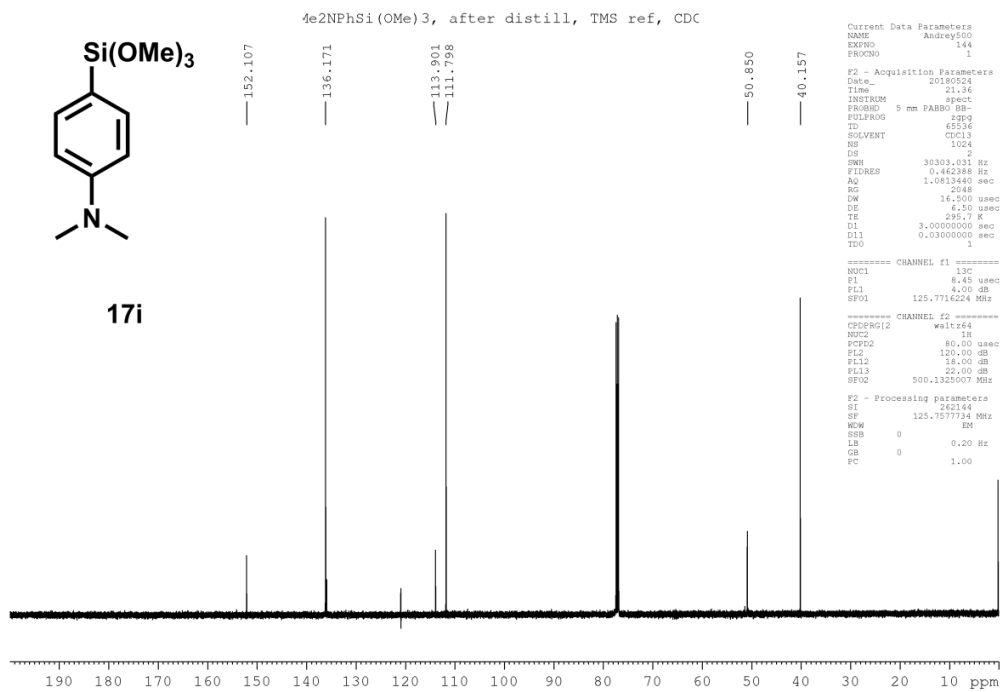

Supplementary figure 216. <sup>13</sup>C NMR spectra of **17i** in CDCl<sub>3</sub>



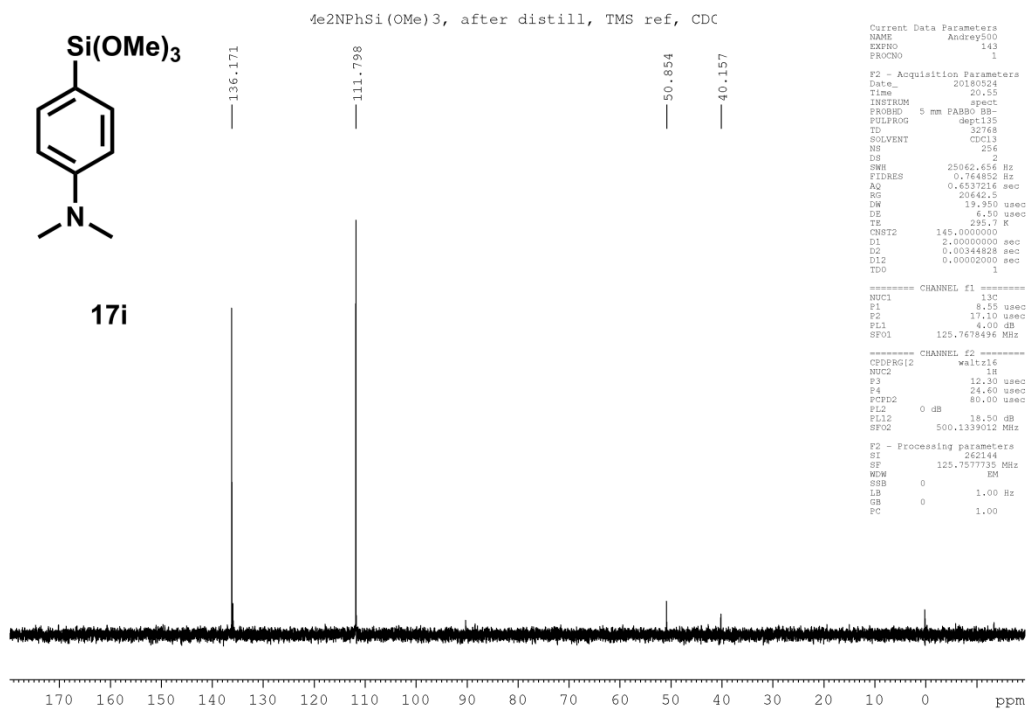

Supplementary figure 217. DEPT-135 NMR spectra of **17i** in CDCl<sub>3</sub>

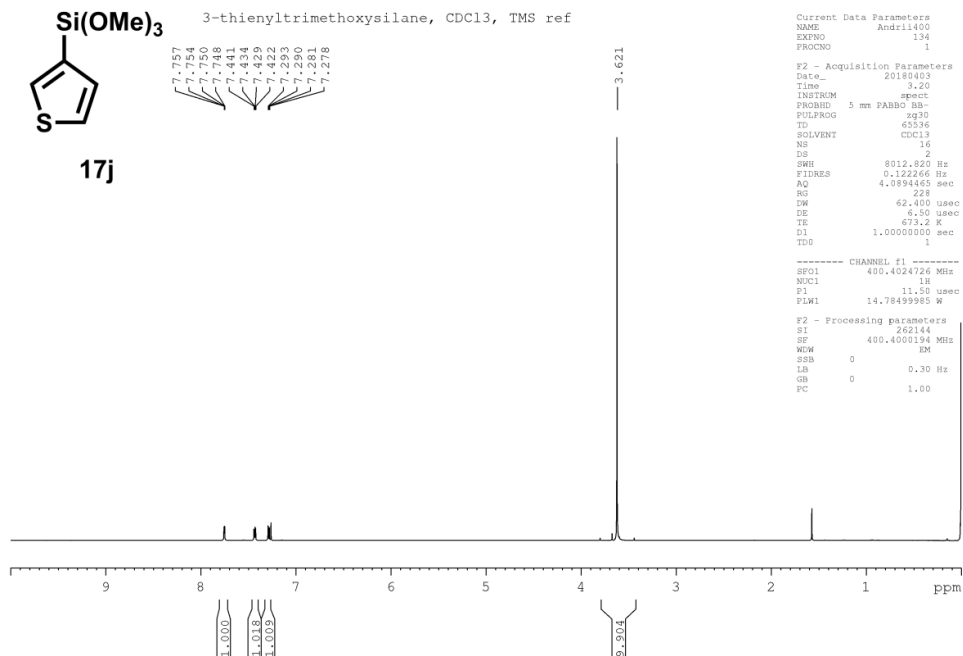

Supplementary figure 218. <sup>1</sup>H NMR spectra of **17j** in CDCl<sub>3</sub>

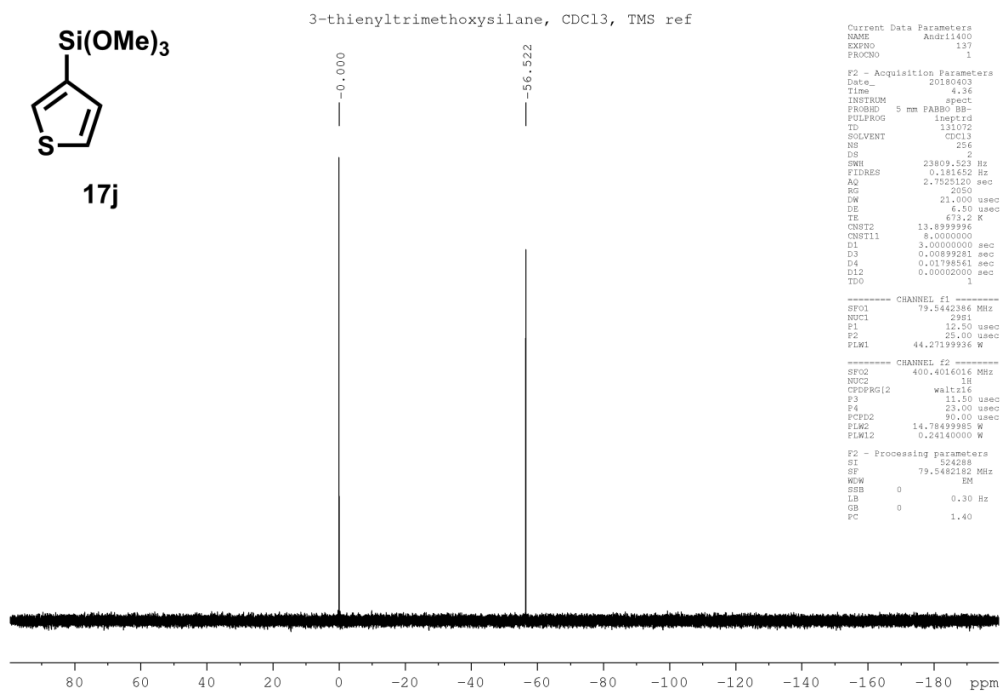

Supplementary figure 219. <sup>29</sup>Si NMR spectra of **17j** in CDCl<sub>3</sub>

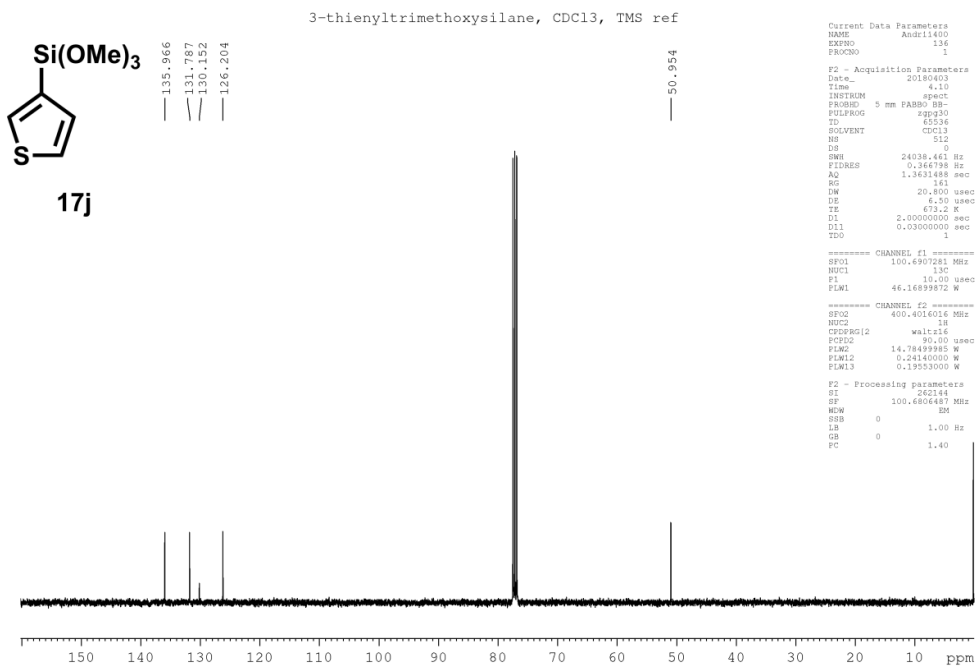

Supplementary figure 220. <sup>13</sup>C NMR spectra of **17j** in CDCl<sub>3</sub>

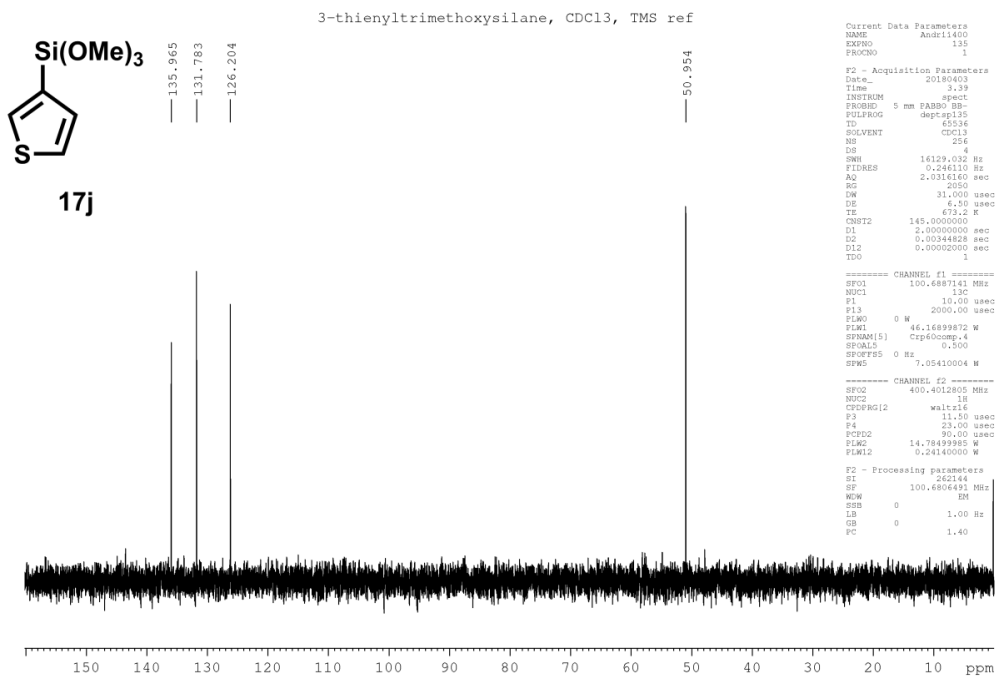

Supplementary figure 221. DEPT-135 NMR spectra of **17j** in CDCl<sub>3</sub>

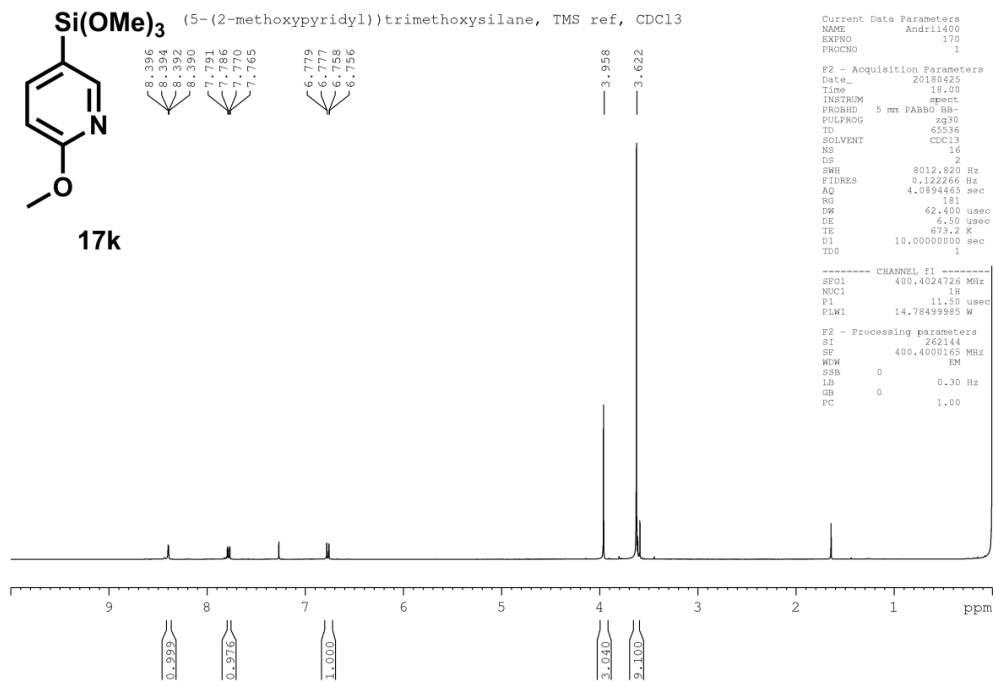

Supplementary figure 222. <sup>1</sup>H NMR spectra of **17k** in CDCl<sub>3</sub>





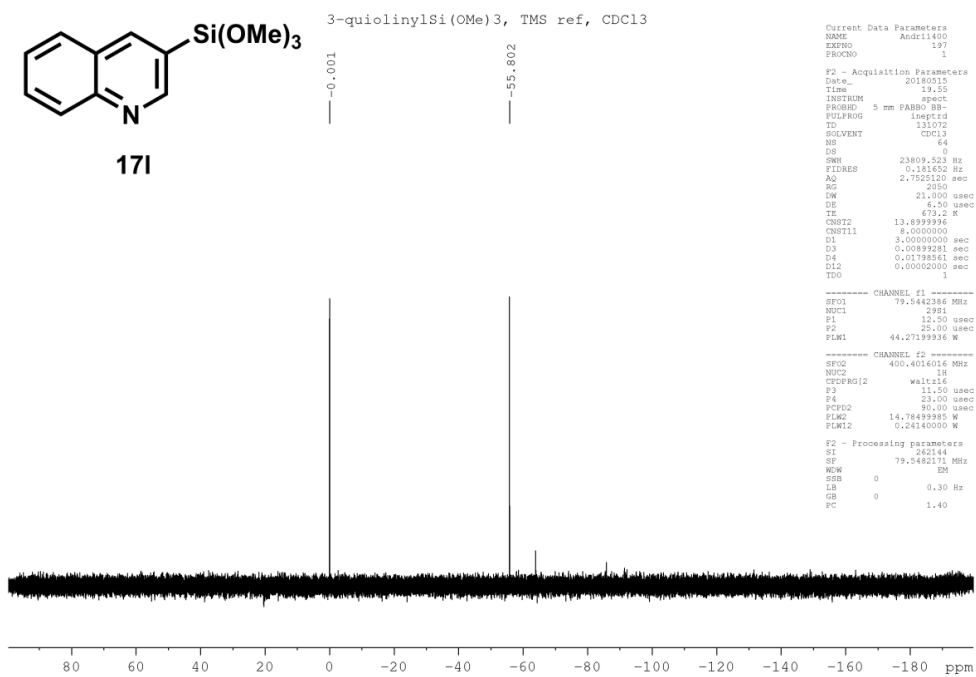

Supplementary figure 227. <sup>29</sup>Si NMR spectra of **171** in CDCl<sub>3</sub>

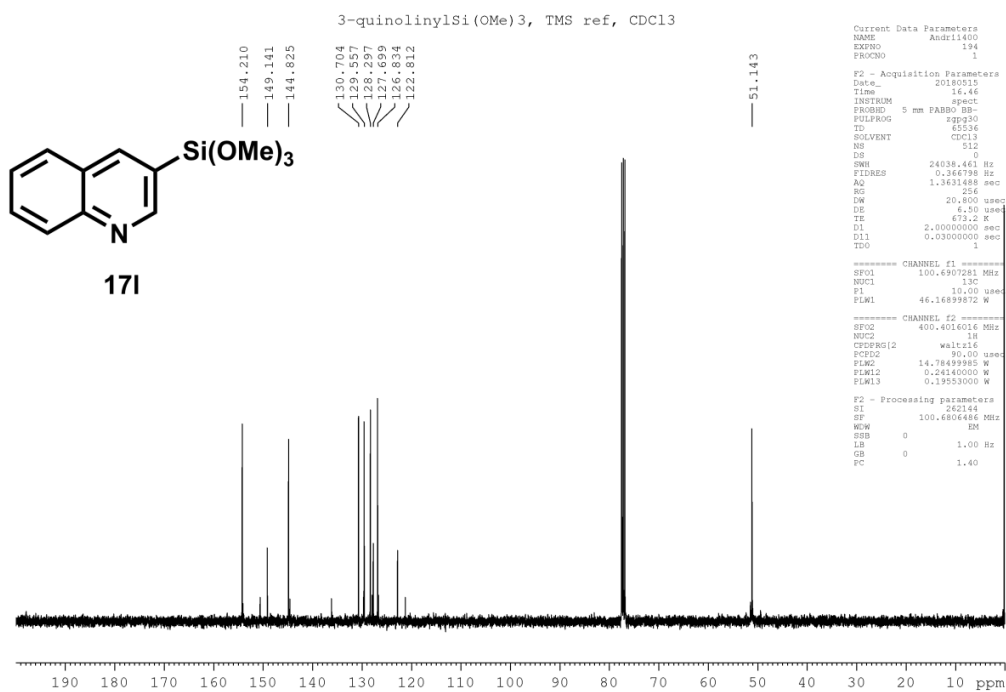

Supplementary figure 228. <sup>13</sup>C NMR spectra of **171** in CDCl<sub>3</sub>

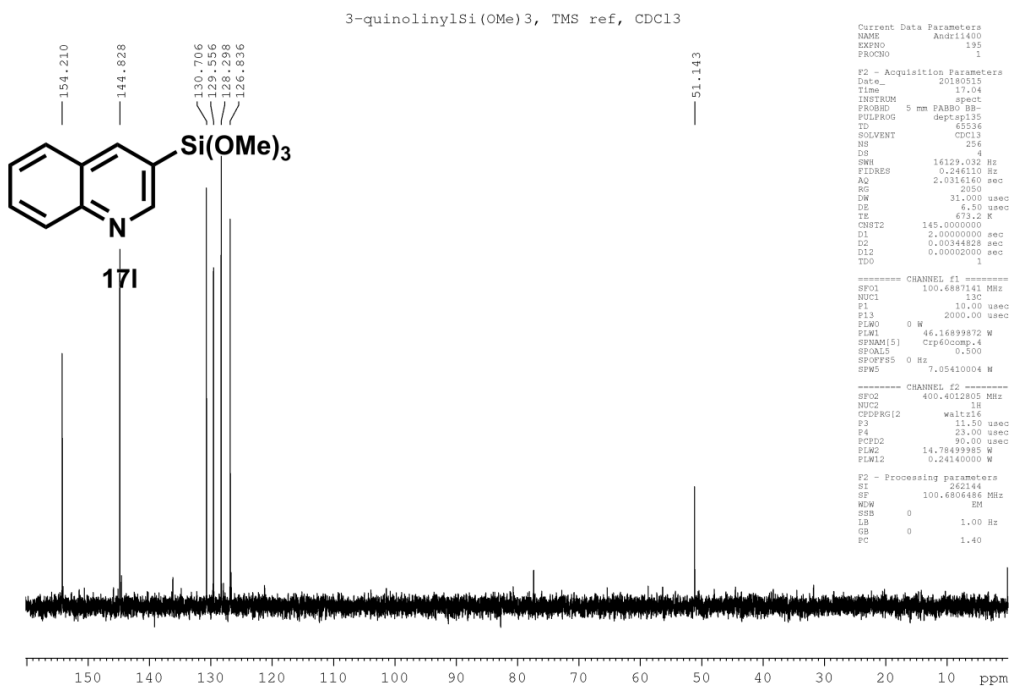

Supplementary figure 229. DEPT NMR spectra of **17l** in CDCl<sub>3</sub>

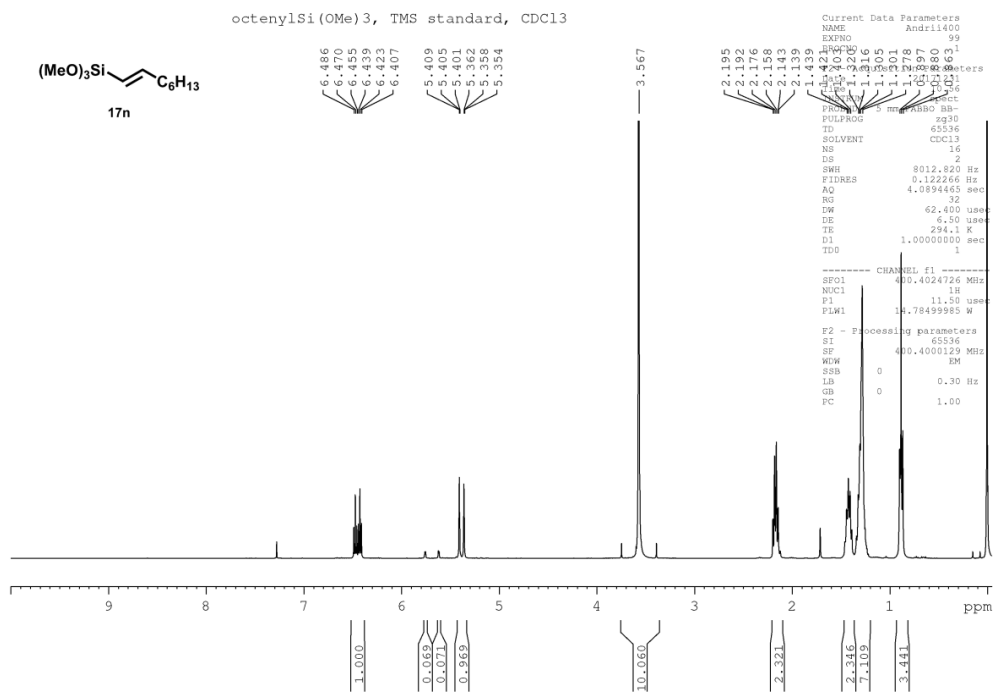

Supplementary figure 230. <sup>1</sup>H NMR spectra of **17n** in CDCl<sub>3</sub>

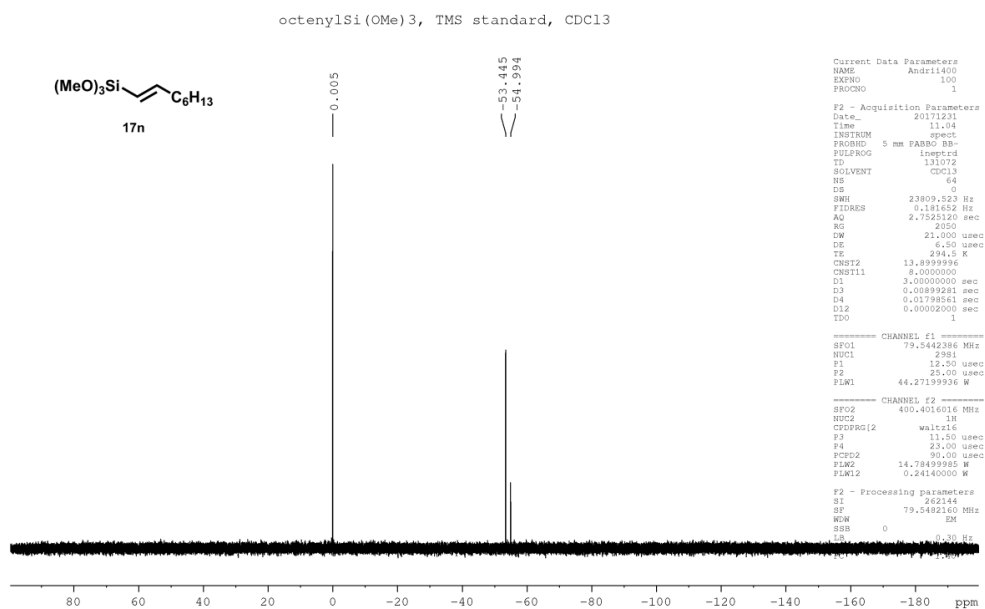

Supplementary figure 231. <sup>29</sup>Si NMR spectra of **17n** in CDCl<sub>3</sub>

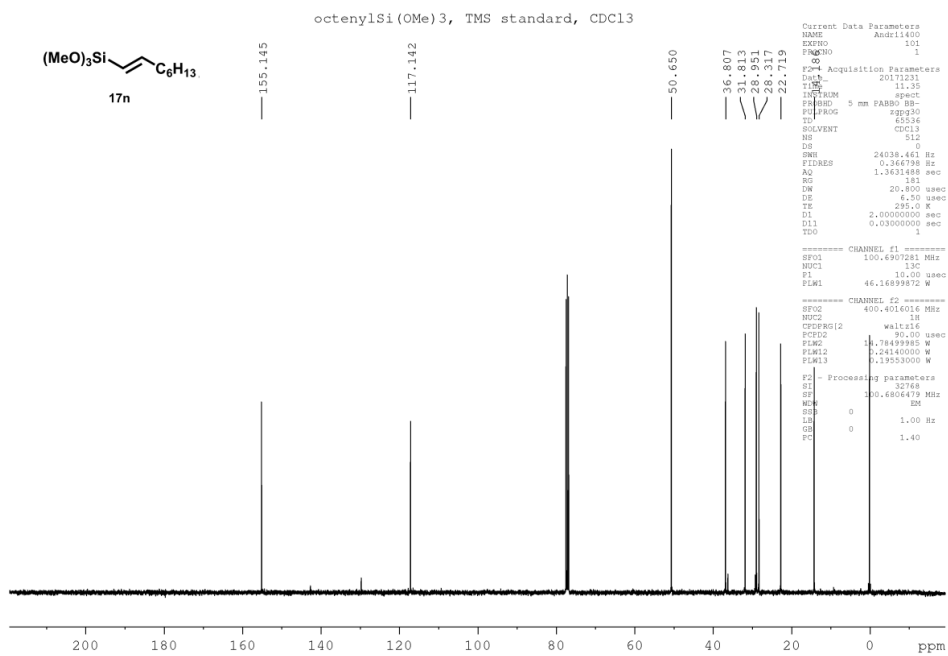

Supplementary figure 232. <sup>13</sup>C NMR spectra of **17n** in CDCl<sub>3</sub>



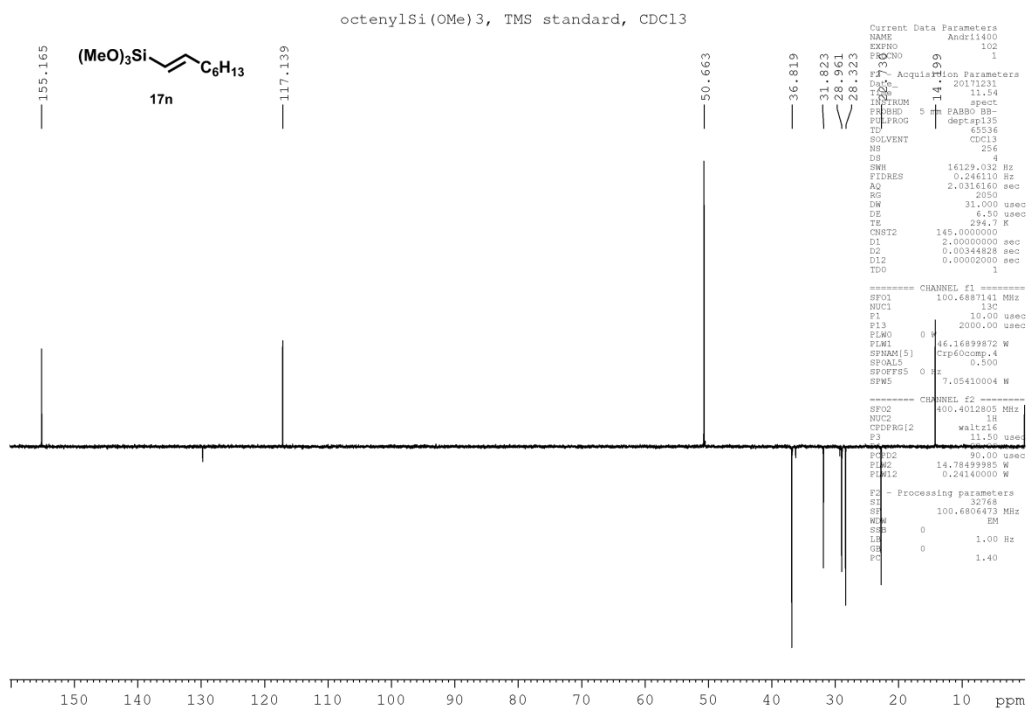

Supplementary figure 233. DEPT-135 NMR spectra of **17n** in CDCl<sub>3</sub>

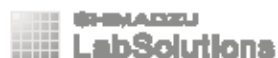

# Analysis Report

## <Sample Information>

Sample Name : CF3-(Ph)OBnCF3, old Me(4,5diPh)BOX  
 Sample ID : CF3-(Ph)OBnCF3, oldMe(4,5diPh)B  
 Data Filename : CF3-(Ph)OBnCF3, old Me(4,5diPh)BOX8.lcd  
 Method Filename : new.lcm  
 Batch Filename :  
 Vial # : 1-19  
 Injection Volume : 4 uL  
 Date Acquired : 10/02/2017 02:19:18  
 Date Processed : 10/02/2017 05:28:51

Sample Type : Unknown  
 Acquired by : System Administrator  
 Processed by : System Administrator

## <Chromatogram>

mAU

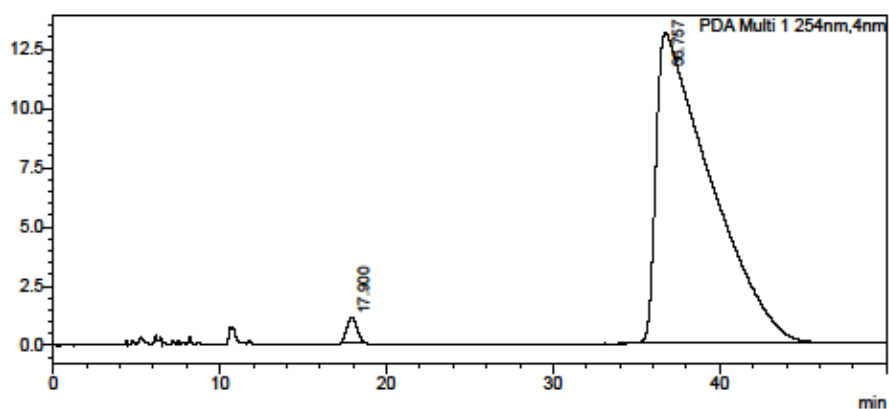

## <Peak Table>

PDA Ch1 254nm

| Peak# | Ret. Time | Area    | Area%   | Height |
|-------|-----------|---------|---------|--------|
| 1     | 17.900    | 48797   | 1.548   | 1074   |
| 2     | 36.757    | 2976625 | 98.452  | 13088  |
| Total |           | 3023422 | 100.000 | 14163  |

C:\Andrey\CF3-(Ph)OBnCF3, old Me(4,5diPh)BOX8.lcd

Supplementary figure 234. HPLC chromatogram for compound **6a**, Ligand:(**4S,5R**)-**7a**


**LabSolutions** Analysis Report

## &lt;Sample Information&gt;

Sample Name : CF3(Ph)-OBnCF3  
 Sample ID : CF3(Ph)-OBnCF3  
 Data Filename : CF3(Ph)-OBnCF3  
 Method Filename : andrey.lcm  
 Batch Filename :  
 Vial # : 1-43  
 Injection Volume : 6 uL  
 Date Acquired : 03/05/2017 13:14:41  
 Date Processed : 10/05/2017 16:15:56

Sample Type : Unknown  
 Acquired by : System Administrator  
 Processed by : System Administrator

## &lt;Chromatogram&gt;

mAU

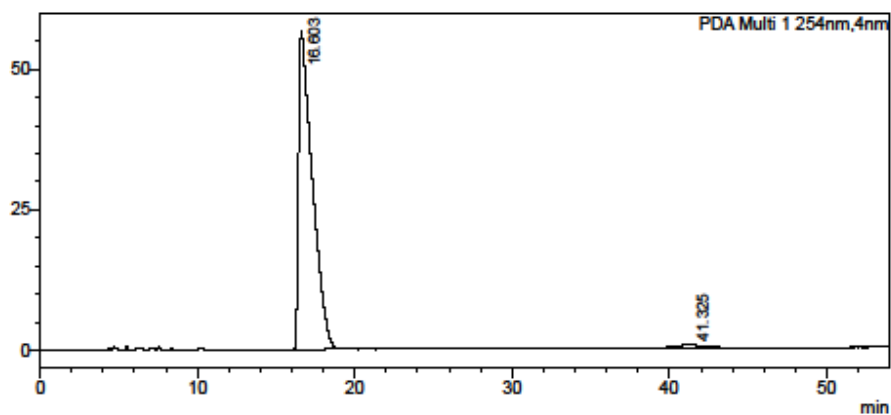

## &lt;Peak Table&gt;

PDA Ch1 254nm

| Peak# | Ret. Time | Area    | Area%   | Height |
|-------|-----------|---------|---------|--------|
| 1     | 16.603    | 3451656 | 97.991  | 56650  |
| 2     | 41.325    | 70766   | 2.009   | 499    |
| Total |           | 3522423 | 100.000 | 57149  |

C:\Andrey\CF3(Ph)-OBnCF3\_rac2.lcd

Supplementary figure 235. HPLC chromatogram for compound 6a, Ligand:(4R,5S)-7a



# Analysis Report

**<Sample Information>**

Sample Name : CF3(Ph)-OBnCF3rac  
 Sample ID : CF3(Ph)-OBnCF3rac  
 Data Filename : CF3(Ph)-OBnCF3rac4.lcd  
 Method Filename : andrey.lcm  
 Batch Filename :  
 Vial # : 1-50  
 Injection Volume : 3 uL  
 Date Acquired : 29/05/2017 12:29:41  
 Date Processed : 01/06/2017 10:52:16  
 Sample Type : Unknown  
 Acquired by : System Administrator  
 Processed by : System Administrator

**<Chromatogram>**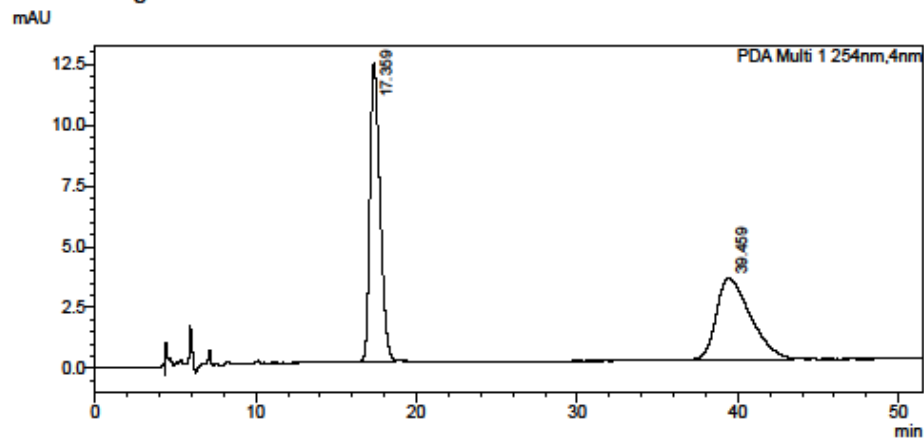**<Peak Table>**

PDA Ch1 254nm

| Peak# | Ret. Time | Area    | Area%   | Height |
|-------|-----------|---------|---------|--------|
| 1     | 17.359    | 531010  | 51.844  | 12244  |
| 2     | 39.459    | 493232  | 48.156  | 3340   |
| Total |           | 1024242 | 100.000 | 15584  |

C:\Andrey\CF3(Ph)-OBnCF3rac4.lcd

Supplementary figure 236. HPLC chromatogram for the compound **6a**, Racemic

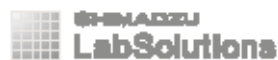

# Analysis Report

## <Sample Information>

Sample Name : CF3(p-MeO)-OBnCF3,Me(4,5diPh)\_BOX  
 Sample ID : CF3(p-MeO)-OBnCF3,Me(4,5diPh)\_B  
 Data Filename : CF3(p-MeO)-OBnCF3,Me(4,5diPh)\_BOX1.lcd  
 Method Filename : new.lcm  
 Batch Filename :  
 Vial # : 1-33  
 Injection Volume : 2 uL  
 Date Acquired : 14/03/2017 16:52:42  
 Date Processed : 10/05/2017 16:24:31

Sample Type : Unknown  
 Acquired by : System Administrator  
 Processed by : System Administrator

## <Chromatogram>

mAU

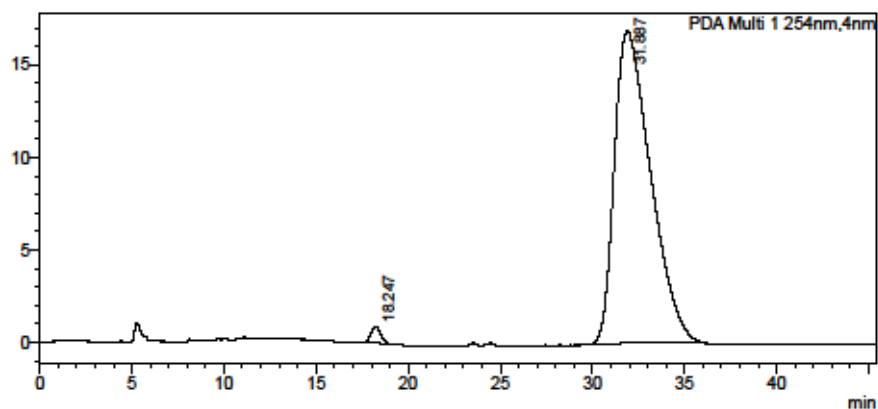

## <Peak Table>

| PDA Ch1 254nm |           |         |         |        |
|---------------|-----------|---------|---------|--------|
| Peak#         | Ret. Time | Area    | Area%   | Height |
| 1             | 18.247    | 32275   | 1.382   | 915    |
| 2             | 31.887    | 2302353 | 98.618  | 16856  |
| Total         |           | 2334628 | 100.000 | 17771  |

C:\Andrey\CF3(p-MeO)-OBnCF3,Me(4,5diPh)\_BOX1.lcd

Supplementary figure 237. HPLC chromatogram for compound **6b**, Ligand:(**4S,5R**)-**7a**

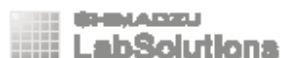

# Analysis Report

## <Sample Information>

Sample Name : CF3-(p-MeOPh)OBnCF3, Me(4,5diPh)BOX  
 Sample ID : CF3-(p-MeOPh)OBnCF3, Me(4,5diPh)  
 Data Filename : CF3-(p-MeOPh)OBnCF3, Me(4,5diPh)BOX2.lcd  
 Method Filename : new.lcm  
 Batch Filename :  
 Vial # : 1-17  
 Injection Volume : 4 uL  
 Date Acquired : 07/02/2017 02:17:17  
 Date Processed : 07/02/2017 03:07:18

Sample Type : Unknown  
 Acquired by : System Administrator  
 Processed by : System Administrator

## <Chromatogram>

mAU

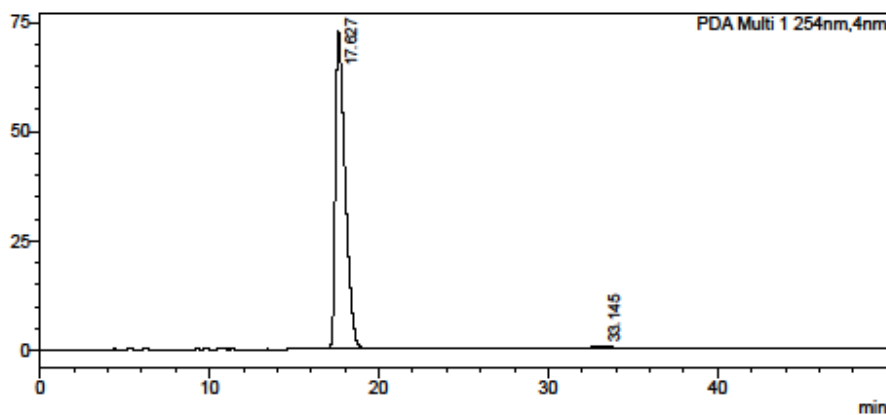

## <Peak Table>

PDA Ch1 254nm

| Peak# | Ret. Time | Area    | Area%   | Height |
|-------|-----------|---------|---------|--------|
| 1     | 17.827    | 2905052 | 98.415  | 72681  |
| 2     | 33.145    | 46790   | 1.585   | 441    |
| Total |           | 2951842 | 100.000 | 73122  |

C:\Andrey\CF3-(p-MeOPh)OBnCF3, Me(4,5diPh)BOX2.lcd

Supplementary figure 238. HPLC chromatogram for compound 6b, Ligand:(4R,5S)-7a

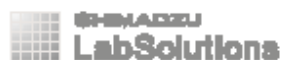

# Analysis Report

## <Sample Information>

Sample Name : CF3(p-MeOPh)-OBnCF3\_rac  
 Sample ID : CF3(p-MeOPh)-OBnCF3\_rac  
 Data Filename : CF3(p-MeOPh)-OBnCF3\_rac1.lcd  
 Method Filename : andrey.lcm  
 Batch Filename :  
 Vial # : 1-85  
 Injection Volume : 4 uL  
 Date Acquired : 28/06/2017 14:06:51  
 Date Processed : 30/06/2017 17:24:26

Sample Type : Unknown  
 Acquired by : System Administrator  
 Processed by : System Administrator

## <Chromatogram>

mAU

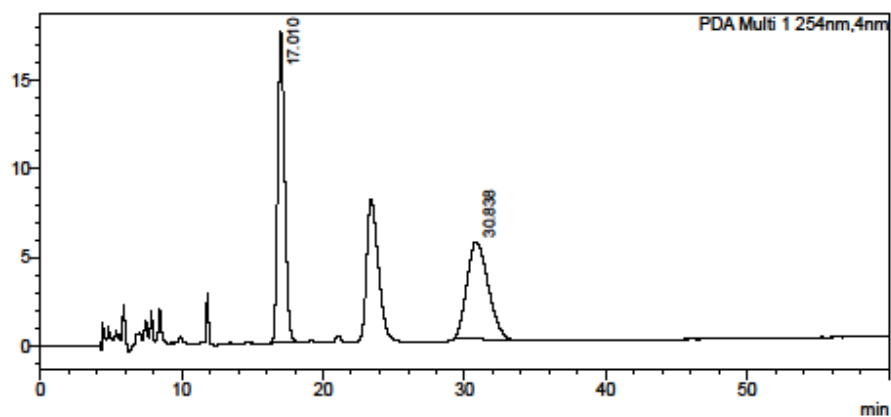

## <Peak Table>

PDA Ch1 254nm

| Peak# | Ret. Time | Area    | Area%   | Height |
|-------|-----------|---------|---------|--------|
| 1     | 17.010    | 605676  | 51.352  | 17509  |
| 2     | 30.838    | 573779  | 48.648  | 5490   |
| Total |           | 1179455 | 100.000 | 22998  |

C:\Andrey\CF3(p-MeOPh)-OBnCF3\_rac1.lcd

Supplementary figure 239. HPLC chromatogram for compound **6b**, Racemic

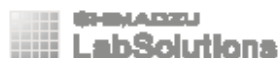

# Analysis Report

## <Sample Information>

Sample Name : CF3-(p-FPh)OBnCF3, Me(4,5diPh)BOX  
 Sample ID : CF3-(p-FPh)OBnCF3, Me(4,5diPh)B  
 Data Filename : CF3-(p-FPh)OBnCF3, Me(4,5diPh)BOX1.lcd  
 Method Filename : new.lcm  
 Batch Filename :  
 Vial # : 1-19  
 Injection Volume : 4 uL  
 Date Acquired : 09/02/2017 04:30:49  
 Date Processed : 10/02/2017 01:53:48

Sample Type : Unknown  
 Acquired by : System Administrator  
 Processed by : System Administrator

## <Chromatogram>

mAU

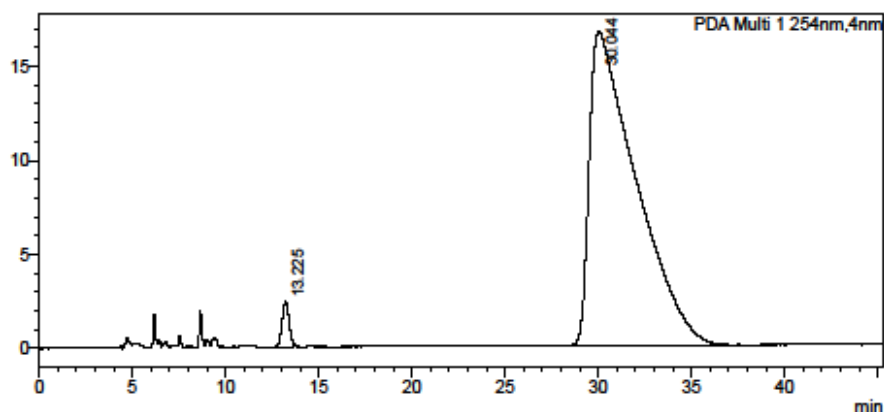

## <Peak Table>

PDA Ch1 254nm

| Peak# | Ret. Time | Area    | Area%   | Height |
|-------|-----------|---------|---------|--------|
| 1     | 13.225    | 63452   | 2.132   | 2410   |
| 2     | 30.044    | 2913069 | 97.868  | 16682  |
| Total |           | 2976521 | 100.000 | 19092  |

C:\Andrey\CF3-(p-FPh)OBnCF3, Me(4,5diPh)BOX1.lcd

Supplementary figure 240. HPLC chromatogram for compound **6c**, Ligand:(**4S,5R**)-**7a**



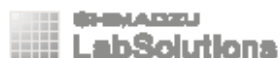

# Analysis Report

## <Sample Information>

Sample Name : CF3(p-F-Ph)-OBnCF3,Me(4,5diPh)BOX  
 Sample ID : CF3(p-F-Ph)-OBnCF3,Me(4,5diPh)B  
 Data Filename : CF3(p-F-Ph)-OBnCF3,Me(4,5diPh)BOX2.lcd  
 Method Filename : new.lcm  
 Batch Filename :  
 Vial # : 1-27  
 Injection Volume : 4 uL  
 Date Acquired : 05/03/2017 13:09:48  
 Date Processed : 05/03/2017 13:55:05

Sample Type : Unknown  
 Acquired by : System Administrator  
 Processed by : System Administrator

## <Chromatogram>

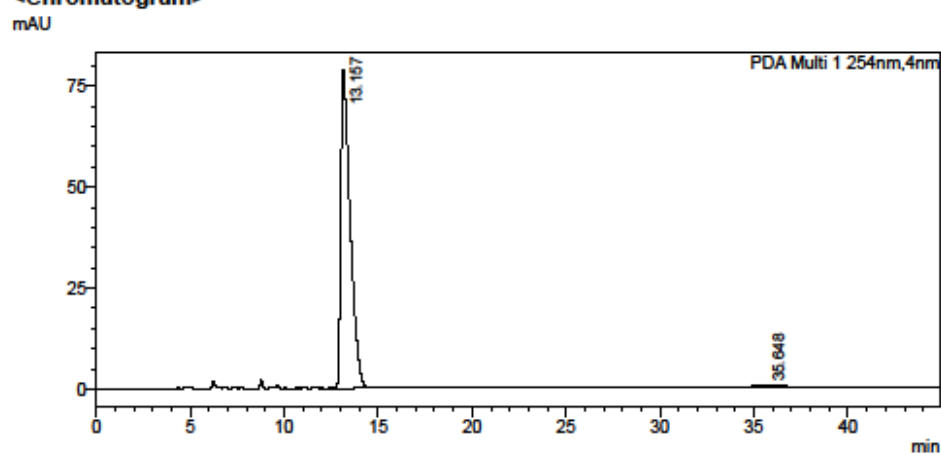

## <Peak Table>

PDA Ch1 254nm

| Peak# | Ret. Time | Area    | Area%   | Height |
|-------|-----------|---------|---------|--------|
| 1     | 13.157    | 2739781 | 97.848  | 78587  |
| 2     | 35.648    | 60260   | 2.152   | 397    |
| Total |           | 2800041 | 100.000 | 78984  |

C:\Andrey\CF3(p-F-Ph)-OBnCF3,Me(4,5diPh)BOX2.lcd

Supplementary figure 241. HPLC chromatogram for compound 6c, Ligand:(4R,5S)-7a

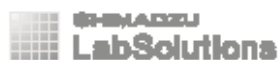

# Analysis Report

## <Sample Information>

Sample Name : CF3(p-F-Ph)-OBnCF3\_rac  
 Sample ID : CF3(p-F-Ph)-OBnCF3\_rac  
 Data Filename : CF3(p-F-Ph)-OBnCF3\_rac1.lcd  
 Method Filename : shutdown.lcm  
 Batch Filename :  
 Vial # : 1-82  
 Injection Volume : 3 uL  
 Date Acquired : 06/07/2017 13:26:35  
 Date Processed : 09/07/2017 10:01:19

Sample Type : Unknown  
 Acquired by : System Administrator  
 Processed by : System Administrator

## <Chromatogram>

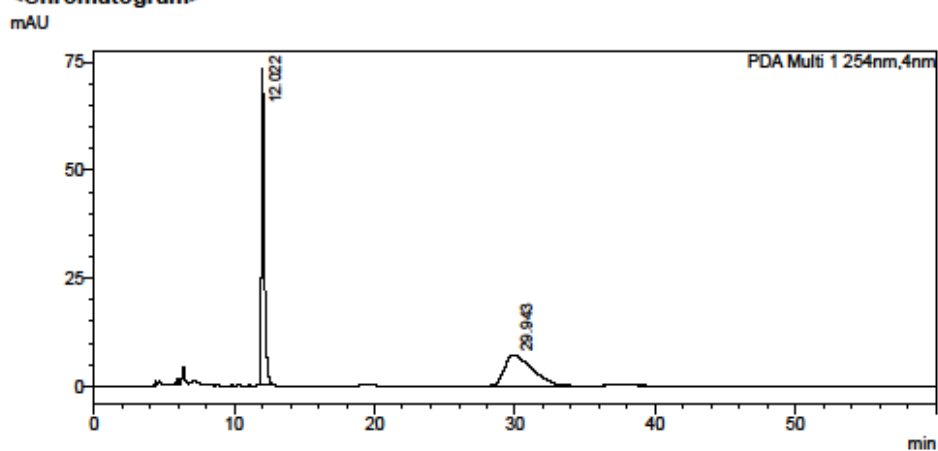

## <Peak Table>

PDA Ch1 254nm

| Peak# | Ret. Time | Area    | Area%   | Height |
|-------|-----------|---------|---------|--------|
| 1     | 12.022    | 1067534 | 52.039  | 73198  |
| 2     | 29.943    | 983892  | 47.961  | 7168   |
| Total |           | 2051425 | 100.000 | 80365  |

C:\Andrey\CF3(p-F-Ph)-OBnCF3\_rac1.lcd

Supplementary figure 242. HPLC chromatogram for compound 6c, Racemic



# Analysis Report

## <Sample Information>

Sample Name : CF3-(p-MePh)OBnCF3,Me(4,5diPh)BOX  
 Sample ID : CF3-(pMePh)OBnCF3, Me(4,5diPh)  
 Data Filename : CF3-(m-MePh)OBnCF3,Me(4,5diPh)BOX8.lcd  
 Method Filename : new.lcm  
 Batch Filename :  
 Vial # : 1-26  
 Injection Volume : 3 uL  
 Date Acquired : 02/03/2017 12:28:51  
 Date Processed : 02/03/2017 13:31:46

Sample Type : Unknown  
 Acquired by : System Administrator  
 Processed by : System Administrator

## <Chromatogram>

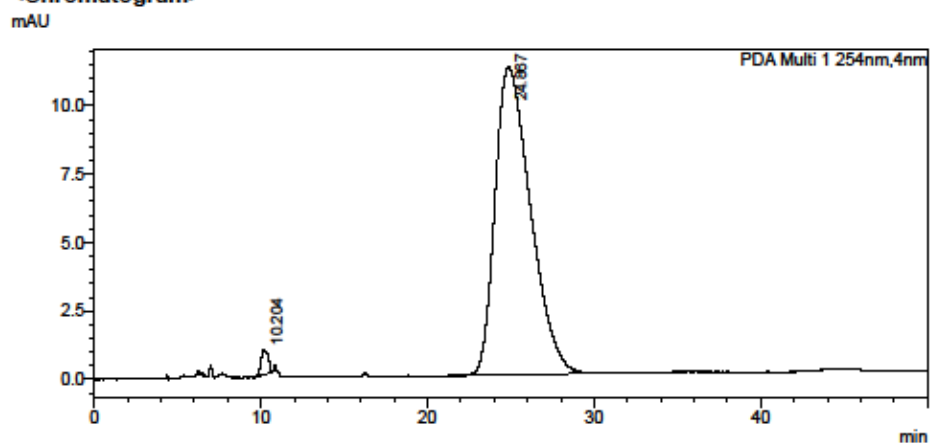

## <Peak Table>

PDA Ch1 254nm

| Peak# | Ret. Time | Area    | Area%   | Height |
|-------|-----------|---------|---------|--------|
| 1     | 10.204    | 26268   | 1.551   | 933    |
| 2     | 24.867    | 1667052 | 98.449  | 11230  |
| Total |           | 1693320 | 100.000 | 12163  |

C:\Andrey\CF3-(m-MePh)OBnCF3,Me(4,5diPh)BOX8.lcd

**Supplementary figure 243.** HPLC chromatogram for compound **6d**, Ligand:(**4S,5R**)-**7a**



# Analysis Report

## <Sample Information>

Sample Name : CF3-(p-MePh)OBnCF3,Me(4,5diPh)BOX  
 Sample ID : CF3-(p-MePh)OBnCF3, Me(4,5diPh)  
 Data Filename : CF3-(p-MePh)OBnCF3,Me(4,5diPh)BOX3.lcd  
 Method Filename : new.lcm  
 Batch Filename :  
 Vial # : 1-24  
 Injection Volume : 2 uL  
 Date Acquired : 13/02/2017 01:58:12  
 Date Processed : 13/02/2017 02:43:09

Sample Type : Unknown  
 Acquired by : System Administrator  
 Processed by : System Administrator

## <Chromatogram>

mAU

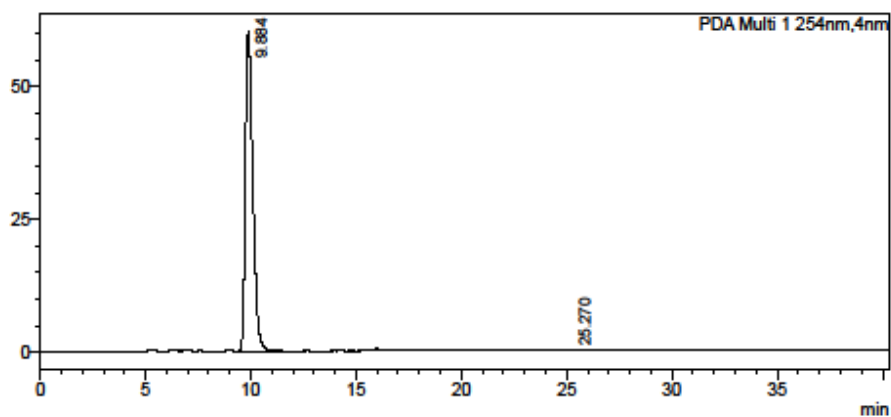

## <Peak Table>

PDA Ch1 254nm

| Peak# | Ret. Time | Area    | Area%   | Height |
|-------|-----------|---------|---------|--------|
| 1     | 9.884     | 1480178 | 98.599  | 60145  |
| 2     | 25.270    | 21038   | 1.401   | 179    |
| Total |           | 1501214 | 100.000 | 60323  |

C:\Andrey\CF3-(p-MePh)OBnCF3,Me(4,5diPh)BOX3.lcd

Supplementary figure 244. HPLC chromatogram for compound **6d**, Ligand:(**4R,5S**)-**7a**

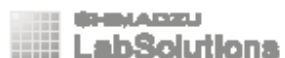

# Analysis Report

## <Sample Information>

Sample Name : CF3(p-MePh)-OBnCF3rac  
 Sample ID : CF3(p-MePh)-OBnCF3rac  
 Data Filename : CF3(p-MePh)-OBnCF3rac5.lcd  
 Method Filename : andrey.lcm  
 Batch Filename :  
 Vial # : 1-51  
 Injection Volume : 8 uL  
 Date Acquired : 29/05/2017 13:22:05  
 Date Processed : 01/06/2017 10:52:36

Sample Type : Unknown  
 Acquired by : System Administrator  
 Processed by : System Administrator

## <Chromatogram>

mAU

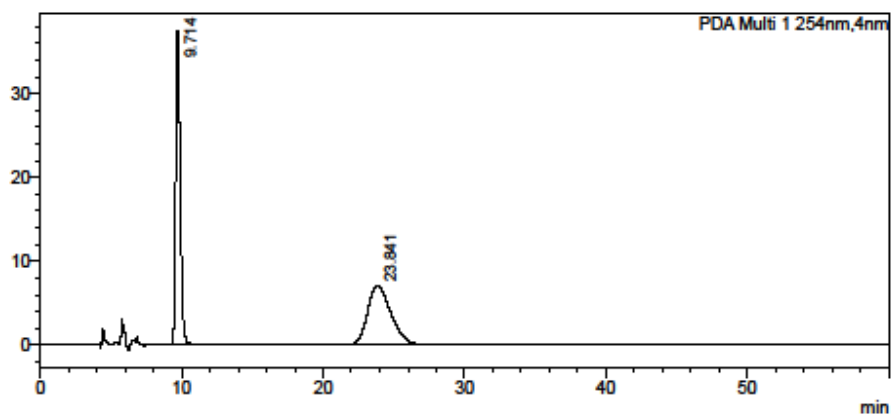

## <Peak Table>

PDA Ch1 254nm

| Peak# | Ret. Time | Area    | Area%   | Height |
|-------|-----------|---------|---------|--------|
| 1     | 9.714     | 828559  | 51.130  | 37325  |
| 2     | 23.841    | 791945  | 48.870  | 6953   |
| Total |           | 1620504 | 100.000 | 44278  |

C:\Andrey\CF3(p-MePh)-OBnCF3rac5.lcd

Supplementary figure 245. HPLC chromatogram for compound **6d**, racemic



# Analysis Report

**<Sample Information>**

Sample Name : CF3-(m-MePh)OBnCF3,Me(4,5diPh)BOX  
 Sample ID : CF3-(mPh)OBnCF3, Me(4,5diPh)BOX  
 Data Filename : CF3-(m-Me-Ph)OBnCF3,Me(4,5diPh)BOX1.lcd  
 Method Filename : new.lcm  
 Batch Filename :  
 Vial # : 1-20  
 Injection Volume : 2 uL  
 Date Acquired : 10/02/2017 03:11:00  
 Date Processed : 10/02/2017 04:01:02

Sample Type : Unknown  
 Acquired by : System Administrator  
 Processed by : System Administrator

**<Chromatogram>**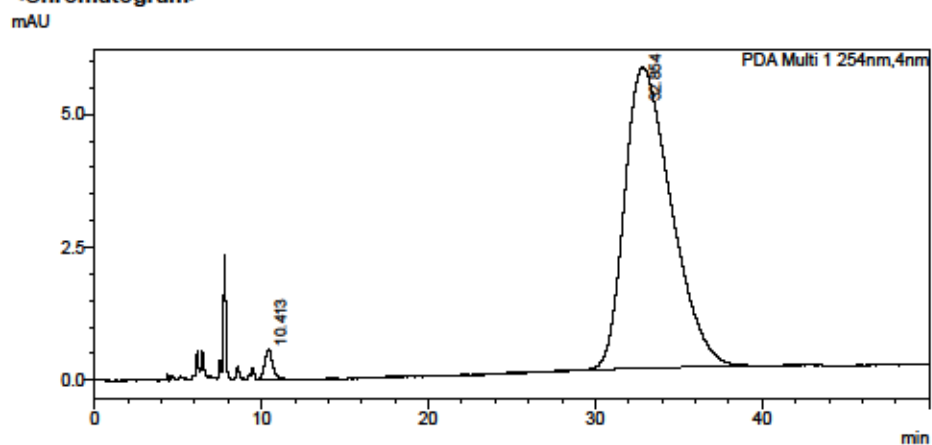**<Peak Table>**

PDA Ch1 254nm

| Peak# | Ret. Time | Area    | Area%   | Height |
|-------|-----------|---------|---------|--------|
| 1     | 10.413    | 17192   | 1.538   | 548    |
| 2     | 32.854    | 1100550 | 98.462  | 5654   |
| Total |           | 1117743 | 100.000 | 6202   |

C:\Andrey\CF3-(m-Me-Ph)OBnCF3,Me(4,5diPh)BOX1.lcd

Supplementary figure 246. HPLC chromatogram for compound **6e**, Ligand:(**4S,5R**)-**7a**

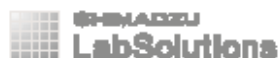

# Analysis Report

## <Sample Information>

Sample Name : CF3-(m-MePh)OBnCF3,Me(4,5diPh)BOX  
 Sample ID : CF3-(mMePh)OBnCF3, Me(4,5diPh)  
 Data Filename : CF3-(m-MePh)OBnCF3,Me(4,5diPh)BOX6.lcd  
 Method Filename : new.lcm  
 Batch Filename :  
 Vial # : 1-26  
 Injection Volume : 3 uL  
 Date Acquired : 01/03/2017 13:00:42  
 Date Processed : 01/03/2017 13:49:28

Sample Type : Unknown  
 Acquired by : System Administrator  
 Processed by : System Administrator

## <Chromatogram>

mAU

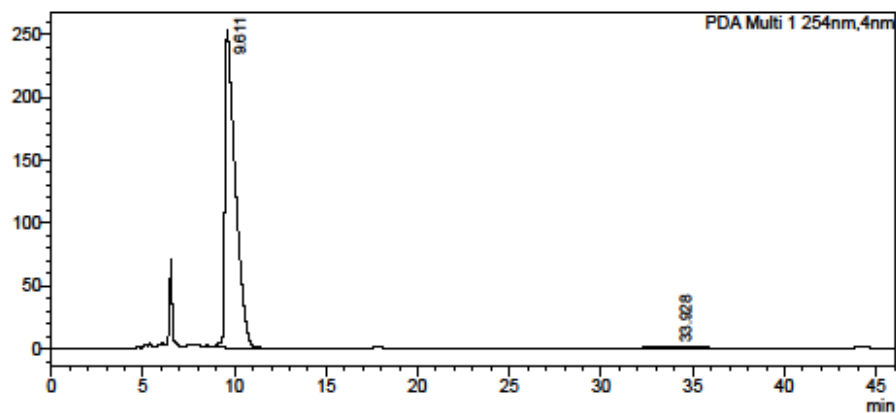

## <Peak Table>

PDA Ch1 254nm

| Peak# | Ret. Time | Area     | Area%   | Height |
|-------|-----------|----------|---------|--------|
| 1     | 9.611     | 9906870  | 97.826  | 251978 |
| 2     | 33.928    | 220185   | 2.174   | 1196   |
| Total |           | 10126854 | 100.000 | 253175 |

C:\Andrey\CF3-(m-MePh)OBnCF3,Me(4,5diPh)BOX6.lcd

Supplementary figure 247. HPLC chromatogram for compound 6e, Ligand:(4R,5S)-7a



# Analysis Report

## <Sample Information>

Sample Name : CF3(m-MePh)-OBnCF3\_rac  
 Sample ID : CF3(m-MePh)-OBnCF3\_rac  
 Data Filename : CF3(m-MePh)-OBnCF3\_rac1.lcd  
 Method Filename : andrey.lcm  
 Batch Filename :  
 Vial # : 1-84  
 Injection Volume : 4 uL  
 Date Acquired : 28/06/2017 13:22:39  
 Date Processed : 30/06/2017 17:25:27

Sample Type : Unknown  
 Acquired by : System Administrator  
 Processed by : System Administrator

## <Chromatogram>

mAU

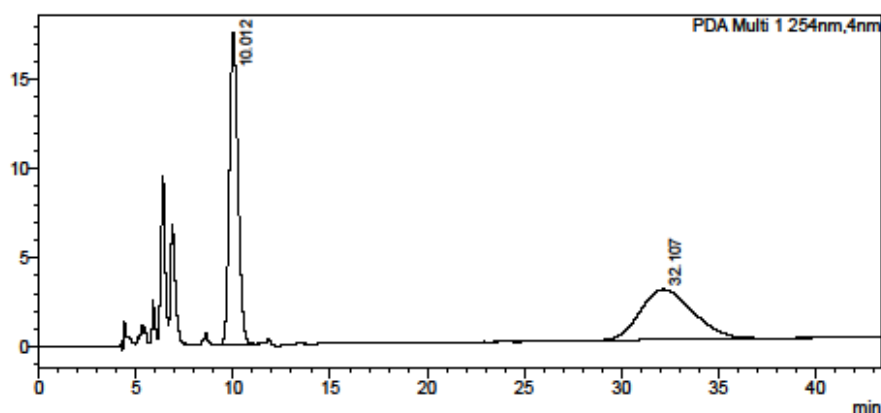

## <Peak Table>

PDA Ch1 254nm

| Peak# | Ret. Time | Area    | Area%   | Height |
|-------|-----------|---------|---------|--------|
| 1     | 10.012    | 532703  | 50.063  | 17420  |
| 2     | 32.107    | 531373  | 49.937  | 2822   |
| Total |           | 1064075 | 100.000 | 20242  |

C:\Andrey\CF3(m-MePh)-OBnCF3\_rac1.lcd

Supplementary figure 248. HPLC chromatogram for compound **6e**, racemic





# Analysis Report

**<Sample Information>**

Sample Name : CF3(o-Me-Ph)-OBnCF3,Me(4,5diPh)BOX  
 Sample ID : CF3(o-MePh)-OBnCF3,Me(4,5diPh)B  
 Data Filename : CF3(oMePh)-OBnCF3,Me(4,5diPh)BOX3.lcd  
 Method Filename : new.lcm  
 Batch Filename :  
 Vial # : 1-28  
 Injection Volume : 4  $\mu$ L  
 Date Acquired : 05/03/2017 15:28:52  
 Date Processed : 06/03/2017 09:12:12

Sample Type : Unknown  
 Acquired by : System Administrator  
 Processed by : System Administrator

**<Chromatogram>**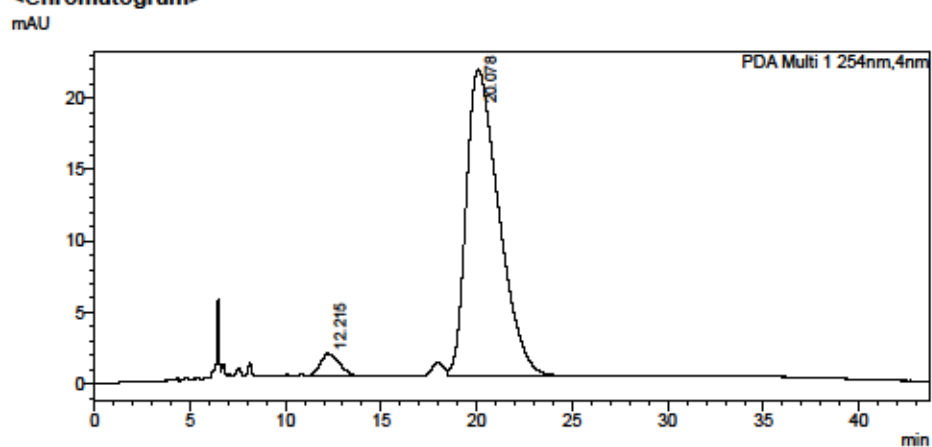**<Peak Table>**

PDA Ch1 254nm

| Peak# | Ret. Time | Area    | Area%   | Height |
|-------|-----------|---------|---------|--------|
| 1     | 12.215    | 103381  | 3.895   | 1547   |
| 2     | 20.078    | 2550599 | 96.105  | 21476  |
| Total |           | 2653980 | 100.000 | 23023  |

C:\Andrey\CF3(oMePh)-OBnCF3,Me(4,5diPh)BOX3.lcd

Supplementary figure 249. HPLC chromatogram for compound **6f**, Ligand:(**4S,5R**)-**7a**



# Analysis Report

**<Sample Information>**

Sample Name : CF3(o-Me)-OBnCF3,Me(4,5diPh)\_BOX  
 Sample ID : CF3(o-Me)-OBnCF3,Me(4,5diPh)\_B  
 Data Filename : CF3(o-Me)-OBnCF3,Me(4,5diPh)\_BOX2.lcd  
 Method Filename : new.lcm  
 Batch Filename :  
 Vial # : 1-34  
 Injection Volume : 2 uL  
 Date Acquired : 14/03/2017 17:39:00  
 Date Processed : 22/03/2017 19:19:21

Sample Type : Unknown  
 Acquired by : System Administrator  
 Processed by : System Administrator

**<Chromatogram>**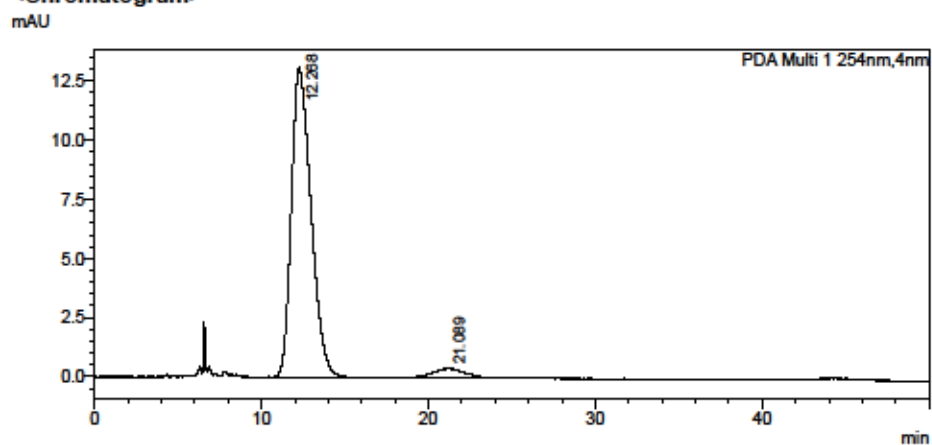**<Peak Table>**

PDA Ch1 254nm

| Peak# | Ret. Time | Area    | Area%   | Height |
|-------|-----------|---------|---------|--------|
| 1     | 12.268    | 1065882 | 96.220  | 13088  |
| 2     | 21.089    | 41872   | 3.780   | 352    |
| Total |           | 1107754 | 100.000 | 13440  |

C:\Andrey\CF3(o-Me)-OBnCF3,Me(4,5diPh)\_BOX2.lcd

Supplementary figure 250. HPLC chromatogram for compound **6f**, Ligand: **(4R,5S)-7a**



# Analysis Report

## <Sample Information>

Sample Name : CF3(oMe-Ph)OBnCF3 rac  
 Sample ID : CF3(oMe-Ph)OBnCF3 rac  
 Data Filename : CF3(oMe-Ph)OBnCF3 rac3.lcd  
 Method Filename : andrey.lcm  
 Batch Filename :  
 Vial # : 1-91  
 Injection Volume : 2 uL  
 Date Acquired : 14/08/2017 11:16:34  
 Date Processed : 14/08/2017 12:04:44

Sample Type : Unknown  
 Acquired by : System Administrator  
 Processed by : System Administrator

## <Chromatogram>

mAU

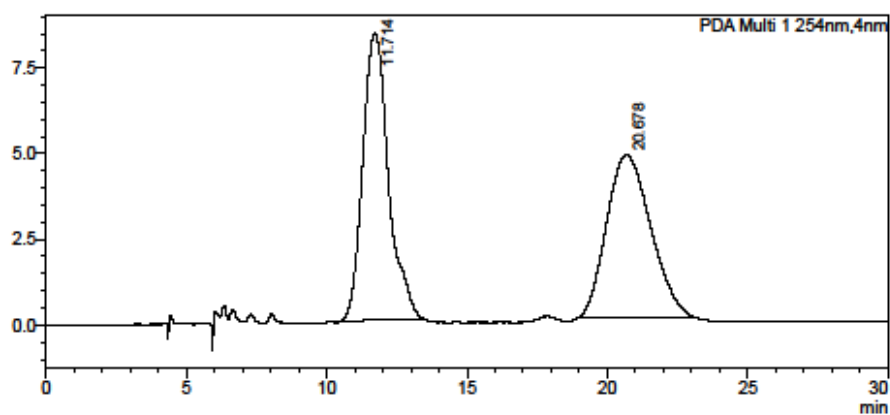

## <Peak Table>

PDA Ch1 254nm

| Peak# | Ret. Time | Area    | Area%   | Height |
|-------|-----------|---------|---------|--------|
| 1     | 11.714    | 536885  | 50.819  | 8374   |
| 2     | 20.678    | 519579  | 49.181  | 4739   |
| Total |           | 1056464 | 100.000 | 13113  |

C:\Andrey\CF3(oMe-Ph)OBnCF3 rac3.lcd

Supplementary figure 251. HPLC chromatogram for compound **6f**, racemic



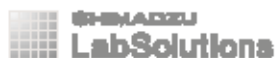

# Analysis Report

## <Sample Information>

Sample Name : CF3-(m-MeSPh)OBnCF3,Me(4,5diPh)BOX  
 Sample ID : CF3-(mMeSPh)OBnCF3, Me(4,5diPh)  
 Data Filename : CF3-(m-MeSPh)OBnCF3,Me(4,5diPh)BOX4.lcd  
 Method Filename : new.lcm  
 Batch Filename :  
 Vial # : 1-25  
 Injection Volume : 3 uL  
 Date Acquired : 13/02/2017 04:02:40  
 Date Processed : 13/02/2017 04:34:07

Sample Type : Unknown  
 Acquired by : System Administrator  
 Processed by : System Administrator

## <Chromatogram>

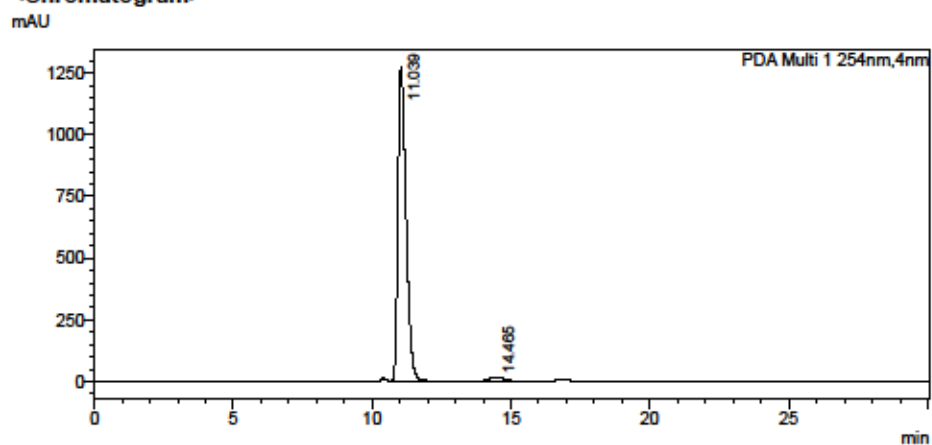

## <Peak Table>

PDA Ch1 254nm

| Peak# | Ret. Time | Area     | Area%   | Height  |
|-------|-----------|----------|---------|---------|
| 1     | 11.039    | 25923074 | 97.728  | 1270475 |
| 2     | 14.465    | 602792   | 2.272   | 16467   |
| Total |           | 26525866 | 100.000 | 1286942 |

C:\Andrey\CF3-(m-MeSPh)OBnCF3,Me(4,5diPh)BOX4.lcd

Supplementary figure 253. HPLC chromatogram for compound **6g**, Ligand:(**4R,5S**)-**7a**

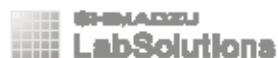

# Analysis Report

## <Sample Information>

Sample Name : CF3(m-MeSPh)OBnCF3 \_rac  
 Sample ID : CF3(m-MeSPh)OBnCF3 \_rac  
 Data Filename : CF3(m-MeSPh)OBnCF3 \_rac2.lcd  
 Method Filename : andrey.lcm  
 Batch Filename :  
 Vial # : 1-04  
 Injection Volume : 1 uL  
 Date Acquired : 18/08/2017 15:34:17  
 Date Processed : 21/08/2017 17:21:04

Sample Type : Unknown  
 Acquired by : System Administrator  
 Processed by : System Administrator

## <Chromatogram>

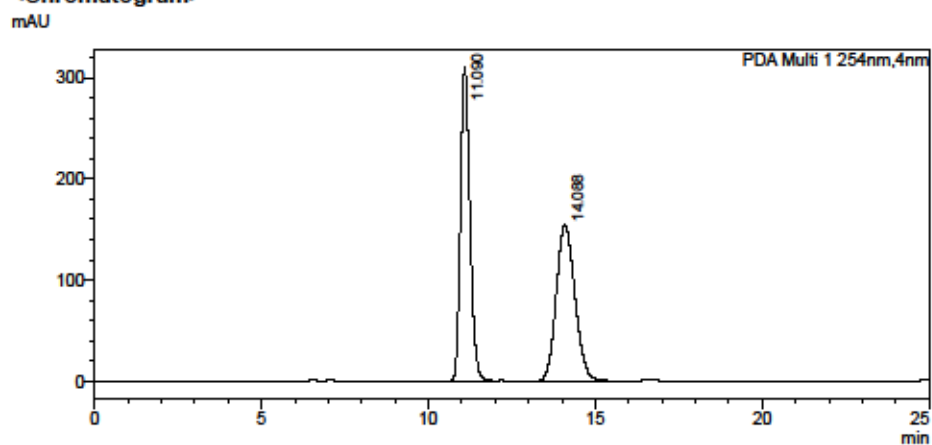

## <Peak Table>

PDA Ch1 254nm

| Peak# | Ret. Time | Area     | Area%   | Height |
|-------|-----------|----------|---------|--------|
| 1     | 11.090    | 8085880  | 50.206  | 309750 |
| 2     | 14.088    | 8036038  | 49.794  | 154163 |
| Total |           | 12121918 | 100.000 | 463913 |

C:\Andrey\CF3(m-MeSPh)OBnCF3 \_rac2.lcd

Supplementary figure 254. HPLC chromatogram for compound **6g**, racemic



# Analysis Report

## <Sample Information>

Sample Name : CF3(m-OCF3Ph)-OBnCF3 (diPh)BOX old  
 Sample ID : CF3(m-OCF3Ph)-OBnCF3 (diPh)BOX  
 Data Filename : CF3(m-OCF3Ph)-OBnCF3 (diPh)BOX old1.lcd  
 Method Filename : andrey.lcm  
 Batch Filename :  
 Vial # : 1-56  
 Injection Volume : 5 uL  
 Date Acquired : 05/08/2017 18:50:14  
 Date Processed : 21/08/2017 15:28:34

Sample Type : Unknown  
 Acquired by : System Administrator  
 Processed by : System Administrator

## <Chromatogram>

mAU

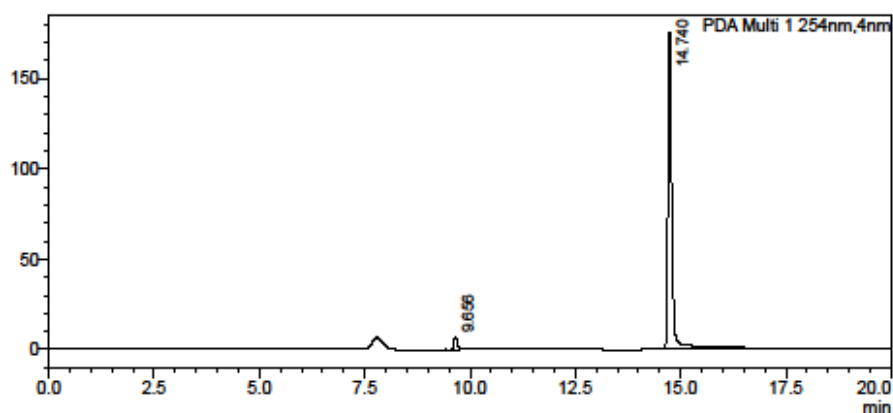

## <Peak Table>

PDA Ch1 254nm

| Peak# | Ret. Time | Area    | Area%   | Height |
|-------|-----------|---------|---------|--------|
| 1     | 9.656     | 48496   | 4.051   | 6901   |
| 2     | 14.740    | 1148754 | 95.949  | 175108 |
| Total |           | 1197250 | 100.000 | 182009 |

C:\Andrey\CF3(m-OCF3Ph)-OBnCF3 (diPh)BOX old1.lcd

Supplementary figure 255. HPLC chromatogram for compound **6h**, Ligand:(**4S,5R**)-**7a**



# Analysis Report

## <Sample Information>

Sample Name : CF3(m-CF3O-Ph)-OBnCF3,Me(4,5diPh)BOX  
 Sample ID : CF3(m-CF3O-Ph)-OBnCF3,Me(4,5diP  
 Data Filename : CF3(m-CF3O-Ph)-OBnCF3,Me(4,5diPh)BOX5.lcd  
 Method Filename : new.lcm  
 Batch Filename :  
 Vial # : 1-29  
 Injection Volume : 4 uL  
 Date Acquired : 07/03/2017 17:38:52  
 Date Processed : 08/03/2017 13:21:07

Sample Type : Unknown  
 Acquired by : System Administrator  
 Processed by : System Administrator

## <Chromatogram>

mAU

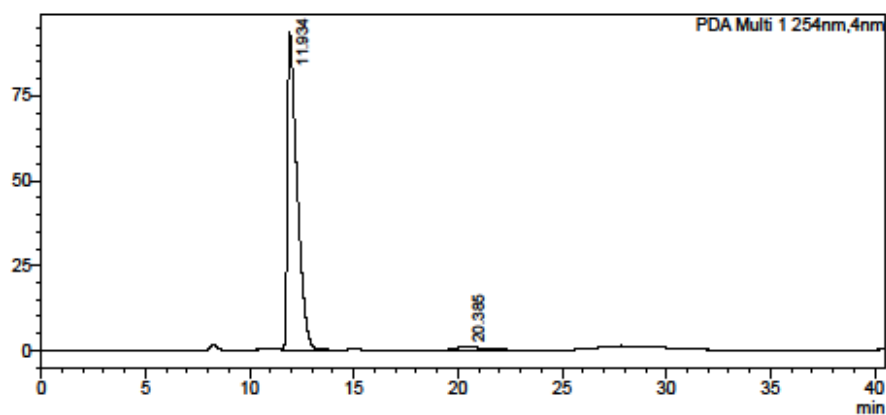

## <Peak Table>

PDA Ch1 254nm

| Peak# | Ret. Time | Area    | Area%   | Height |
|-------|-----------|---------|---------|--------|
| 1     | 11.934    | 3016018 | 96.838  | 93438  |
| 2     | 20.385    | 98478   | 3.162   | 1093   |
| Total |           | 3114496 | 100.000 | 94531  |

C:\Andrey\CF3(m-CF3O-Ph)-OBnCF3,Me(4,5diPh)BOX5.lcd

Supplementary figure 256. HPLC chromatogram for compound 6h, Ligand:(4R,5S)-7a





# Analysis Report

## <Sample Information>

Sample Name : CF3(m-OCF3)-OBnCF3 rac  
 Sample ID : CF3(m-OCF3)-OBnCF3 rac  
 Data Filename : CF3(m-OCF3)-OBnCF3 rac4.lcd  
 Method Filename : andrey.lcm  
 Batch Filename :  
 Vial # : 1-64  
 Injection Volume : 2 uL  
 Date Acquired : 06/07/2017 20:11:48  
 Date Processed : 09/07/2017 10:37:24

Sample Type : Unknown  
 Acquired by : System Administrator  
 Processed by : System Administrator

## <Chromatogram>

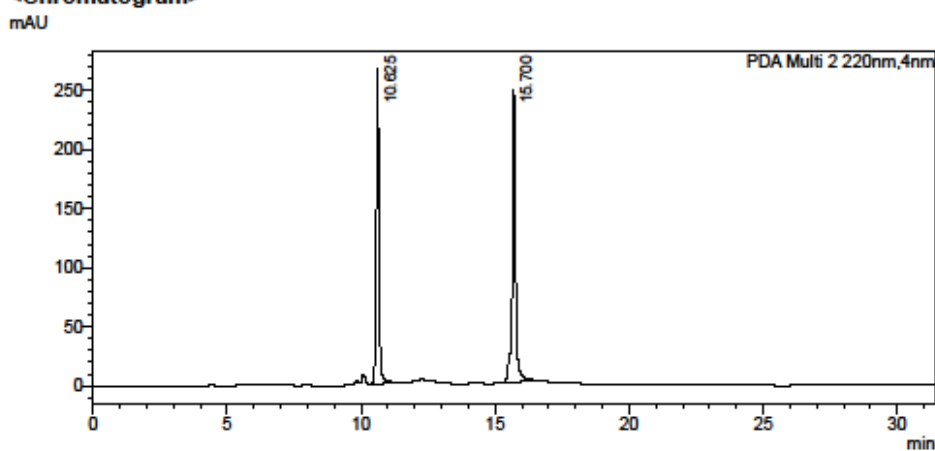

## <Peak Table>

PDA Ch2 220nm

| Peak# | Ret. Time | Area    | Area%   | Height |
|-------|-----------|---------|---------|--------|
| 1     | 10.625    | 1856527 | 46.387  | 265953 |
| 2     | 15.700    | 2145722 | 53.613  | 247095 |
| Total |           | 4002250 | 100.000 | 513048 |

C:\Andrey\CF3(m-OCF3)-OBnCF3 rac4.lcd

Supplementary figure 257. HPLC chromatogram for compound **6h**, racemic



# Analysis Report

## <Sample Information>

Sample Name : CF3-(2-Napht)OBnCF3, 4.5diPhMEBOX  
 Sample ID : CF3-(2-Napht)OBnCF3, 4.5diPhMEBOX  
 Data Filename : CF3-(2-Napht)OBnCF3, 4.5diPhMEBOX2.lcd  
 Method Filename : new.lcm  
 Batch Filename :  
 Vial # : 1-4  
 Injection Volume : 2 uL  
 Date Acquired : 11/01/2017 16:34:54  
 Date Processed : 21/08/2017 15:22:12

Sample Type : Unknown  
 Acquired by : System Administrator  
 Processed by : System Administrator

## <Chromatogram>

mAU

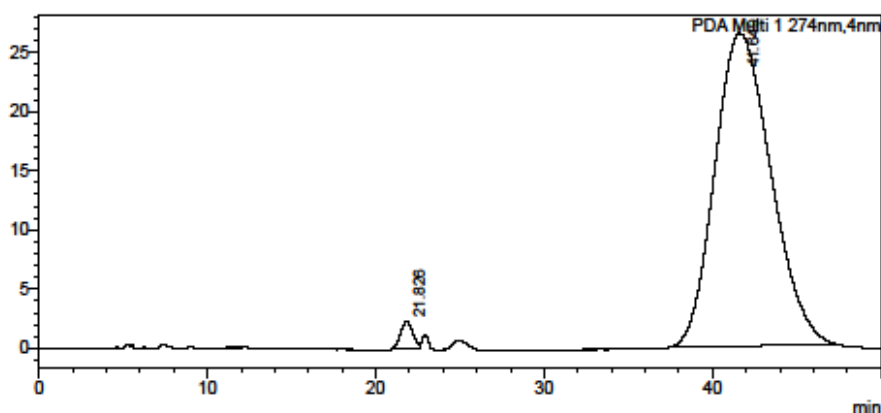

## <Peak Table>

PDA Ch1 274nm

| Peak# | Ret. Time | Area    | Area%   | Height |
|-------|-----------|---------|---------|--------|
| 1     | 21.826    | 122036  | 1.952   | 2372   |
| 2     | 41.649    | 6130344 | 98.048  | 26421  |
| Total |           | 6252380 | 100.000 | 28793  |

C:\Andrey\CF3-(2-Napht)OBnCF3, 4.5diPhMEBOX2.lcd

Supplementary figure 258. HPLC chromatogram for compound **6i**, Ligand:(**4S,5R**)-7a

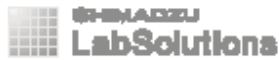

# Analysis Report

## <Sample Information>

Sample Name : CF3(2-Napht)-OBnCF3,Me(4.5diPh) old  
 Sample ID : CF3(2-Napht)-OBnCF3,Me(4.5diPh)  
 Data Filename : CF3(2-Napht)-OBnCF3,Me(4.5diPh) old1.lcd  
 Method Filename : andrey.lcm  
 Batch Filename :  
 Vial # : 1-41  
 Injection Volume : 5 uL  
 Date Acquired : 20/04/2017 18:44:57  
 Date Processed : 20/04/2017 18:07:47

Sample Type : Unknown  
 Acquired by : System Administrator  
 Processed by : System Administrator

## <Chromatogram>

mAU

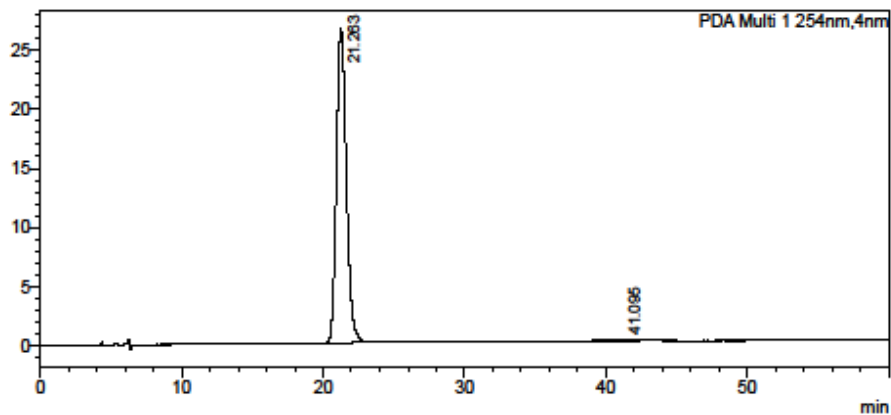

## <Peak Table>

PDA Ch1 254nm

| Peak# | Ret. Time | Area    | Area%   | Height |
|-------|-----------|---------|---------|--------|
| 1     | 21.263    | 1289315 | 97.956  | 26502  |
| 2     | 41.085    | 26909   | 2.044   | 151    |
| Total |           | 1316224 | 100.000 | 26652  |

C:\Andrey\CF3(2-Napht)-OBnCF3,Me(4.5diPh) old1.lcd

Supplementary figure 259. HPLC chromatogram for compound **6i**, Ligand:(**4R,5S**)-**7a**



# Analysis Report

## <Sample Information>

Sample Name : CF3(napht)-OBnCF3\_rac  
 Sample ID : CF3(napht)-OBnCF3\_rac  
 Data Filename : CF3(napht)-OBnCF3\_rac2.lcd  
 Method Filename : shutdown.lcm  
 Batch Filename :  
 Vial # : 1-81  
 Injection Volume : 2 uL  
 Date Acquired : 06/07/2017 12:35:37  
 Date Processed : 09/07/2017 10:02:37

Sample Type : Unknown  
 Acquired by : System Administrator  
 Processed by : System Administrator

## <Chromatogram>

mAU

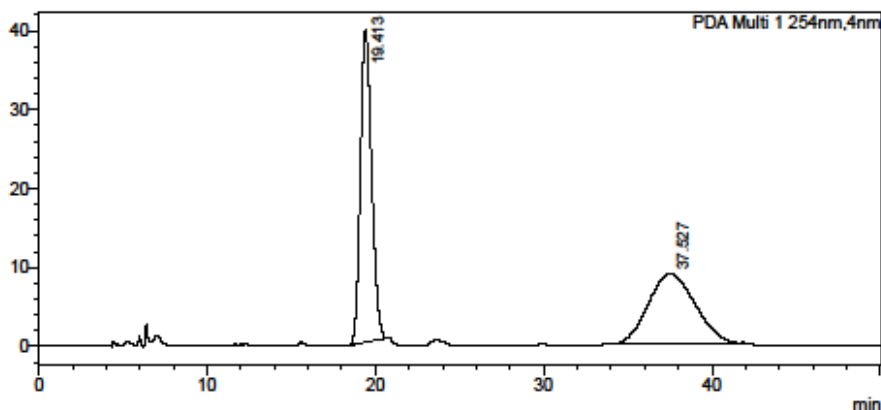

## <Peak Table>

PDA Ch1 254nm

| Peak# | Ret. Time | Area    | Area%   | Height |
|-------|-----------|---------|---------|--------|
| 1     | 19.413    | 1850403 | 51.784  | 39514  |
| 2     | 37.527    | 1722902 | 48.216  | 8829   |
| Total |           | 3573305 | 100.000 | 48343  |

C:\Andrey\CF3(napht)-OBnCF3\_rac2.lcd

Supplementary figure 260. HPLC chromatogram for compound **6i**, racemic



# Analysis Report

## <Sample Information>

Sample Name : CF3-(p-vinPh)OBnCF3, 4.5diPhMEBOX  
 Sample ID : CF3-(p-vPh)OBnCF3, 4.5diPhMEBOX  
 Data Filename : CF3-(p-vinPh)OBnCF3, 4.5diPhMEBOX6.lcd  
 Method Filename : new.lcm  
 Batch Filename :  
 Vial # : 1-3  
 Injection Volume : 2 uL  
 Date Acquired : 05/01/2017 19:36:13  
 Date Processed : 22/08/2017 15:18:35

Sample Type : Unknown  
 Acquired by : System Administrator  
 Processed by : System Administrator

## <Chromatogram>

mAU

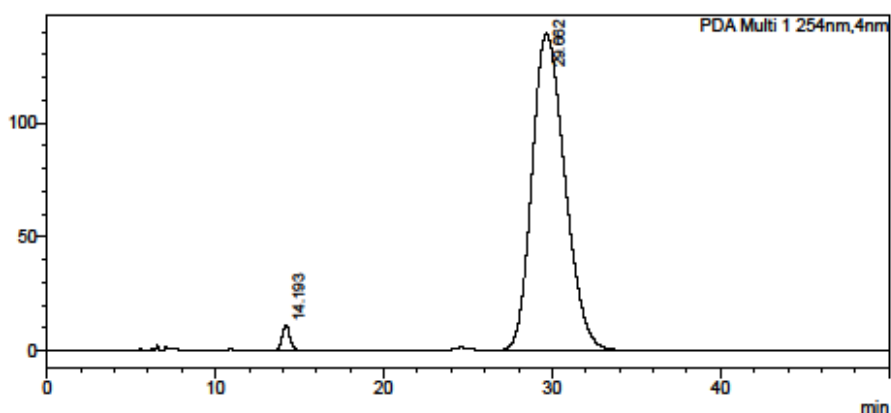

## <Peak Table>

PDA Ch1 254nm

| Peak# | Ret. Time | Area     | Area%   | Height |
|-------|-----------|----------|---------|--------|
| 1     | 14.193    | 347576   | 1.807   | 11003  |
| 2     | 29.662    | 18892586 | 98.193  | 139231 |
| Total |           | 19240162 | 100.000 | 150234 |

C:\Andrey\CF3-(p-vinPh)OBnCF3, 4.5diPhMEBOX6.lcd

Supplementary figure 261. HPLC chromatogram for compound **6j**, Ligand:(**4S,5R**)-**7a**



# Analysis Report

## <Sample Information>

Sample Name : CF3(vinPh)-OBnCF3, 4.5diPhBOXold  
 Sample ID : CF3(vinPh)-OBnCF3, 4.5diPhBOXol  
 Data Filename : CF3(vinPh)-OBnCF3, 4.5diPhBOXold2.lcd  
 Method Filename : andrey.lcm  
 Batch Filename :  
 Vial # : 1-45  
 Injection Volume : 4 uL  
 Date Acquired : 07/05/2017 14:46:42  
 Date Processed : 09/05/2017 18:50:42

Sample Type : Unknown  
 Acquired by : System Administrator  
 Processed by : System Administrator

## <Chromatogram>

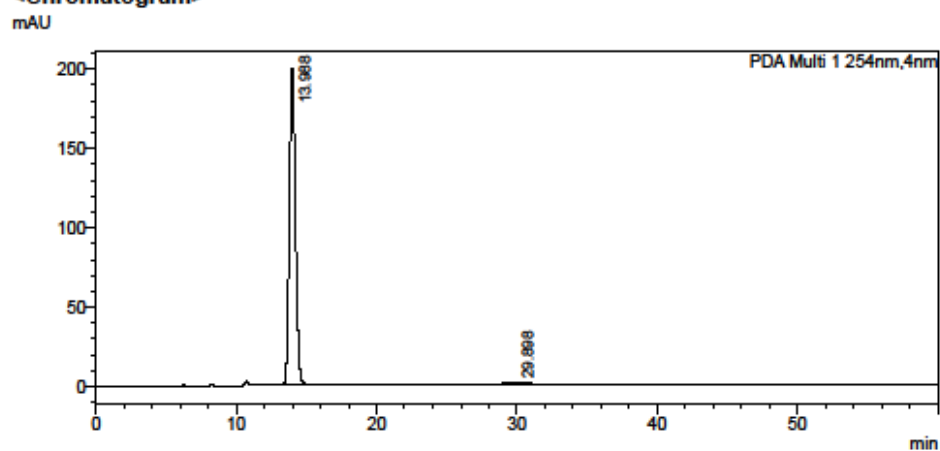

## <Peak Table>

PDA.Ch1 254nm

| Peak# | Ret. Time | Area    | Area%   | Height |
|-------|-----------|---------|---------|--------|
| 1     | 13.988    | 5962161 | 97.209  | 199085 |
| 2     | 29.898    | 171204  | 2.791   | 1358   |
| Total |           | 6133366 | 100.000 | 200443 |

C:\Andrey\CF3(vinPh)-OBnCF3, 4.5diPhBOXold2.lcd

Supplementary figure 262. HPLC chromatogram for compound **6j**, Ligand:(**4R,5S**)-**7a**

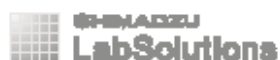

# Analysis Report

## <Sample Information>

Sample Name : CF3(4-vinPh)OBnCF3\_rac  
 Sample ID : CF3(4-vinPh)OBnCF3\_rac  
 Data Filename : CF3(4-vinPh)OBnCF3\_rac2.lcd  
 Method Filename : andrey.lcm  
 Batch Filename :  
 Vial # : 1-09  
 Injection Volume : 1 uL  
 Date Acquired : 22/08/2017 15:41:07  
 Date Processed : 22/08/2017 19:05:41

Sample Type : Unknown  
 Acquired by : System Administrator  
 Processed by : System Administrator

## <Chromatogram>

mAU

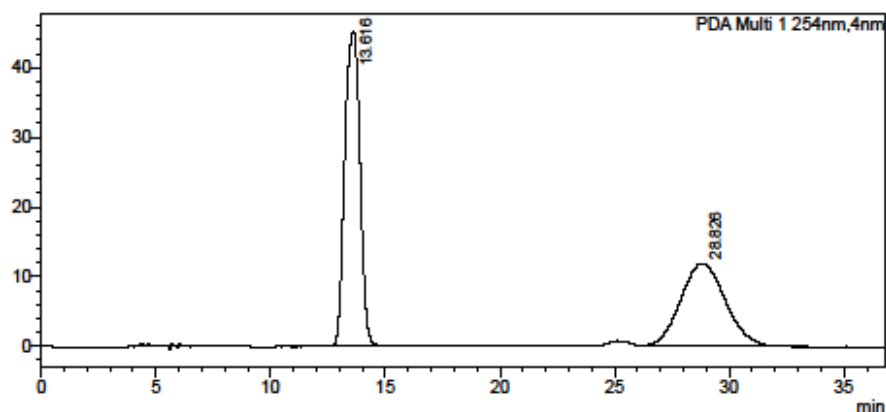

## <Peak Table>

PDA Ch1 254nm

| Peak# | Ret. Time | Area    | Area%   | Height |
|-------|-----------|---------|---------|--------|
| 1     | 13.616    | 1688408 | 50.805  | 40408  |
| 2     | 28.828    | 1634886 | 49.195  | 11960  |
| Total |           | 3323292 | 100.000 | 52368  |

C:\Andrey\CF3(4-vinPh)OBnCF3\_rac2.lcd

Supplementary figure 263. HPLC chromatogram for compound **6j**, racemic

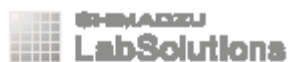

# Analysis Report

## <Sample Information>

Sample Name : CF3(3-(1,3-dioxalen-2-yl)Ph)OBnCF3  
 Sample ID : CF3(3-(1,3-dioxalen-2-yl)Ph)OBn  
 Data Filename : CF3(3-(1,3-dioxalen-2-yl)Ph)OBnCF3\_\_4.lcd  
 Method Filename : andrey.lcm  
 Batch Filename :  
 Vial # : 1-84  
 Injection Volume : 2 uL  
 Date Acquired : 07/05/2018 15:54:22  
 Date Processed : 07/05/2018 16:38:16  
 Sample Type : Unknown  
 Acquired by : System Administrator  
 Processed by : System Administrator

## <Chromatogram>

mAU

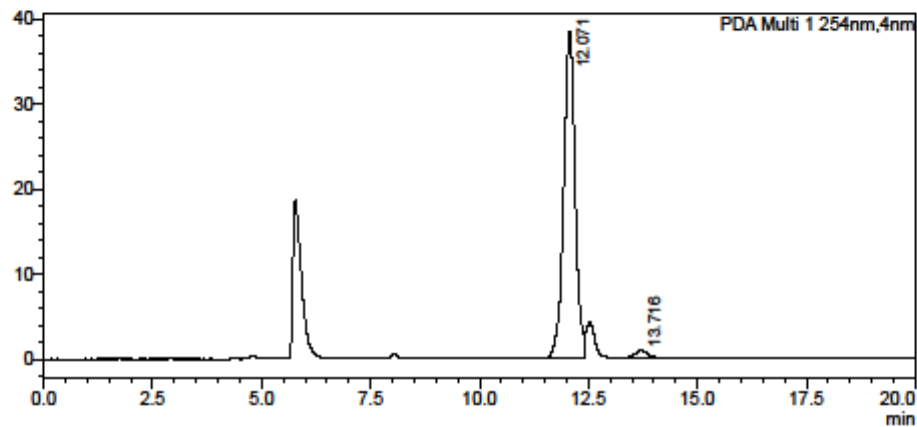

## <Peak Table>

PDA Ch1 254nm

| Peak# | Ret. Time | Area   | Area%   | Height |
|-------|-----------|--------|---------|--------|
| 1     | 12.071    | 694846 | 97.307  | 38253  |
| 2     | 13.716    | 19232  | 2.693   | 890    |
| Total |           | 714078 | 100.000 | 39143  |

C:\Andrey\CF3(3-(1,3-dioxalen-2-yl)Ph)OBnCF3\_\_4.lcd

Supplementary figure 264. HPLC chromatogram for compound 6k, Ligand:(4R,5S)-7a





# Analysis Report

## <Sample Information>

Sample Name : CF3(3-(1,3-dioxalen-2-yl)Ph)OBnCF3  
 Sample ID : CF3(3-(1,3-dioxalen-2-yl)Ph)OBn  
 Data Filename : CF3(3-(1,3-dioxalen-2-yl)Ph)OBnCF3\_1.lcd  
 Method Filename : andrey.lcm  
 Batch Filename :  
 Vial # : 1-87  
 Injection Volume : 2 uL  
 Date Acquired : 28/04/2018 19:51:09  
 Date Processed : 07/05/2018 16:35:13

Sample Type : Unknown  
 Acquired by : System Administrator  
 Processed by : System Administrator

## <Chromatogram>

mAU

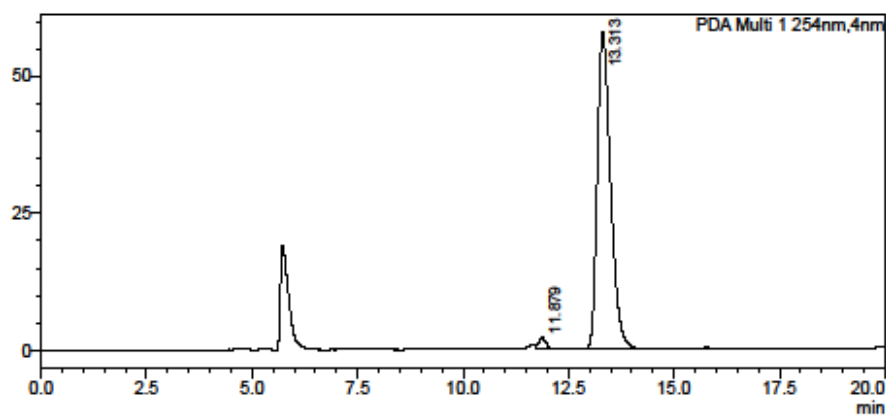

## <Peak Table>

PDA Ch1 254nm

| Peak# | Ret. Time | Area    | Area%   | Height |
|-------|-----------|---------|---------|--------|
| 1     | 11.879    | 26818   | 2.081   | 2059   |
| 2     | 13.313    | 1261879 | 97.919  | 57682  |
| Total |           | 1288697 | 100.000 | 59741  |

C:\Andrey\CF3(3-(1,3-dioxalen-2-yl)Ph)OBnCF3\_1.lcd

Supplementary figure 265. HPLC chromatogram for compound 6k, Ligand:(4S,5R)-7a

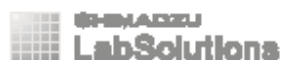

# Analysis Report

## <Sample Information>

Sample Name : CF3(3-(1,3-dioxalen-2-yl)Ph)OBnCF3  
 Sample ID : CF3(3-(1,3-dioxalen-2-yl)Ph)OBn  
 Data Filename : CF3(3-(1,3-dioxalen-2-yl)Ph)OBnCF3\_\_1.lcd  
 Method Filename : andrey.lcm  
 Batch Filename :  
 Vial # : 1-79  
 Injection Volume : 2 uL  
 Date Acquired : 06/05/2018 14:37:50  
 Date Processed : 07/05/2018 16:37:14

Sample Type : Unknown  
 Acquired by : System Administrator  
 Processed by : System Administrator

## <Chromatogram>

mAU

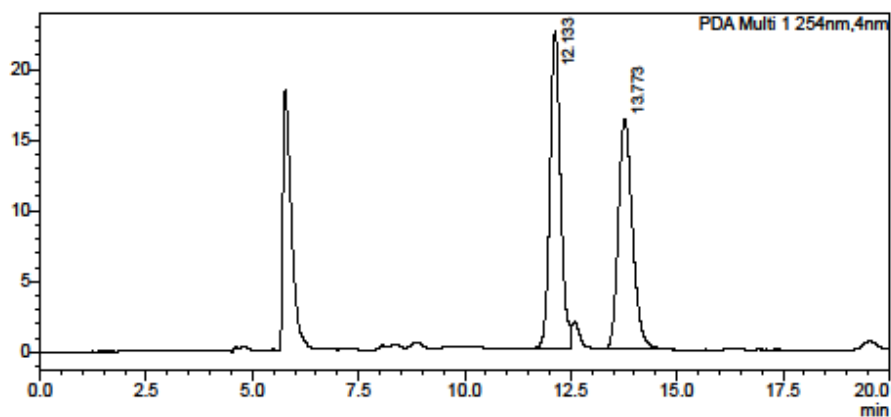

## <Peak Table>

PDA Ch1 254nm

| Peak# | Ret. Time | Area   | Area%   | Height |
|-------|-----------|--------|---------|--------|
| 1     | 12.133    | 386366 | 50.557  | 22416  |
| 2     | 13.773    | 377848 | 49.443  | 16329  |
| Total |           | 764215 | 100.000 | 38745  |

C:\Andrey\CF3(3-(1,3-dioxalen-2-yl)Ph)OBnCF3\_\_1.lcd

Supplementary figure 266. HPLC chromatogram for compound 6k, Ligand: racemic

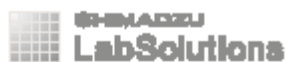

# Analysis Report

## <Sample Information>

Sample Name : CF3(m-CO2MePh)OBnCF3  
 Sample ID : CF3(m-CO2MePh)OBnCF3  
 Data Filename : CF3(m-CO2MePh)OBnCF3\_r6.lcd  
 Method Filename : andrey.lcm  
 Batch Filename :  
 Vial # : 1-99  
 Injection Volume : 1 uL  
 Date Acquired : 23/05/2018 15:35:24  
 Date Processed : 23/05/2018 20:18:50

Sample Type : Unknown  
 Acquired by : System Administrator  
 Processed by : System Administrator

## <Chromatogram>

mAU

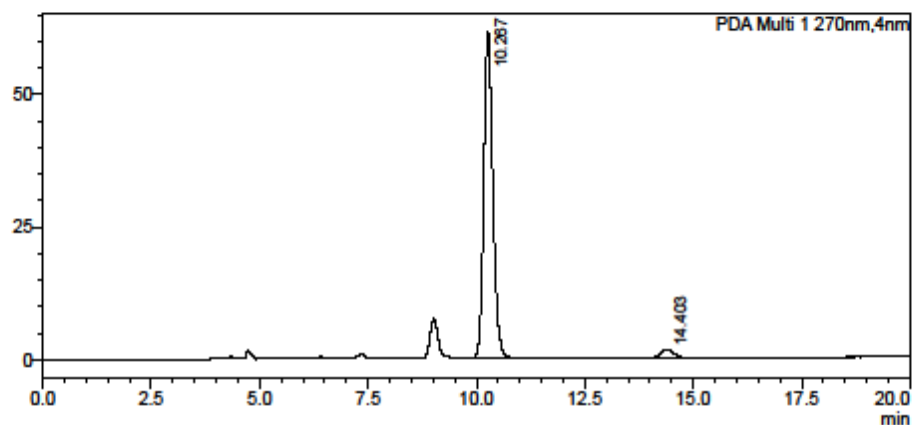

## <Peak Table>

PDA Ch1 270nm

| Peak# | Ret. Time | Area   | Area%   | Height |
|-------|-----------|--------|---------|--------|
| 1     | 10.267    | 886989 | 98.662  | 61283  |
| 2     | 14.403    | 30630  | 3.338   | 1506   |
| Total |           | 917619 | 100.000 | 62789  |

C:\Andrey\CF3(m-CO2MePh)OBnCF3\_r6.lcd

Supplementary figure 267. HPLC chromatogram for compound 6m, Ligand: Ligand:(4R,5S)-7a

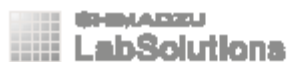

# Analysis Report

## <Sample Information>

Sample Name : CF3(m-CO2MePh)OBnCF3  
 Sample ID : CF3(m-CO2MePh)OBnCF3  
 Data Filename : CF3(m-CO2MePh)OBnCF3\_s5.lcd  
 Method Filename : andrey.lcm  
 Batch Filename :  
 Vial # : 1-100  
 Injection Volume : 1 uL  
 Date Acquired : 23/05/2018 15:05:34  
 Date Processed : 23/05/2018 20:16:47

Sample Type : Unknown  
 Acquired by : System Administrator  
 Processed by : System Administrator

## <Chromatogram>

mAU

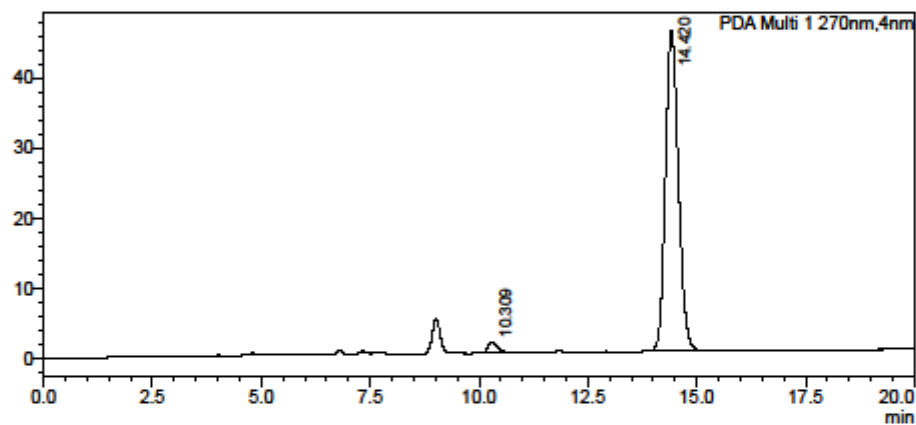

## <Peak Table>

PDA Ch1 270nm

| Peak# | Ret. Time | Area   | Area%   | Height |
|-------|-----------|--------|---------|--------|
| 1     | 10.309    | 25902  | 2.666   | 1665   |
| 2     | 14.420    | 945834 | 97.334  | 45633  |
| Total |           | 971736 | 100.000 | 47299  |

C:\Andrey\CF3(m-CO2MePh)OBnCF3\_s5.lcd

Supplementary figure 268. HPLC chromatogram for compound **6m**, Ligand: Ligand:(**4S,5R**)-**7a**

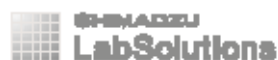

# Analysis Report

## <Sample Information>

Sample Name : CF3(m-CO2MePh)OBnCF3  
 Sample ID : CF3(m-CO2MePh)OBnCF3  
 Data Filename : CF3(m-CO2MePh)OBnCF3\_rac1.lcd  
 Method Filename : andrey.lcm  
 Batch Filename :  
 Vial # : 1-101  
 Injection Volume : 1 uL  
 Date Acquired : 23/05/2018 15:58:07  
 Date Processed : 23/05/2018 20:19:25

Sample Type : Unknown  
 Acquired by : System Administrator  
 Processed by : System Administrator

## <Chromatogram>

mAU

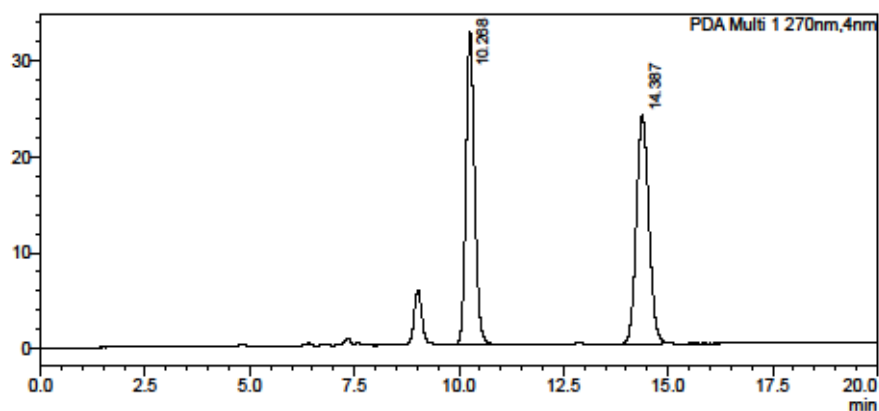

## <Peak Table>

PDA Ch1 270nm

| Peak# | Ret. Time | Area   | Area%   | Height |
|-------|-----------|--------|---------|--------|
| 1     | 10.268    | 468728 | 48.745  | 32652  |
| 2     | 14.387    | 492868 | 51.255  | 23883  |
| Total |           | 961596 | 100.000 | 56535  |

C:\Andrey\CF3(m-CO2MePh)OBnCF3\_rac1.lcd

**Supplementary figure 269.** HPLC chromatogram for compound **6m**, Ligand: racemic

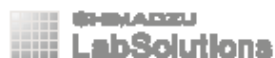

# Analysis Report

## <Sample Information>

Sample Name : CF3(p-Me2NPh)OBnCF3  
 Sample ID : CF3(p-Me2NPh)OBnCF3  
 Data Filename : CF3(p-Me2NPh)OBnCF3\_r6.lcd  
 Method Filename : andrey.lcm  
 Batch Filename :  
 Vial # : 1-99  
 Injection Volume : 1 uL  
 Date Acquired : 27/05/2018 13:33:40  
 Date Processed : 27/05/2018 20:05:10

Sample Type : Unknown  
 Acquired by : System Administrator  
 Processed by : System Administrator

## <Chromatogram>

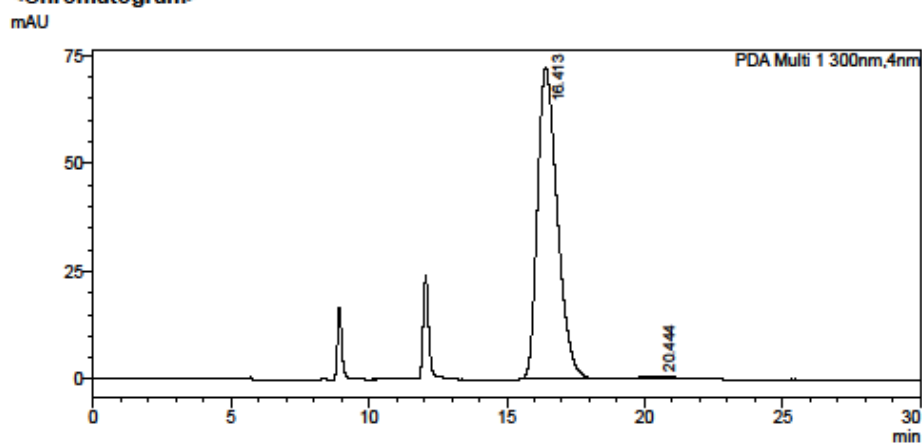

## <Peak Table>

PDA Ch1 300nm

| Peak# | Ret. Time | Area    | Area%   | Height |
|-------|-----------|---------|---------|--------|
| 1     | 16.413    | 3612026 | 98.151  | 72168  |
| 2     | 20.444    | 68055   | 1.849   | 824    |
| Total |           | 3680081 | 100.000 | 72992  |

C:\Andrey\CF3(p-Me2NPh)OBnCF3\_r6.lcd

Supplementary figure 270. HPLC chromatogram for compound **6n**, Ligand: Ligand:(**4R,5S**)-**7a**

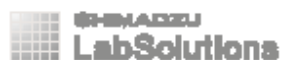

# Analysis Report

## <Sample Information>

Sample Name : CF3(p-Me2NPh)OBnCF3  
 Sample ID : CF3(p-Me2NPh)OBnCF3  
 Data Filename : CF3(p-Me2NPh)OBnCF3\_s2.lcd  
 Method Filename : andrey.lcm  
 Batch Filename :  
 Vial # : 1-100  
 Injection Volume : 1 uL  
 Date Acquired : 27/05/2018 11:23:21  
 Date Processed : 27/05/2018 20:03:56

Sample Type : Unknown  
 Acquired by : System Administrator  
 Processed by : System Administrator

## <Chromatogram>

mAU

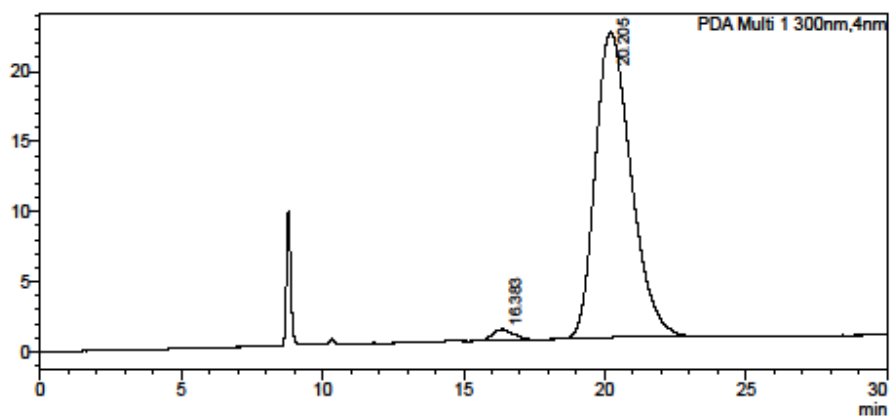

## <Peak Table>

PDA Ch1 300nm

| Peak# | Ret. Time | Area    | Area%   | Height |
|-------|-----------|---------|---------|--------|
| 1     | 16.383    | 34524   | 1.770   | 724    |
| 2     | 20.205    | 1918105 | 98.230  | 21782  |
| Total |           | 1950629 | 100.000 | 22506  |

C:\Andrey\CF3(p-Me2NPh)OBnCF3\_s2.lcd

Supplementary figure 271. HPLC chromatogram for compound **6n**, Ligand: Ligand:(**4S,5R**)-**7a**

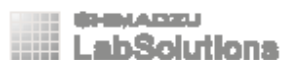

# Analysis Report

## <Sample Information>

Sample Name : CF3(p-Me2NPh)OBnCF3  
 Sample ID : CF3(p-Me2NPh)OBnCF3  
 Data Filename : CF3(p-Me2NPh)OBnCF3\_rac6.lcd  
 Method Filename : andrey.lcm  
 Batch Filename :  
 Vial # : 1-101  
 Injection Volume : 1 uL  
 Date Acquired : 27/05/2018 18:36:19  
 Date Processed : 27/05/2018 20:03:41

Sample Type : Unknown  
 Acquired by : System Administrator  
 Processed by : System Administrator

## <Chromatogram>

mAU

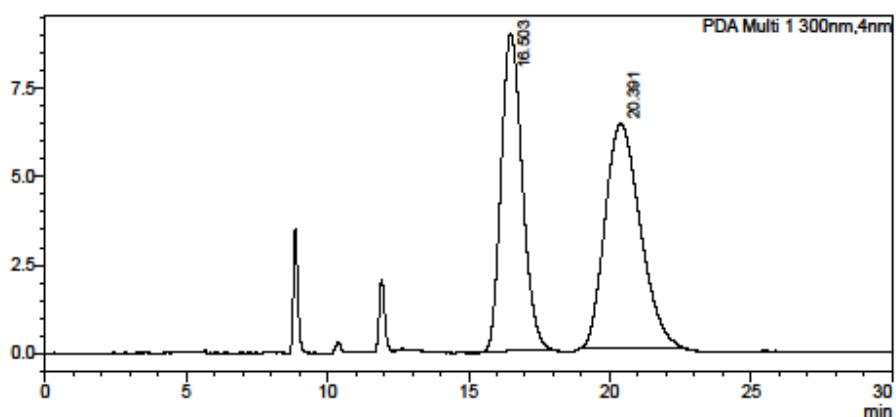

## <Peak Table>

PDA Ch1 300nm

| Peak# | Ret. Time | Area    | Area%   | Height |
|-------|-----------|---------|---------|--------|
| 1     | 16.503    | 465699  | 45.831  | 8967   |
| 2     | 20.391    | 550421  | 54.169  | 6352   |
| Total |           | 1016121 | 100.000 | 15318  |

C:\Andrey\CF3(p-Me2NPh)OBnCF3\_rac6.lcd

Supplementary figure 272. HPLC chromatogram for compound **6n**, Ligand: racemic



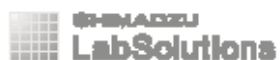

# Analysis Report

## <Sample Information>

Sample Name : CF3(3-thienyl)OBnCF3  
 Sample ID : CF3(3-thienyl)OBnCF3  
 Data Filename : CF3(3-thienyl)OBnCF3\_\_\_\_3.lcd  
 Method Filename : andrey.lcm  
 Batch Filename :  
 Vial # : 1-86  
 Injection Volume : 2 uL  
 Date Acquired : 13/05/2018 18:05:34  
 Date Processed : 13/05/2018 18:59:43

Sample Type : Unknown  
 Acquired by : System Administrator  
 Processed by : System Administrator

## <Chromatogram>

mAU

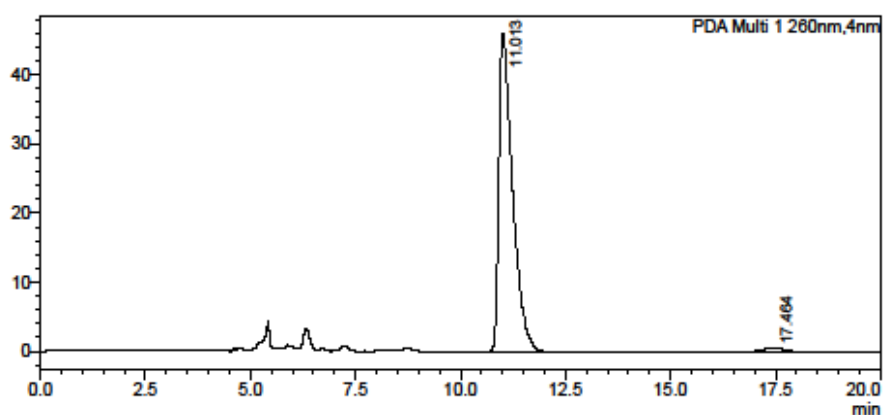

## <Peak Table>

PDA Ch1 260nm

| Peak# | Ret. Time | Area    | Area%   | Height |
|-------|-----------|---------|---------|--------|
| 1     | 11.013    | 1043782 | 98.233  | 45975  |
| 2     | 17.464    | 18778   | 1.767   | 556    |
| Total |           | 1062561 | 100.000 | 46531  |

C:\Andrey\CF3(3-thienyl)OBnCF3\_\_\_\_3.lcd

Supplementary figure 273. HPLC chromatogram for compound **6o**, Ligand: Ligand:(**4R,5S**)-**7a**



# Analysis Report

## <Sample Information>

Sample Name : CF3(3-thienyl)OBnCF3  
 Sample ID : CF3(3-thienyl)OBnCF3  
 Data Filename : CF3(3-thienyl)OBnCF3\_\_\_\_1.lcd  
 Method Filename : andrey.lcm  
 Batch Filename :  
 Vial # : 1-64  
 Injection Volume : 2 uL  
 Date Acquired : 13/05/2018 17:03:47  
 Date Processed : 13/05/2018 18:57:19

Sample Type : Unknown  
 Acquired by : System Administrator  
 Processed by : System Administrator

## <Chromatogram>

mAU

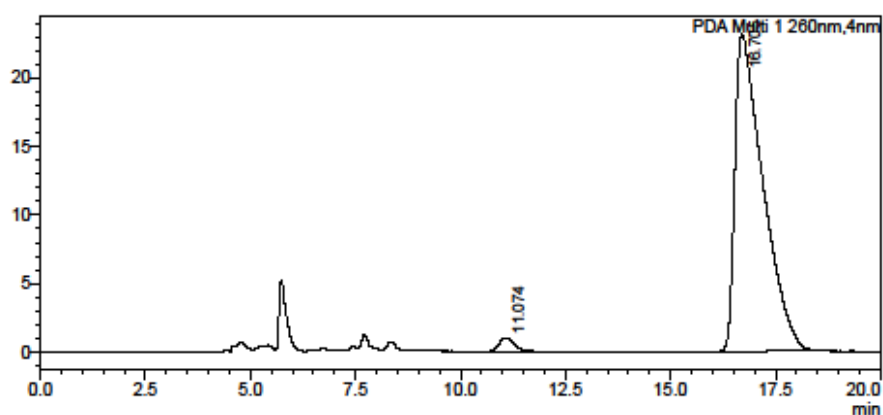

## <Peak Table>

PDA Ch1 260nm

| Peak# | Ret. Time | Area    | Area%   | Height |
|-------|-----------|---------|---------|--------|
| 1     | 11.074    | 23280   | 2.121   | 999    |
| 2     | 16.705    | 1074550 | 97.879  | 23129  |
| Total |           | 1097830 | 100.000 | 24128  |

C:\Andrey\CF3(3-thienyl)OBnCF3\_\_\_\_1.lcd

Supplementary figure 274. HPLC chromatogram for compound **6o**, Ligand: Ligand:(**4S,5R**)-**7a**

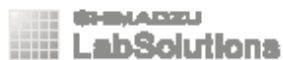

# Analysis Report

## <Sample Information>

Sample Name : CF3(3-thienyl)OBnCF3  
 Sample ID : CF3(3-thienyl)OBnCF3  
 Data Filename : CF3(3-thienyl)OBnCF3\_\_\_\_.4.lcd  
 Method Filename : andrey.lcm  
 Batch Filename :  
 Vial # : 1-81  
 Injection Volume : 2 uL  
 Date Acquired : 13/05/2018 18:33:19  
 Date Processed : 13/05/2018 19:00:49

Sample Type : Unknown  
 Acquired by : System Administrator  
 Processed by : System Administrator

## <Chromatogram>

mAU

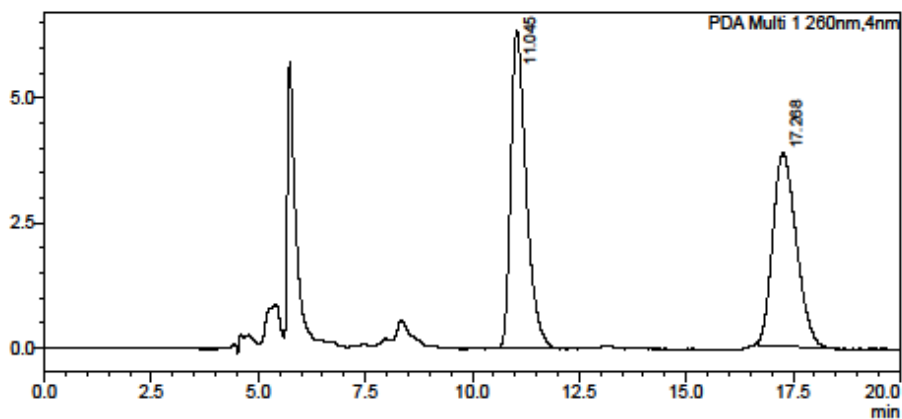

## <Peak Table>

PDA Ch1 260nm

| Peak# | Ret. Time | Area   | Area%   | Height |
|-------|-----------|--------|---------|--------|
| 1     | 11.045    | 158580 | 51.603  | 6347   |
| 2     | 17.268    | 148728 | 48.397  | 3861   |
| Total |           | 307308 | 100.000 | 10208  |

C:\Andrey\CF3(3-thienyl)OBnCF3\_\_\_\_.4.lcd

Supplementary figure 275. HPLC chromatogram for compound **60**, racemic



# Analysis Report

## <Sample Information>

Sample Name : CF3(5-(2-MeOPy))OBnCF3  
 Sample ID : CF3(5-(2-MeOPy))OBnCF3  
 Data Filename : CF3(5-(2-MeOPy))OBnCF3\_\_2.lcd  
 Method Filename : andrey.lcm  
 Batch Filename :  
 Vial # : 1-77  
 Injection Volume : 2 uL  
 Date Acquired : 06/05/2018 12:14:30  
 Date Processed : 07/05/2018 16:32:15

Sample Type : Unknown  
 Acquired by : System Administrator  
 Processed by : System Administrator

## <Chromatogram>

mAU

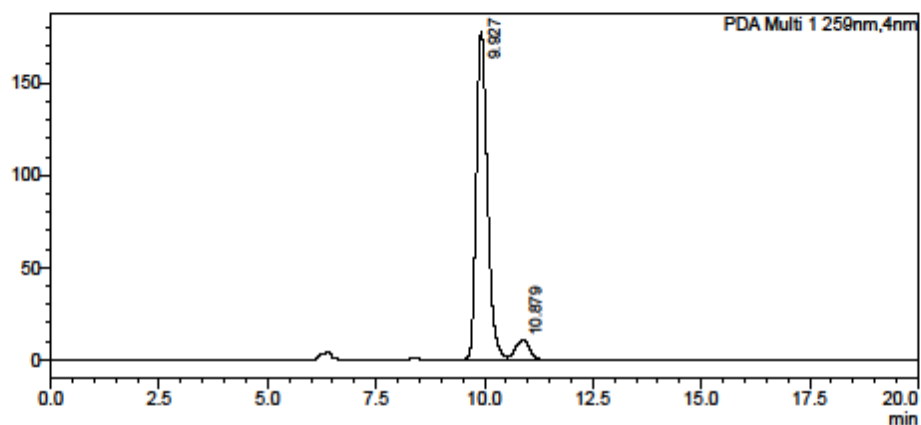

## <Peak Table>

PDA Ch1 259nm

| Peak# | Ret. Time | Area    | Area%   | Height |
|-------|-----------|---------|---------|--------|
| 1     | 9.927     | 3191573 | 93.096  | 177314 |
| 2     | 10.879    | 236675  | 6.904   | 10475  |
| Total |           | 3428249 | 100.000 | 187790 |

C:\Andrey\CF3(5-(2-MeOPy))OBnCF3\_\_2.lcd

Supplementary figure 276. HPLC chromatogram for compound **6p**, Ligand: Ligand:(**4R,5S**)-**7a**

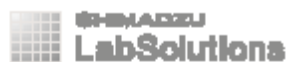

# Analysis Report

## <Sample Information>

Sample Name : CF3(5-(2-MeOPy))OBnCF3  
 Sample ID : CF3(5-(2-MeOPy))OBnCF3  
 Data Filename : CF3(5-(2-MeOPy))OBnCF3\_\_1.lcd  
 Method Filename : andrey.lcm  
 Batch Filename :  
 Vial # : 1-78  
 Injection Volume : 2 uL  
 Date Acquired : 06/05/2018 11:50:23  
 Date Processed : 07/05/2018 16:28:45

Sample Type : Unknown  
 Acquired by : System Administrator  
 Processed by : System Administrator

## <Chromatogram>

mAU

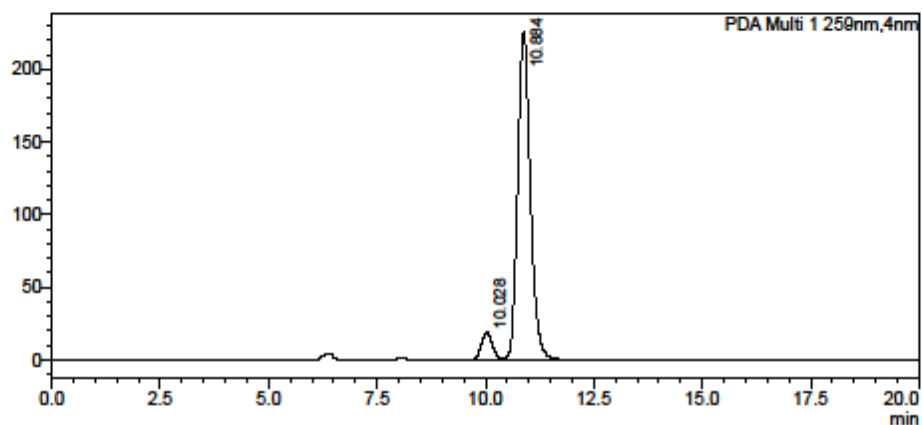

## <Peak Table>

PDA Ch1 259nm

| Peak# | Ret. Time | Area    | Area%   | Height |
|-------|-----------|---------|---------|--------|
| 1     | 10.028    | 327869  | 6.730   | 18665  |
| 2     | 10.884    | 4543673 | 93.270  | 225184 |
| Total |           | 4871542 | 100.000 | 243849 |

PDA Ch2 259nm

| Peak# | Ret. Time | Area    | Area%   | Height |
|-------|-----------|---------|---------|--------|
| 1     | 10.028    | 328235  | 6.732   | 18672  |
| 2     | 10.884    | 4547551 | 93.268  | 225209 |
| Total |           | 4875786 | 100.000 | 243881 |

C:\Andrey\CF3(5-(2-MeOPy))OBnCF3\_\_1.lcd

Supplementary figure 277. HPLC chromatogram for compound **6p**, Ligand: Ligand:(**4S,5R**)-**7a**



# Analysis Report

## <Sample Information>

Sample Name : CF3(5-(2-MeOPy))OBnCF3  
 Sample ID : CF3(5-(2-MeOPy))OBnCF3  
 Data Filename : CF3(5-(2-MeOPy))OBnCF3\_\_3.lcd  
 Method Filename : andrey.lcm  
 Batch Filename :  
 Vial # : 1-78  
 Injection Volume : 2 uL  
 Date Acquired : 06/05/2018 12:35:34  
 Date Processed : 07/05/2018 16:33:19

Sample Type : Unknown  
 Acquired by : System Administrator  
 Processed by : System Administrator

## <Chromatogram>

mAU

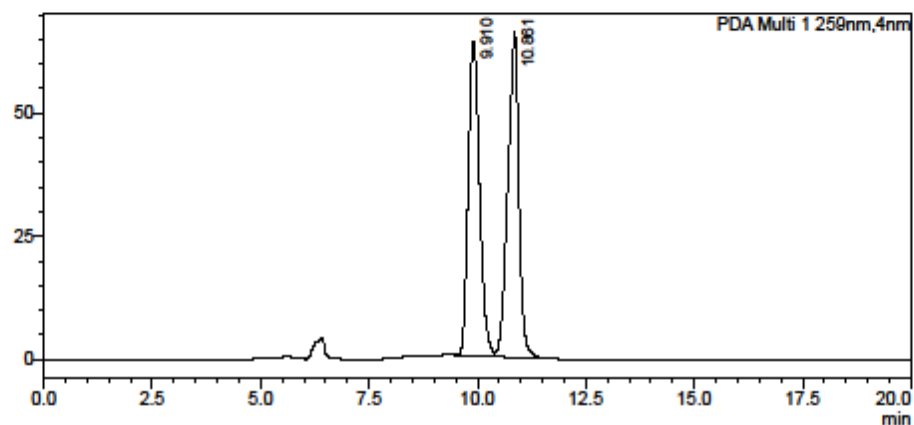

## <Peak Table>

PDA Ch1 259nm

| Peak# | Ret. Time | Area    | Area%   | Height |
|-------|-----------|---------|---------|--------|
| 1     | 9.910     | 1165498 | 50.022  | 63723  |
| 2     | 10.861    | 1164474 | 49.978  | 66011  |
| Total |           | 2329972 | 100.000 | 129733 |

C:\Andrey\CF3(5-(2-MeOPy))OBnCF3\_\_3.lcd

Supplementary figure 278. HPLC chromatogram for compound **6p**, racemic



# Analysis Report

## <Sample Information>

Sample Name : CF3(3-quinoliny)OBnCF3  
 Sample ID : CF3(3-quinoliny)OBnCF3  
 Data Filename : CF3(3-quinoliny)OBnCF3\_1.lcd  
 Method Filename : andrey.lcm  
 Batch Filename :  
 Vial # : 1-75  
 Injection Volume : 3 uL  
 Date Acquired : 04/05/2018 17:42:18  
 Date Processed : 07/05/2018 16:45:00

Sample Type : Unknown  
 Acquired by : System Administrator  
 Processed by : System Administrator

## <Chromatogram>

mAU

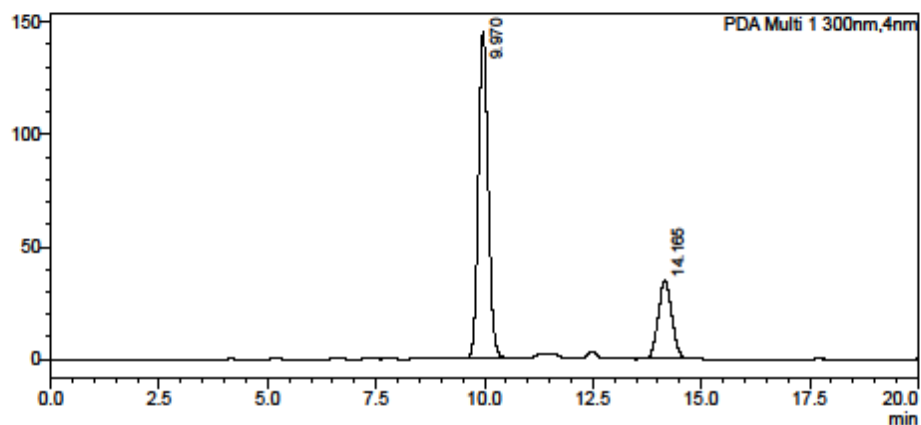

## <Peak Table>

PDA Ch1 300nm

| Peak# | Ret. Time | Area    | Area%   | Height |
|-------|-----------|---------|---------|--------|
| 1     | 9.970     | 2283509 | 74.680  | 145216 |
| 2     | 14.165    | 774220  | 25.320  | 34848  |
| Total |           | 3057729 | 100.000 | 180064 |

C:\Andrey\CF3(3-quinoliny)OBnCF3\_1.lcd

Supplementary figure 279. HPLC chromatogram for compound **6q**, Ligand: Ligand:(**4R,5S**)-**7a**



# Analysis Report

## <Sample Information>

Sample Name : CF3(3-quinoliny)OBnCF3  
 Sample ID : CF3(3-quinoliny)OBnCF3  
 Data Filename : CF3(3-quinoliny)OBnCF3\_4.lcd  
 Method Filename : andrey.lcm  
 Batch Filename :  
 Vial # : 1-88  
 Injection Volume : 2 uL  
 Date Acquired : 08/05/2018 13:41:49  
 Date Processed : 08/05/2018 14:22:19  
 Sample Type : Unknown  
 Acquired by : System Administrator  
 Processed by : System Administrator

## <Chromatogram>

mAU

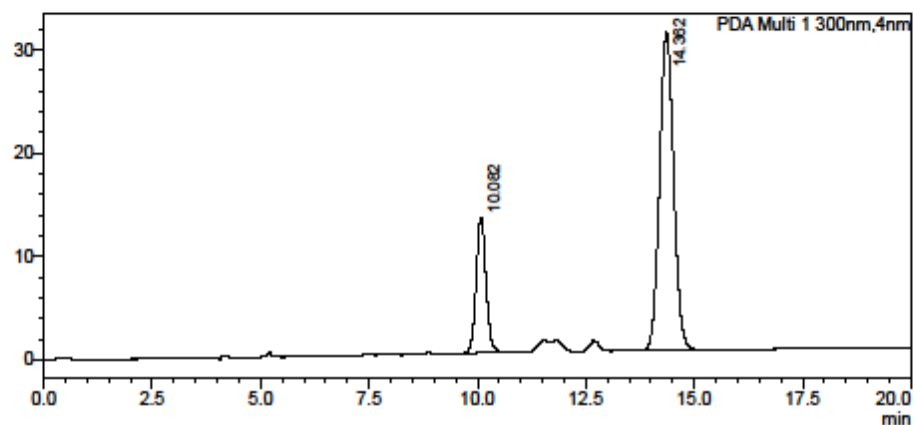

## <Peak Table>

PDA Ch1 300nm

| Peak# | Ret. Time | Area   | Area%   | Height |
|-------|-----------|--------|---------|--------|
| 1     | 10.082    | 207283 | 22.989  | 13173  |
| 2     | 14.362    | 694312 | 77.011  | 30797  |
| Total |           | 901574 | 100.000 | 43970  |

C:\Andrey\CF3(3-quinoliny)OBnCF3\_4.lcd

Supplementary figure 280. HPLC chromatogram for compound **6q**, Ligand: Ligand:(4S,5R)-7a





# Analysis Report

## <Sample Information>

Sample Name : CF3(3-Quinoliny)OBnCF3  
 Sample ID : CF3(3-Quinoliny)OBnCF3  
 Data Filename : CF3(3-Quinoliny)OBnCF3\_rao4.lcd  
 Method Filename : andrey.lcm  
 Batch Filename :  
 Vial # : 1-105  
 Injection Volume : 1 uL  
 Date Acquired : 18/05/2018 12:27:28  
 Date Processed : 18/05/2018 16:21:45

Sample Type : Unknown  
 Acquired by : System Administrator  
 Processed by : System Administrator

## <Chromatogram>

mAU

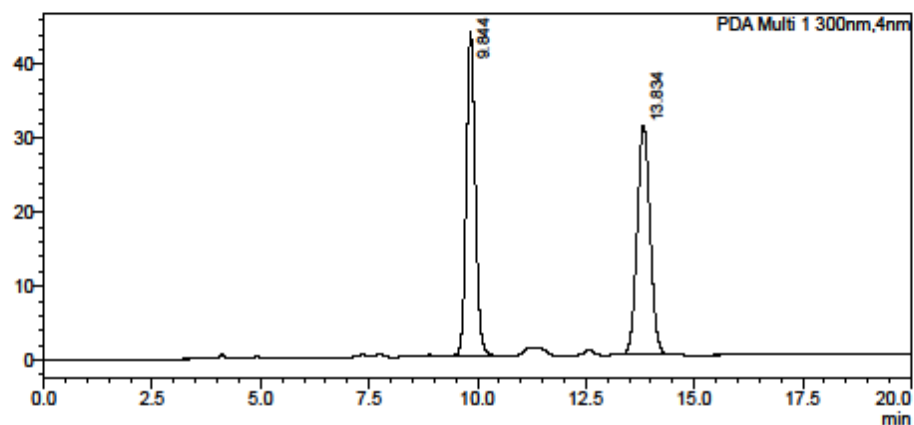

## <Peak Table>

PDA Ch1 300nm

| Peak# | Ret. Time | Area    | Area%   | Height |
|-------|-----------|---------|---------|--------|
| 1     | 9.844     | 632363  | 49.450  | 43812  |
| 2     | 13.834    | 646422  | 50.550  | 31099  |
| Total |           | 1278784 | 100.000 | 74911  |

C:\Andrey\CF3(3-Quinoliny)OBnCF3\_rao4.lcd

Supplementary figure 281. HPLC chromatogram for compound **6n**, racemic

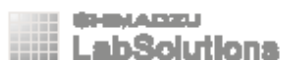

# Analysis Report

## <Sample Information>

Sample Name : C4F9(p-MeOPh)-OBnCF3  
 Sample ID : C4F9(p-MeOPh)-OBnCF3  
 Data Filename : C4F9(p-MeOPh)-OBnCF3\_7.lcd  
 Method Filename : andrey.lcm  
 Batch Filename :  
 Vial # : 1-77  
 Injection Volume : 2 uL  
 Date Acquired : 11/07/2017 17:40:58  
 Date Processed : 22/08/2017 19:28:35

Sample Type : Unknown  
 Acquired by : System Administrator  
 Processed by : System Administrator

## <Chromatogram>

mAU

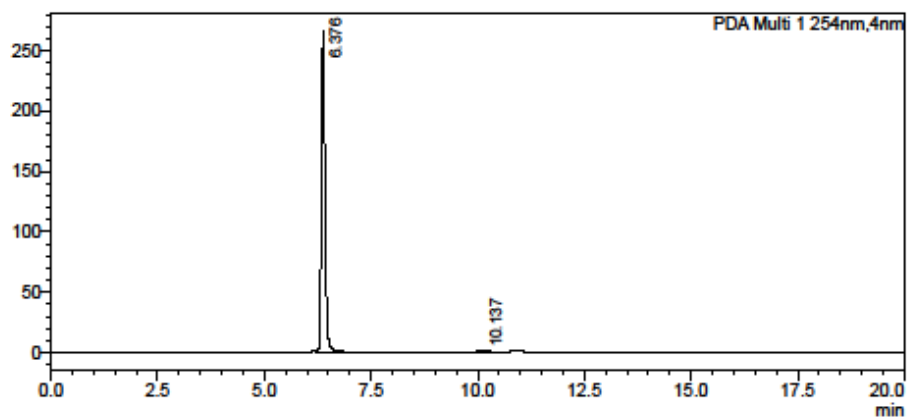

## <Peak Table>

PDA Ch1 254nm

| Peak# | Ret. Time | Area    | Area%   | Height |
|-------|-----------|---------|---------|--------|
| 1     | 6.376     | 1602066 | 98.113  | 265753 |
| 2     | 10.137    | 30813   | 1.887   | 1277   |
| Total |           | 1632879 | 100.000 | 267031 |

C:\Andrey\C4F9(p-MeOPh)-OBnCF3\_7.lcd

Supplementary figure 282. HPLC chromatogram for compound **6b'**, Ligand:(**4R,5S**)-**7a**

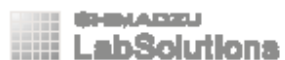

# Analysis Report

## <Sample Information>

Sample Name : C4F9(p-MeOPh)OBnCF3  
 Sample ID : C4F9(p-MeOPh)OBnCF3  
 Data Filename : C4F9(p-MeOPh)OBnCF3\_1.lcd  
 Method Filename : andrey.lcm  
 Batch Filename :  
 Vial # : 1-93  
 Injection Volume : 1 uL  
 Date Acquired : 18/08/2017 13:22:41  
 Date Processed : 22/08/2017 19:25:05

Sample Type : Unknown  
 Acquired by : System Administrator  
 Processed by : System Administrator

## <Chromatogram>

mAU

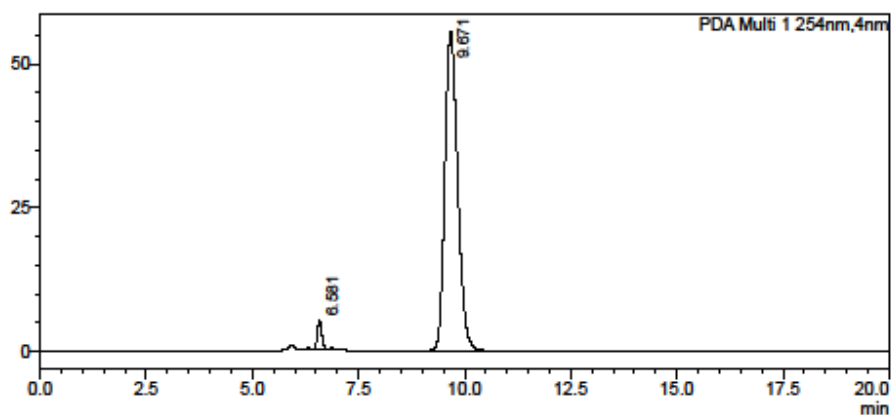

## <Peak Table>

PDA Ch1 254nm

| Peak# | Ret. Time | Area    | Area%   | Height |
|-------|-----------|---------|---------|--------|
| 1     | 6.581     | 38738   | 3.206   | 5155   |
| 2     | 9.671     | 1169397 | 96.794  | 55444  |
| Total |           | 1208135 | 100.000 | 60599  |

C:\Andrey\C4F9(p-MeOPh)OBnCF3\_1.lcd

Supplementary figure 283. HPLC chromatogram for compound **6b'**, Ligand:(**4S,5R**)-**7a**



# Analysis Report

## <Sample Information>

Sample Name : C4F9(p-MeOPh)OBnCF3 rac  
 Sample ID : C4F9(p-MeOPh)OBnCF3 rac  
 Data Filename : C4F9(p-MeOPh)OBnCF3\_rac2.lcd  
 Method Filename : andrey.lcm  
 Batch Filename :  
 Vial # : 1-92  
 Injection Volume : 1 uL  
 Date Acquired : 15/08/2017 16:16:31  
 Date Processed : 15/08/2017 17:20:42

Sample Type : Unknown  
 Acquired by : System Administrator  
 Processed by : System Administrator

## <Chromatogram>

mAU

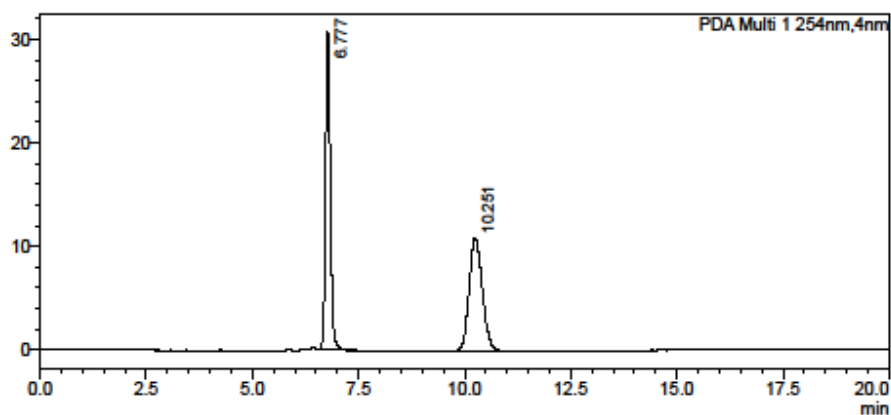

## <Peak Table>

PDA Ch1 254nm

| Peak# | Ret. Time | Area   | Area%   | Height |
|-------|-----------|--------|---------|--------|
| 1     | 6.777     | 239138 | 50.028  | 30712  |
| 2     | 10.251    | 238875 | 49.972  | 10994  |
| Total |           | 478012 | 100.000 | 41706  |

C:\Andrey\C4F9(p-MeOPh)OBnCF3\_rac2.lcd

Supplementary figure 284. HPLC chromatogram for compound **6b'**, racemic



# Analysis Report

**<Sample Information>**

Sample Name : C8F17(p-MeOPh)OBnCF3\_old  
 Sample ID : C8F17(p-MeOPh)OBnCF3\_old  
 Data Filename : C8F17(p-MeOPh)OBnCF3\_old15.lcd  
 Method Filename : andrey.lcm  
 Batch Filename :  
 Vial # : 1-74  
 Injection Volume : 1 uL  
 Date Acquired : 28/08/2017 18:47:12  
 Date Processed : 28/08/2017 19:21:16

Sample Type : Unknown  
 Acquired by : System Administrator  
 Processed by : System Administrator

**<Chromatogram>**

mAU

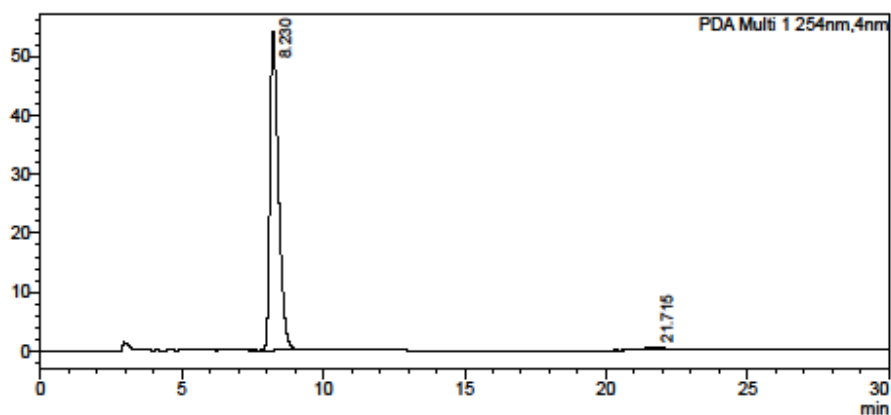**<Peak Table>**

PDA Ch1 254nm

| Peak# | Ret. Time | Area    | Area%   | Height |
|-------|-----------|---------|---------|--------|
| 1     | 8.230     | 1142925 | 97.626  | 53869  |
| 2     | 21.715    | 27789   | 2.374   | 595    |
| Total |           | 1170714 | 100.000 | 54464  |

C:\Andrey\C8F17(p-MeOPh)OBnCF3\_old15.lcd

Supplementary figure 285. HPLC chromatogram for compound **6b''**, Ligand:(**4R,5S**)-7a



# Analysis Report

## <Sample Information>

Sample Name : C8F17(p-MeOPh)OBnCF3\_new  
 Sample ID : C8F17(p-MeOPh)OBnCF3\_rac  
 Data Filename : C8F17(p-MeOPh)OBnCF3\_new14.lcd  
 Method Filename : andrey.lcm  
 Batch Filename :  
 Vial # : 1-46  
 Injection Volume : 2 uL  
 Date Acquired : 28/08/2017 18:12:33  
 Date Processed : 28/08/2017 19:03:30

Sample Type : Unknown  
 Acquired by : System Administrator  
 Processed by : System Administrator

## <Chromatogram>

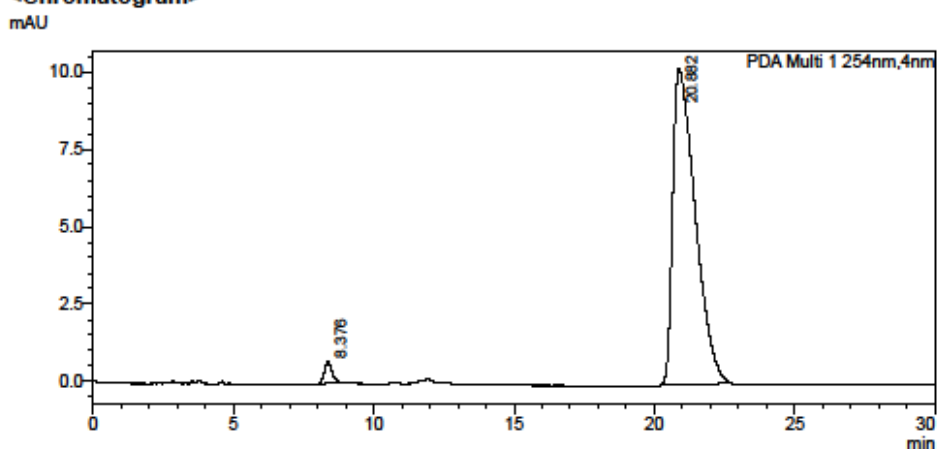

## <Peak Table>

PDA Ch1 254nm

| Peak# | Ret. Time | Area   | Area%   | Height |
|-------|-----------|--------|---------|--------|
| 1     | 8.376     | 13354  | 2.296   | 689    |
| 2     | 20.882    | 568398 | 97.704  | 10188  |
| Total |           | 581752 | 100.000 | 10877  |

C:\Andrey\C8F17(p-MeOPh)OBnCF3\_new14.lcd

Supplementary figure 286. HPLC chromatogram for compound **6b''**, Ligand:(**4S,5R**)-**7a**



# Analysis Report

## <Sample Information>

Sample Name : C8F17(p-MeOPh)OBnCF3\_rac  
 Sample ID : C8F17(p-MeOPh)OBnCF3\_rac  
 Data Filename : C8F17(p-MeOPh)OBnCF3\_rac13.lcd  
 Method Filename : andrey.lcm  
 Batch Filename :  
 Vial # : 1-75  
 Injection Volume : 1 uL  
 Date Acquired : 28/08/2017 17:41:41  
 Date Processed : 28/08/2017 19:01:38

Sample Type : Unknown  
 Acquired by : System Administrator  
 Processed by : System Administrator

## <Chromatogram>

mAU

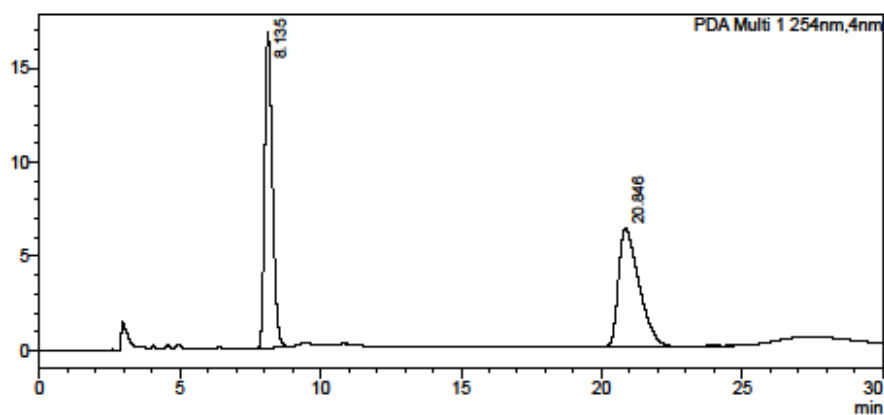

## <Peak Table>

PDA Ch1 254nm

| Peak# | Ret. Time | Area   | Area%   | Height |
|-------|-----------|--------|---------|--------|
| 1     | 8.135     | 322801 | 50.080  | 16755  |
| 2     | 20.846    | 321568 | 49.920  | 6297   |
| Total |           | 644169 | 100.000 | 23052  |

C:\Andrey\C8F17(p-MeOPh)OBnCF3\_rac13.lcd

Supplementary figure 287. HPLC chromatogram for compound **6b''**, racemic

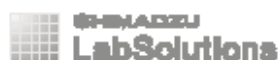

# Analysis Report

## <Sample Information>

Sample Name : CF3(vinyl)-OBn\_new  
 Sample ID : CF3(vinyl)-OBn\_new  
 Data Filename : CF3(vinyl)-OBn\_new1.lcd  
 Method Filename : shutdown.lcm  
 Batch Filename :  
 Vial # : 1-100  
 Injection Volume : 3 uL  
 Date Acquired : 02/07/2017 12:05:18  
 Date Processed : 09/07/2017 10:06:44

Sample Type : Unknown  
 Acquired by : System Administrator  
 Processed by : System Administrator

## <Chromatogram>

mAU

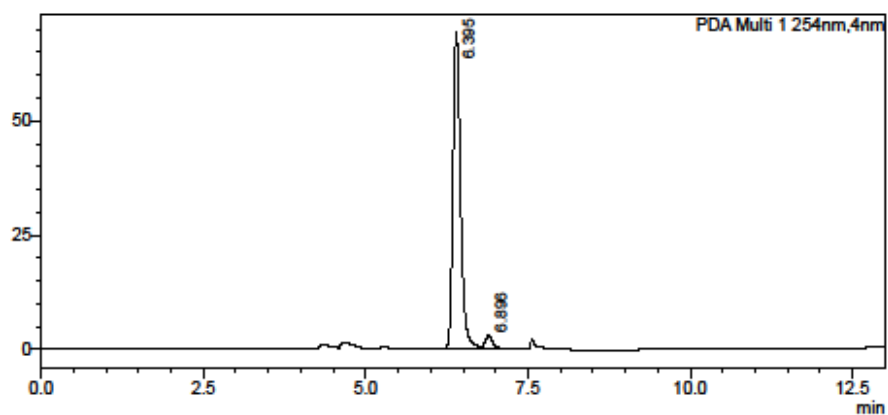

## <Peak Table>

PDA Ch1 254nm

| Peak# | Ret. Time | Area   | Area%   | Height |
|-------|-----------|--------|---------|--------|
| 1     | 6.395     | 567555 | 95.308  | 69188  |
| 2     | 6.896     | 27943  | 4.692   | 2934   |
| Total |           | 595498 | 100.000 | 72122  |

C:\Andrey\CF3(vinyl)-OBn\_new1.lcd

Supplementary figure 288. HPLC chromatogram for compound 8a, Ligand:(4R)-7g




**LabSolutions** Analysis Report

## &lt;Sample Information&gt;

Sample Name : CF3(vinyl)-OBn\_new  
 Sample ID : CF3(vinyl)-OBn\_new  
 Data Filename : CF3(vinyl)-OBn\_new1.lcd  
 Method Filename : shutdown.lcm  
 Batch Filename :  
 Vial # : 1-100  
 Injection Volume : 3 uL  
 Date Acquired : 02/07/2017 12:05:18  
 Date Processed : 09/07/2017 10:08:44

Sample Type : Unknown  
 Acquired by : System Administrator  
 Processed by : System Administrator

## &lt;Chromatogram&gt;

mAU

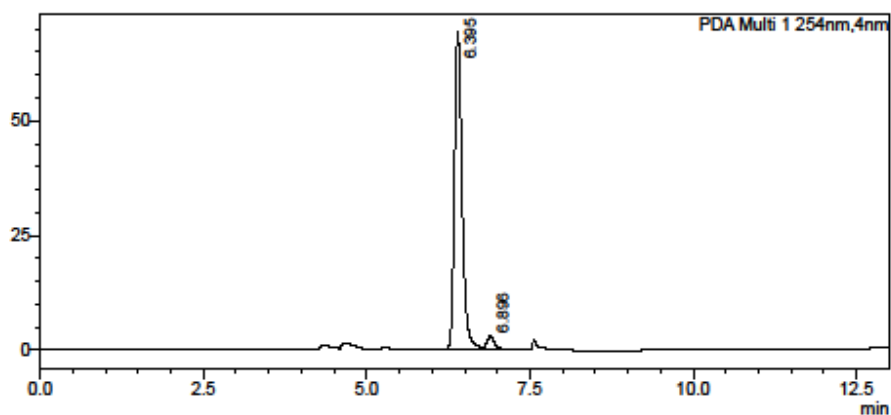

## &lt;Peak Table&gt;

PDA Ch1 254nm

| Peak# | Ret. Time | Area   | Area%   | Height |
|-------|-----------|--------|---------|--------|
| 1     | 6.395     | 567555 | 95.308  | 69188  |
| 2     | 6.896     | 27943  | 4.692   | 2934   |
| Total |           | 595498 | 100.000 | 72122  |

C:\Andrey\CF3(vinyl)-OBn\_new1.lcd

Supplementary figure 289. HPLC chromatogram for compound **8a**, Ligand:(**4S**)-**7g**



# Analysis Report

## <Sample Information>

Sample Name : CF3(vin)-OBnCF3  
 Sample ID : CF3(vin)-OBnCF3  
 Data Filename : CF3(vin)-OBnCF4.lcd  
 Method Filename : shutdown.lcm  
 Batch Filename :  
 Vial # : 1-83  
 Injection Volume : 3 uL  
 Date Acquired : 08/07/2017 18:03:00  
 Date Processed : 09/07/2017 10:04:24

Sample Type : Unknown  
 Acquired by : System Administrator  
 Processed by : System Administrator

## <Chromatogram>

mAU

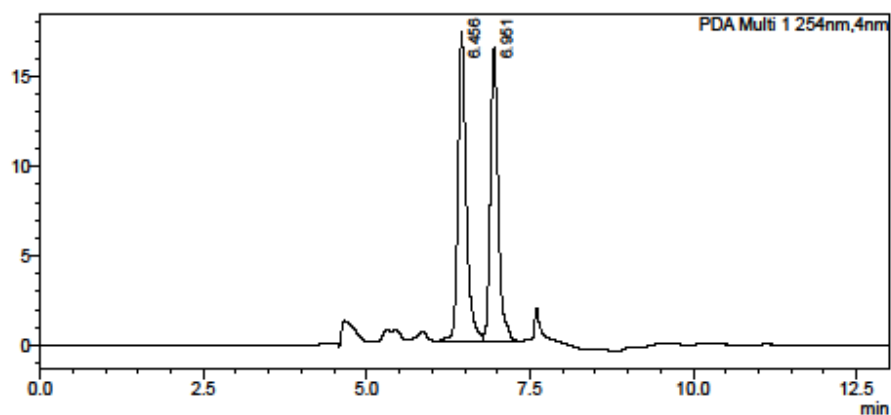

## <Peak Table>

PDA Ch1 254nm

| Peak# | Ret. Time | Area   | Area%   | Height |
|-------|-----------|--------|---------|--------|
| 1     | 6.456     | 153978 | 52.697  | 17254  |
| 2     | 6.951     | 138216 | 47.303  | 16430  |
| Total |           | 292194 | 100.000 | 33685  |

C:\Andrey\CF3(vin)-OBnCF4.lcd

Supplementary figure 290. HPLC chromatogram for compound **8a**, racemic



# Analysis Report

**<Sample Information>**

Sample Name : CF3(octenyl)-OBn\_new  
 Sample ID : CF3(octenyl)-OBn\_new  
 Data Filename : CF3(octenyl)-OBn\_new1.lcd  
 Method Filename : shutdown.lcm  
 Batch Filename :  
 Vial # : 1-101  
 Injection Volume : 3 uL  
 Date Acquired : 02/07/2017 13:05:34  
 Date Processed : 09/07/2017 10:11:48

Sample Type : Unknown  
 Acquired by : System Administrator  
 Processed by : System Administrator

**<Chromatogram>**

mAU

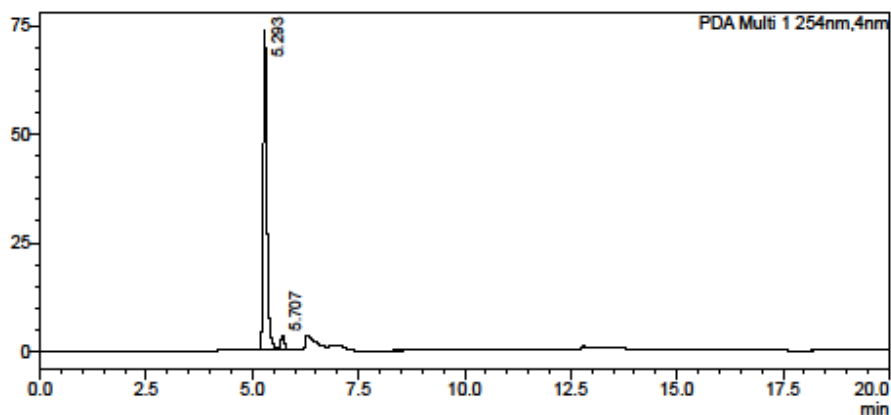**<Peak Table>**

PDA Ch1 254nm

| Peak# | Ret. Time | Area   | Area%   | Height |
|-------|-----------|--------|---------|--------|
| 1     | 5.293     | 445048 | 95.298  | 73443  |
| 2     | 5.707     | 21960  | 4.702   | 3488   |
| Total |           | 467007 | 100.000 | 76931  |

C:\Andrey\CF3(octenyl)-OBn\_new1.lcd

Supplementary figure 291. HPLC chromatogram for compound **8b**, Ligand:(**4R**)-**7g**



# Analysis Report

## <Sample Information>

Sample Name : CF3(octenyl)-OBn  
 Sample ID : CF3(octenyl)-OBn  
 Data Filename : CF3(octenyl)-OBn3.lcd  
 Method Filename : shutdown.lcm  
 Batch Filename :  
 Vial # : 1-89  
 Injection Volume : 1 uL  
 Date Acquired : 01/07/2017 17:42:25  
 Date Processed : 09/07/2017 10:13:55

Sample Type : Unknown  
 Acquired by : System Administrator  
 Processed by : System Administrator

## <Chromatogram>

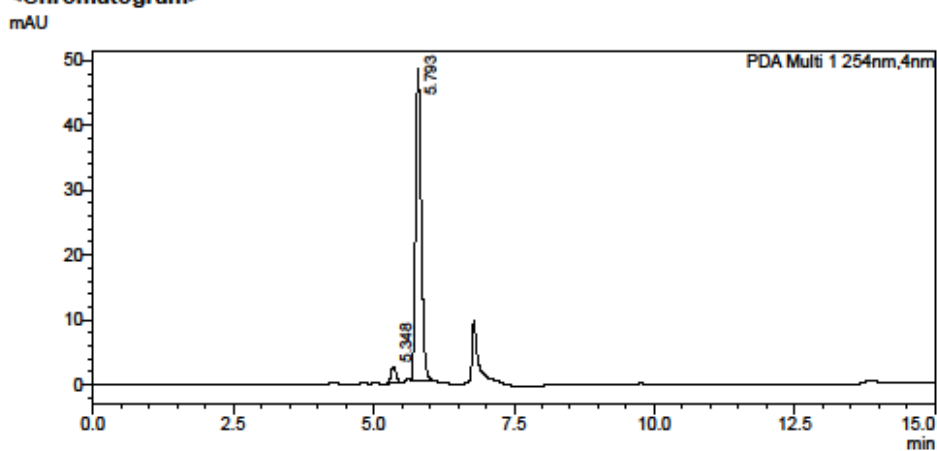

## <Peak Table>

PDA Ch1 254nm

| Peak# | Ret. Time | Area   | Area%   | Height |
|-------|-----------|--------|---------|--------|
| 1     | 5.348     | 16262  | 4.669   | 2636   |
| 2     | 5.793     | 332014 | 95.331  | 47997  |
| Total |           | 348276 | 100.000 | 50633  |

C:\Andrey\CF3(octenyl)-OBn3.lcd

Supplementary figure 292. HPLC chromatogram for compound **8b**, Ligand:(**4S**)-**7g**



# Analysis Report

## <Sample Information>

Sample Name : CF3(octenyl)OBn rac  
 Sample ID : CF3(octenyl)OBn rac  
 Data Filename : CF3(octenyl)OBn1rac1.lcd  
 Method Filename : andrey.lcm  
 Batch Filename :  
 Vial # : 1-99  
 Injection Volume : 2 uL  
 Date Acquired : 10/08/2017 15:11:10  
 Date Processed : 10/08/2017 18:04:13

Sample Type : Unknown  
 Acquired by : System Administrator  
 Processed by : System Administrator

## <Chromatogram>

mAU

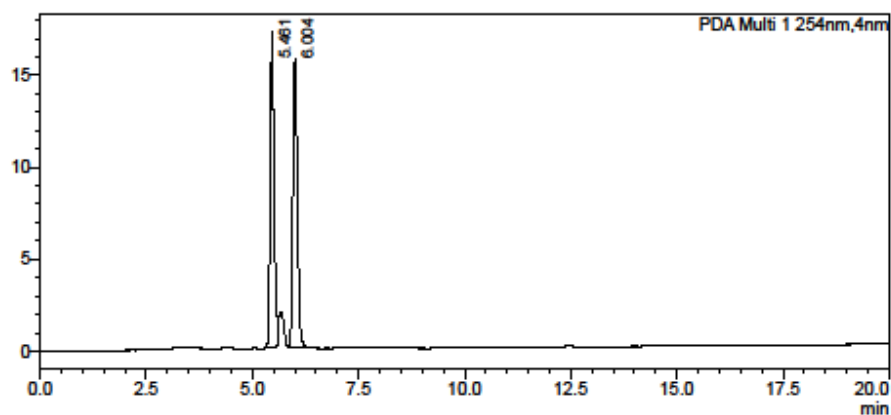

## <Peak Table>

PDA Ch1 254nm

| Peak# | Ret. Time | Area   | Area%   | Height |
|-------|-----------|--------|---------|--------|
| 1     | 5.461     | 109782 | 49.309  | 17117  |
| 2     | 6.004     | 112859 | 50.691  | 15861  |
| Total |           | 222641 | 100.000 | 32778  |

C:\Andrey\CF3(octenyl)OBn1rac1.lcd

Supplementary figure 293. HPLC chromatogram for compound **8b**, racemic



# Analysis Report

## <Sample Information>

Sample Name : CF3(stryrenyl)-OBn\_new  
 Sample ID : CF3(stryrenyl)-OBn\_new  
 Data Filename : CF3(stryrenyl)-OBn\_new1.lcd  
 Method Filename : shutdown.lcm  
 Batch Filename :  
 Vial # : 1-90  
 Injection Volume : 3 uL  
 Date Acquired : 02/07/2017 11:41:30  
 Date Processed : 09/07/2017 10:12:56

Sample Type : Unknown  
 Acquired by : System Administrator  
 Processed by : System Administrator

## <Chromatogram>

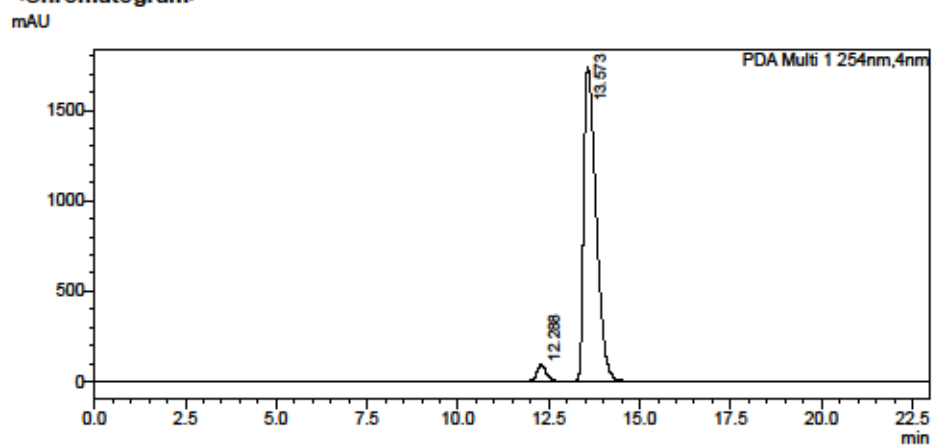

## <Peak Table>

PDA Ch1 254nm

| Peak# | Ret. Time | Area     | Area%   | Height  |
|-------|-----------|----------|---------|---------|
| 1     | 12.288    | 1705070  | 3.982   | 91906   |
| 2     | 13.573    | 41113424 | 96.018  | 1735969 |
| Total |           | 42818495 | 100.000 | 1827875 |

C:\Andrey\CF3(stryrenyl)-OBn\_new1.lcd

Supplementary figure 294. HPLC chromatogram for compound **8c**, Ligand:(**4R**)-**7g**



# Analysis Report

## <Sample Information>

Sample Name : CF3(styrenyl)-OBn  
 Sample ID : CF3(styrenyl)-OBn  
 Data Filename : CF3(styrenyl)-OBn3.lcd  
 Method Filename : shutdown.lcm  
 Batch Filename :  
 Vial # : 1-86  
 Injection Volume : 4 uL  
 Date Acquired : 29/06/2017 16:10:43  
 Date Processed : 30/06/2017 17:22:37

Sample Type : Unknown  
 Acquired by : System Administrator  
 Processed by : System Administrator

## <Chromatogram>

mAU

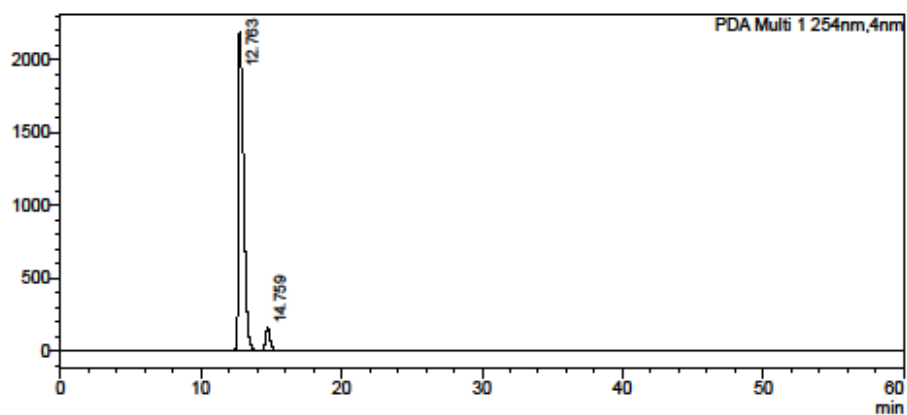

## <Peak Table>

PDA Ch1 254nm

| Peak# | Ret. Time | Area     | Area%   | Height  |
|-------|-----------|----------|---------|---------|
| 1     | 12.763    | 58235004 | 94.207  | 2187325 |
| 2     | 14.759    | 3580838  | 5.793   | 158238  |
| Total |           | 61815842 | 100.000 | 2345561 |

C:\Andrey\CF3(styrenyl)-OBn3.lcd

Supplementary figure 295. HPLC chromatogram for compound **8a**, Ligand:(**4S**)-**7g**

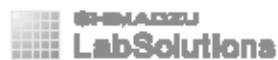

# Analysis Report

## <Sample Information>

Sample Name : CF3(styrenyl)OBn\_rac  
 Sample ID : CF3(styrenyl)OBn\_rac  
 Data Filename : CF3(styrenyl)OBn\_rac1.lcd  
 Method Filename : andrey.lcm  
 Batch Filename :  
 Vial # : 1-98  
 Injection Volume : 2 uL  
 Date Acquired : 10/08/2017 16:28:26  
 Date Processed : 10/08/2017 17:44:09

Sample Type : Unknown  
 Acquired by : System Administrator  
 Processed by : System Administrator

## <Chromatogram>

mAU

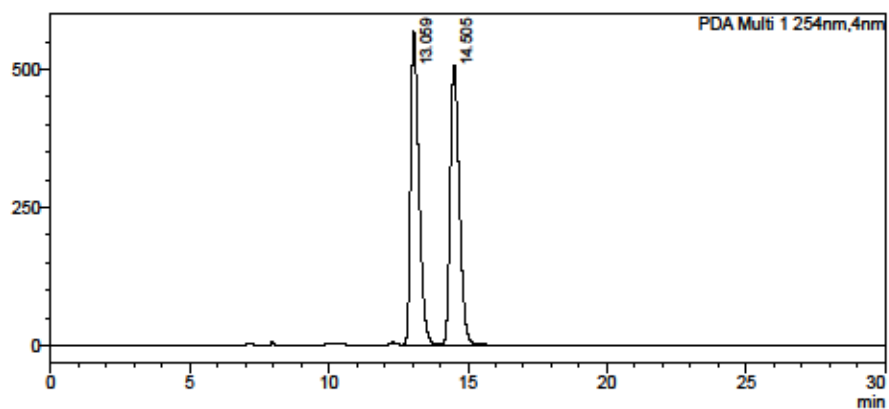

## <Peak Table>

PDA Ch1 254nm

| Peak# | Ret. Time | Area     | Area%   | Height  |
|-------|-----------|----------|---------|---------|
| 1     | 13.059    | 11747613 | 50.428  | 567217  |
| 2     | 14.505    | 11548344 | 49.572  | 507420  |
| Total |           | 23295957 | 100.000 | 1074637 |

C:\Andrey\CF3(styrenyl)OBn\_rac1.lcd

Supplementary figure 296. HPLC chromatogram for compound **8c**, racemic





# Analysis Report

## <Sample Information>

Sample Name : CF3(styrenyl)OBnCF3\_new  
 Sample ID : CF3(styrenyl)OBnCF3\_new  
 Data Filename : CF3(styrenyl)OBnCF3\_new7.lcd  
 Method Filename : andrey.lcm  
 Batch Filename :  
 Vial # : 1-82  
 Injection Volume : 1 uL  
 Date Acquired : 21/08/2017 18:35:08  
 Date Processed : 21/08/2017 19:22:00

Sample Type : Unknown  
 Acquired by : System Administrator  
 Processed by : System Administrator

## <Chromatogram>

mAU

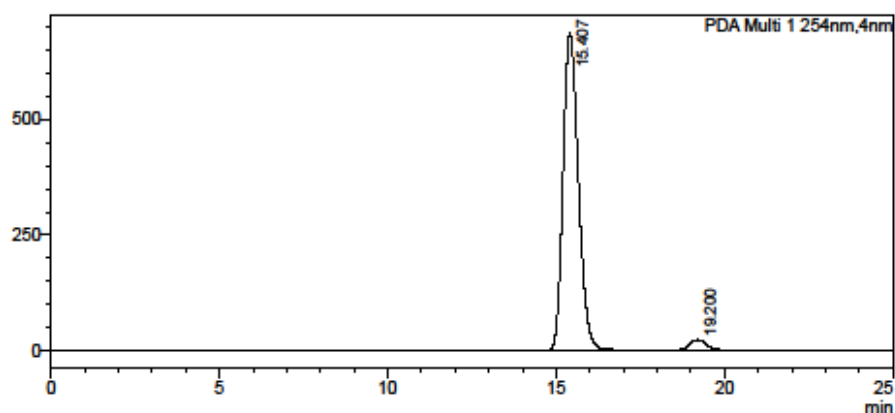

## <Peak Table>

PDA Ch1 254nm

| Peak# | Ret. Time | Area     | Area%   | Height |
|-------|-----------|----------|---------|--------|
| 1     | 15.407    | 21777529 | 96.320  | 686498 |
| 2     | 19.200    | 832146   | 3.680   | 22863  |
| Total |           | 22609675 | 100.000 | 709360 |

C:\Andrey\CF3(styrenyl)OBnCF3\_new7.lcd

Supplementary figure 297. HPLC chromatogram for compound **8f**, Ligand:(**4S**)-**7g**

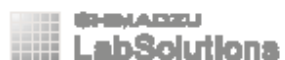

# Analysis Report

## <Sample Information>

Sample Name : CF3(styrenyl)OBnCF3\_old  
 Sample ID : CF3(styrenyl)OBnCF3\_old  
 Data Filename : CF3(styrenyl)OBnCF3\_old8.lcd  
 Method Filename : andrey.lcm  
 Batch Filename :  
 Vial # : 1-36  
 Injection Volume : 1 uL  
 Date Acquired : 21/08/2017 18:08:31  
 Date Processed : 21/08/2017 19:21:28

Sample Type : Unknown  
 Acquired by : System Administrator  
 Processed by : System Administrator

## <Chromatogram>

mAU

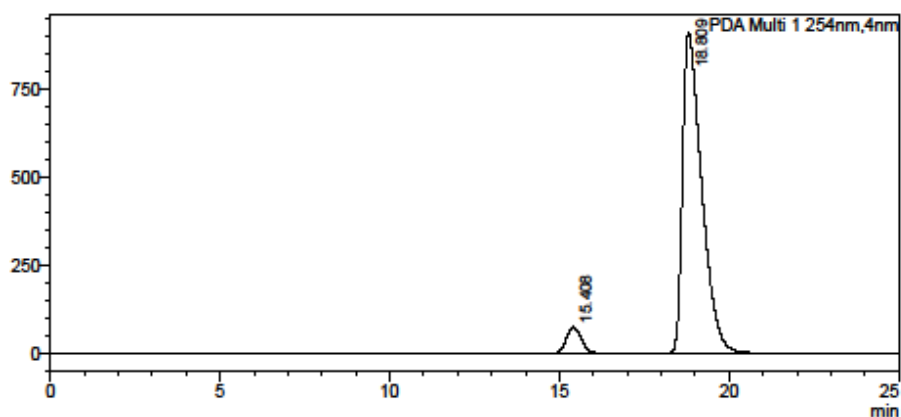

## <Peak Table>

PDA Ch1 254nm

| Peak# | Ret. Time | Area     | Area%   | Height |
|-------|-----------|----------|---------|--------|
| 1     | 15.408    | 2348505  | 6.153   | 75527  |
| 2     | 18.809    | 35817287 | 93.847  | 910271 |
| Total |           | 38165792 | 100.000 | 985798 |

C:\Andrey\CF3(styrenyl)OBnCF3\_old8.lcd

Supplementary figure 298. HPLC chromatogram for compound **8f**, Ligand:(**4R**)-**7g**



# Analysis Report

## <Sample Information>

Sample Name : CF3(styrenyl)OBnCF3\_rac  
 Sample ID : CF3(styrenyl)OBnCF3\_rac  
 Data Filename : CF3(styrenyl)OBnCF3\_rac1.lcd  
 Method Filename : andrey.lcm  
 Batch Filename :  
 Vial # : 1-14  
 Injection Volume : 1 uL  
 Date Acquired : 21/08/2017 19:02:43  
 Date Processed : 21/08/2017 19:28:08

Sample Type : Unknown  
 Acquired by : System Administrator  
 Processed by : System Administrator

## <Chromatogram>

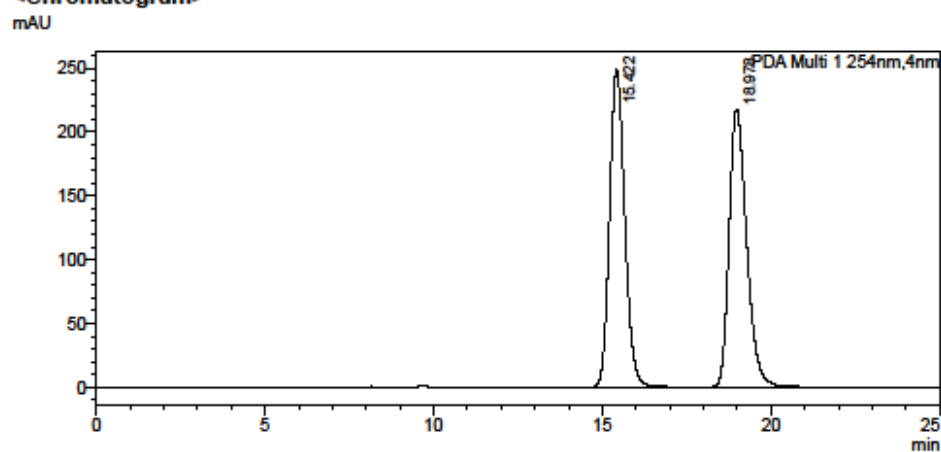

## <Peak Table>

PDA Ch1 254nm

| Peak# | Ret. Time | Area     | Area%   | Height |
|-------|-----------|----------|---------|--------|
| 1     | 15.422    | 7789208  | 49.925  | 248538 |
| 2     | 18.978    | 7812543  | 50.075  | 217751 |
| Total |           | 15601751 | 100.000 | 466289 |

C:\Andrey\CF3(styrenyl)OBnCF3\_rac1.lcd

Supplementary figure 299. HPLC chromatogram for compound **8f**, racemic



# Analysis Report

## <Sample Information>

Sample Name : CF3(vin)O(2-indanyl)  
 Sample ID : CF3(vin)O(2-indanyl)  
 Data Filename : CF3(vin)O(2-indanyl).lcd  
 Method Filename : andrey.lcm  
 Batch Filename :  
 Vial # : 1-85  
 Injection Volume : 1 uL  
 Date Acquired : 08/05/2018 11:16:34  
 Date Processed : 08/05/2018 16:58:41

Sample Type : Unknown  
 Acquired by : System Administrator  
 Processed by : System Administrator

## <Chromatogram>

mAU

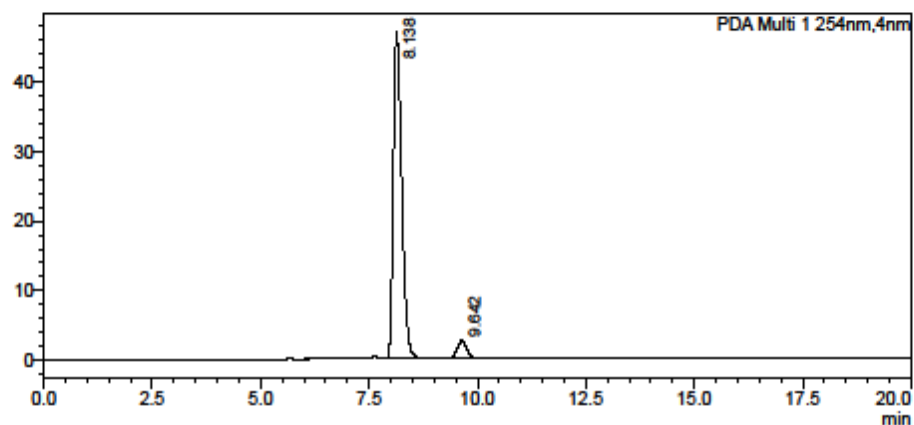

## <Peak Table>

PDA Ch1 254nm

| Peak# | Ret. Time | Area   | Area%   | Height |
|-------|-----------|--------|---------|--------|
| 1     | 8.138     | 632350 | 94.165  | 46951  |
| 2     | 9.642     | 39184  | 5.835   | 2566   |
| Total |           | 671534 | 100.000 | 49518  |

C:\Andrey\CF3(vin)OBnCF4.lcd

Supplementary figure 300. HPLC chromatogram for compound **8g**, Ligand:(**4R**)-**7g**



# Analysis Report

## <Sample Information>

Sample Name : CF3(vinyl)O(2-indanyl)  
 Sample ID : CF3(vinyl)O(2-indanyl)  
 Data Filename : CF3(vinyl)O(2-indanyl)1.lcd  
 Method Filename : andrey.lcm  
 Batch Filename :  
 Vial # : 1-89  
 Injection Volume : 2 uL  
 Date Acquired : 30/04/2018 16:24:02  
 Date Processed : 08/05/2018 17:03:29

Sample Type : Unknown  
 Acquired by : System Administrator  
 Processed by : System Administrator

## <Chromatogram>

mAU

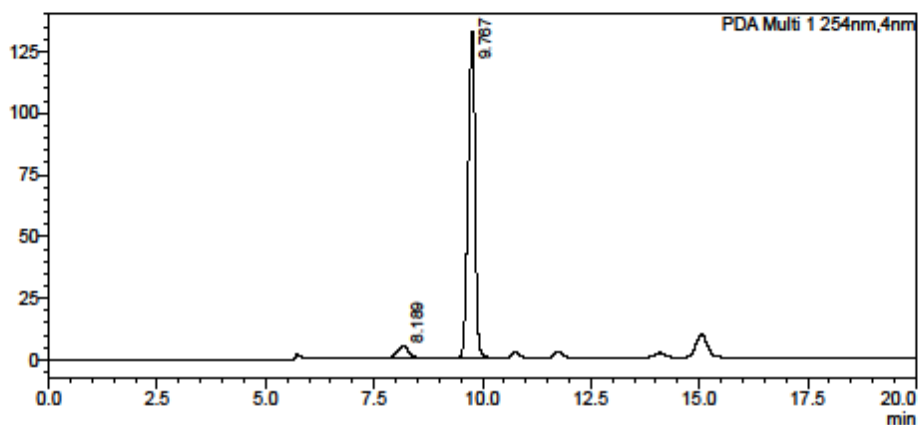

## <Peak Table>

PDA Ch1 254nm

| Peak# | Ret. Time | Area    | Area%   | Height |
|-------|-----------|---------|---------|--------|
| 1     | 8.189     | 83470   | 5.308   | 4459   |
| 2     | 9.767     | 1488965 | 94.692  | 131889 |
| Total |           | 1572435 | 100.000 | 136347 |

C:\Andrey\CF3(vinyl)O(2-indanyl)1.lcd

Supplementary figure 301. HPLC chromatogram for compound **8g**, Ligand:(**4S**)-**7g**



# Analysis Report

## <Sample Information>

Sample Name : CF3(vinyl)O(2-Indanyl)  
 Sample ID : CF3(vinyl)O(2-Indanyl)  
 Data Filename : CF3(vinyl)O(2-Indanyl)\_9.lcd  
 Method Filename : andrey.lcm  
 Batch Filename :  
 Vial # : 1-85  
 Injection Volume : 1 uL  
 Date Acquired : 14/05/2018 14:16:48  
 Date Processed : 18/05/2018 16:19:50

Sample Type : Unknown  
 Acquired by : System Administrator  
 Processed by : System Administrator

## <Chromatogram>

mAU

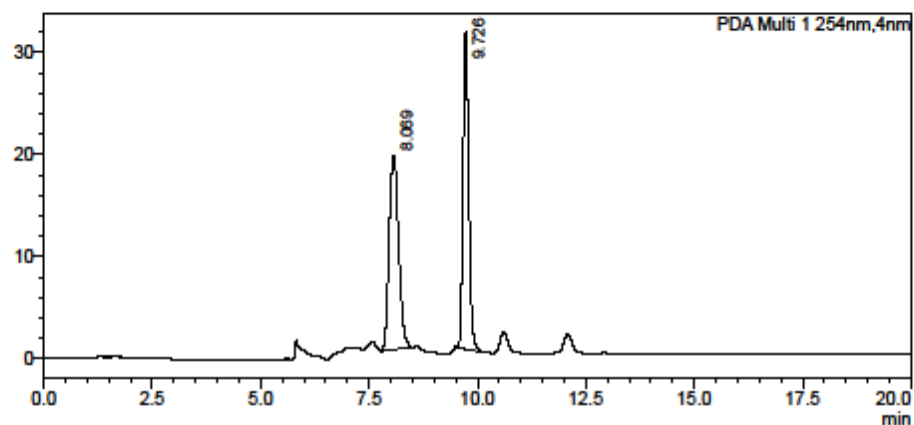

## <Peak Table>

PDA Ch1 254nm

| Peak# | Ret. Time | Area   | Area%   | Height |
|-------|-----------|--------|---------|--------|
| 1     | 8.069     | 289109 | 50.381  | 19048  |
| 2     | 9.726     | 284741 | 49.619  | 30998  |
| Total |           | 573850 | 100.000 | 50046  |

C:\Andrey\CF3(vinyl)O(2-Indanyl)\_9.lcd

Supplementary figure 302. HPLC chromatogram for compound **8f**, racemic



# Analysis Report

**<Sample Information>**

Sample Name : CF3-(Ph)OH, from Bn-CF3  
 Sample ID : CF3-(Ph)OH, from Bn-CF3  
 Data Filename : CF3-(Ph)OH, from Bn-CF3.lcd  
 Method Filename : new.lcm  
 Batch Filename :  
 Vial # : 1-8  
 Injection Volume : 10 uL  
 Date Acquired : 28/01/2017 20:11:01  
 Date Processed : 22/08/2017 15:27:37

Sample Type : Unknown  
 Acquired by : System Administrator  
 Processed by : System Administrator

**<Chromatogram>**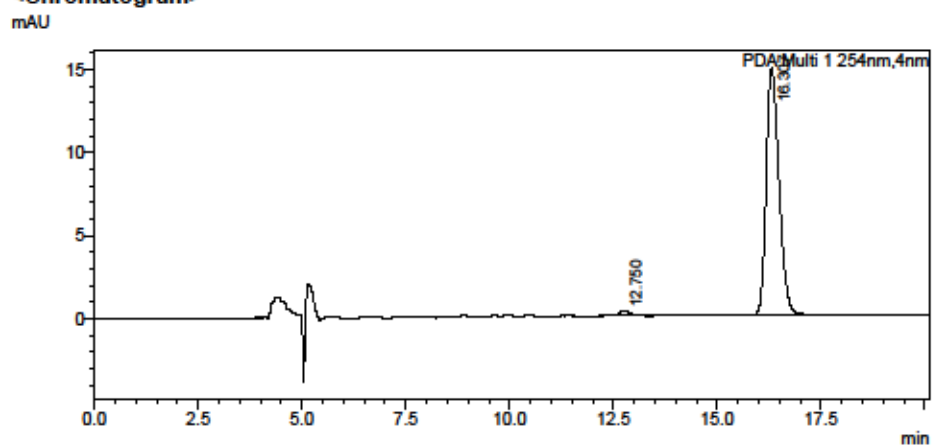**<Peak Table>**

PDA Ch1 254nm

| Peak# | Ret. Time | Area   | Area%   | Height |
|-------|-----------|--------|---------|--------|
| 1     | 12.750    | 4825   | 1.510   | 279    |
| 2     | 16.307    | 314764 | 98.490  | 14822  |
| Total |           | 319589 | 100.000 | 15101  |

C:\Andrey\CF3-(Ph)OH, from Bn-CF3.lcd

**Supplementary figure 303.** HPLC chromatogram for compound **9a**, from **6a** with ligand **(4S,5R)-7a**



# Analysis Report

## <Sample Information>

Sample Name : R-CF3-(Ph)OH, ref  
 Sample ID : R-CF3-(Ph)OH, ref  
 Data Filename : R-CF3-(Ph)OH, ref2.lcd  
 Method Filename : new.lcm  
 Batch Filename :  
 Vial # : 1-7  
 Injection Volume : 10 uL  
 Date Acquired : 28/01/2017 19:51:10  
 Date Processed : 22/08/2017 15:29:41

Sample Type : Unknown  
 Acquired by : System Administrator  
 Processed by : System Administrator

## <Chromatogram>

mAU

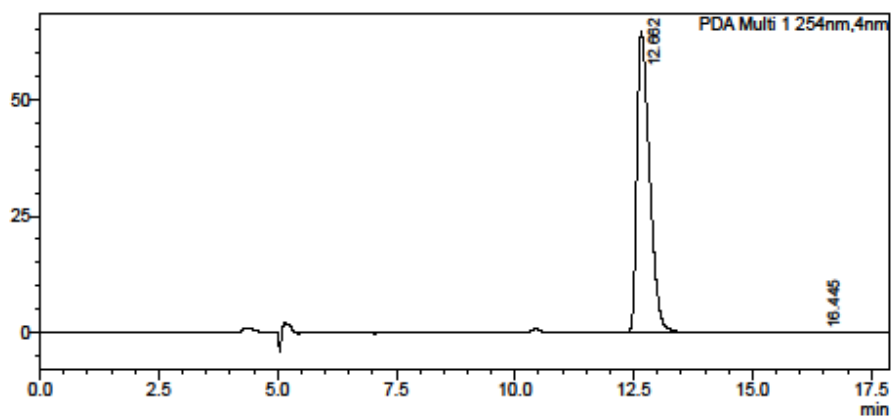

## <Peak Table>

PDA Ch1 254nm

| Peak# | Ret. Time | Area    | Area%   | Height |
|-------|-----------|---------|---------|--------|
| 1     | 12.662    | 1189678 | 99.872  | 64448  |
| 2     | 16.445    | 1519    | 0.128   | 78     |
| Total |           | 1191197 | 100.000 | 64524  |

C:\Andrey\IR-CF3-(Ph)OH, ref2.lcd

Supplementary figure 304. HPLC chromatogram for compound: commercial (R)-9a





# Analysis Report

**<Sample Information>**

Sample Name : CF3(OH)-styrenyl  
 Sample ID : CF3(OH)-styrenyl  
 Data Filename : CF3(OH)-styrenyl2.lcd  
 Method Filename : shutdown.lcm  
 Batch Filename :  
 Vial # : 1-102  
 Injection Volume : 2 uL  
 Date Acquired : 02/07/2017 18:50:55  
 Date Processed : 22/08/2017 15:34:56

Sample Type : Unknown  
 Acquired by : System Administrator  
 Processed by : System Administrator

**<Chromatogram>**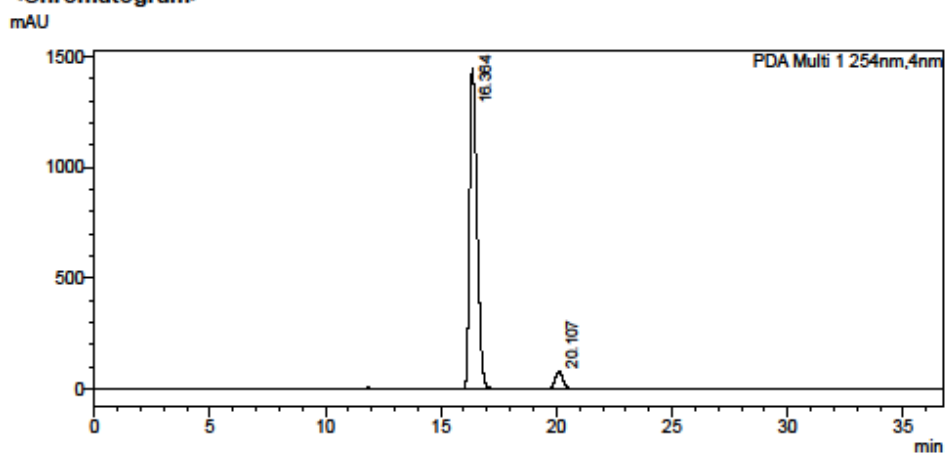**<Peak Table>**

PDA Ch1 254nm

| Peak# | Ret. Time | Area     | Area%   | Height  |
|-------|-----------|----------|---------|---------|
| 1     | 16.364    | 32477253 | 94.575  | 1443248 |
| 2     | 20.107    | 1862981  | 5.425   | 76596   |
| Total |           | 34340235 | 100.000 | 1519843 |

C:\Andrey\CF3(OH)-styrenyl2.lcd

Supplementary figure 305. HPLC chromatogram for compound: **9b**, from **8c** with ligand **(4R)-7g**



# Analysis Report

## <Sample Information>

Sample Name : CF3(OH)CH2CH2Ph  
 Sample ID : CF3(OH)CH2CH2Ph  
 Data Filename : CF3(OH)CH2CH2Ph7.lcd  
 Method Filename : andrey.lcm  
 Batch Filename :  
 Vial # : 1-32  
 Injection Volume : 3 uL  
 Date Acquired : 20/11/2017 09:44:55  
 Date Processed : 31/12/2017 15:24:30

Sample Type : Unknown  
 Acquired by : System Administrator  
 Processed by : System Administrator

## <Chromatogram>

mAU

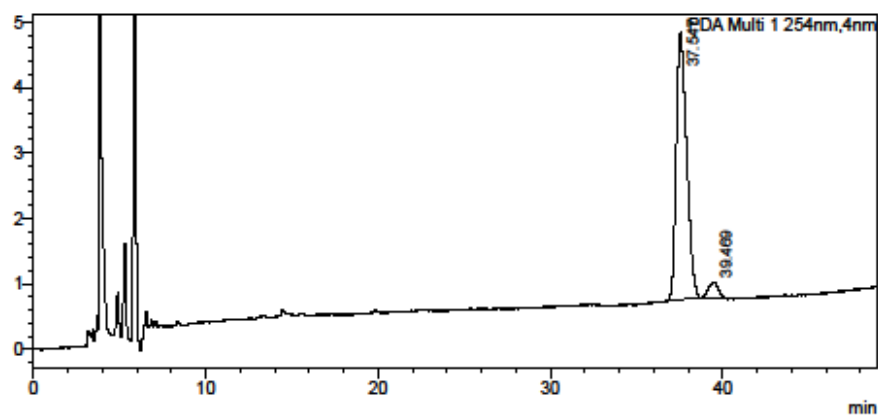

## <Peak Table>

PDA Ch1 254nm

| Peak# | Ret. Time | Area   | Area%   | Height |
|-------|-----------|--------|---------|--------|
| 1     | 37.547    | 171147 | 94.762  | 4082   |
| 2     | 39.469    | 9460   | 5.238   | 248    |
| Total |           | 180606 | 100.000 | 4330   |

C:\Andrey\CF3(OH)CH2CH2Ph7.lcd

Supplementary figure 306. HPLC chromatogram for compound **9c**, from **8f** with ligand (**4R**)-**7g**



# Analysis Report

## <Sample Information>

Sample Name : CF3(p-MeOPh)-OCH2CH2OBu  
 Sample ID : CF3(p-MeOPh)-OCH2CH2OBu  
 Data Filename : CF3(p-MeOPh)-OCH2CH2OBu14.lcd  
 Method Filename : andrey.lcm  
 Batch Filename :  
 Vial # : 1-87  
 Injection Volume : 2 uL  
 Date Acquired : 11/07/2017 11:21:20  
 Date Processed : 21/08/2017 16:26:00

Sample Type : Unknown  
 Acquired by : System Administrator  
 Processed by : System Administrator

## <Chromatogram>

mAU

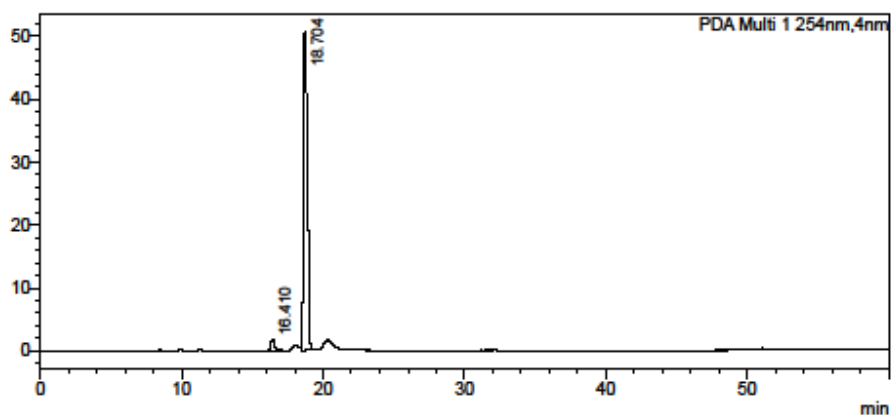

## <Peak Table>

PDA Ch1 254nm

| Peak# | Ret. Time | Area   | Area%   | Height |
|-------|-----------|--------|---------|--------|
| 1     | 16.410    | 33137  | 3.314   | 1847   |
| 2     | 18.704    | 966714 | 96.686  | 50535  |
| Total |           | 999851 | 100.000 | 52382  |

C:\Andrey\CF3(p-MeOPh)-OCH2CH2OBu14.lcd

Supplementary figure 307. HPLC chromatogram for compound **11a**, Ligand:(**4S,5R**)-**7a**



# Analysis Report

**<Sample Information>**

Sample Name : CF3(p-MeOPh)-OCH<sub>2</sub>CH<sub>2</sub>OBu  
 Sample ID : CF3(p-MeOPh)-OCH<sub>2</sub>CH<sub>2</sub>OBu  
 Data Filename : CF3(p-MeOPh)-OCH<sub>2</sub>CH<sub>2</sub>OBu13.lcd  
 Method Filename : andrey.lcm  
 Batch Filename :  
 Vial # : 1-86  
 Injection Volume : 2 uL  
 Date Acquired : 11/07/2017 10:20:43  
 Date Processed : 21/08/2017 16:29:10

Sample Type : Unknown  
 Acquired by : System Administrator  
 Processed by : System Administrator

**<Chromatogram>**

mAU

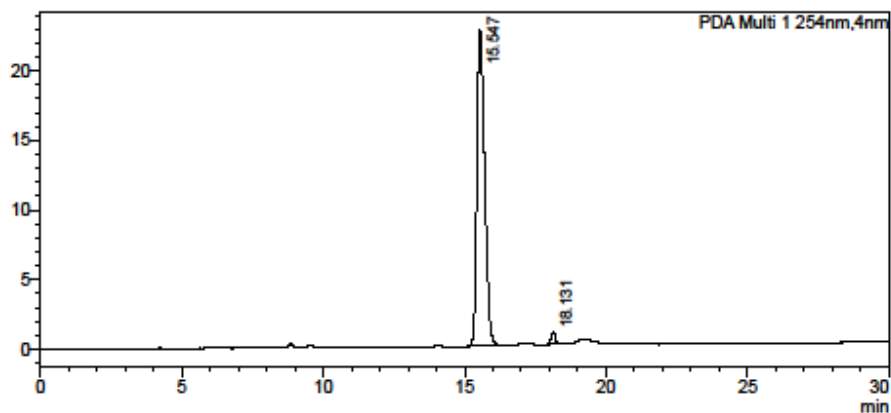**<Peak Table>**

PDA Ch1 254nm

| Peak# | Ret. Time | Area   | Area%   | Height |
|-------|-----------|--------|---------|--------|
| 1     | 15.547    | 426781 | 97.935  | 22862  |
| 2     | 18.131    | 8998   | 2.065   | 856    |
| Total |           | 435780 | 100.000 | 23518  |

C:\Andrey\CF3(p-MeOPh)-OCH<sub>2</sub>CH<sub>2</sub>OBu13.lcdSupplementary figure 308. HPLC chromatogram for compound **11a**, Ligand:(**4R,5S**)-**7a**

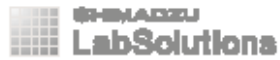

# Analysis Report

## <Sample Information>

Sample Name : CF3(p-MeOPh)-OCH2CH2OBu  
 Sample ID : CF3(p-MeOPh)-OCH2CH2OBu  
 Data Filename : CF3(p-MeOPh)-OCH2CH2OBu18.lcd  
 Method Filename : andrey.lcm  
 Batch Filename :  
 Vial # : 1-76  
 Injection Volume : 2 uL  
 Date Acquired : 11/07/2017 15:46:49  
 Date Processed : 13/08/2017 16:05:24

Sample Type : Unknown  
 Acquired by : System Administrator  
 Processed by : System Administrator

## <Chromatogram>

mAU

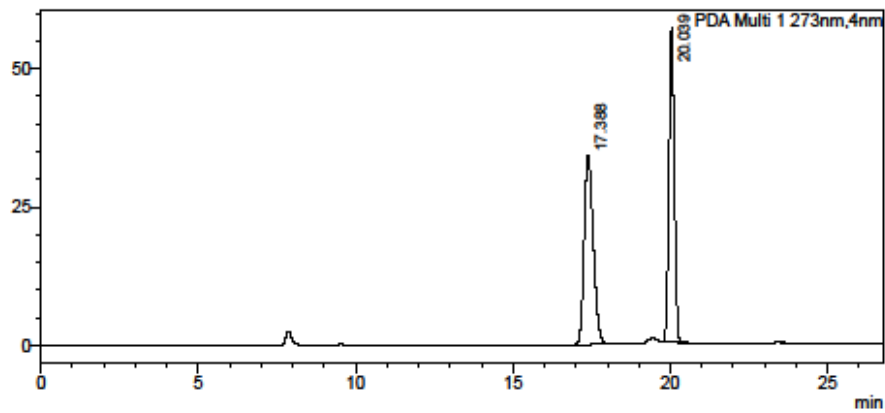

## <Peak Table>

PDA Ch1 273nm

| Peak# | Ret. Time | Area    | Area%   | Height |
|-------|-----------|---------|---------|--------|
| 1     | 17.388    | 688475  | 50.455  | 34190  |
| 2     | 20.039    | 676060  | 49.545  | 56718  |
| Total |           | 1364534 | 100.000 | 90908  |

C:\Andrey\CF3(p-MeOPh)-OCH2CH2OBu18.lcd

Supplementary figure 309. HPLC chromatogram for compound **11a**, racemic



# Analysis Report

## <Sample Information>

Sample Name : CF3(p-MeOPh)-O(8-EtOhexanoyl)  
 Sample ID : CF3(p-MeOPh)-O(8-EtOhexanoyl)  
 Data Filename : CF3(p-MeOPh)-O(8-EtOhexanoyl)2.lcd  
 Method Filename : andrey.lcm  
 Batch Filename :  
 Vial # : 1-85  
 Injection Volume : 2 uL  
 Date Acquired : 09/07/2017 20:42:28  
 Date Processed : 10/07/2017 17:48:33

Sample Type : Unknown  
 Acquired by : System Administrator  
 Processed by : System Administrator

## <Chromatogram>

mAU

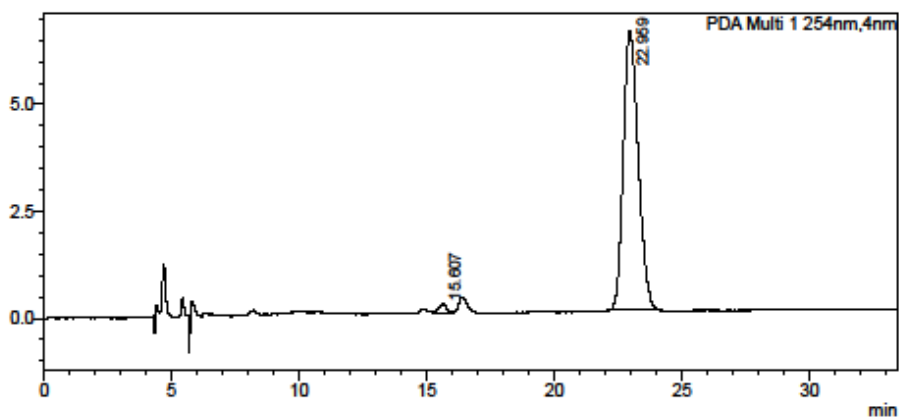

## <Peak Table>

PDA Ch1 254nm

| Peak# | Ret. Time | Area   | Area%   | Height |
|-------|-----------|--------|---------|--------|
| 1     | 15.607    | 4300   | 1.597   | 203    |
| 2     | 22.959    | 264907 | 98.403  | 6491   |
| Total |           | 269207 | 100.000 | 6694   |

C:\Andrey\CF3(p-MeOPh)-O(8-EtOhexanoyl)2.lcd

Supplementary figure 310. HPLC chromatogram for compound **11b**, Ligand:(**4S,5R**)-**7a**



# Analysis Report

## <Sample Information>

Sample Name : CF3(p-MeO)-O(6-EtOhexanoyl),Me(4,5diPh)\_BOX  
 Sample ID : CF3(p-MeO)-O(6-EtOhexanoyl),Me(  
 Data Filename : CF3(p-MeO)-O(6-EtOhexanoyl),Me(4,5diPh)\_BOX2.lcd  
 Method Filename : andrey.lcm  
 Batch Filename :  
 Vial # : 1-49  
 Injection Volume : 5 uL  
 Date Acquired : 21/05/2017 15:35:33  
 Date Processed : 10/07/2017 17:49:33

Sample Type : Unknown  
 Acquired by : System Administrator  
 Processed by : System Administrator

## <Chromatogram>

mAU

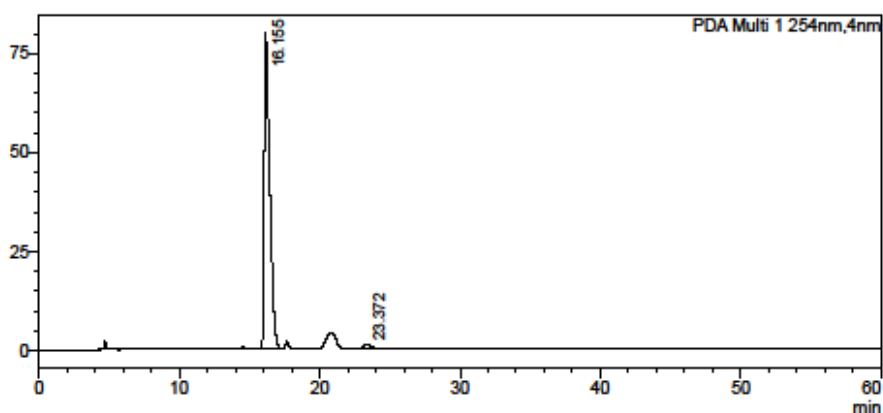

## <Peak Table>

PDA Ch1 254nm

| Peak# | Ret. Time | Area    | Area%   | Height |
|-------|-----------|---------|---------|--------|
| 1     | 16.155    | 2201271 | 98.053  | 79787  |
| 2     | 23.372    | 43720   | 1.947   | 1080   |
| Total |           | 2244992 | 100.000 | 80867  |

C:\Andrey\CF3(p-MeO)-O(6-EtOhexanoyl),Me(4,5diPh)\_BOX2.lcd

Supplementary figure 311. HPLC chromatogram for compound **11b**, Ligand:(**4R,5S**)-**7a**



# Analysis Report

## <Sample Information>

Sample Name : CF3(p-MeOPh)-O(CH<sub>2</sub>)<sub>5</sub>COOEt\_rac  
 Sample ID : CF3(p-MeOPh)-O(CH<sub>2</sub>)<sub>5</sub>COOEt\_rac  
 Data Filename : CF3(p-MeOPh)-O(CH<sub>2</sub>)<sub>5</sub>COOEt\_rac2.lcd  
 Method Filename : andrey.lcm  
 Batch Filename :  
 Vial # : 1-78  
 Injection Volume : 2 uL  
 Date Acquired : 12/07/2017 14:48:52  
 Date Processed : 13/08/2017 16:02:48

Sample Type : Unknown  
 Acquired by : System Administrator  
 Processed by : System Administrator

## <Chromatogram>

mAU

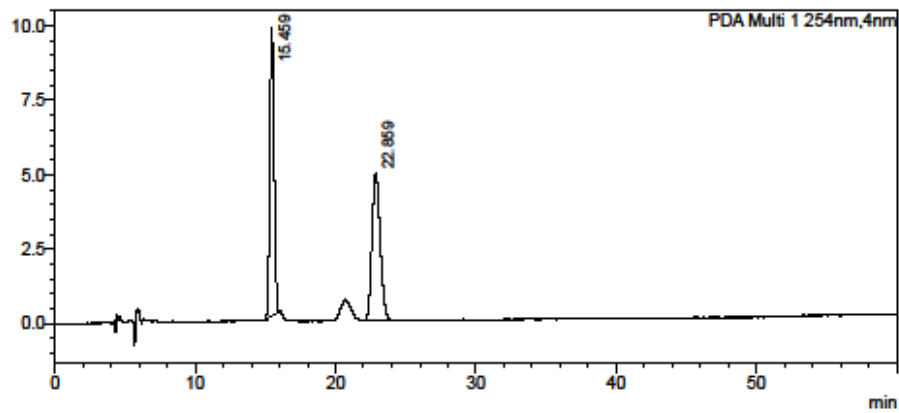

## <Peak Table>

PDA Ch1 254nm

| Peak# | Ret. Time | Area   | Area%   | Height |
|-------|-----------|--------|---------|--------|
| 1     | 15.459    | 205310 | 50.589  | 9664   |
| 2     | 22.859    | 200527 | 49.411  | 4932   |
| Total |           | 405837 | 100.000 | 14596  |

C:\Andrey\CF3(p-MeOPh)-O(CH<sub>2</sub>)<sub>5</sub>COOEt\_rac2.lcd

Supplementary figure 312. HPLC chromatogram for compound **11b**, racemic





# Analysis Report

## <Sample Information>

Sample Name : CF3(p-MeOPh)-(CH<sub>2</sub>)<sub>3</sub>NHBoc  
 Sample ID : CF3(p-MeOPh)-(CH<sub>2</sub>)<sub>3</sub>NHBoc  
 Data Filename : CF3(p-MeOPh)-(CH<sub>2</sub>)<sub>3</sub>NHBoc3.lcd  
 Method Filename : andrey.lcm  
 Batch Filename :  
 Vial # : 1-81  
 Injection Volume : 2 uL  
 Date Acquired : 13/07/2017 17:31:27  
 Date Processed : 13/07/2017 21:48:05

Sample Type : Unknown  
 Acquired by : System Administrator  
 Processed by : System Administrator

## <Chromatogram>

mAU

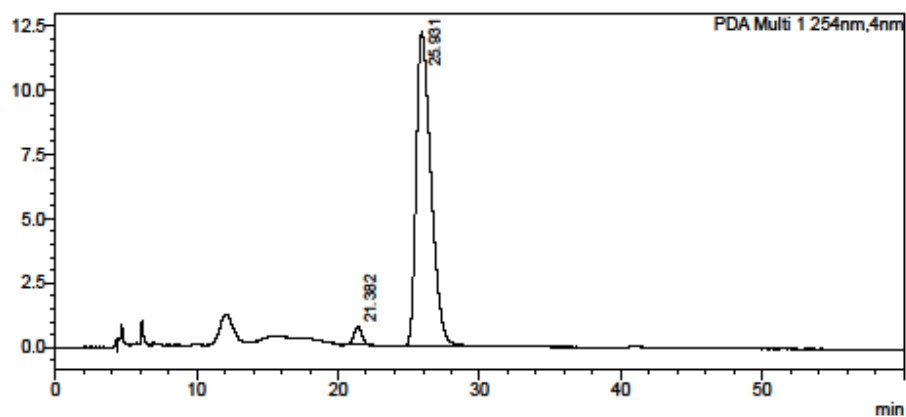

## <Peak Table>

PDA Ch1 254nm

| Peak# | Ret. Time | Area   | Area%   | Height |
|-------|-----------|--------|---------|--------|
| 1     | 21.382    | 28674  | 3.123   | 702    |
| 2     | 25.931    | 889632 | 96.877  | 12219  |
| Total |           | 918306 | 100.000 | 12921  |

C:\Andrey\CF3(p-MeOPh)-(CH<sub>2</sub>)<sub>3</sub>NHBoc3.lcd

Supplementary figure 313. HPLC chromatogram for compound **11c**, Ligand:(**4S,5R**)-**7a**



# Analysis Report

**<Sample Information>**

Sample Name : CF3(p-MeOPh)-(CH<sub>2</sub>)<sub>3</sub>NHBoc  
 Sample ID : CF3(p-MeOPh)-(CH<sub>2</sub>)<sub>3</sub>NHBoc  
 Data Filename : CF3(p-MeOPh)-(CH<sub>2</sub>)<sub>3</sub>NHBoc2.lcd  
 Method Filename : andrey.lcm  
 Batch Filename :  
 Vial # : 1-80  
 Injection Volume : 2 uL  
 Date Acquired : 13/07/2017 16:32:47  
 Date Processed : 21/08/2017 16:54:44

Sample Type : Unknown  
 Acquired by : System Administrator  
 Processed by : System Administrator

**<Chromatogram>**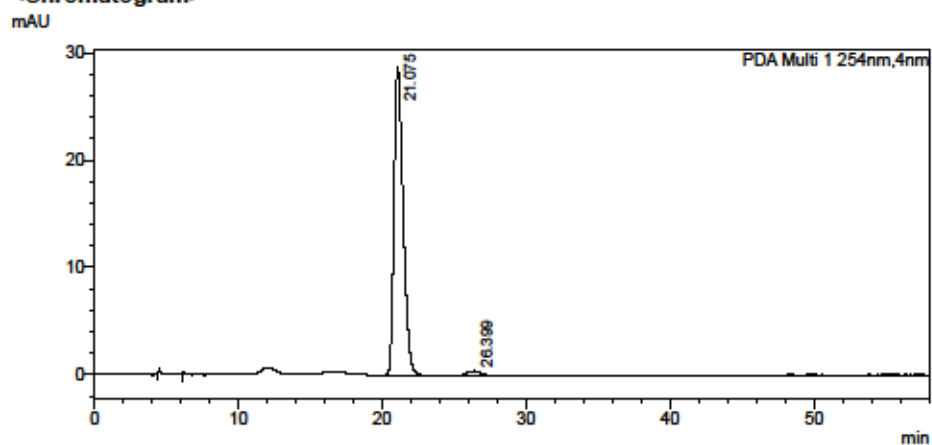**<Peak Table>**

PDA Ch1 254nm

| Peak# | Ret. Time | Area    | Area%   | Height |
|-------|-----------|---------|---------|--------|
| 1     | 21.075    | 1267304 | 97.507  | 28783  |
| 2     | 26.399    | 32402   | 2.493   | 459    |
| Total |           | 1299706 | 100.000 | 29222  |

C:\Andrey\CF3(p-MeOPh)-(CH<sub>2</sub>)<sub>3</sub>NHBoc2.lcd

Supplementary figure 314. HPLC chromatogram for compound **11c**, Ligand: **(4R,5S)-7a**



# Analysis Report

## <Sample Information>

Sample Name : CF3(pMeOPh)O(CH2)3NHBoc\_rac  
 Sample ID : CF3(pMeOPh)O(CH2)3NHBoc\_rac  
 Data Filename : CF3(pMeOPh)O(CH2)3NHBoc\_rac1.lcd  
 Method Filename : andrey.lcm  
 Batch Filename :  
 Vial # : 1-96  
 Injection Volume : 3 uL  
 Date Acquired : 10/08/2017 17:32:55  
 Date Processed : 10/08/2017 18:11:29

Sample Type : Unknown  
 Acquired by : System Administrator  
 Processed by : System Administrator

## <Chromatogram>

mAU

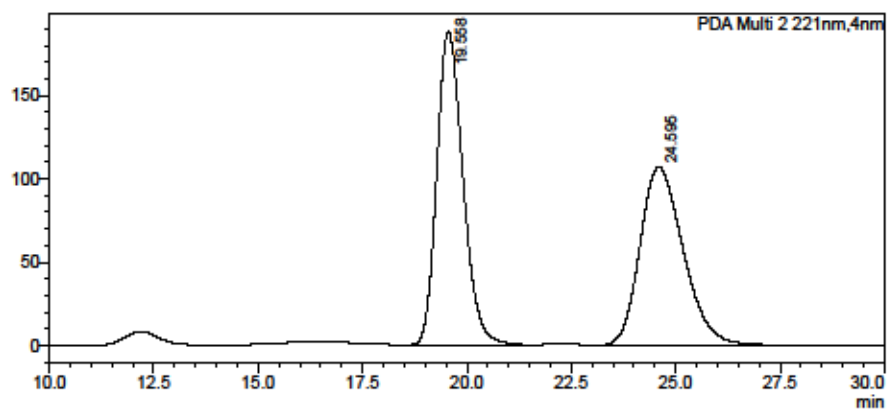

## <Peak Table>

PDA Ch2 221nm

| Peak# | Ret. Time | Area     | Area%   | Height |
|-------|-----------|----------|---------|--------|
| 1     | 19.558    | 8195128  | 51.424  | 188162 |
| 2     | 24.595    | 7741165  | 48.576  | 107180 |
| Total |           | 15936291 | 100.000 | 295342 |

C:\Andrey\CF3(pMeOPh)O(CH2)3NHBoc\_rac1.lcd

Supplementary figure 315. HPLC chromatogram for compound: **11c**, racemic



# Analysis Report

**<Sample Information>**

Sample Name : CF3(p-MeOPh)-dec\_old  
 Sample ID : CF3(p-MeOPh)-dec\_old  
 Data Filename : CF3(p-MeOPh)-dec\_old3.lcd  
 Method Filename : andrey.lcm  
 Batch Filename :  
 Vial # : 1-79  
 Injection Volume : 2 uL  
 Date Acquired : 12/07/2017 19:14:39  
 Date Processed : 21/08/2017 16:58:12

Sample Type : Unknown  
 Acquired by : System Administrator  
 Processed by : System Administrator

**<Chromatogram>**

mAU

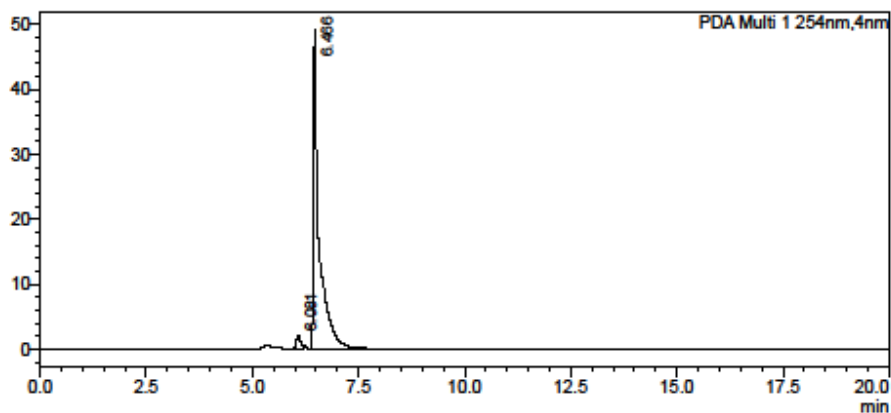**<Peak Table>**

PDA Ch1 254nm

| Peak# | Ret. Time | Area   | Area%   | Height |
|-------|-----------|--------|---------|--------|
| 1     | 6.081     | 13670  | 2.988   | 2042   |
| 2     | 6.466     | 443841 | 97.012  | 49039  |
| Total |           | 457510 | 100.000 | 51081  |

C:\Andrey\CF3(p-MeOPh)-dec\_old3.lcd

Supplementary figure 316. HPLC chromatogram for compound **11d**, Ligand:(**4S,5R**)-**7a**



# Analysis Report

## <Sample Information>

Sample Name : CF3(p-MeOPh)-ODec Me(4.5DiPh)BOX  
 Sample ID : CF3(p-MeOPh)-ODec Me(4.5DiPh)BO  
 Data Filename : CF3(p-MeOPh)-ODec Me(4.5DiPh)BOX13.lcd  
 Method Filename : andrey.lcm  
 Batch Filename :  
 Vial # : 1-58  
 Injection Volume : 2 uL  
 Date Acquired : 12/06/2017 19:02:08  
 Date Processed : 21/08/2017 16:59:43

Sample Type : Unknown  
 Acquired by : System Administrator  
 Processed by : System Administrator

## <Chromatogram>

mAU

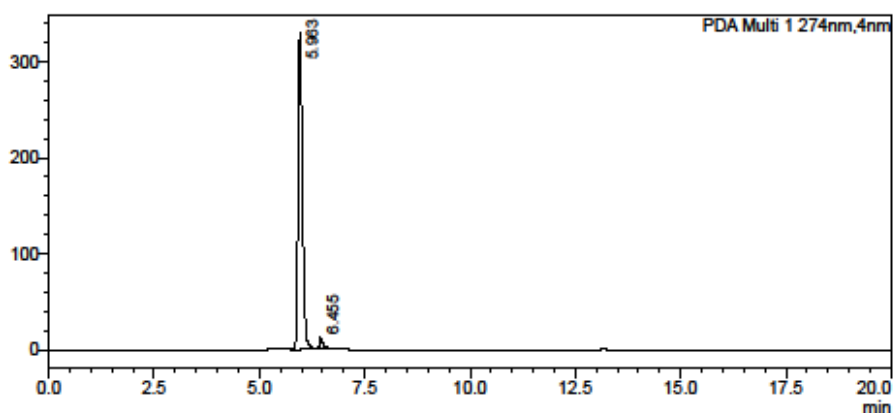

## <Peak Table>

PDA.Ch1 274nm

| Peak# | Ret. Time | Area    | Area%   | Height |
|-------|-----------|---------|---------|--------|
| 1     | 5.963     | 2343179 | 97.032  | 329134 |
| 2     | 6.455     | 71684   | 2.968   | 11700  |
| Total |           | 2414863 | 100.000 | 340834 |

C:\Andrey\CF3(p-MeOPh)-ODec Me(4.5DiPh)BOX13.lcd

Supplementary figure 317. HPLC chromatogram for compound **11d**, Ligand:(**4R,5S**)-**7a**

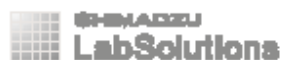

# Analysis Report

## <Sample Information>

Sample Name : CF3(pMeOPh)ODec  
 Sample ID : CF3(pMeOPh)ODec  
 Data Filename : CF3(pMeOPh)ODec\_rac1.lcd  
 Method Filename : andrey.lcm  
 Batch Filename :  
 Vial # : 1-97  
 Injection Volume : 2 uL  
 Date Acquired : 10/08/2017 15:45:53  
 Date Processed : 10/08/2017 18:06:03

Sample Type : Unknown  
 Acquired by : System Administrator  
 Processed by : System Administrator

## <Chromatogram>

mAU

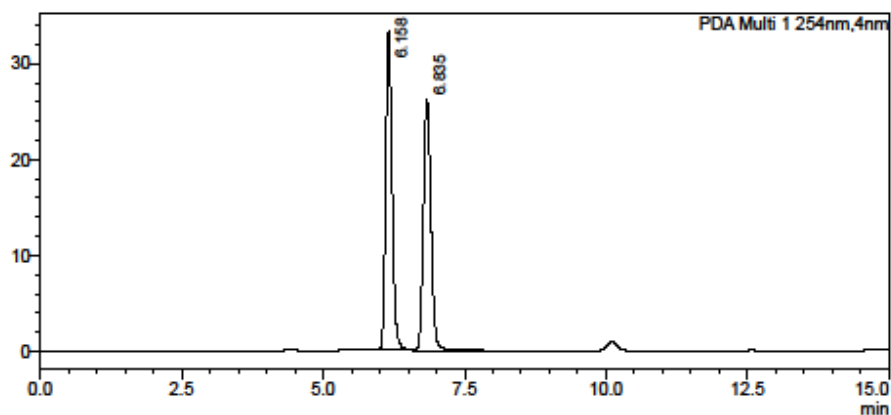

## <Peak Table>

PDA Ch1 254nm

| Peak# | Ret. Time | Area   | Area%   | Height |
|-------|-----------|--------|---------|--------|
| 1     | 6.158     | 261092 | 51.904  | 33242  |
| 2     | 6.835     | 241935 | 48.096  | 26225  |
| Total |           | 503027 | 100.000 | 59467  |

C:\Andrey\CF3(pMeOPh)ODec\_rac1.lcd

Supplementary figure 318. HPLC chromatogram for compound **11d**, racemic



# Analysis Report

## <Sample Information>

Sample Name : CF3(pMeOPh)O(2-indanyl)  
 Sample ID : CF3(pMeOPh)O(2-indanyl)  
 Data Filename : CF3(pMeOPh)O(2-indanyl)\_r1.lcd  
 Method Filename : Cholest.lcm  
 Batch Filename :  
 Vial # : 1-97  
 Injection Volume : 1 uL  
 Date Acquired : 19/05/2018 19:15:15  
 Date Processed : 19/05/2018 19:43:57

Sample Type : Unknown  
 Acquired by : System Administrator  
 Processed by : System Administrator

## <Chromatogram>

mAU

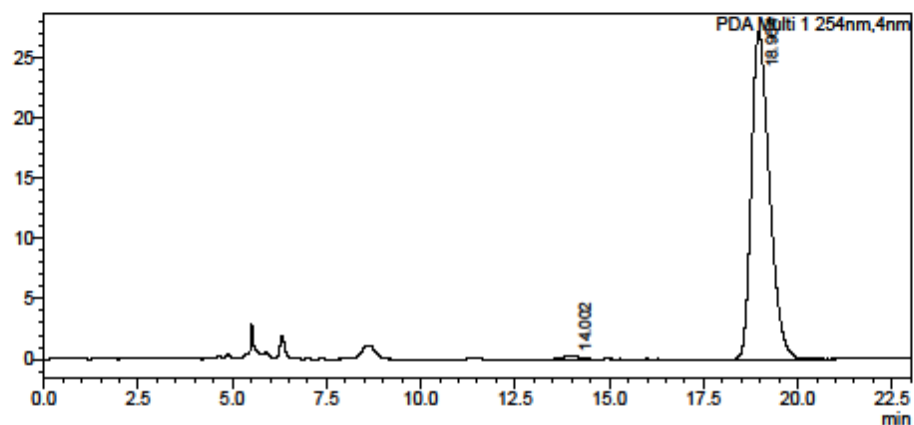

## <Peak Table>

PDA Ch1 254nm

| Peak# | Ret. Time | Area   | Area%   | Height |
|-------|-----------|--------|---------|--------|
| 1     | 14.002    | 8237   | 0.903   | 314    |
| 2     | 18.964    | 904264 | 99.097  | 27093  |
| Total |           | 912501 | 100.000 | 27406  |

C:\Andrey\CF3(pMeOPh)O(2-indanyl)\_r1.lcd

Supplementary figure 319. HPLC chromatogram for compound 11e, Ligand:(4R,5S)-7a



# Analysis Report

## <Sample Information>

Sample Name : CF3(pMeOPh)O(2-indanyl)  
 Sample ID : CF3(pMeOPh)O(2-indanyl)  
 Data Filename : CF3(pMeOPh)O(2-indanyl)\_s1.lcd  
 Method Filename : Cholest.lcm  
 Batch Filename :  
 Vial # : 1-95  
 Injection Volume : 1 uL  
 Date Acquired : 19/05/2018 18:21:04  
 Date Processed : 19/05/2018 19:12:12

Sample Type : Unknown  
 Acquired by : System Administrator  
 Processed by : System Administrator

## <Chromatogram>

mAU

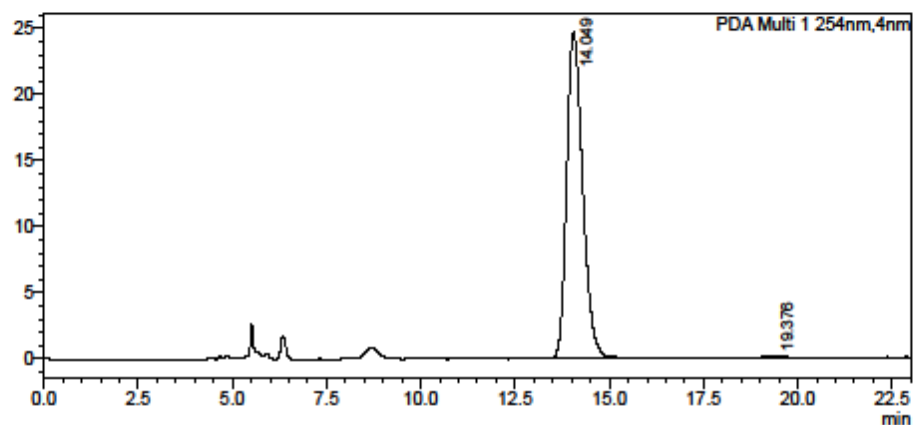

## <Peak Table>

PDA Ch1 254nm

| Peak# | Ret. Time | Area   | Area%   | Height |
|-------|-----------|--------|---------|--------|
| 1     | 14.049    | 728111 | 99.351  | 24851  |
| 2     | 19.376    | 4741   | 0.649   | 162    |
| Total |           | 730851 | 100.000 | 24813  |

C:\Andrey\CF3(pMeOPh)O(2-indanyl)\_s1.lcd

Supplementary figure 320. HPLC chromatogram for compound 11e, Ligand:(4S,5R)-7a





# Analysis Report

## <Sample Information>

Sample Name : CF3(pMeOPh)O(2-indanyl)  
 Sample ID : CF3(pMeOPh)O(2-indanyl)  
 Data Filename : CF3(pMeOPh)O(2-indanyl)\_rac1.lcd  
 Method Filename : Cholest.lcm  
 Batch Filename :  
 Vial # : 1-98  
 Injection Volume : 1 uL  
 Date Acquired : 19/05/2018 18:48:04  
 Date Processed : 19/05/2018 19:38:34

Sample Type : Unknown  
 Acquired by : System Administrator  
 Processed by : System Administrator

## <Chromatogram>

mAU

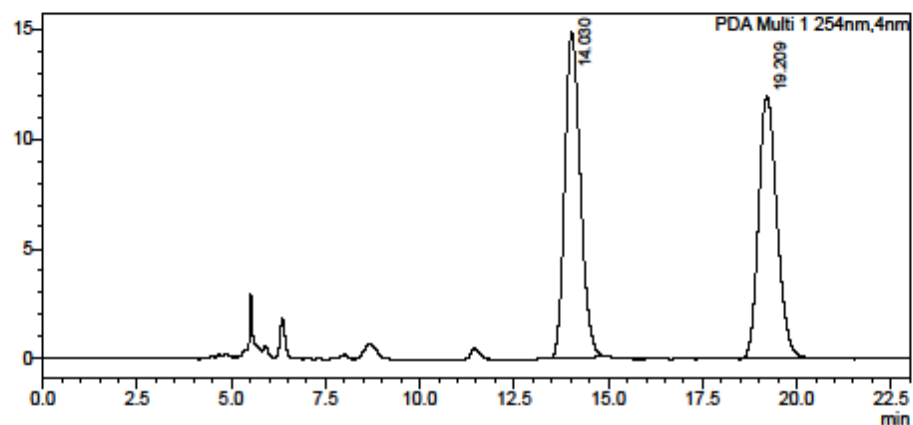

## <Peak Table>

PDA Ch1 254nm

| Peak# | Ret. Time | Area   | Area%   | Height |
|-------|-----------|--------|---------|--------|
| 1     | 14.030    | 427500 | 51.495  | 14839  |
| 2     | 19.209    | 402672 | 48.505  | 11953  |
| Total |           | 830172 | 100.000 | 26792  |

C:\Andrey\CF3(pMeOPh)O(2-indanyl)\_rac1.lcd

Supplementary figure 321. HPLC chromatogram for compound 11e, racemic



# Analysis Report

## <Sample Information>

Sample Name : CF3(pMeOPh)O(Cholesterol)  
 Sample ID : CF3(pMeOPh)O(Cholesterol)  
 Data Filename : CF3(pMeOPh)O(Cholesterol)\_r7.lcd  
 Method Filename : andrey.lcm  
 Batch Filename :  
 Vial # : 1-104  
 Injection Volume : 1 uL  
 Date Acquired : 18/05/2018 18:39:11  
 Date Processed : 18/05/2018 16:27:53

Sample Type : Unknown  
 Acquired by : System Administrator  
 Processed by : System Administrator

## <Chromatogram>

mAU

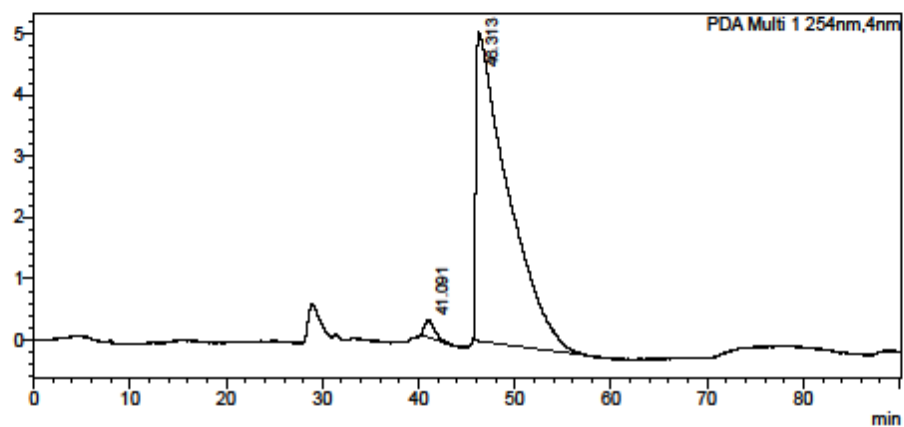

## <Peak Table>

PDA Ch1 254nm

| Peak# | Ret. Time | Area    | Area%   | Height |
|-------|-----------|---------|---------|--------|
| 1     | 41.091    | 20443   | 1.733   | 281    |
| 2     | 46.313    | 1159302 | 98.267  | 5044   |
| Total |           | 1179745 | 100.000 | 5326   |

C:\Andrey\CF3(pMeOPh)O(Cholesterol)\_r7.lcd

Supplementary figure 322. HPLC chromatogram for compound 11f, Ligand:(4R,5S)-7a



# Analysis Report

## <Sample Information>

Sample Name : CF3(p-MeOPh)O(Cholesterol)\_ (S)  
 Sample ID : CF3(p-MeOPh)O(Cholesterol)\_ (S)  
 Data Filename : CF3(p-MeOPh)O(Cholesterol)\_ (S)\_1.lcd  
 Method Filename : andrey.lcm  
 Batch Filename : 1.lcb  
 Vial # : 1-103  
 Injection Volume : 1 uL  
 Date Acquired : 18/05/2018 20:14:20  
 Date Processed : 18/05/2018 16:24:18

Sample Type : Unknown  
 Acquired by : System Administrator  
 Processed by : System Administrator

## <Chromatogram>

mAU

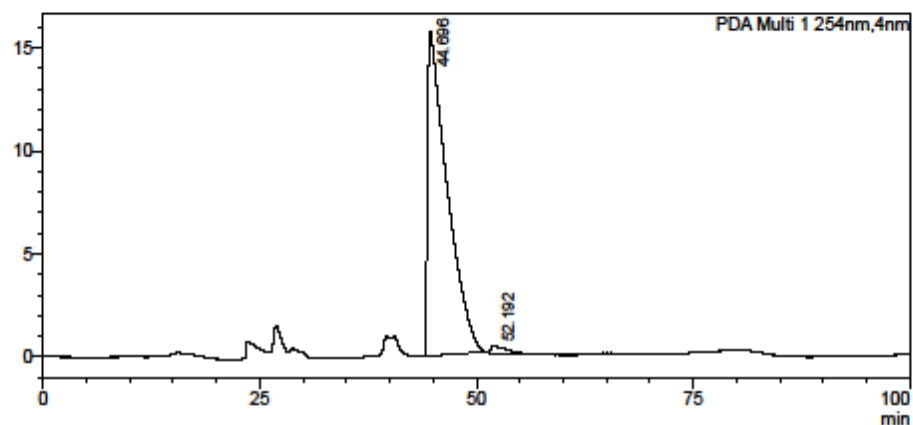

## <Peak Table>

PDA Ch1 254nm

| Peak# | Ret. Time | Area    | Area%   | Height |
|-------|-----------|---------|---------|--------|
| 1     | 44.696    | 2470279 | 98.129  | 15704  |
| 2     | 52.192    | 47091   | 1.871   | 335    |
| Total |           | 2517369 | 100.000 | 16038  |

C:\Andrey\CF3(p-MeOPh)O(Cholesterol)\_ (S)\_1.lcd

Supplementary figure 323. HPLC chromatogram for compound 11f, Ligand:(4S,5R)-7a



# Analysis Report

## <Sample Information>

Sample Name : CF3(p-MeOPh)O(Cholesterol)\_rac  
 Sample ID : CF3(p-MeOPh)O(Cholesterol)\_rac  
 Data Filename : CF3(p-MeOPh)O(Cholesterol)\_rac\_1.lcd  
 Method Filename : andrey.lcm  
 Batch Filename : 1.lcb  
 Vial # : 1-102  
 Injection Volume : 1 uL  
 Date Acquired : 18/05/2018 21:54:46  
 Date Processed : 18/05/2018 16:25:55  
 Sample Type : Unknown  
 Acquired by : System Administrator  
 Processed by : System Administrator

## <Chromatogram>

mAU

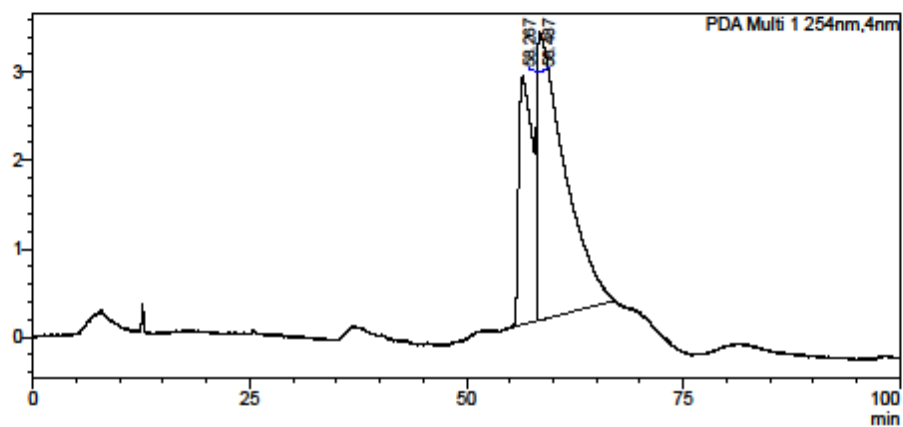

## <Peak Table>

PDA Ch1 254nm

| Peak# | Ret. Time | Area    | Area%   | Height |
|-------|-----------|---------|---------|--------|
| 1     | 58.267    | 343325  | 33.520  | 3081   |
| 2     | 58.487    | 680929  | 66.480  | 3257   |
| Total |           | 1024254 | 100.000 | 6339   |

C:\Andrey\CF3(p-MeOPh)O(Cholesterol)\_rac\_1.lcd

Supplementary figure 324. HPLC chromatogram for compound 11f,; racemic

## Supplementary references

1. Handy C. J., Lam Y.-F., DeShong P. On the Synthesis and NMR Analysis of Tetrabutylammonium Triphenyldifluorosilicate. *The Journal of Organic Chemistry* 2000, **65**(11): 3542-3543.
2. Wettergren J., Ankner T., Hilmersson G. Selective [small alpha]-defluorination of polyfluorinated esters and amides using SmI<sub>2</sub>/Et<sub>3</sub>N/H<sub>2</sub>O. *Chemical Communications* 2010, **46**(40): 7596-7598.
3. Montiel-Smith S., Meza-Reyes S., Viñas-Bravo O., Fernández-Herrera M. A., Martínez-Pascual R., Sandoval-Ramírez J., *et al.* In situ preparation of mixed anhydrides containing the trifluoroacetyl moiety. Application to the esterification of cholesterol and phenol. *Arkivoc* 2005, **2005**(6).
4. Lin J.-H., Xiao J.-C. The Asymmetric Friedel–Crafts Reaction of Indoles with Fluoroalkylated Nitroalkenes Catalyzed by Chiral Phosphoric Acid. *European Journal of Organic Chemistry* 2011, **2011**(24): 4536-4539.
5. Bose A. K., Lal B. A facile replacement of hydroxyl by halogen with inversion. *Tetrahedron Letters* 1973, **14**(40): 3937-3940.
6. Murata M., Ishikura M., Nagata M., Watanabe S., Masuda Y. Rhodium(I)-Catalyzed Silylation of Aryl Halides with Triethoxysilane: Practical Synthetic Route to Aryltriethoxysilanes. *Org. Lett.* 2002, **4**(11): 1843-1845.
7. Tacke R., Mahner K., Strohmam C., Forth B., Mutschler E., Friebe T., *et al.* Cyclohexy (4-fluorophenyl)(3-piperidinopropyl)silanol ((itp)-fluoro-hexahydro-sila-difenidol, p-F-HSSiD) and derivatives: synthesis and antimuscarinic properties. *Journal of Organometallic Chemistry* 1991, **417**(3): 339-353.
8. Manoso A. S., Ahn C., Soheili A., Handy C. J., Correia R., Seganish W. M., *et al.* Improved Synthesis of Aryltrialkoxysilanes via Treatment of Aryl Grignard or Lithium Reagents with Tetraalkyl Orthosilicates. *The Journal of Organic Chemistry* 2004, **69**(24): 8305-8314.
9. Krasovskiy A., Knochel P. A LiCl-mediated Br/Mg exchange reaction for the preparation of functionalized aryl- and heteroarylmagnesium compounds from organic bromides. *Angew. Chem. Int. Ed. Engl.* 2004, **43**(25): 3333-3336.

10. Chauhan M., Hauck B. J., Keller L. P., Boudjouk P. Hydrosilylation of alkynes catalyzed by platinum on carbon. *Journal of Organometallic Chemistry* 2002, **645**(1): 1-13.
11. Corriu R. J. P., Lancelle-Beltran E., Mehdi A., Reye C., Brandes S., Guillard R. Ordered mesoporous hybrid materials containing cobalt(ii) Schiff base complex. *Journal of Materials Chemistry* 2002, **12**(5): 1355-1362.
12. Xu Q., Zhou H., Geng X., Chen P. Nonenzymatic kinetic resolution of racemic 2,2,2-trifluoro-1-aryl ethanol via enantioselective acylation. *Tetrahedron* 2009, **65**(11): 2232-2238.
13. Fuji K., Kawabata T., Fujita E. Hard acid and soft nucleophile system. IV. Removal of benzyl protecting group with boron trifluoride etherate and dimethyl sulfide. *Chemical & Pharmaceutical Bulletin* 1980, **28**(12): 3662-3664.
14. Song J. J., Tan Z., Reeves J. T., Gallou F., Yee N. K., Senanayake C. H. N-Heterocyclic Carbene Catalyzed Trifluoromethylation of Carbonyl Compounds. *Organic Letters* 2005, **7**(11): 2193-2196.
